# Supplementary figures and images for: Altered microRNA Transcriptome in Cultured Human Liver Cells upon Infection with Ebola Virus (part 1 of 4)
Source: MDPI journal article supplement (doi:10.3390/ijms22073792), 2021-04-06

# GO Molecular Function Classification

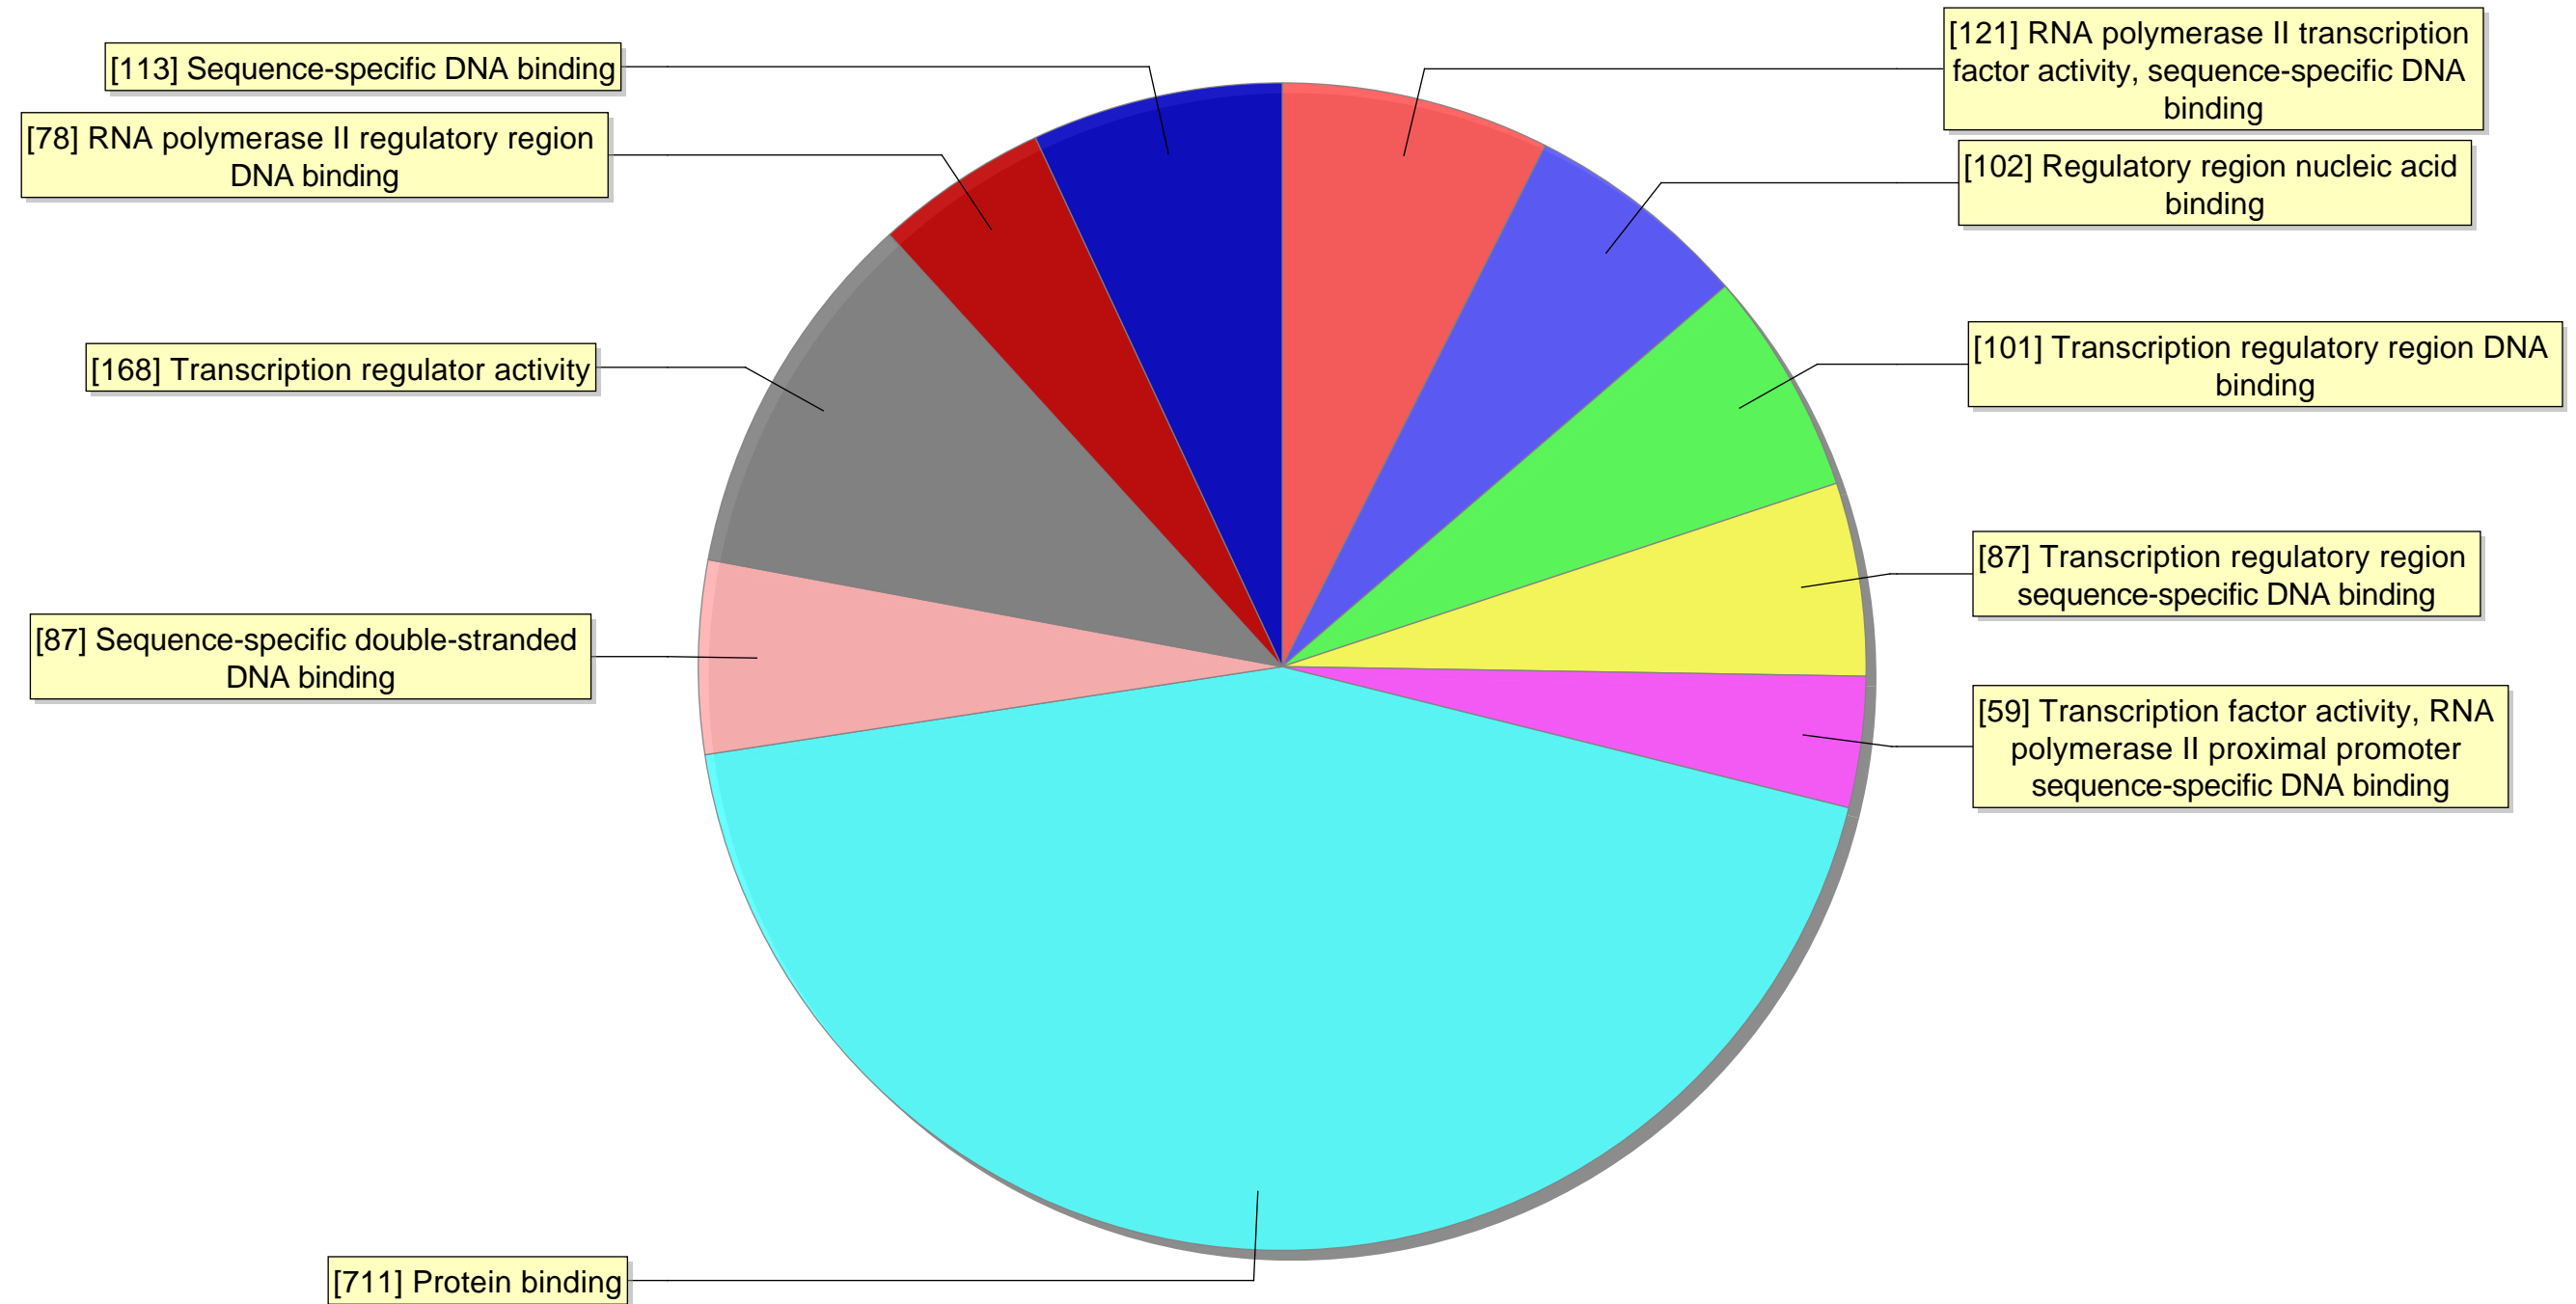

Supplement: s1 [file s1]

## Sig GO terms of DE gene-CC

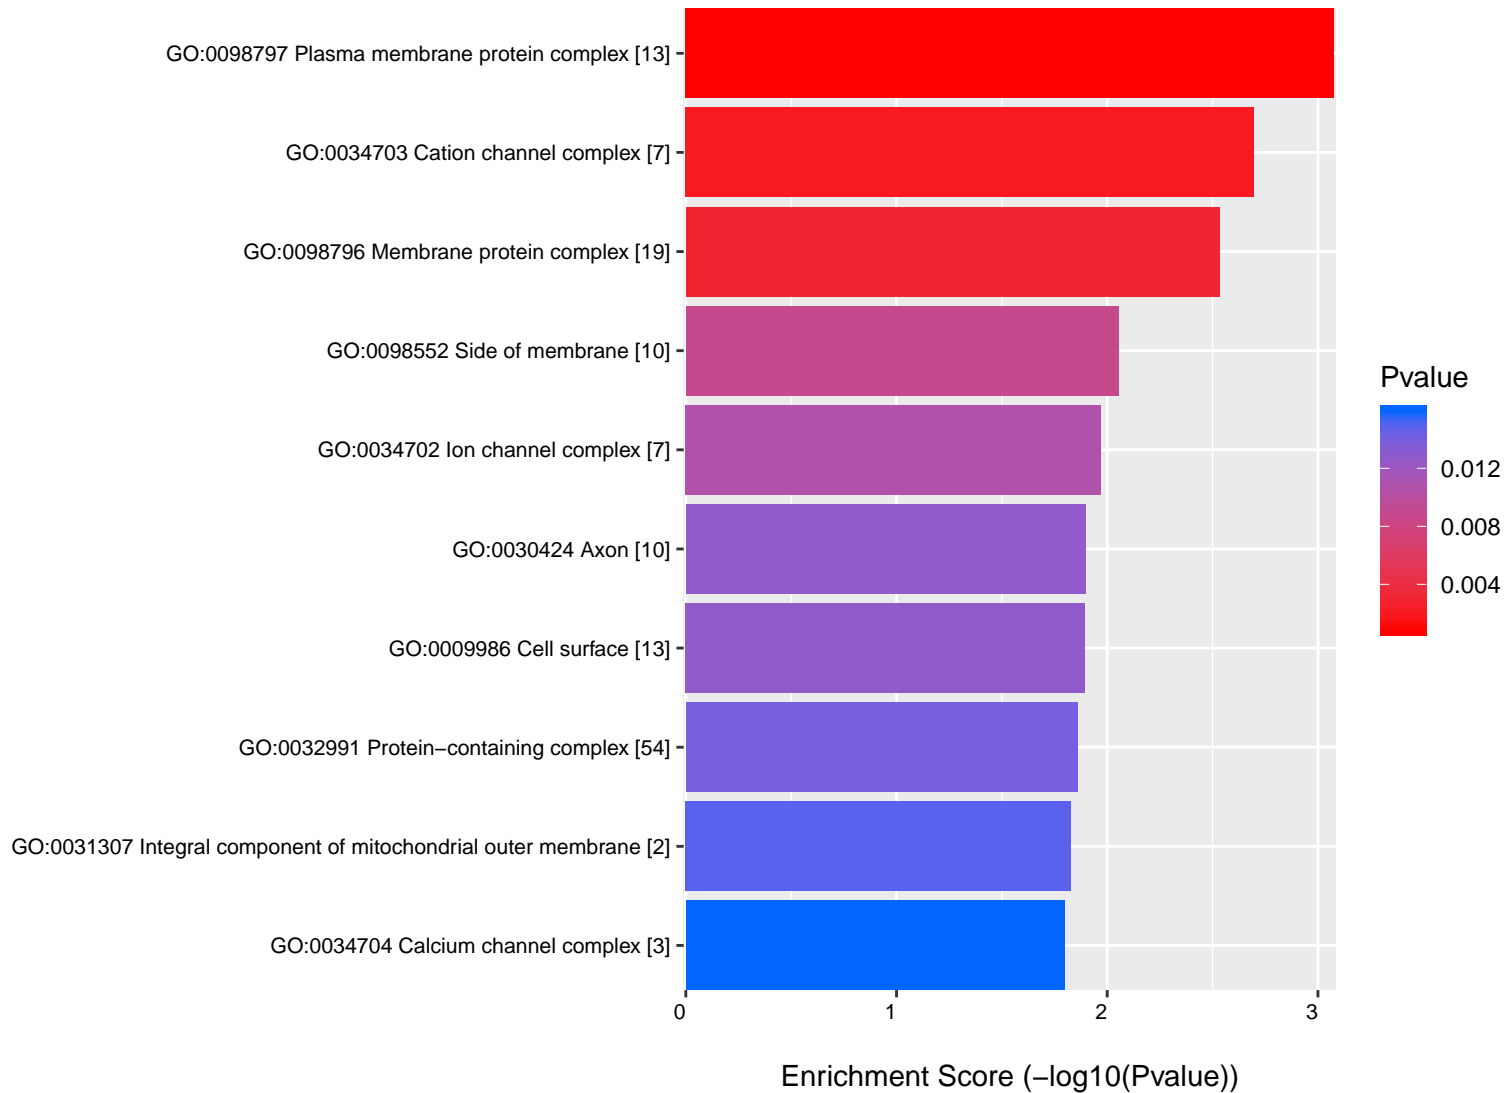

Supplement: s1 [file s1]

# Sig pathway of DE gene

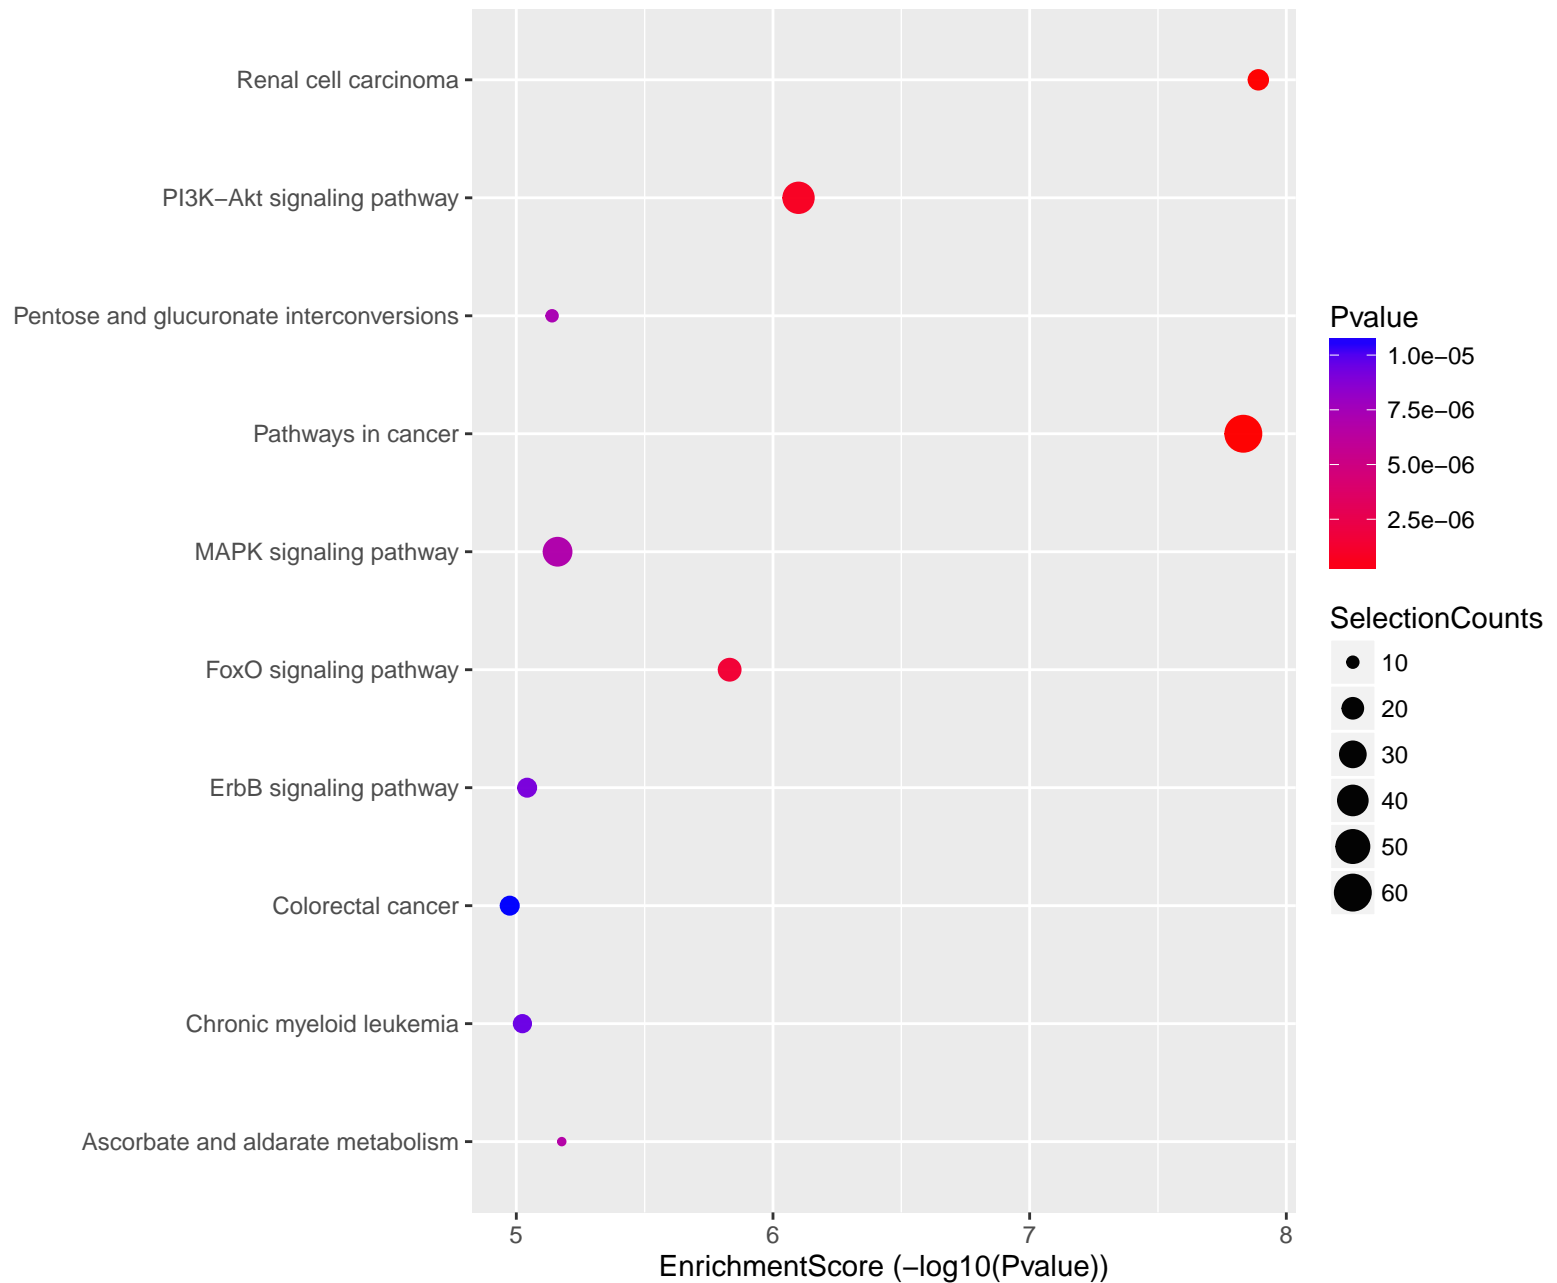

Supplement: s1 [file s1]

Sig GO terms of DE gene

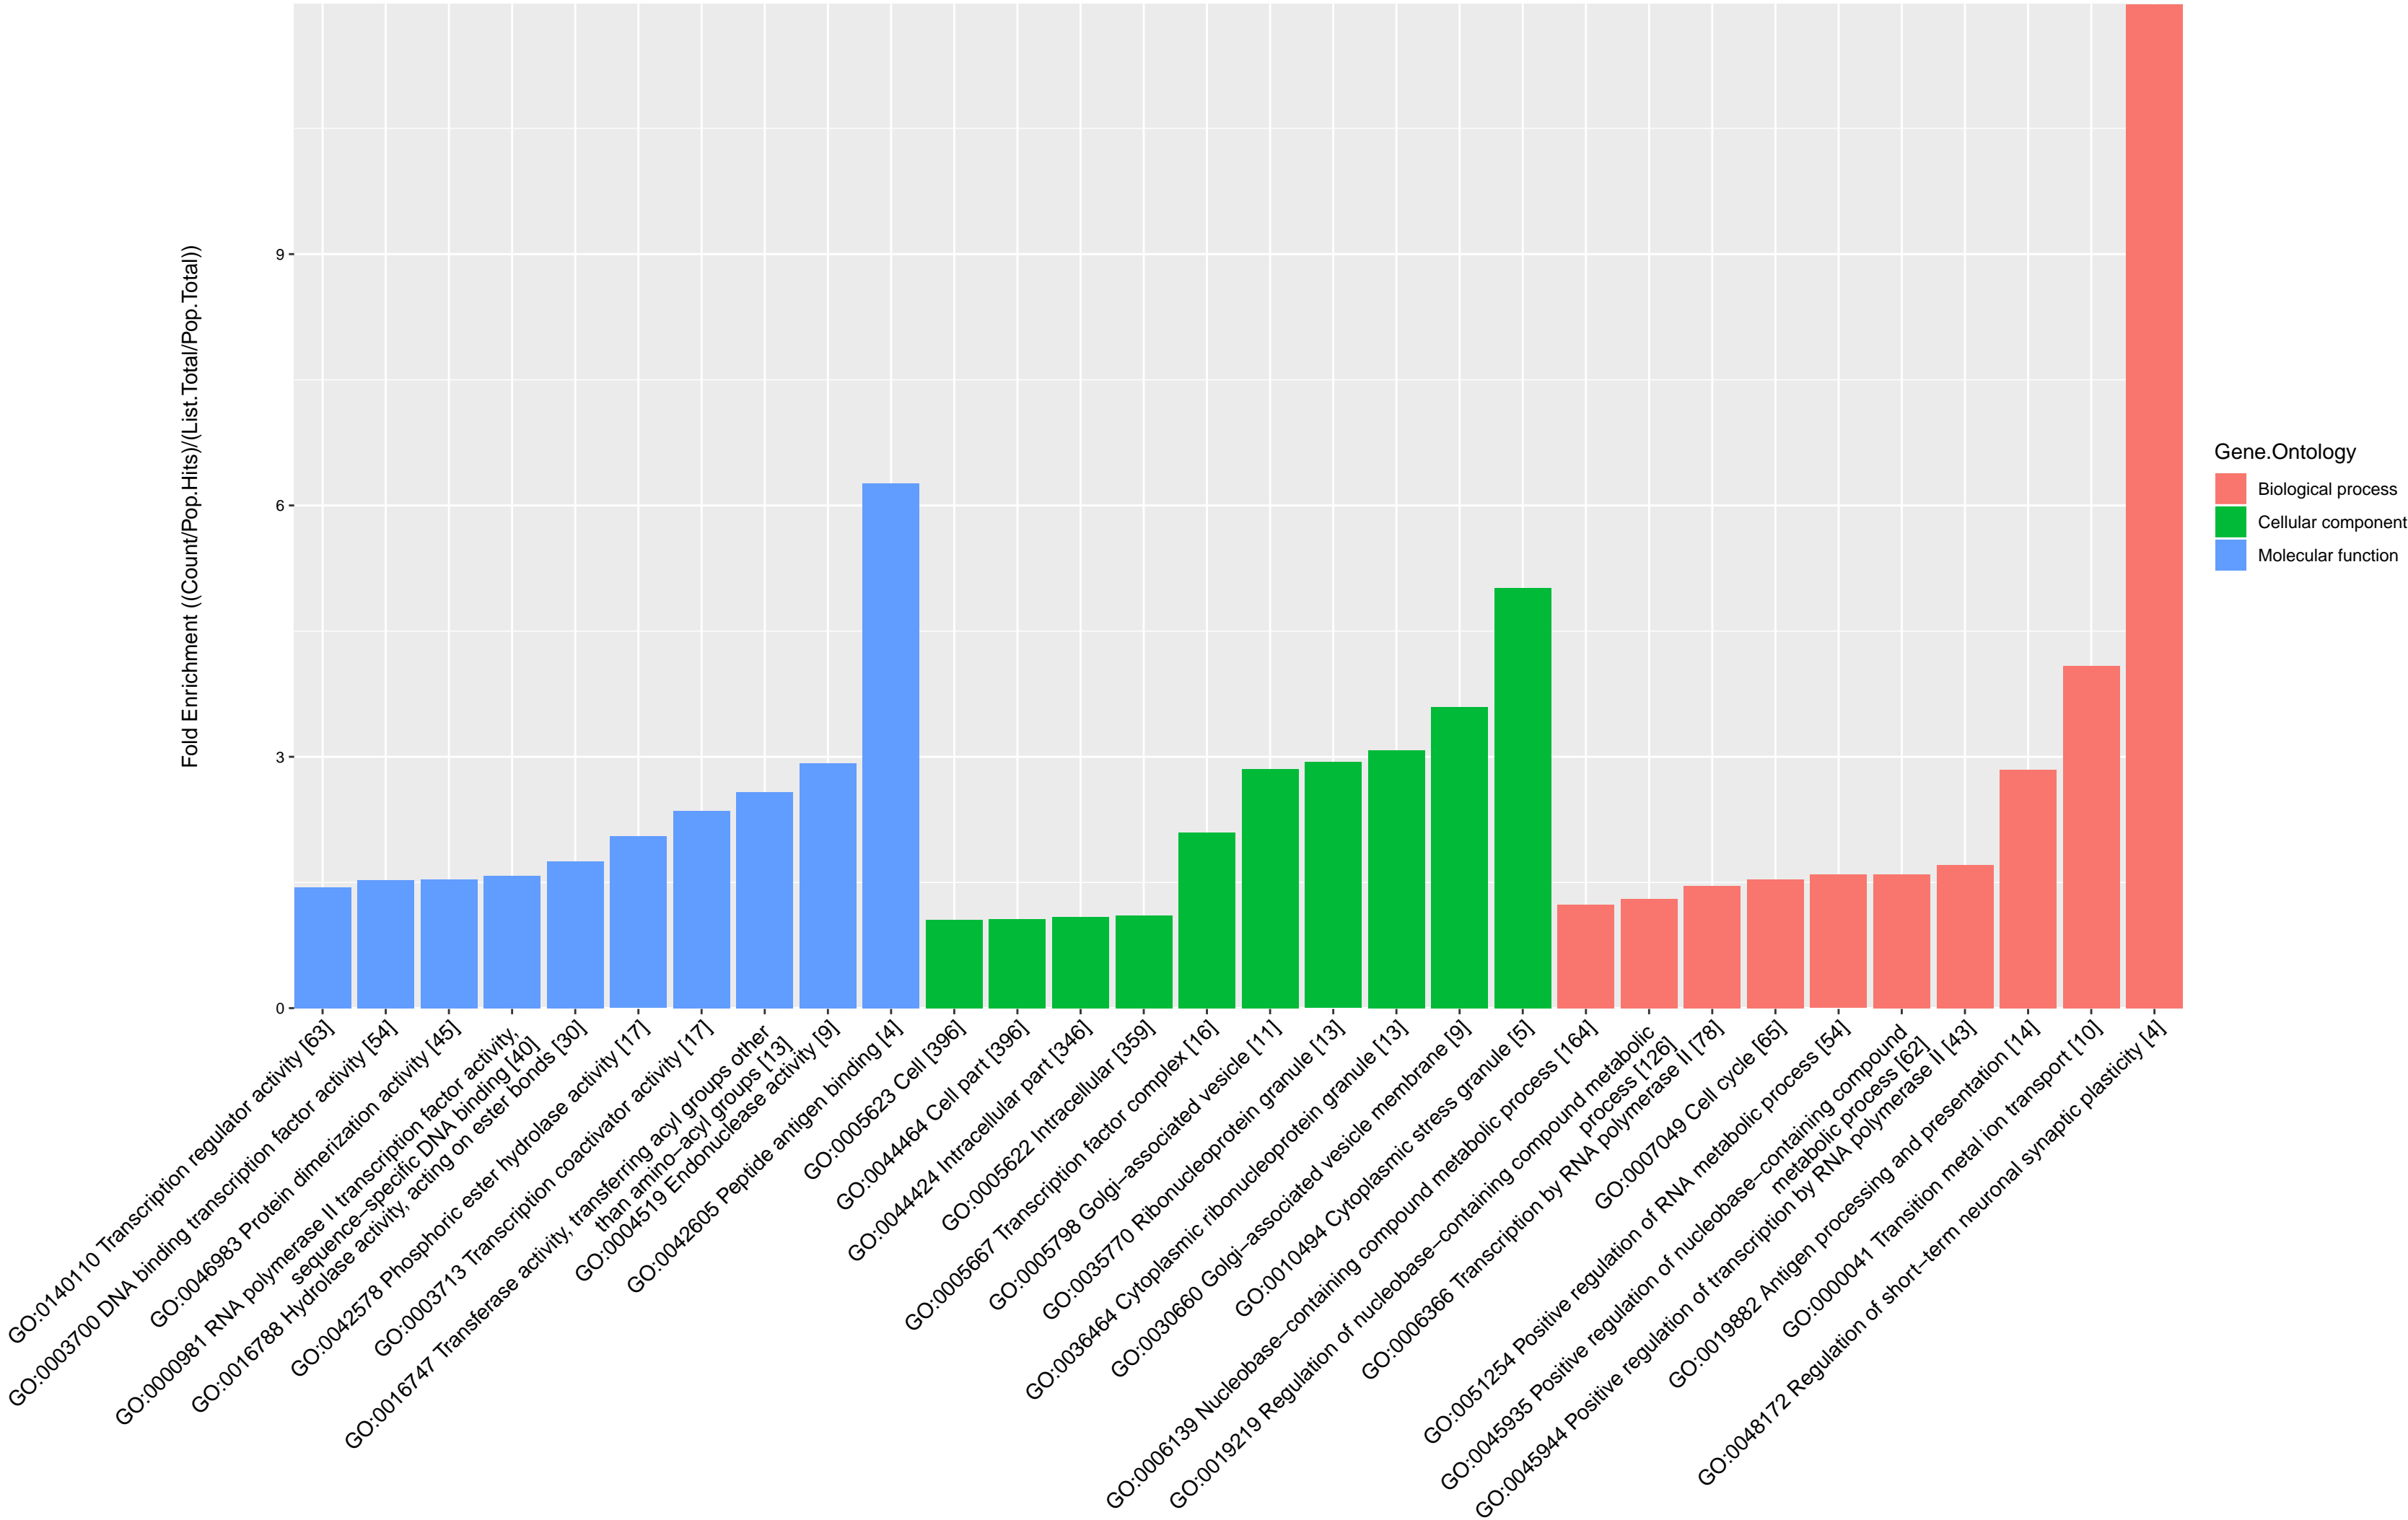

Supplement: s1 [file s1]

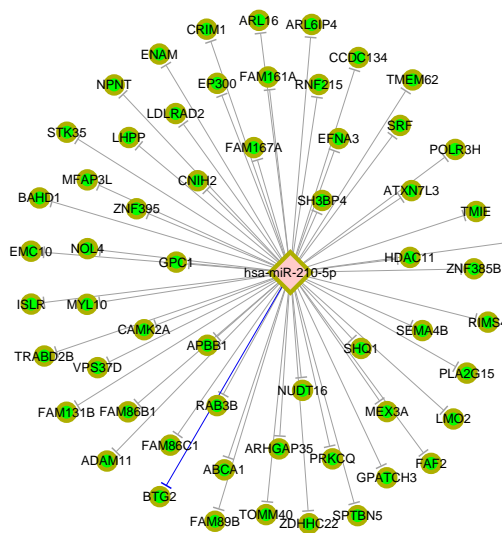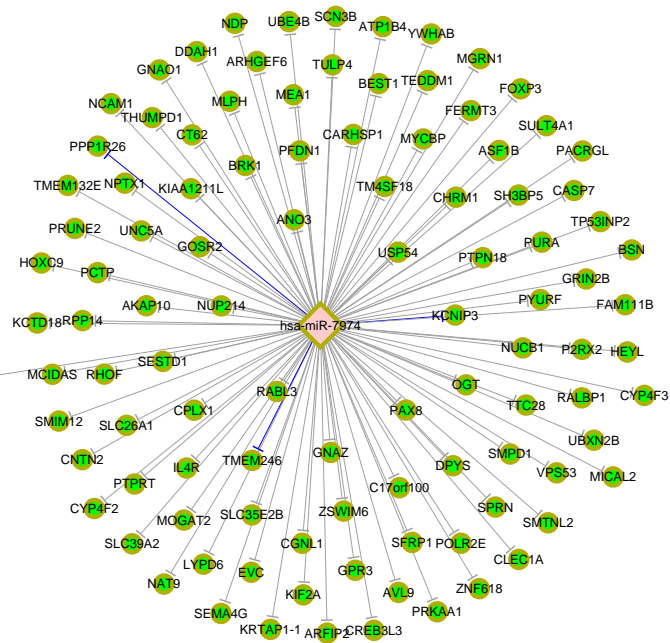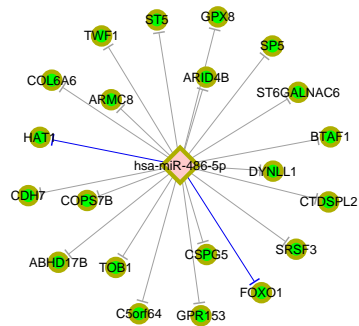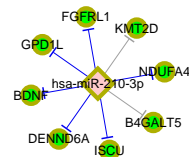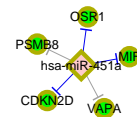

Supplement: s1 [file s1]

## Sig GO terms of DE gene-MF

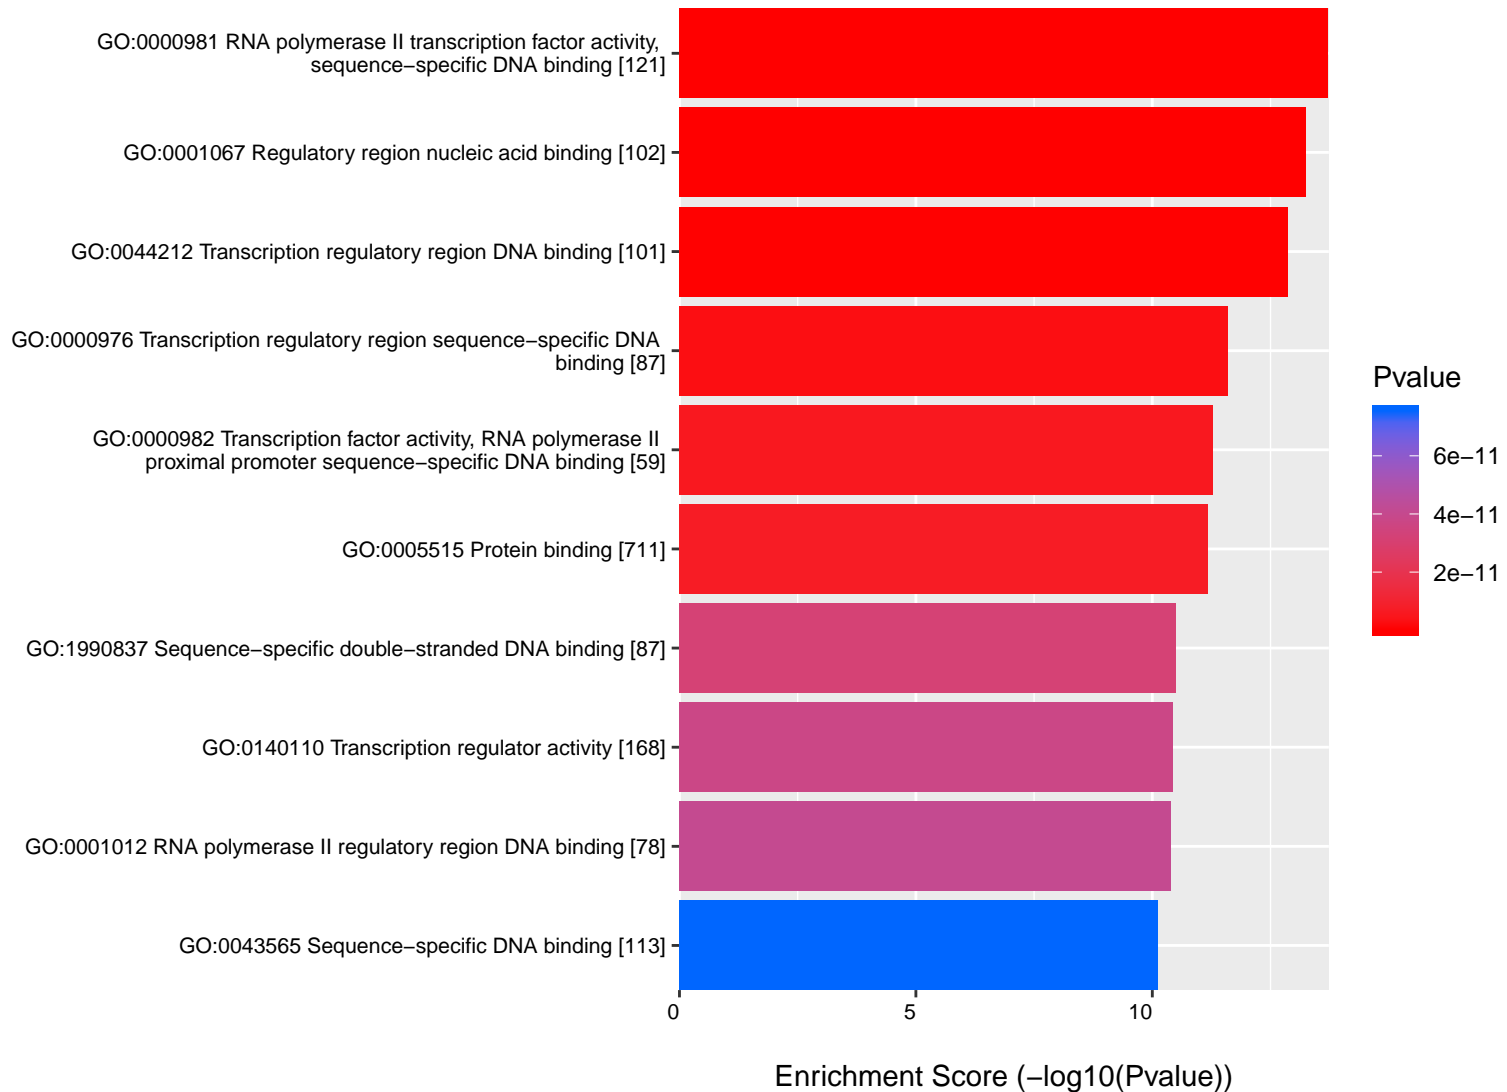

Supplement: s1 [file s1]

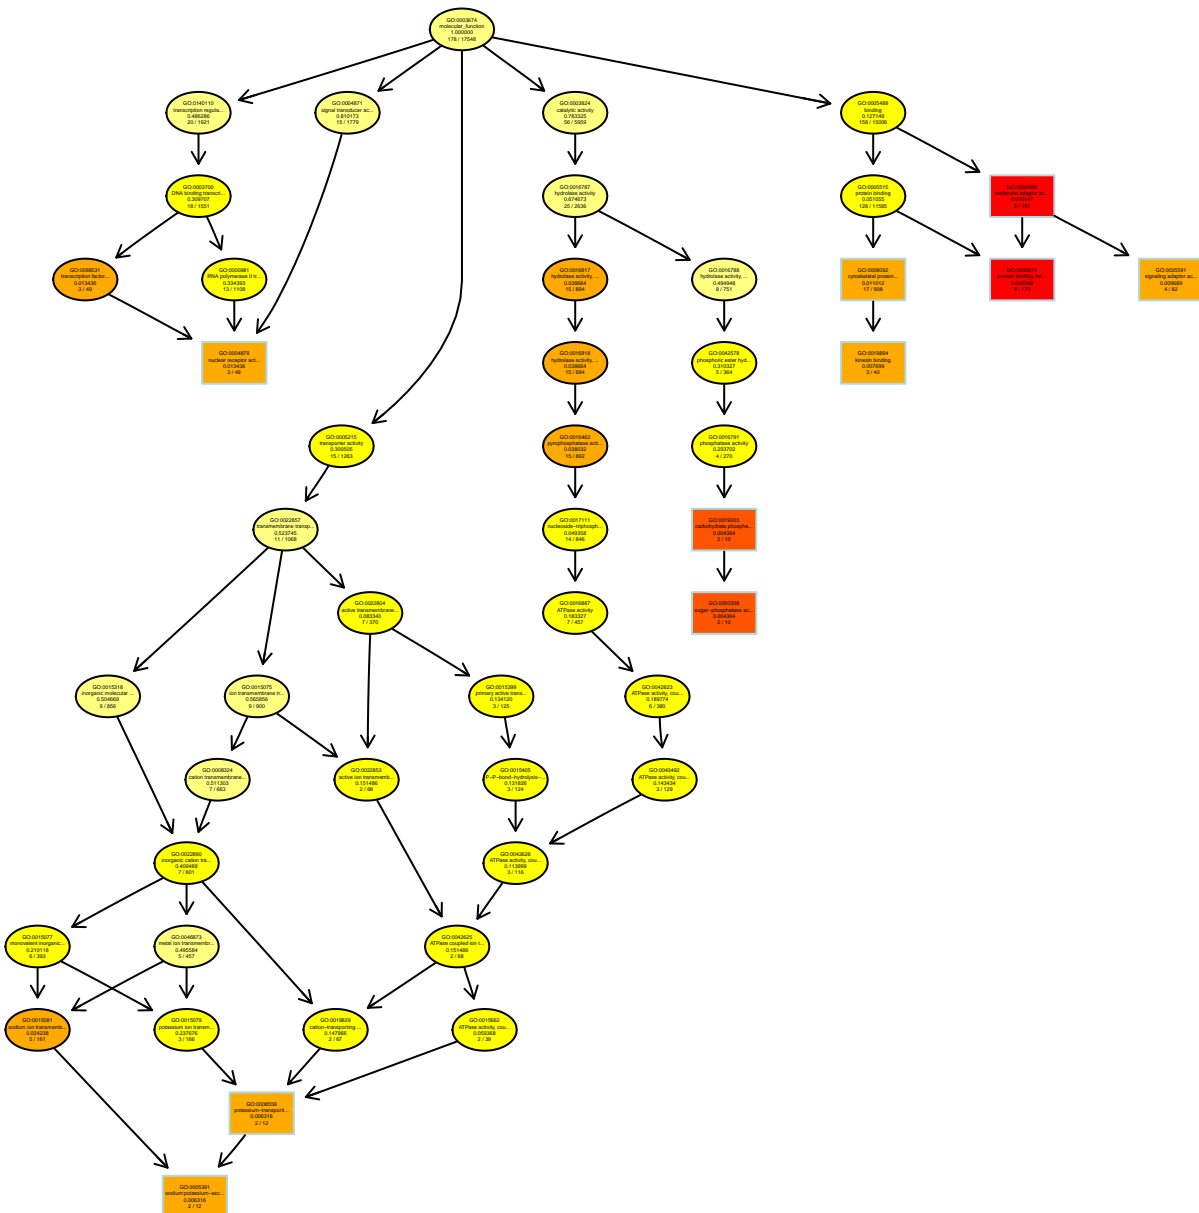

Supplement: s1 [file s1]

## Sig GO terms of DE gene–MF

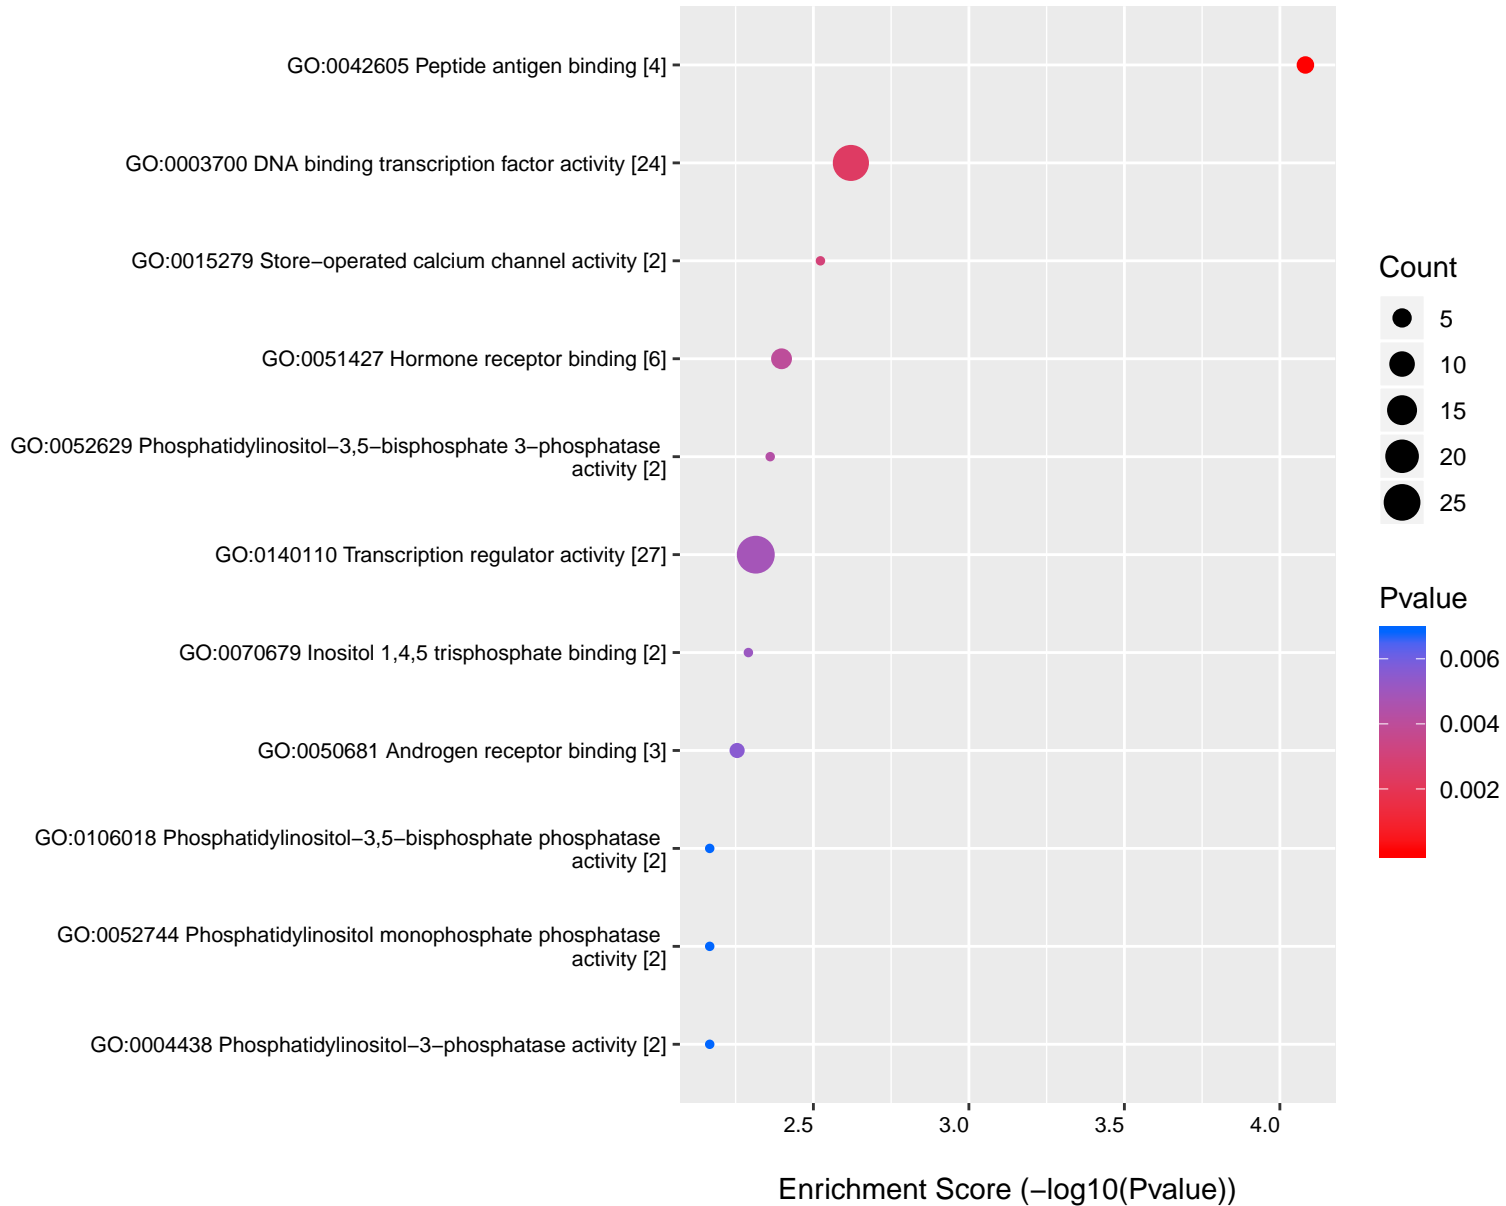

Supplement: s1 [file s1]

## Sig pathway of DE gene

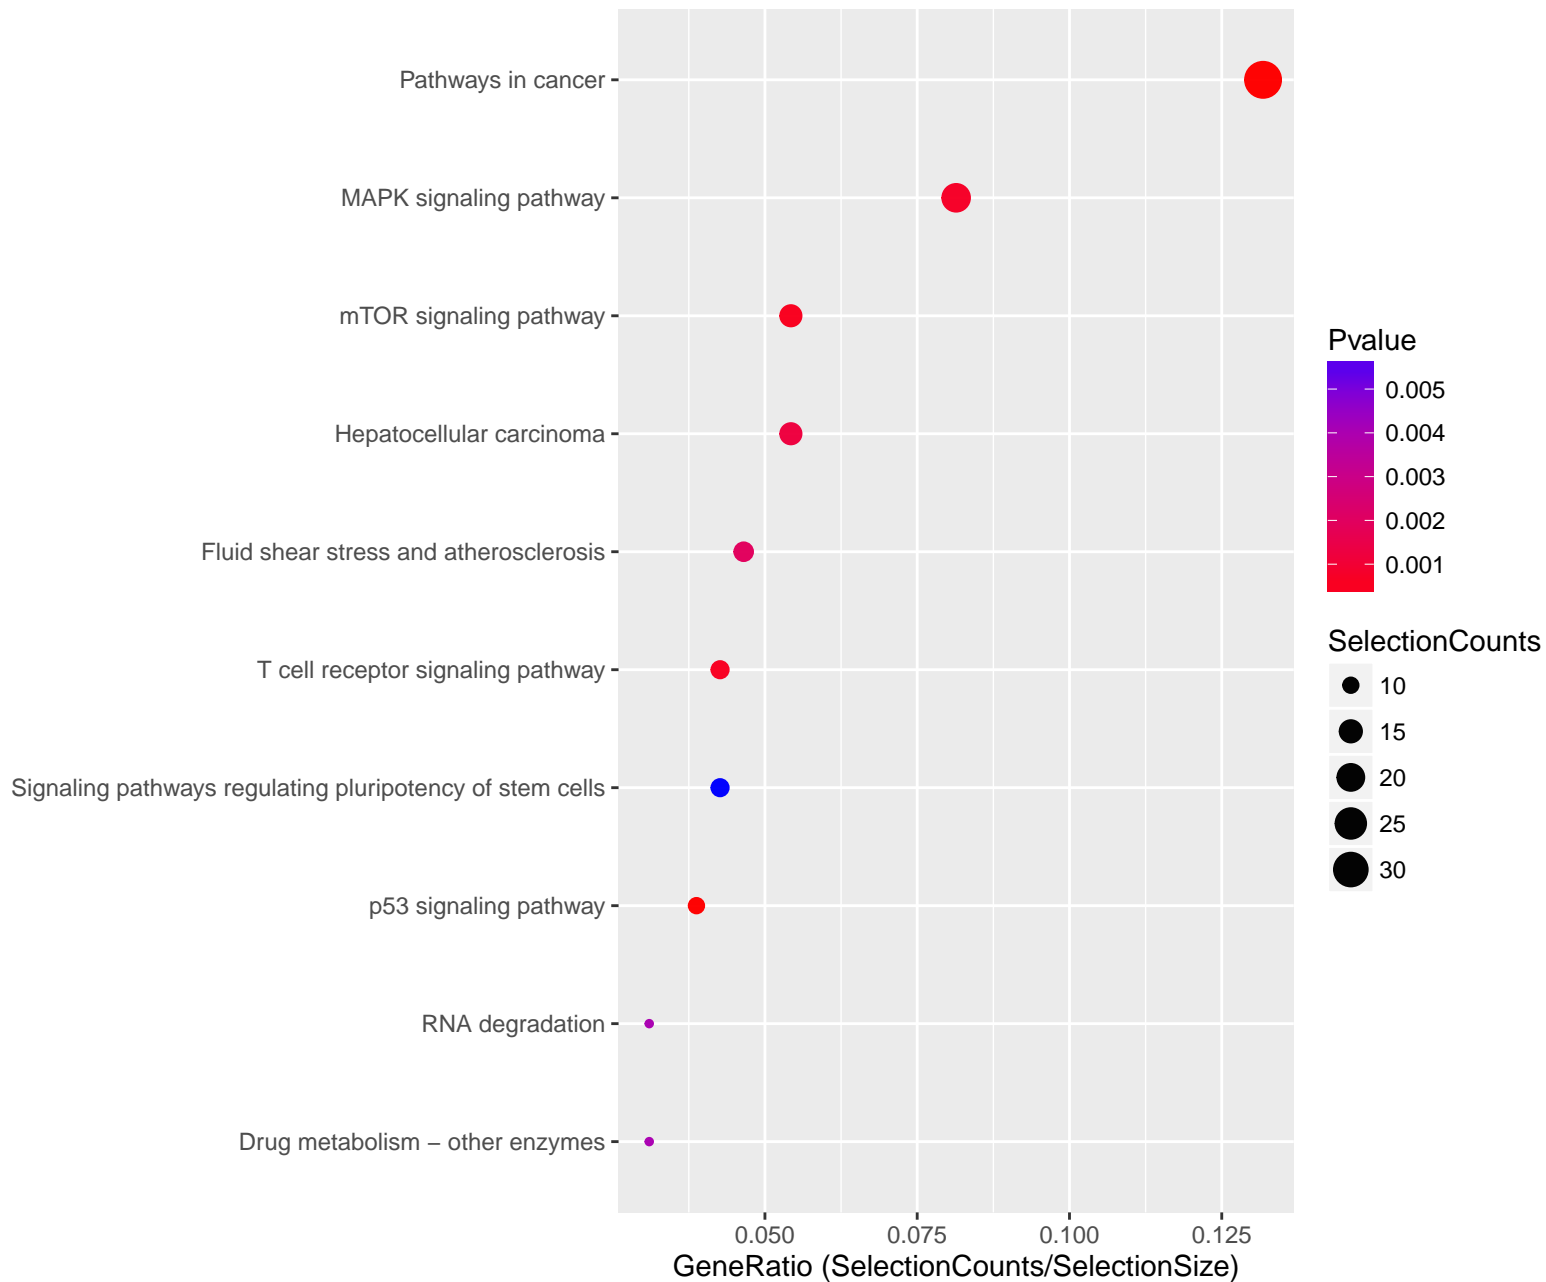

Supplement: s1 [file s1]

# Sig GO terms of DE gene-MF

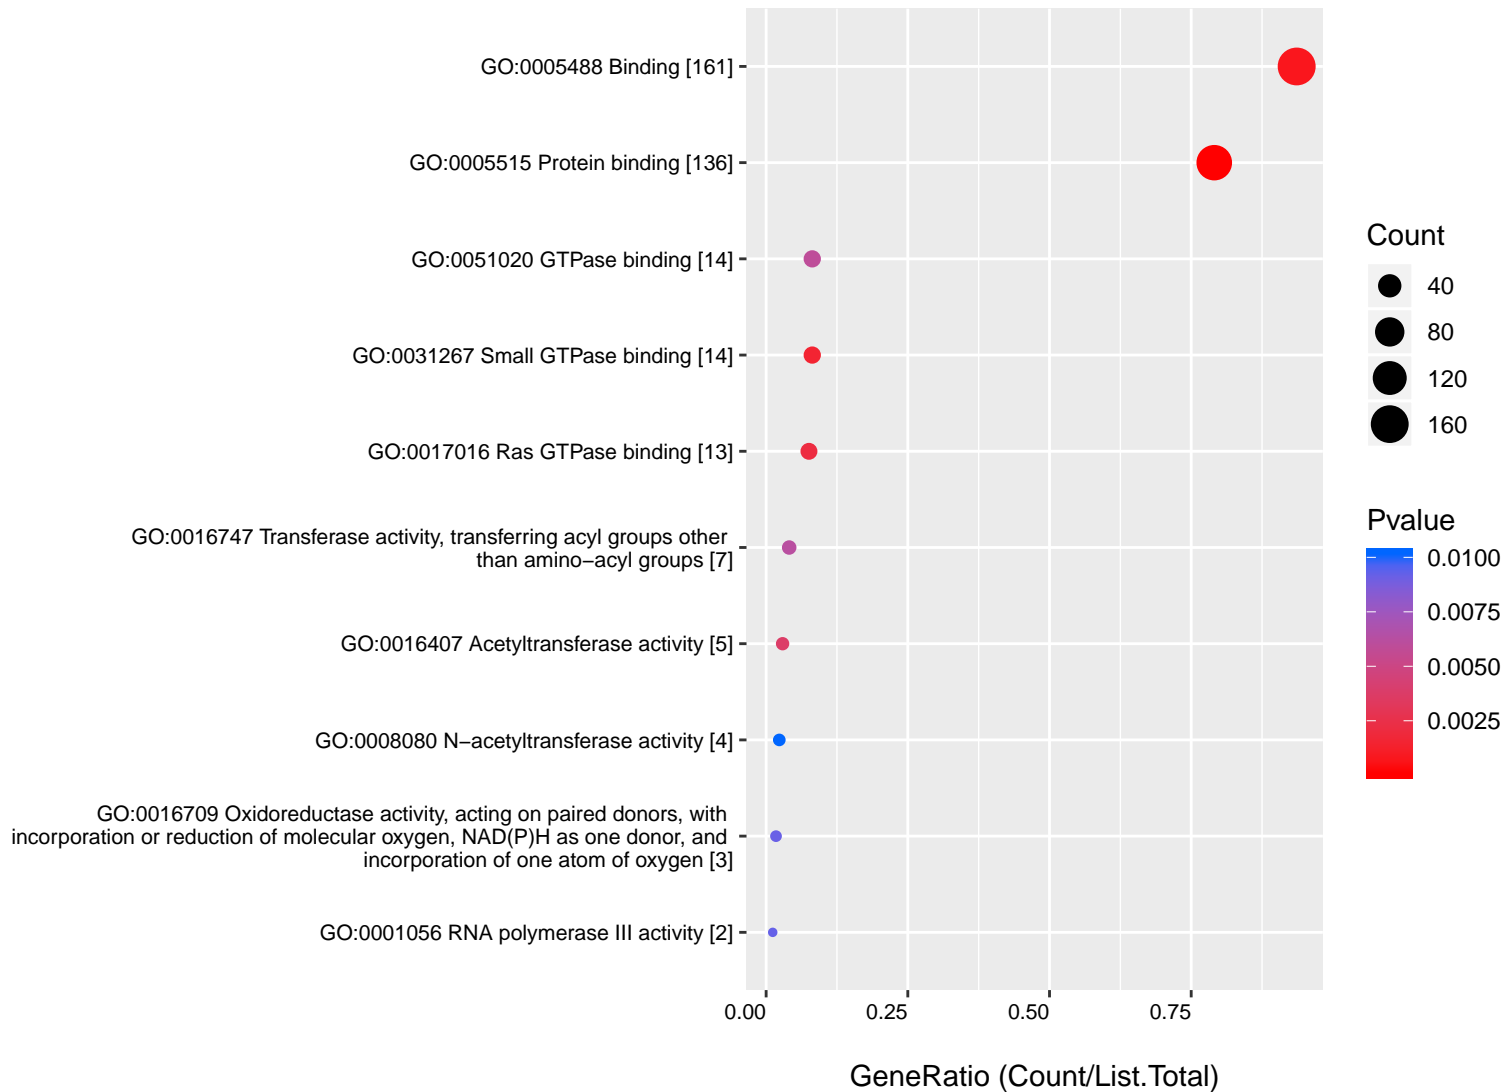

Supplement: s1 [file s1]

## Sig GO terms of DE gene-CC

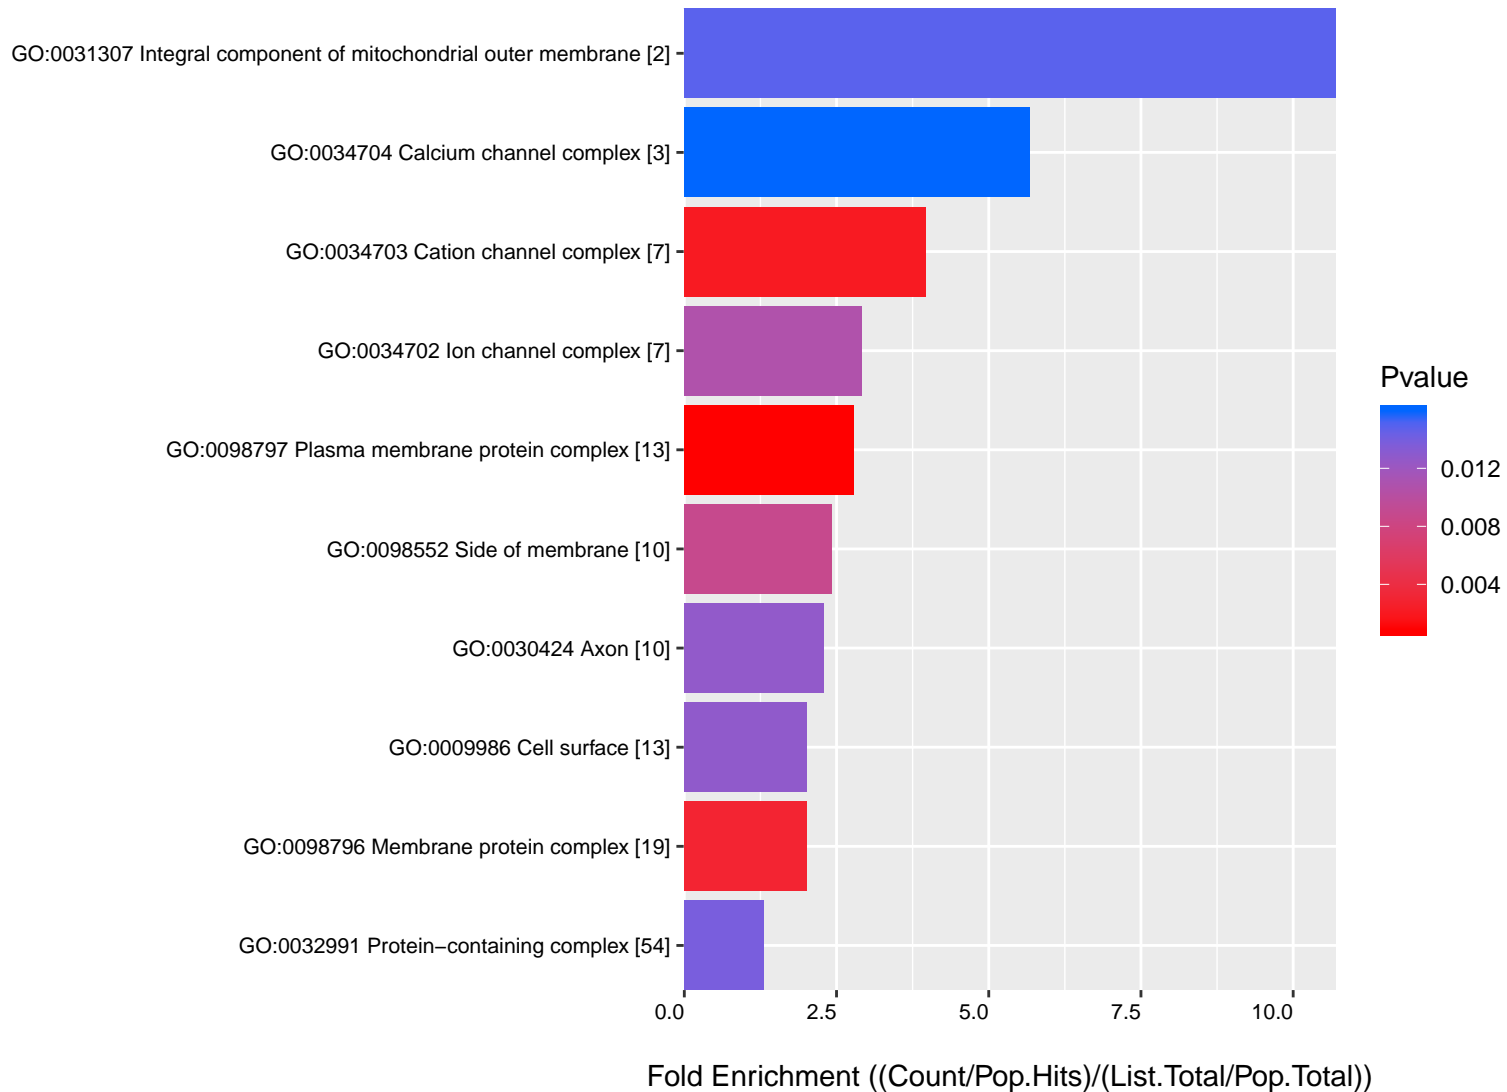

Supplement: s1 [file s1]

# Sig GO terms of DE gene-BP

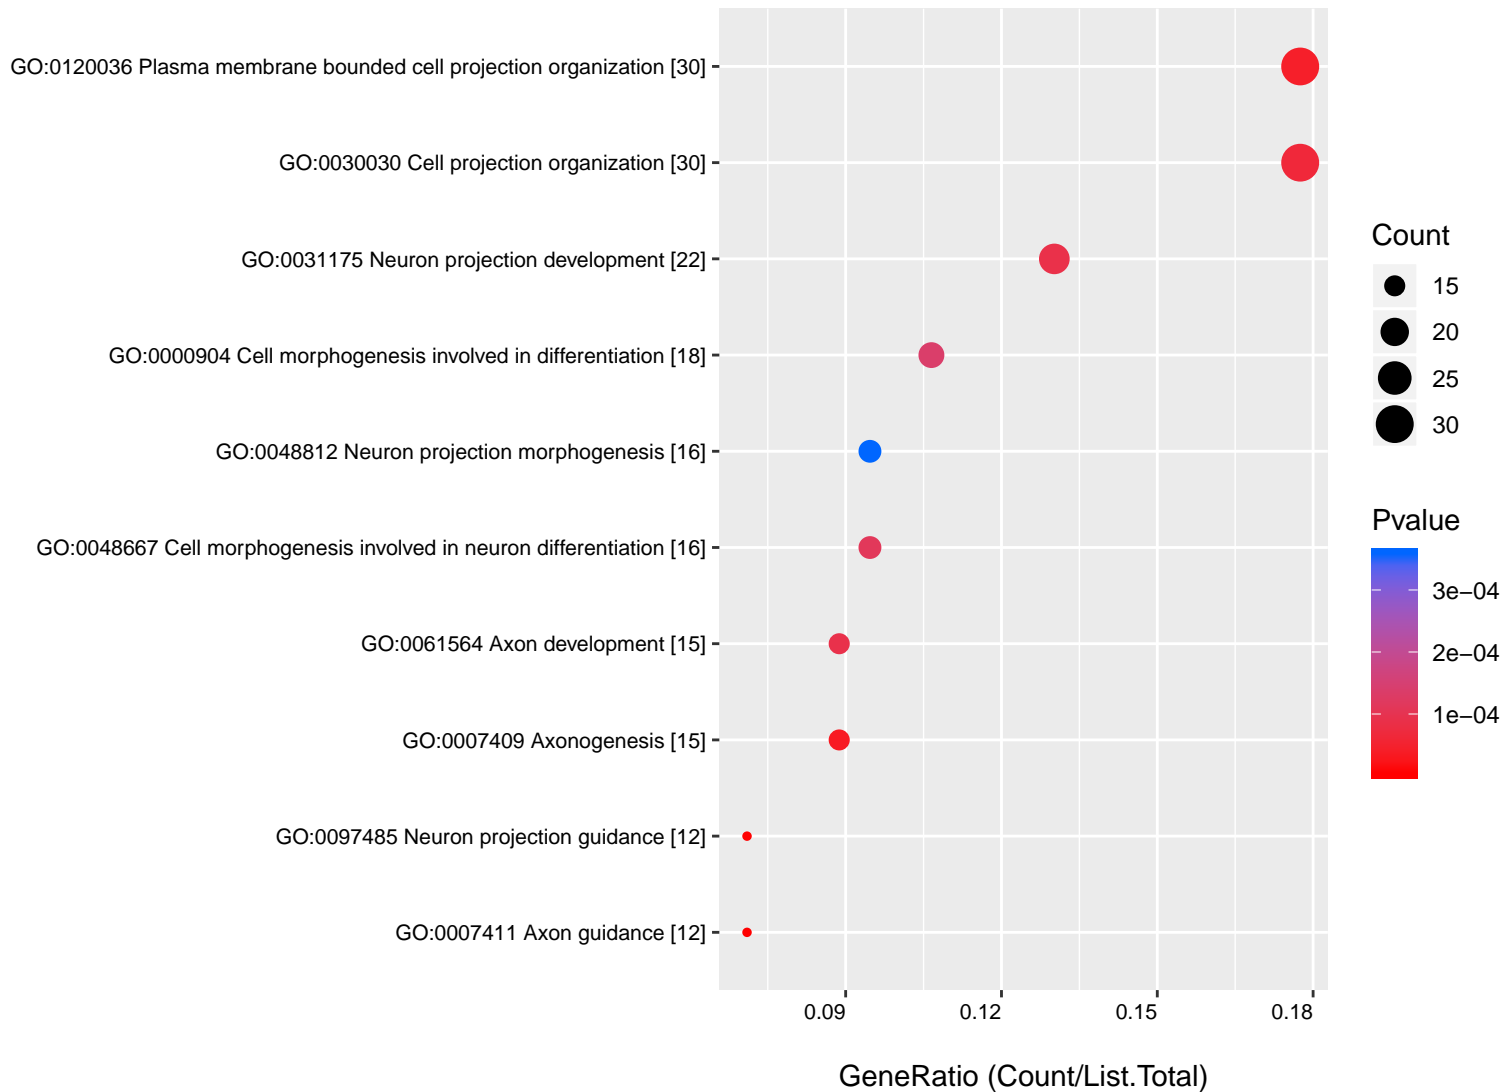

Supplement: s1 [file s1]

# Sig GO terms of DE gene-MF

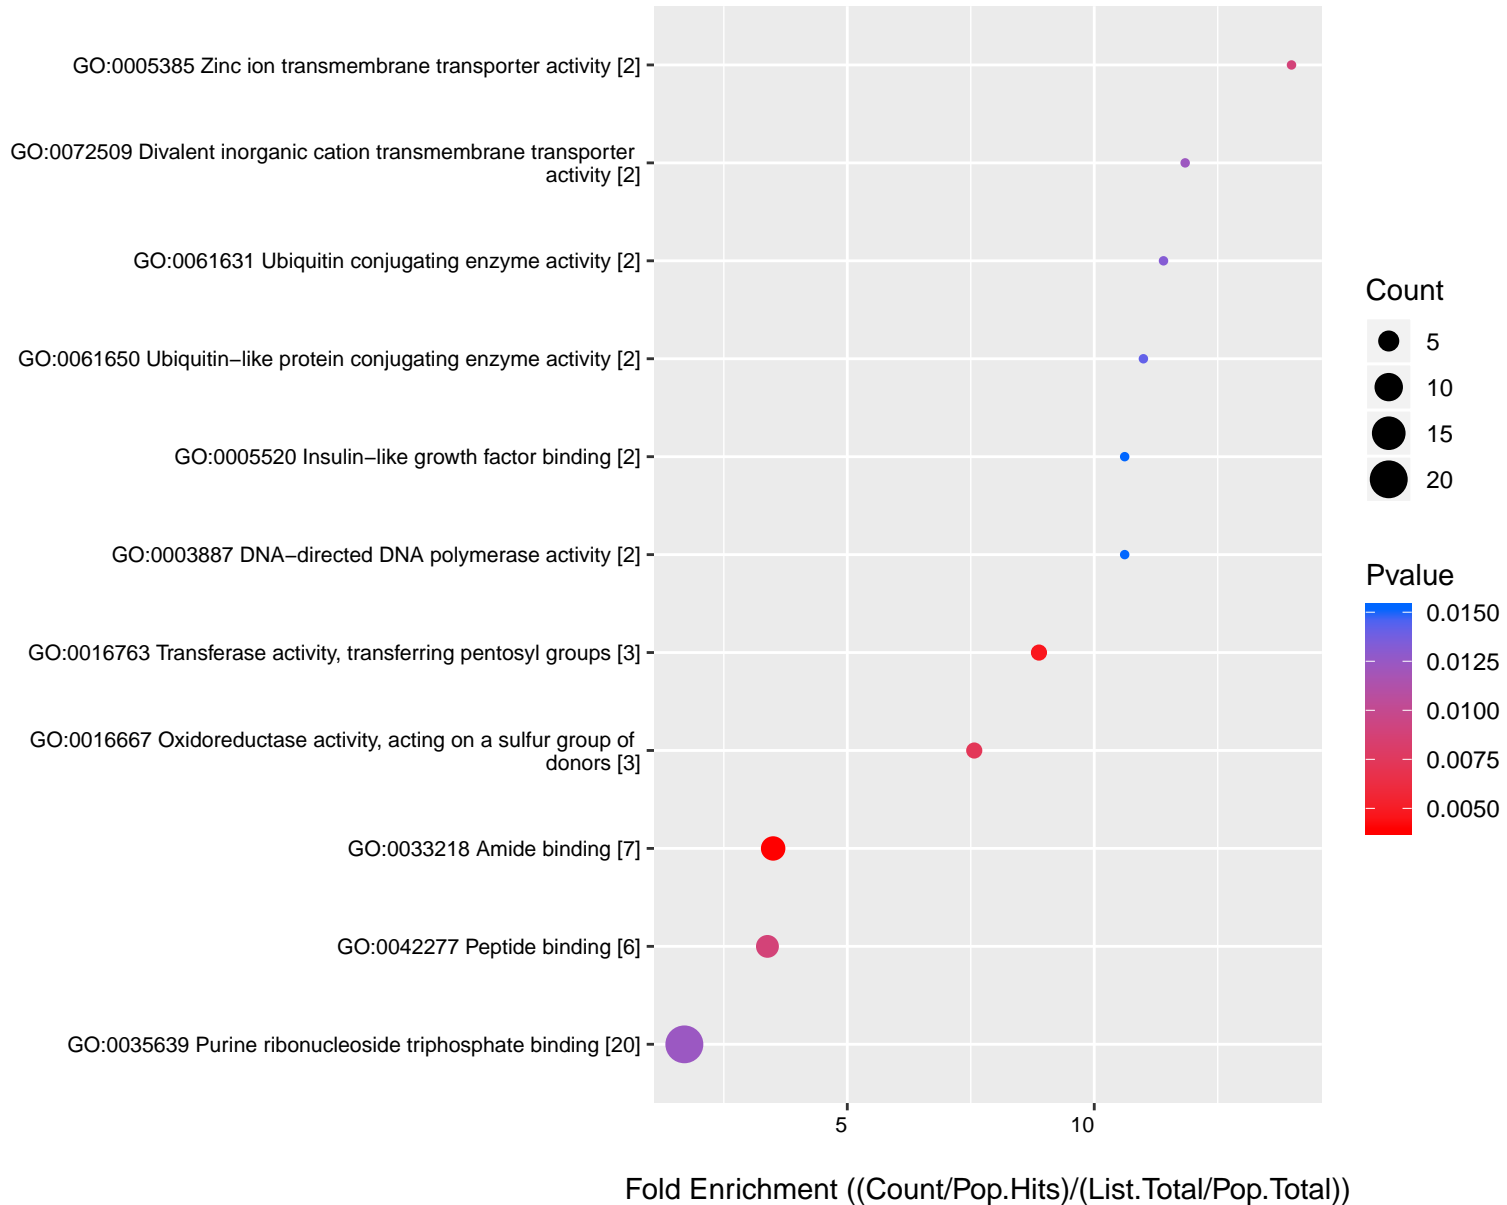

Supplement: s1 [file s1]

# Sig GO terms of DE gene-MF

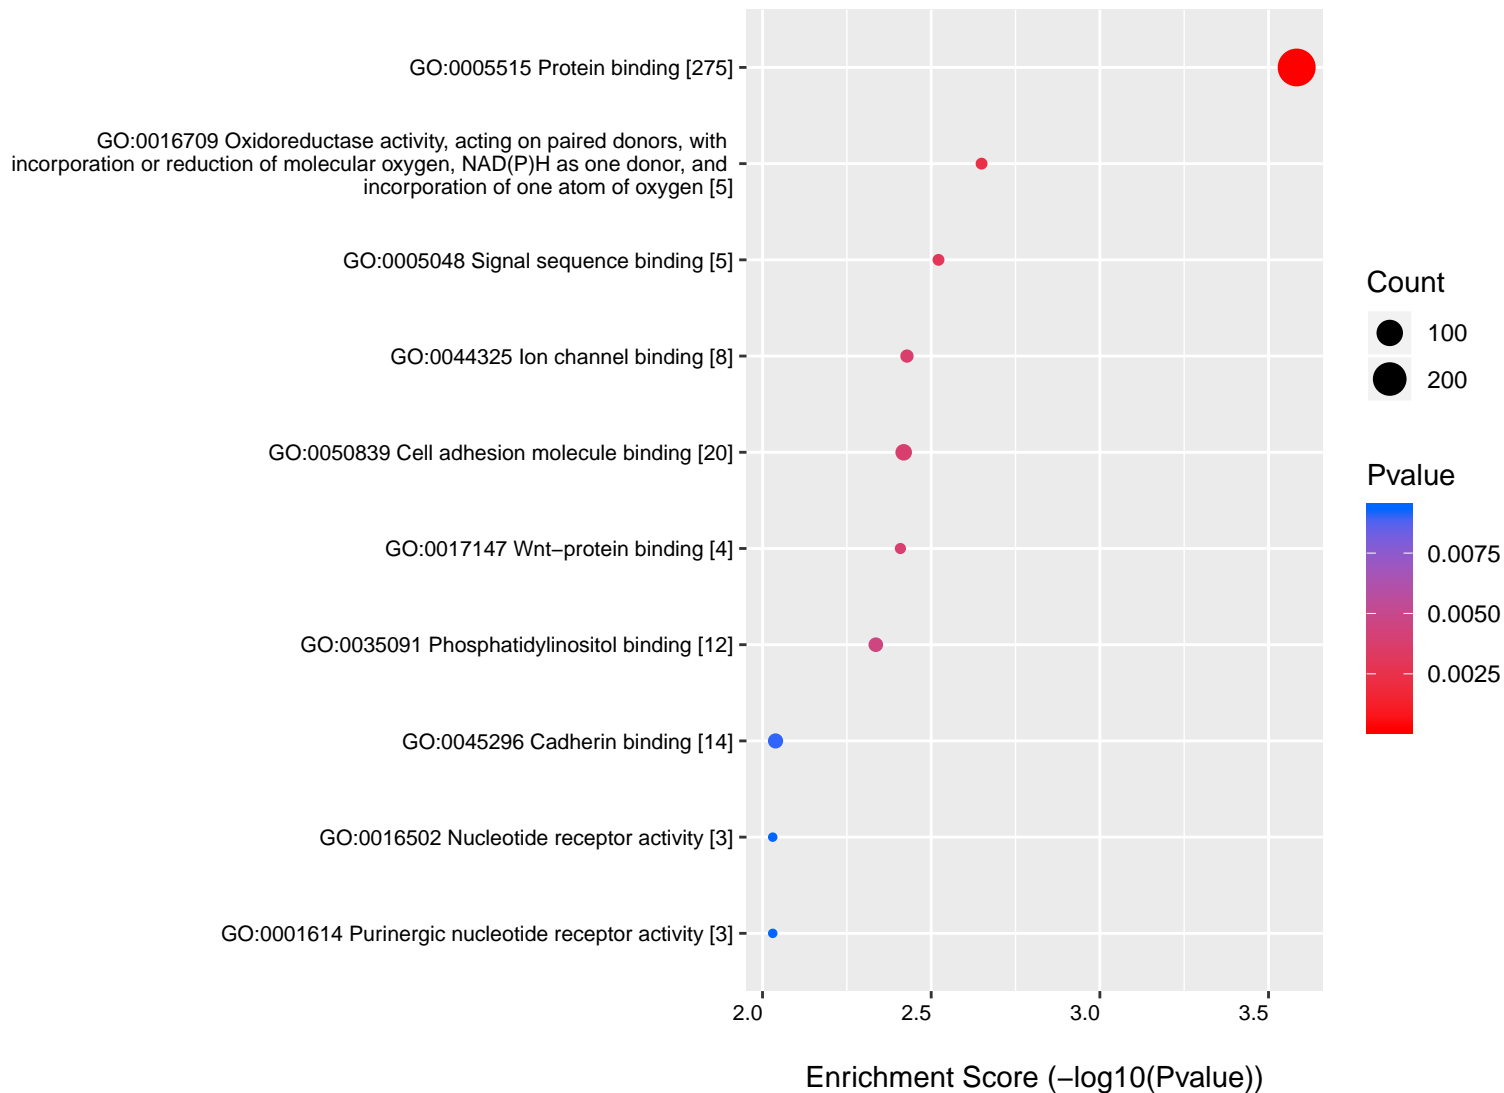

Supplement: s1 [file s1]

## Sig GO terms of DE gene-MF

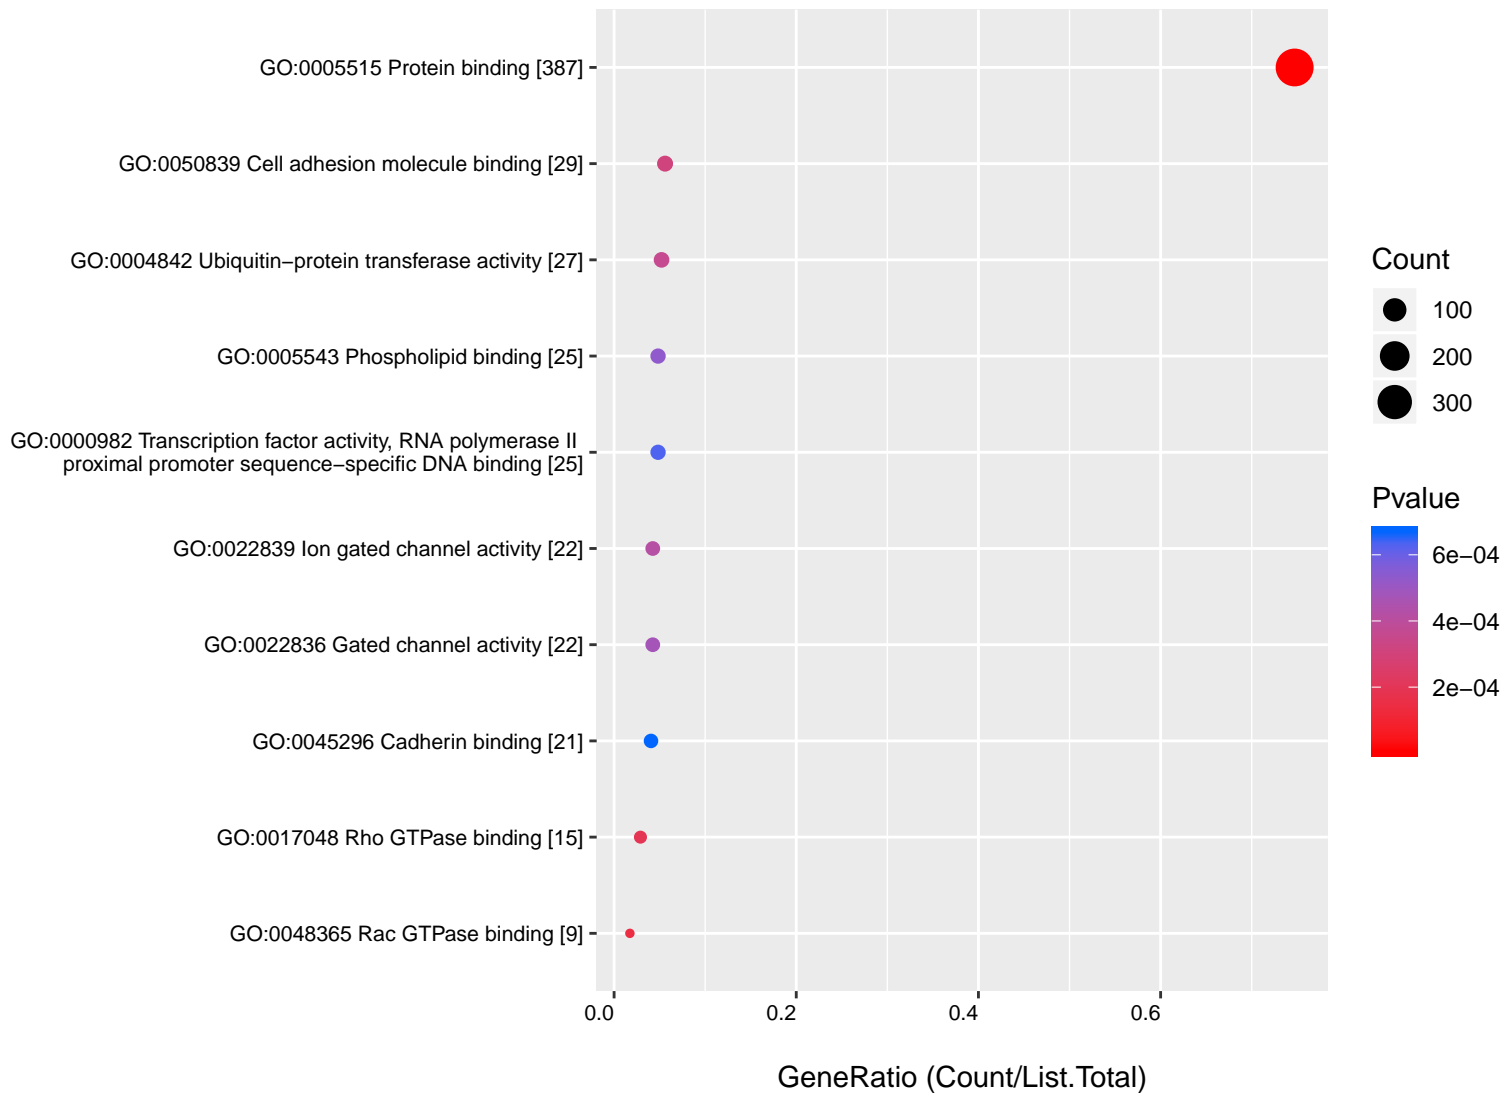

Supplement: s1 [file s1]

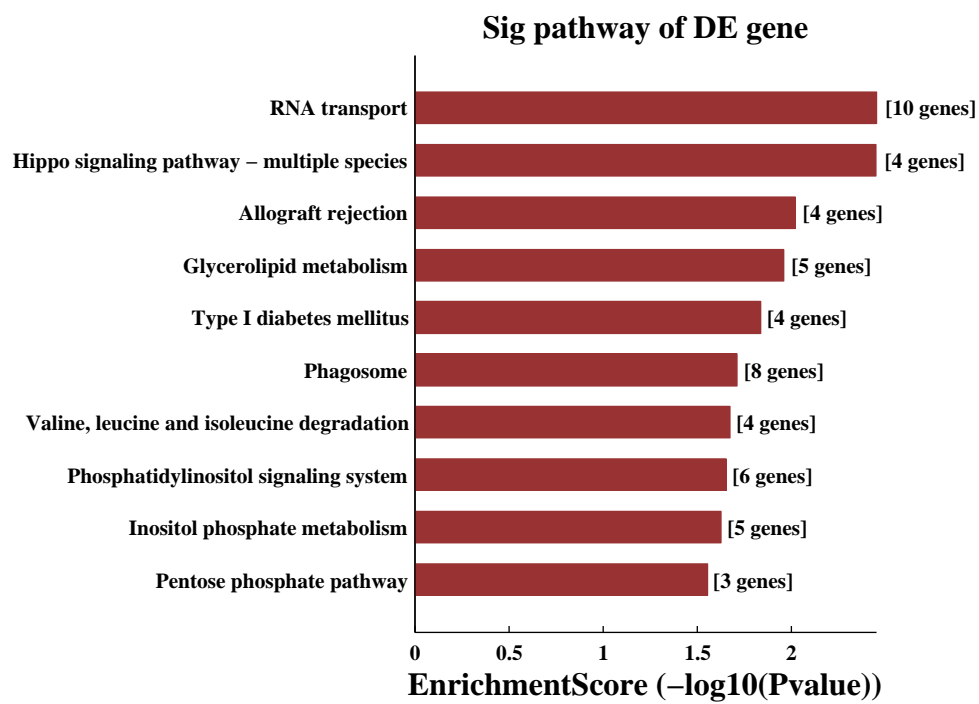

Supplement: s1 [file s1]

## Sig GO terms of DE gene-BP

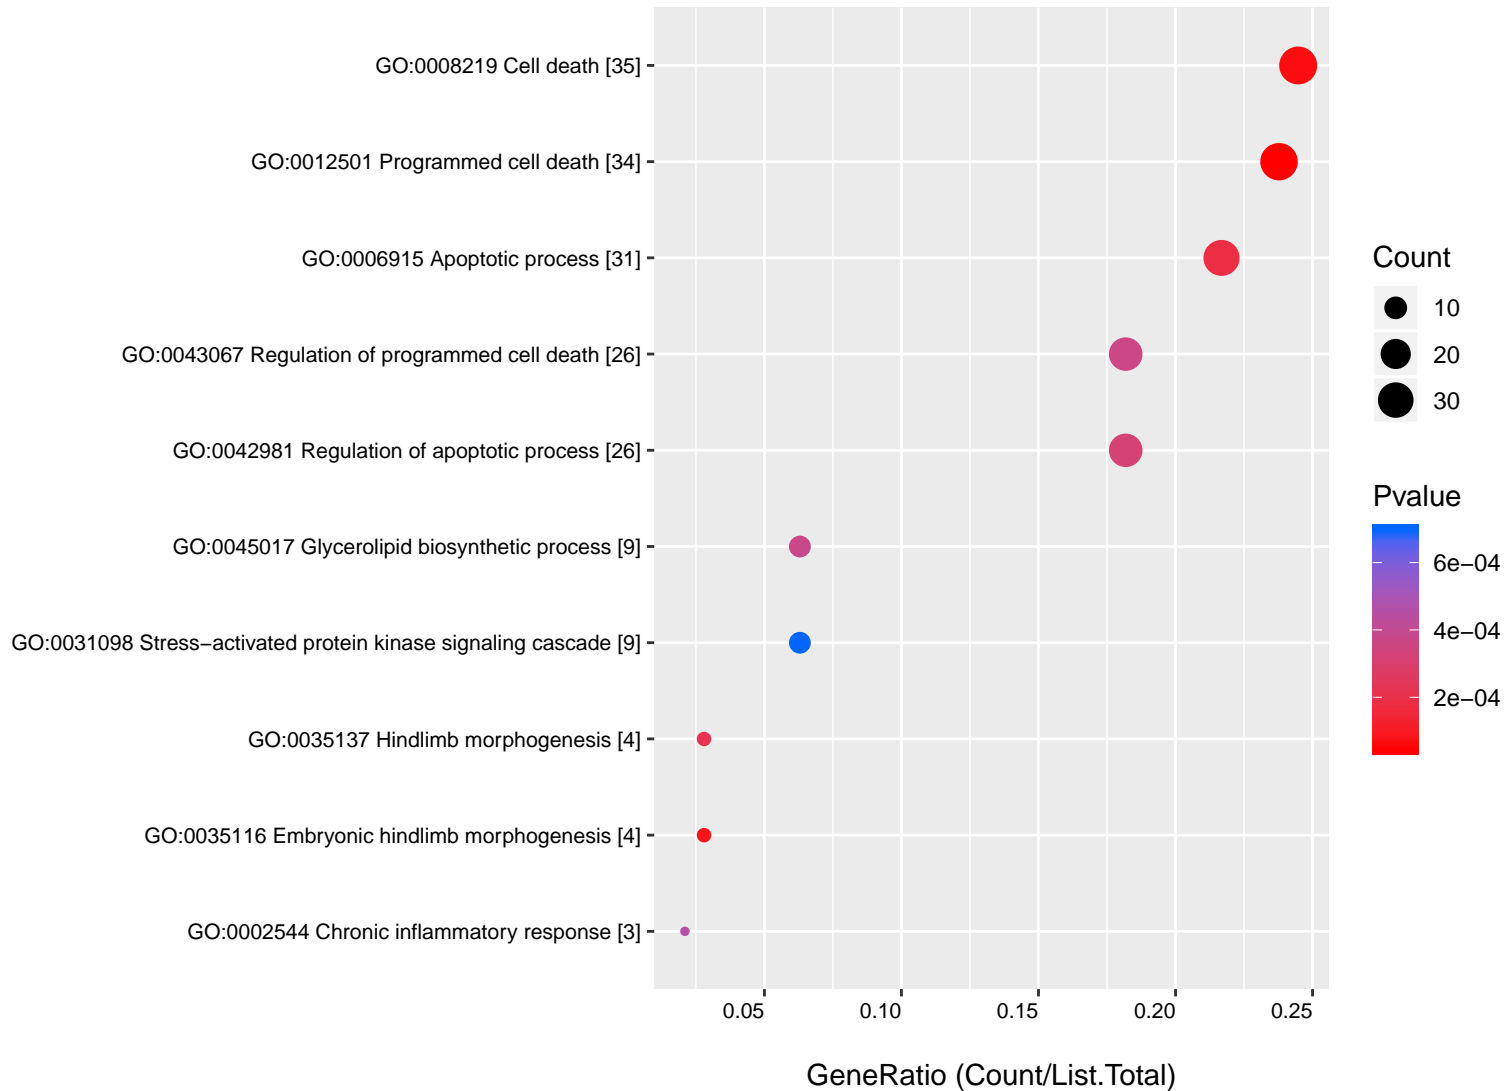

Supplement: s1 [file s1]

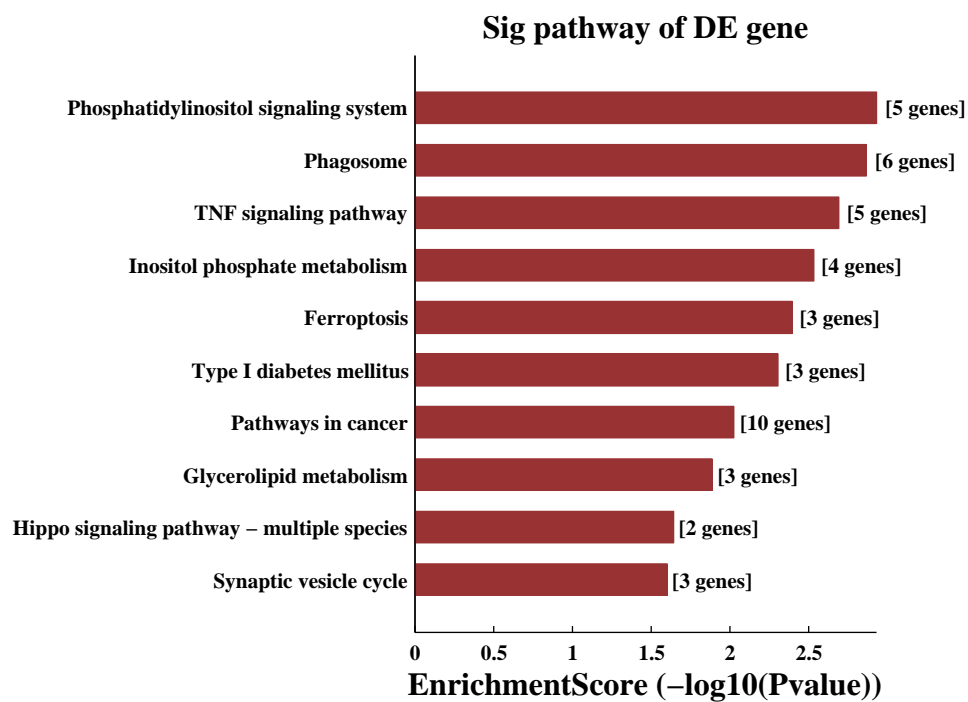

Supplement: s1 [file s1]

## Sig GO terms of DE gene-BP

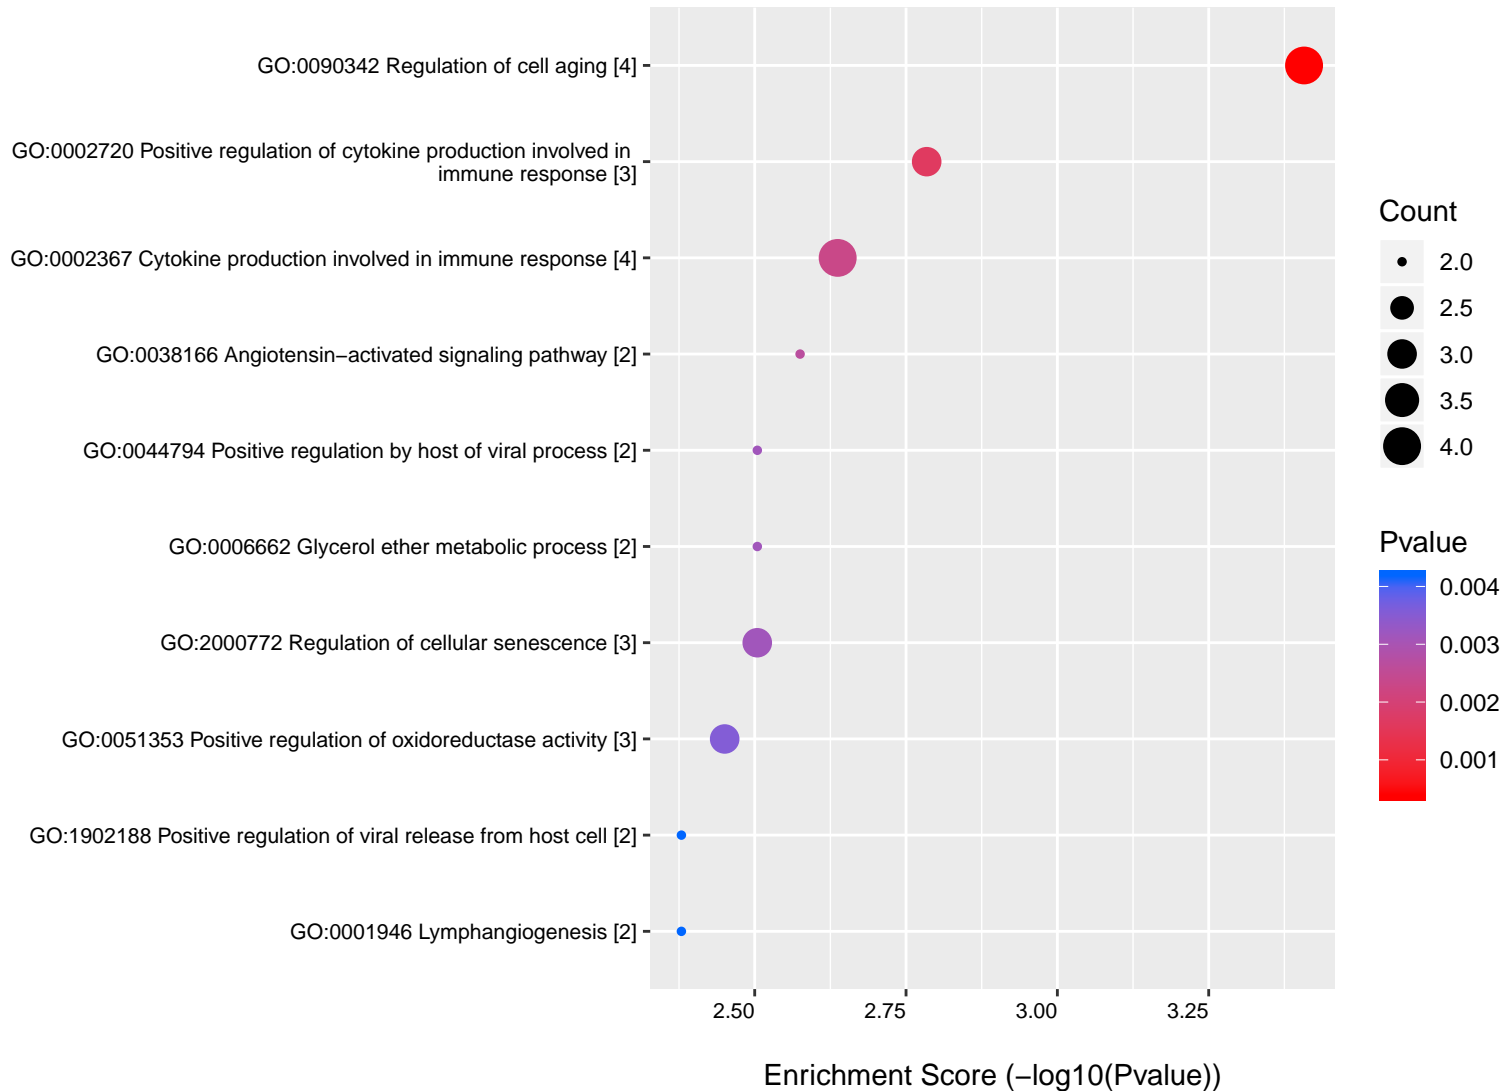

Supplement: s1 [file s1]

## Sig GO terms of DE gene-CC

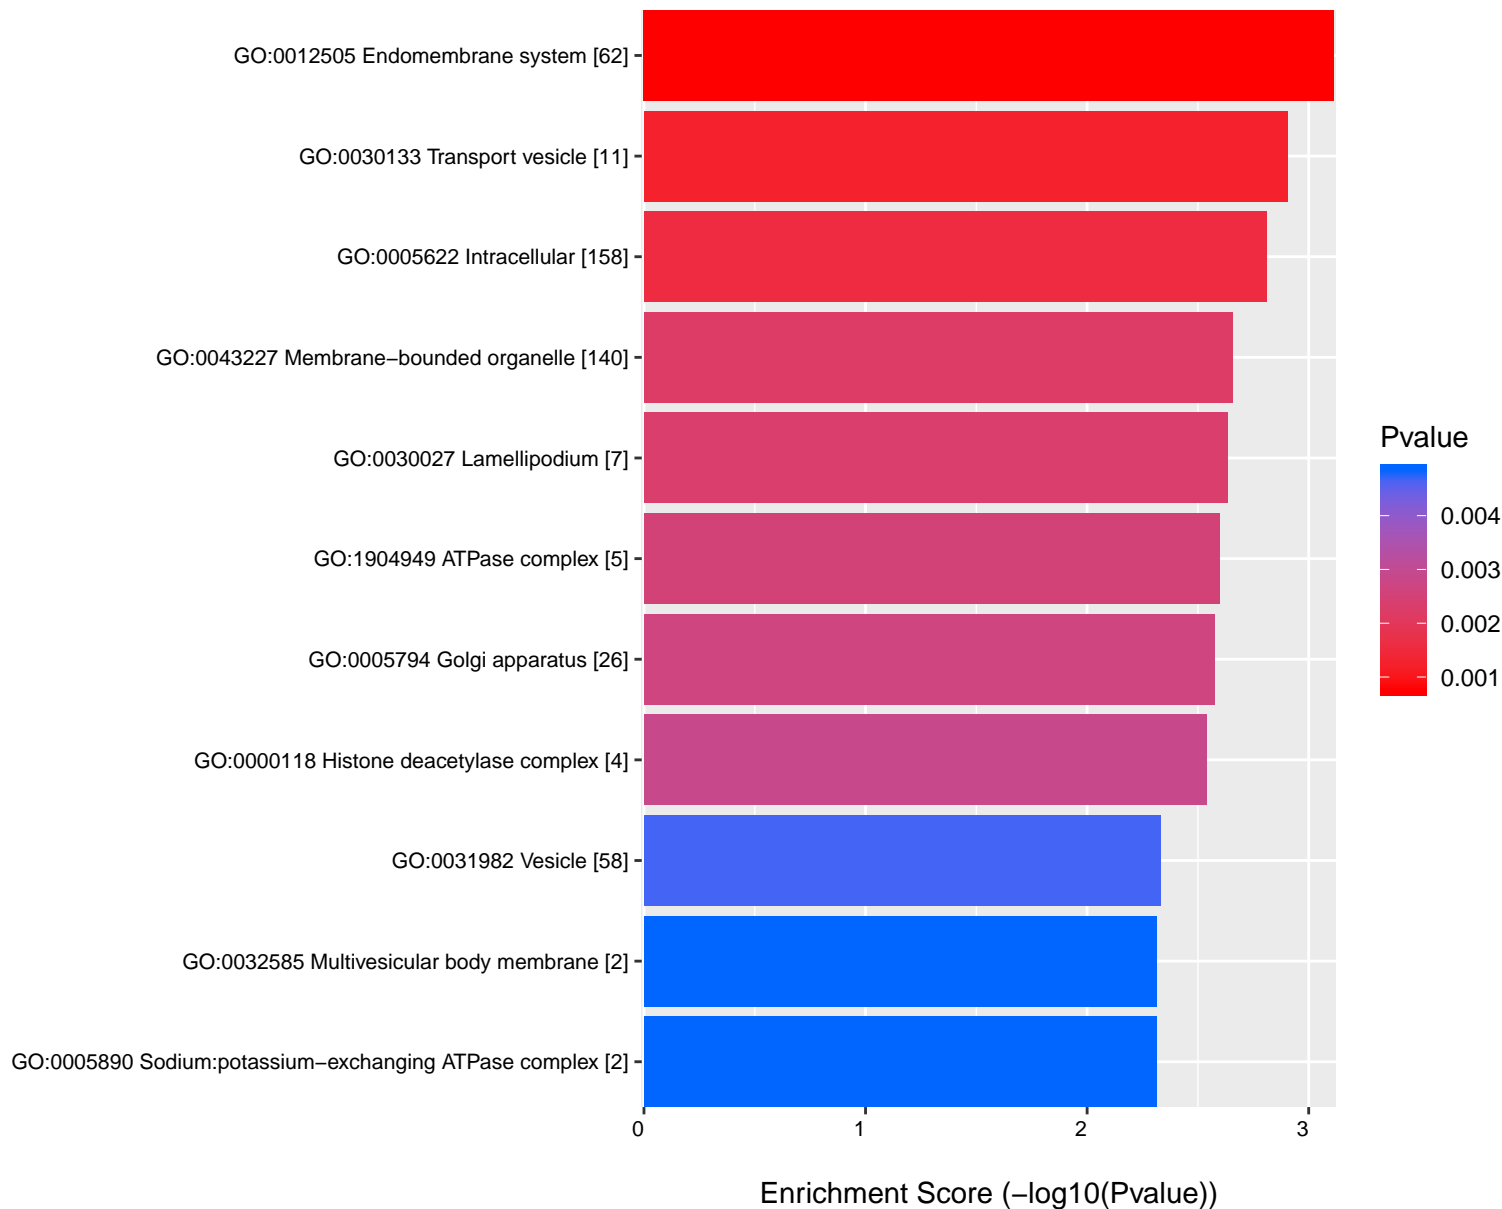

Supplement: s1 [file s1]

# Sig GO terms of DE gene-MF

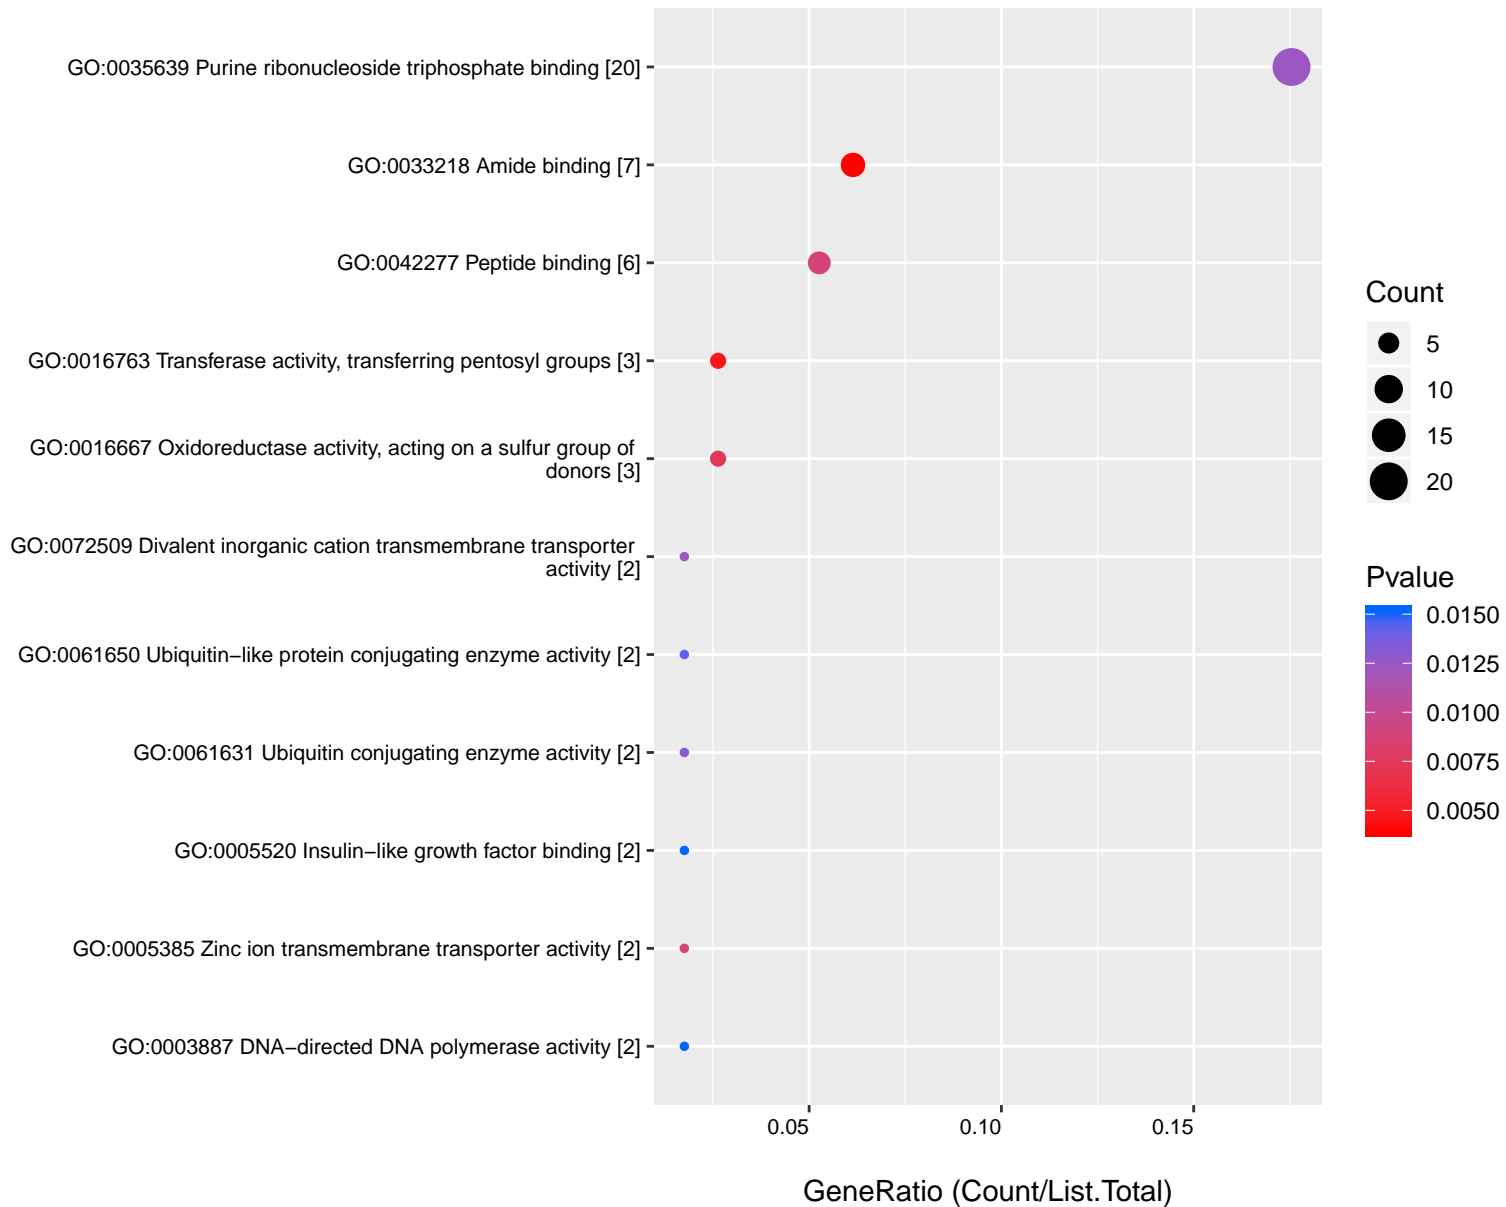

Supplement: s1 [file s1]

# Sig GO terms of DE gene-CC

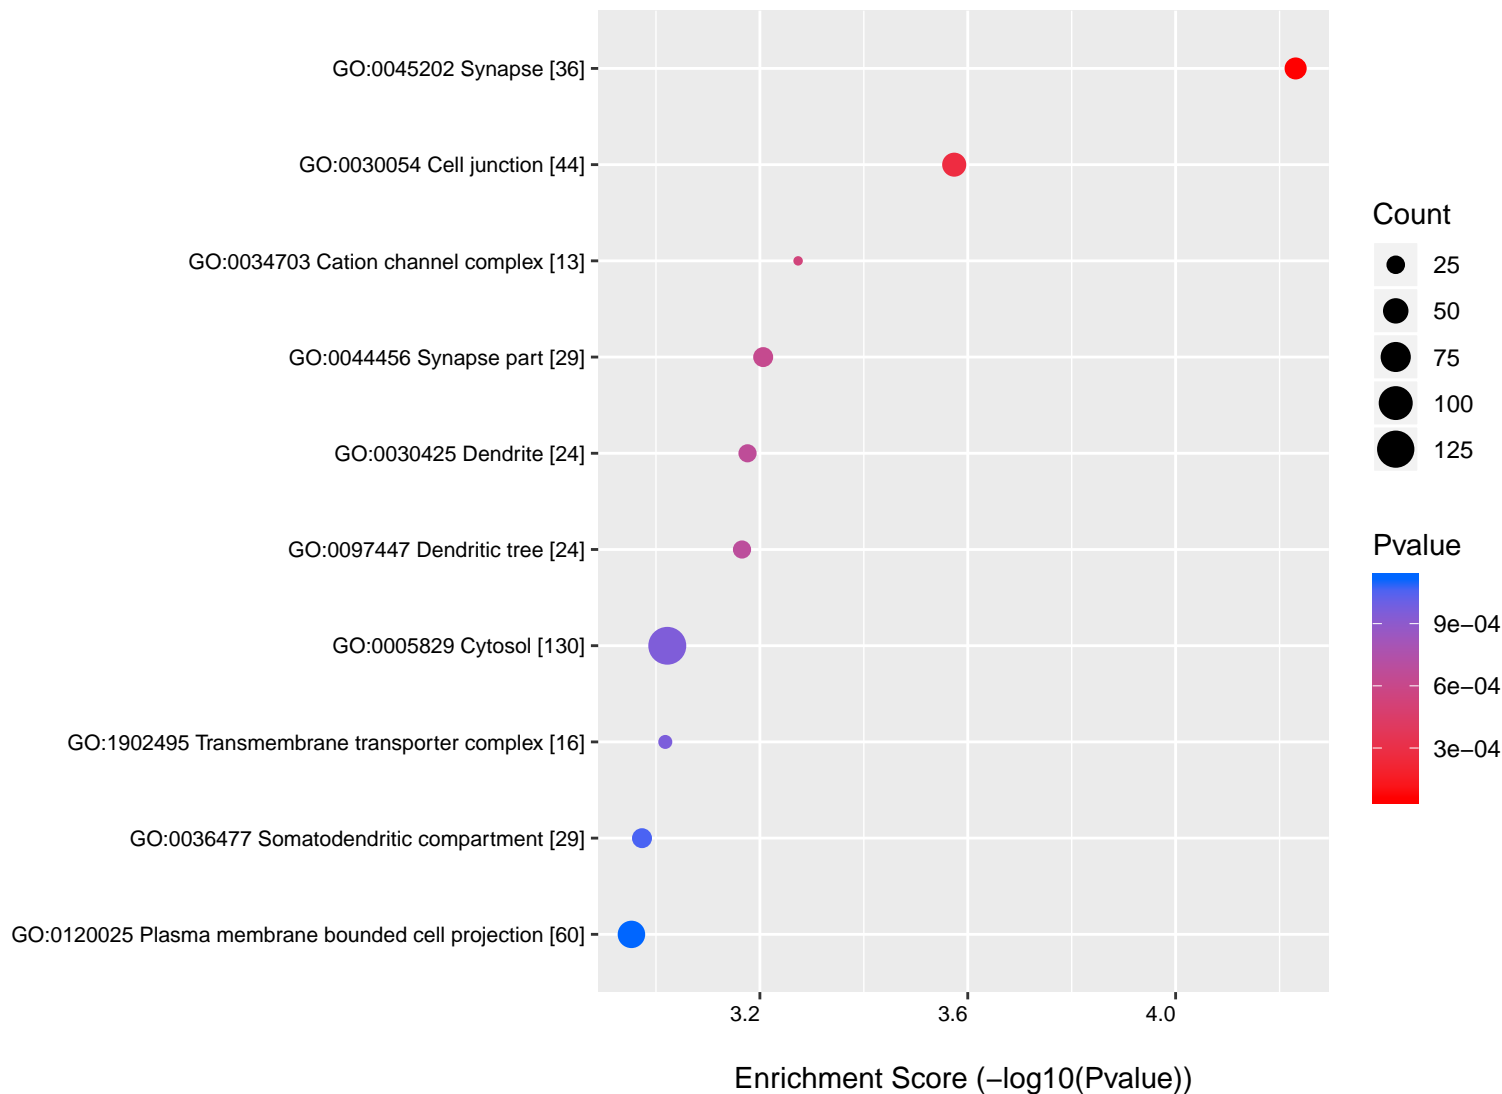

Supplement: s1 [file s1]

## Sig GO terms of DE gene-CC

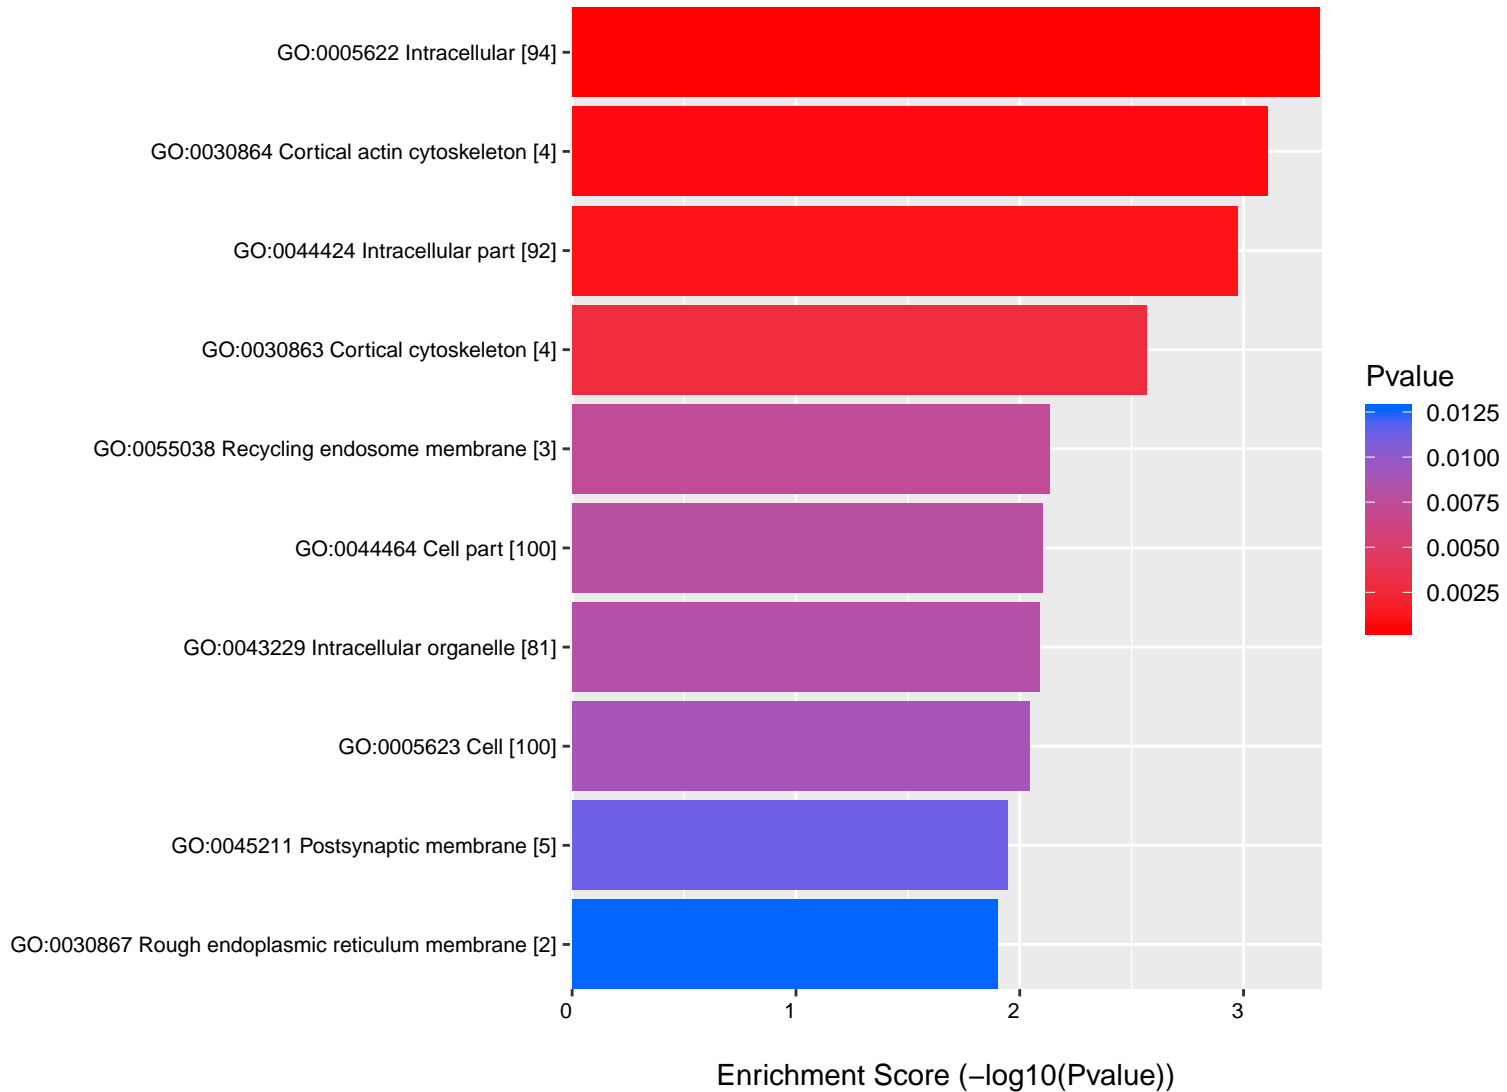

Supplement: s1 [file s1]

## Sig GO terms of DE gene-BP

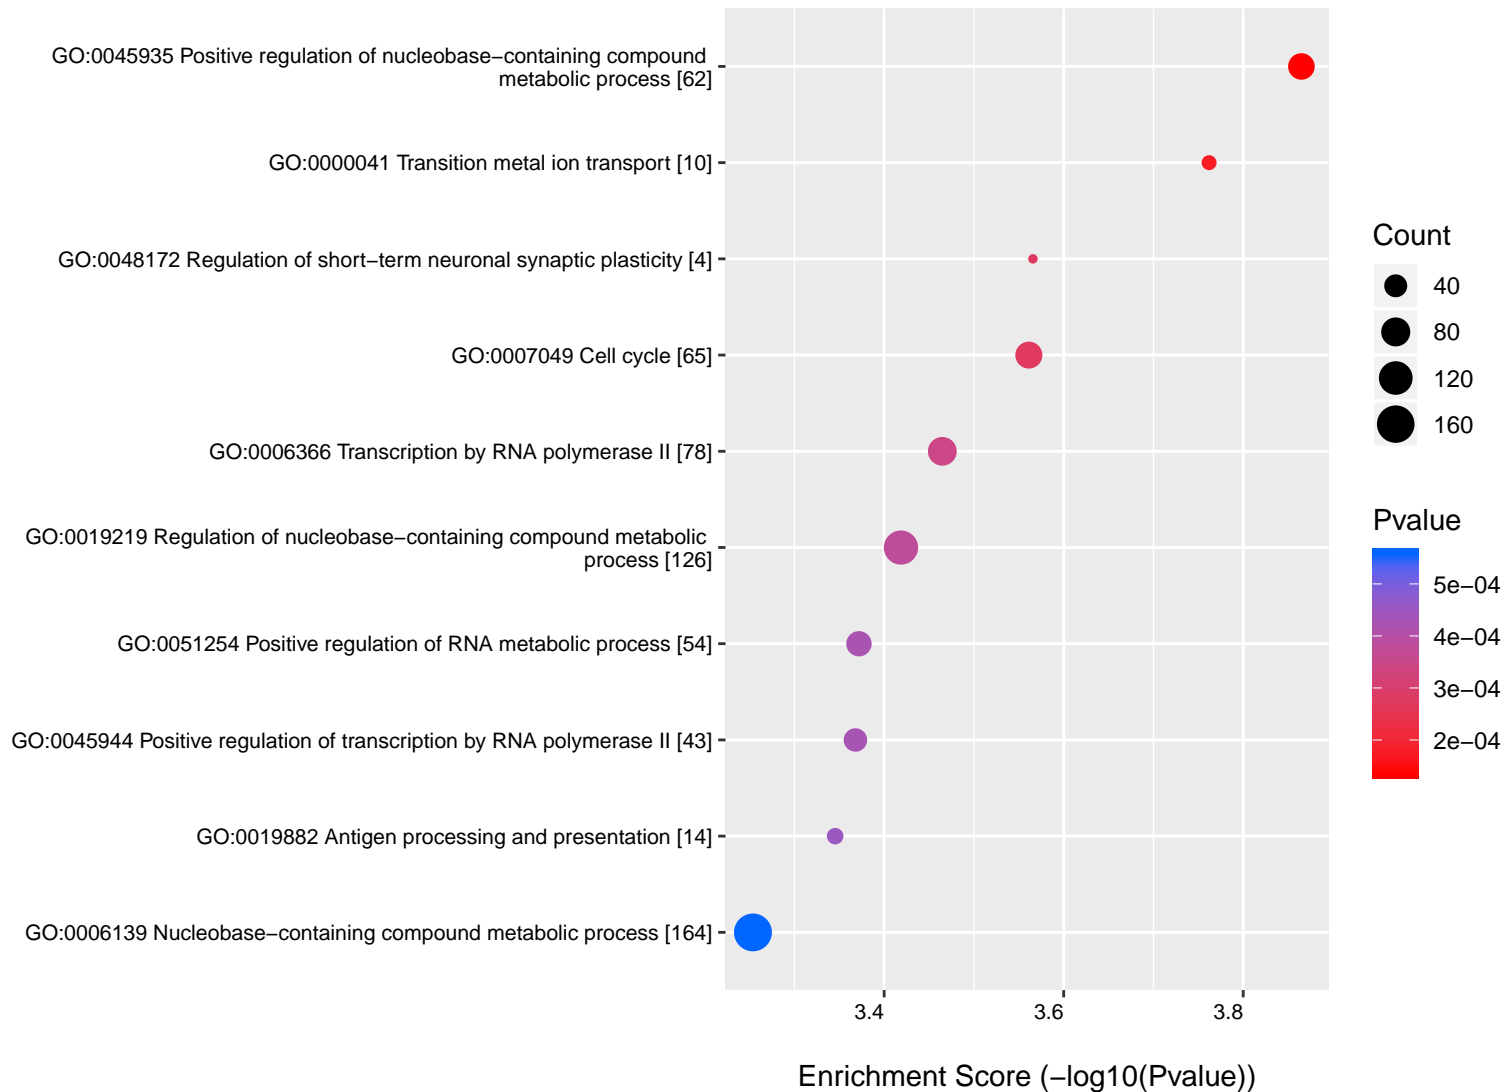

Supplement: s1 [file s1]

# Sig GO terms of DE gene-CC

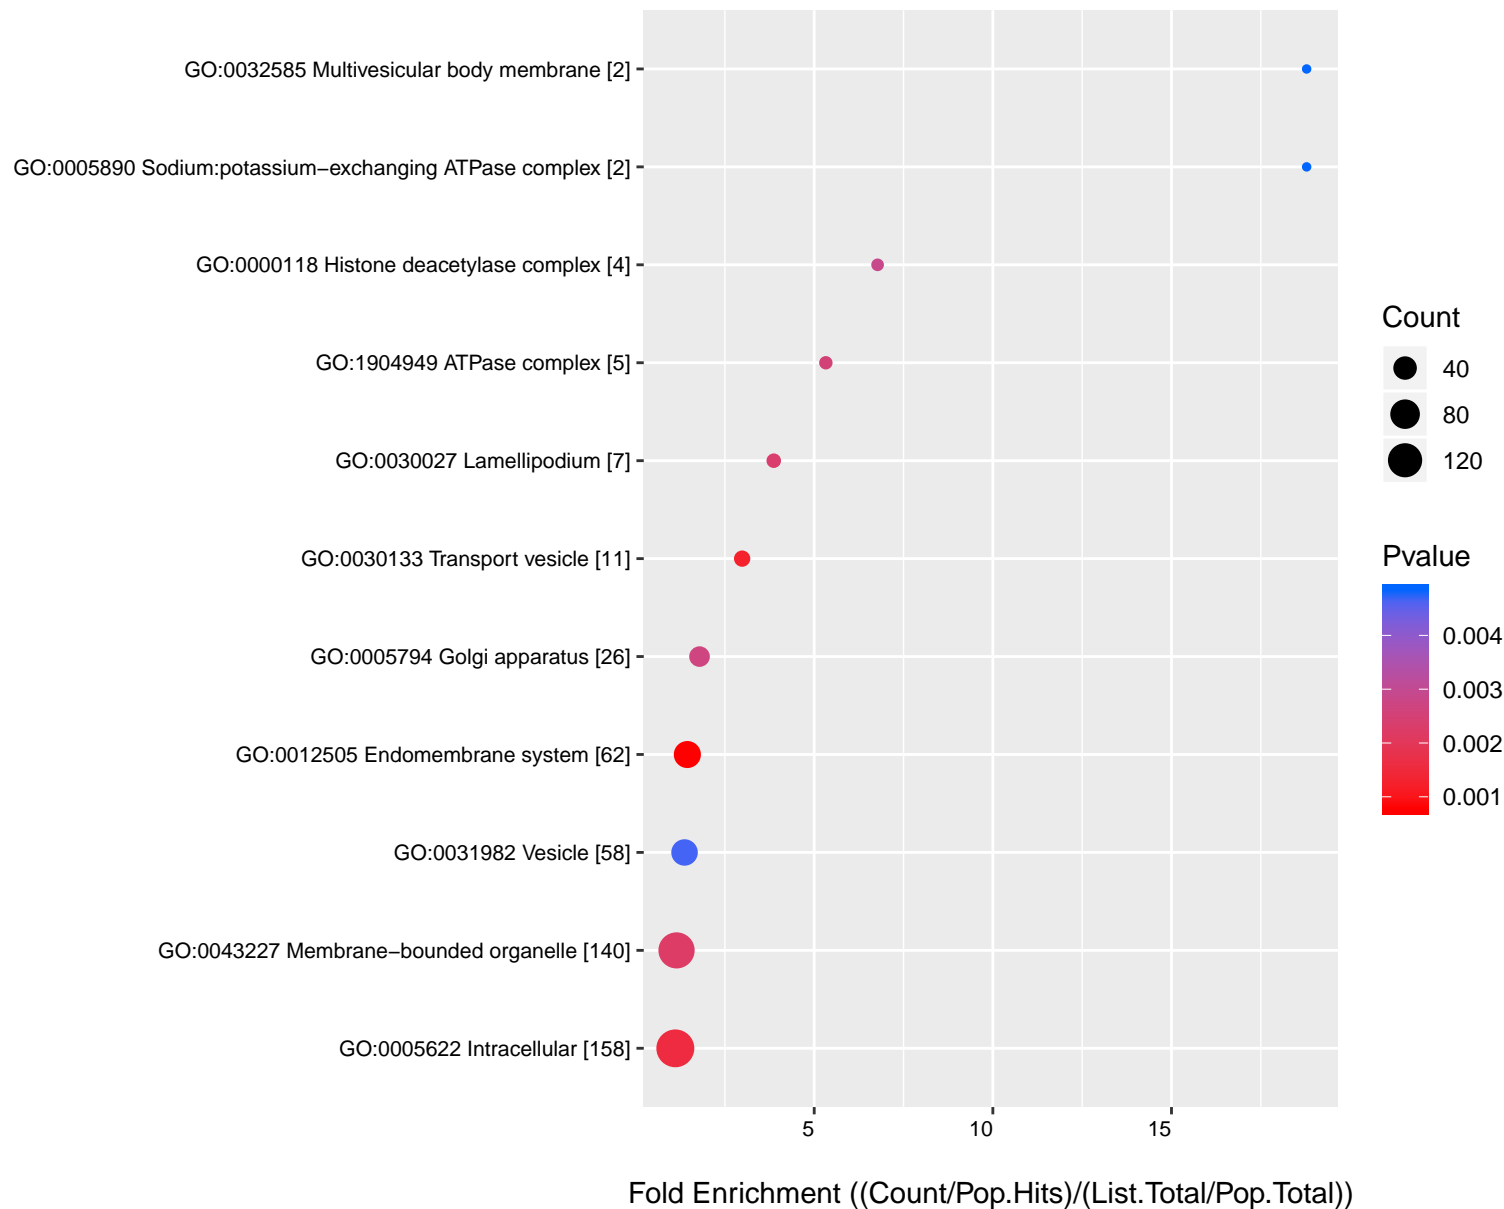

Supplement: s1 [file s1]

## Sig GO terms of DE gene-CC

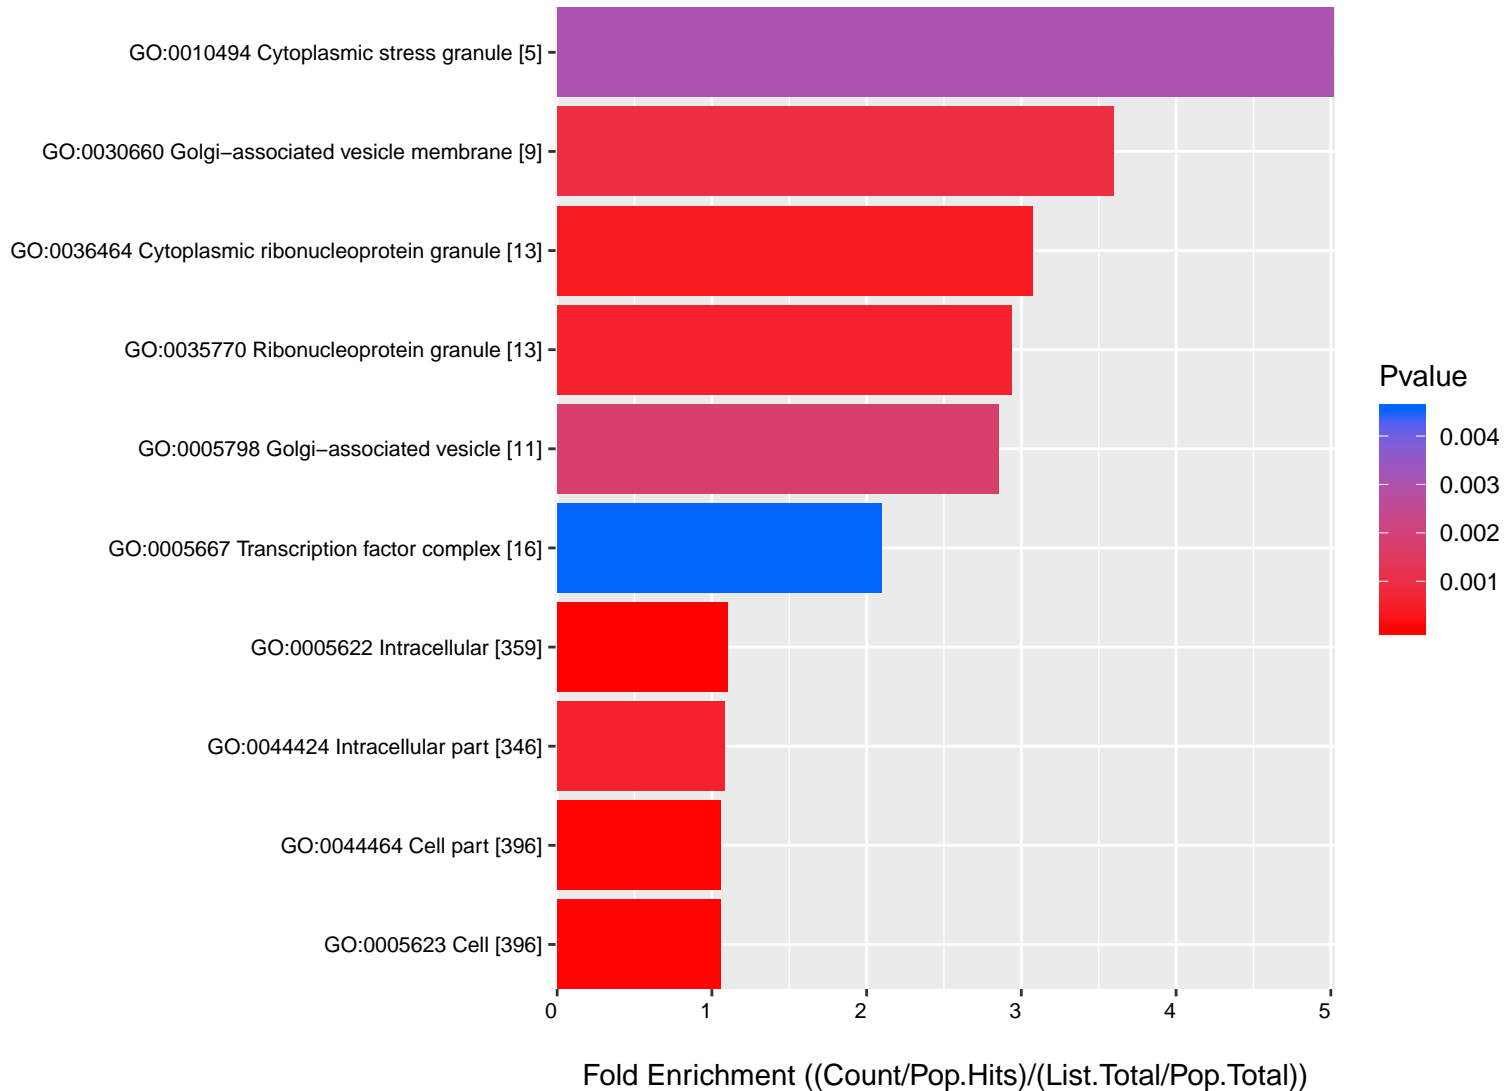

Supplement: s1 [file s1]

## Sig GO terms of DE gene-BP

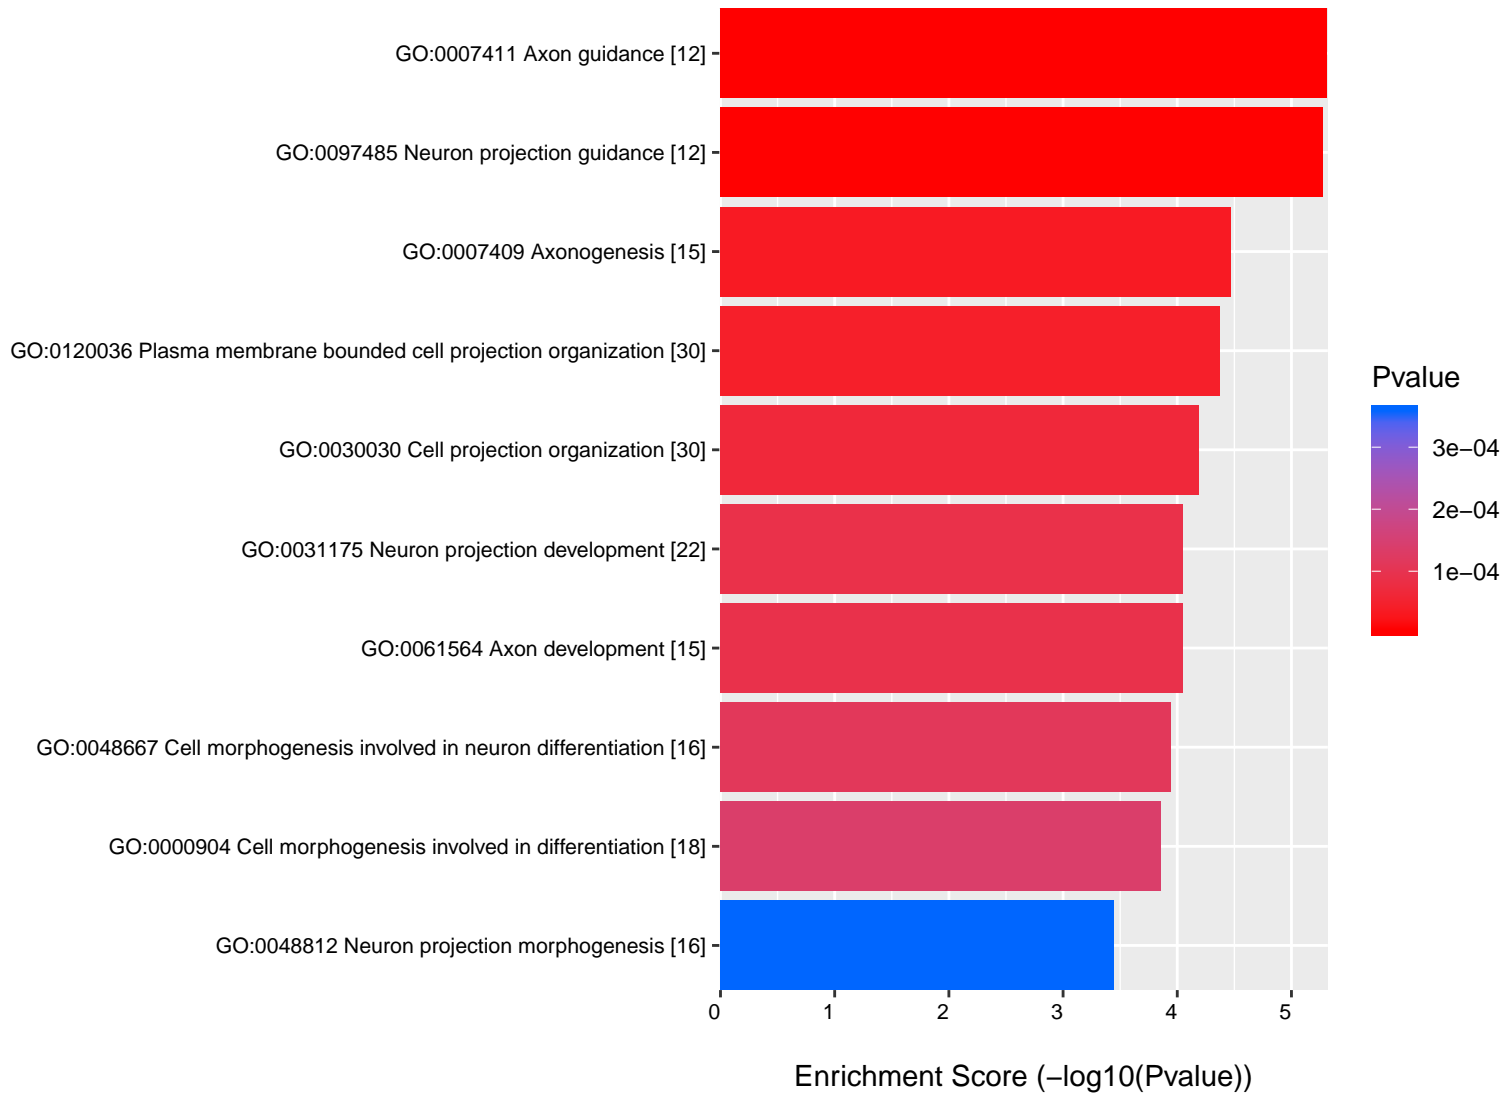

Supplement: s1 [file s1]

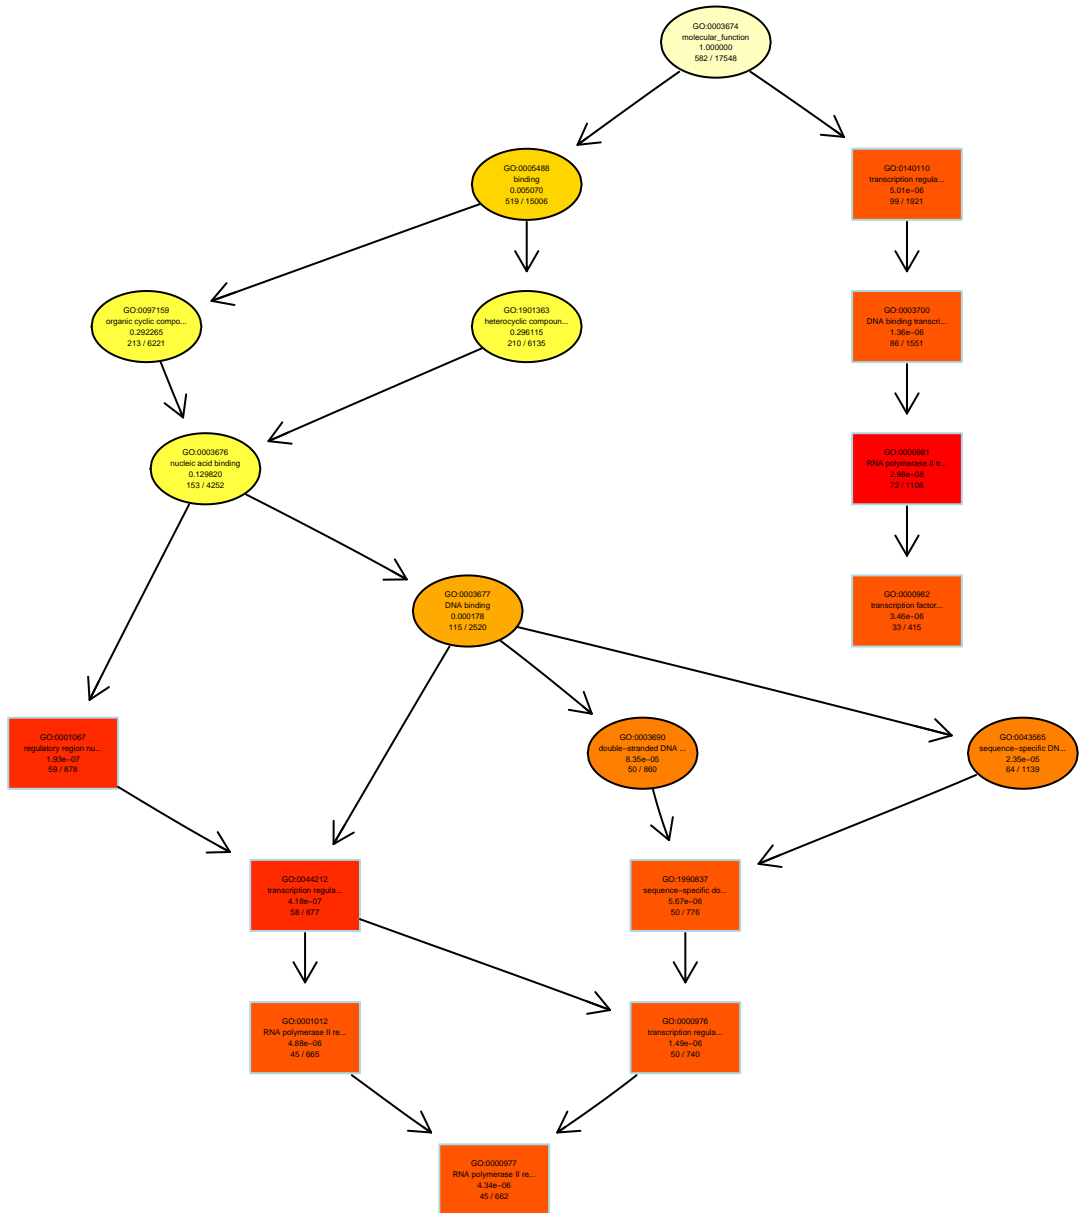

Supplement: s1 [file s1]

## Sig GO terms of DE gene-CC

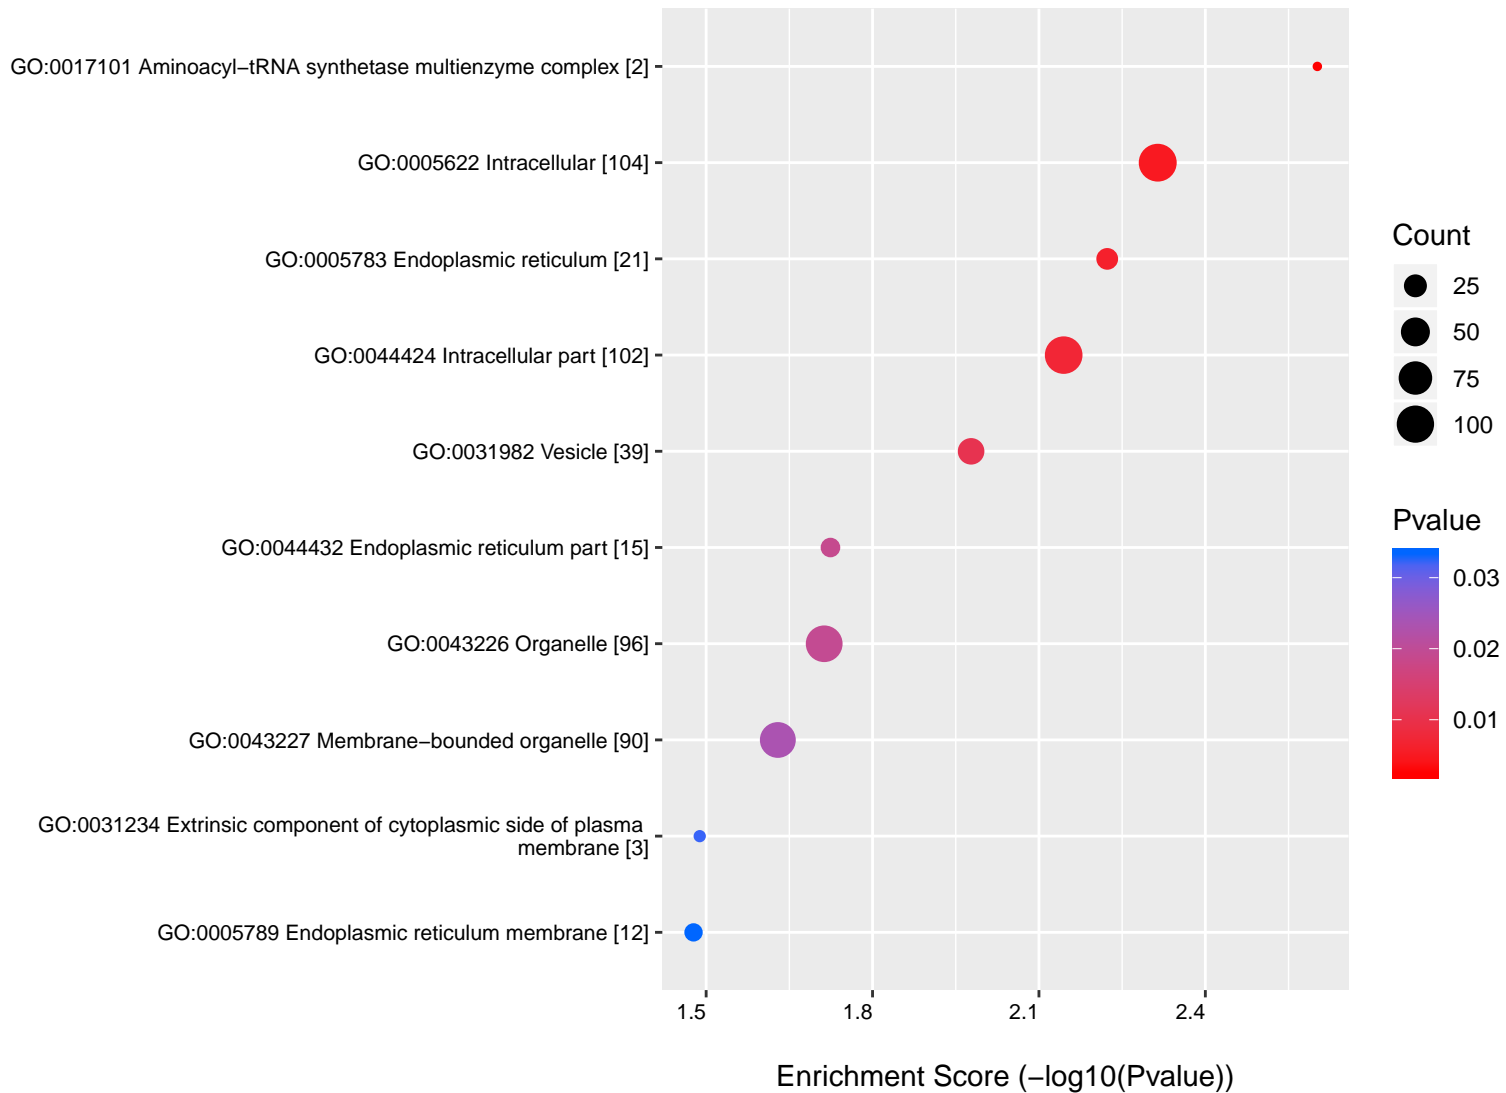

Supplement: s1 [file s1]

Sig GO terms of DE gene

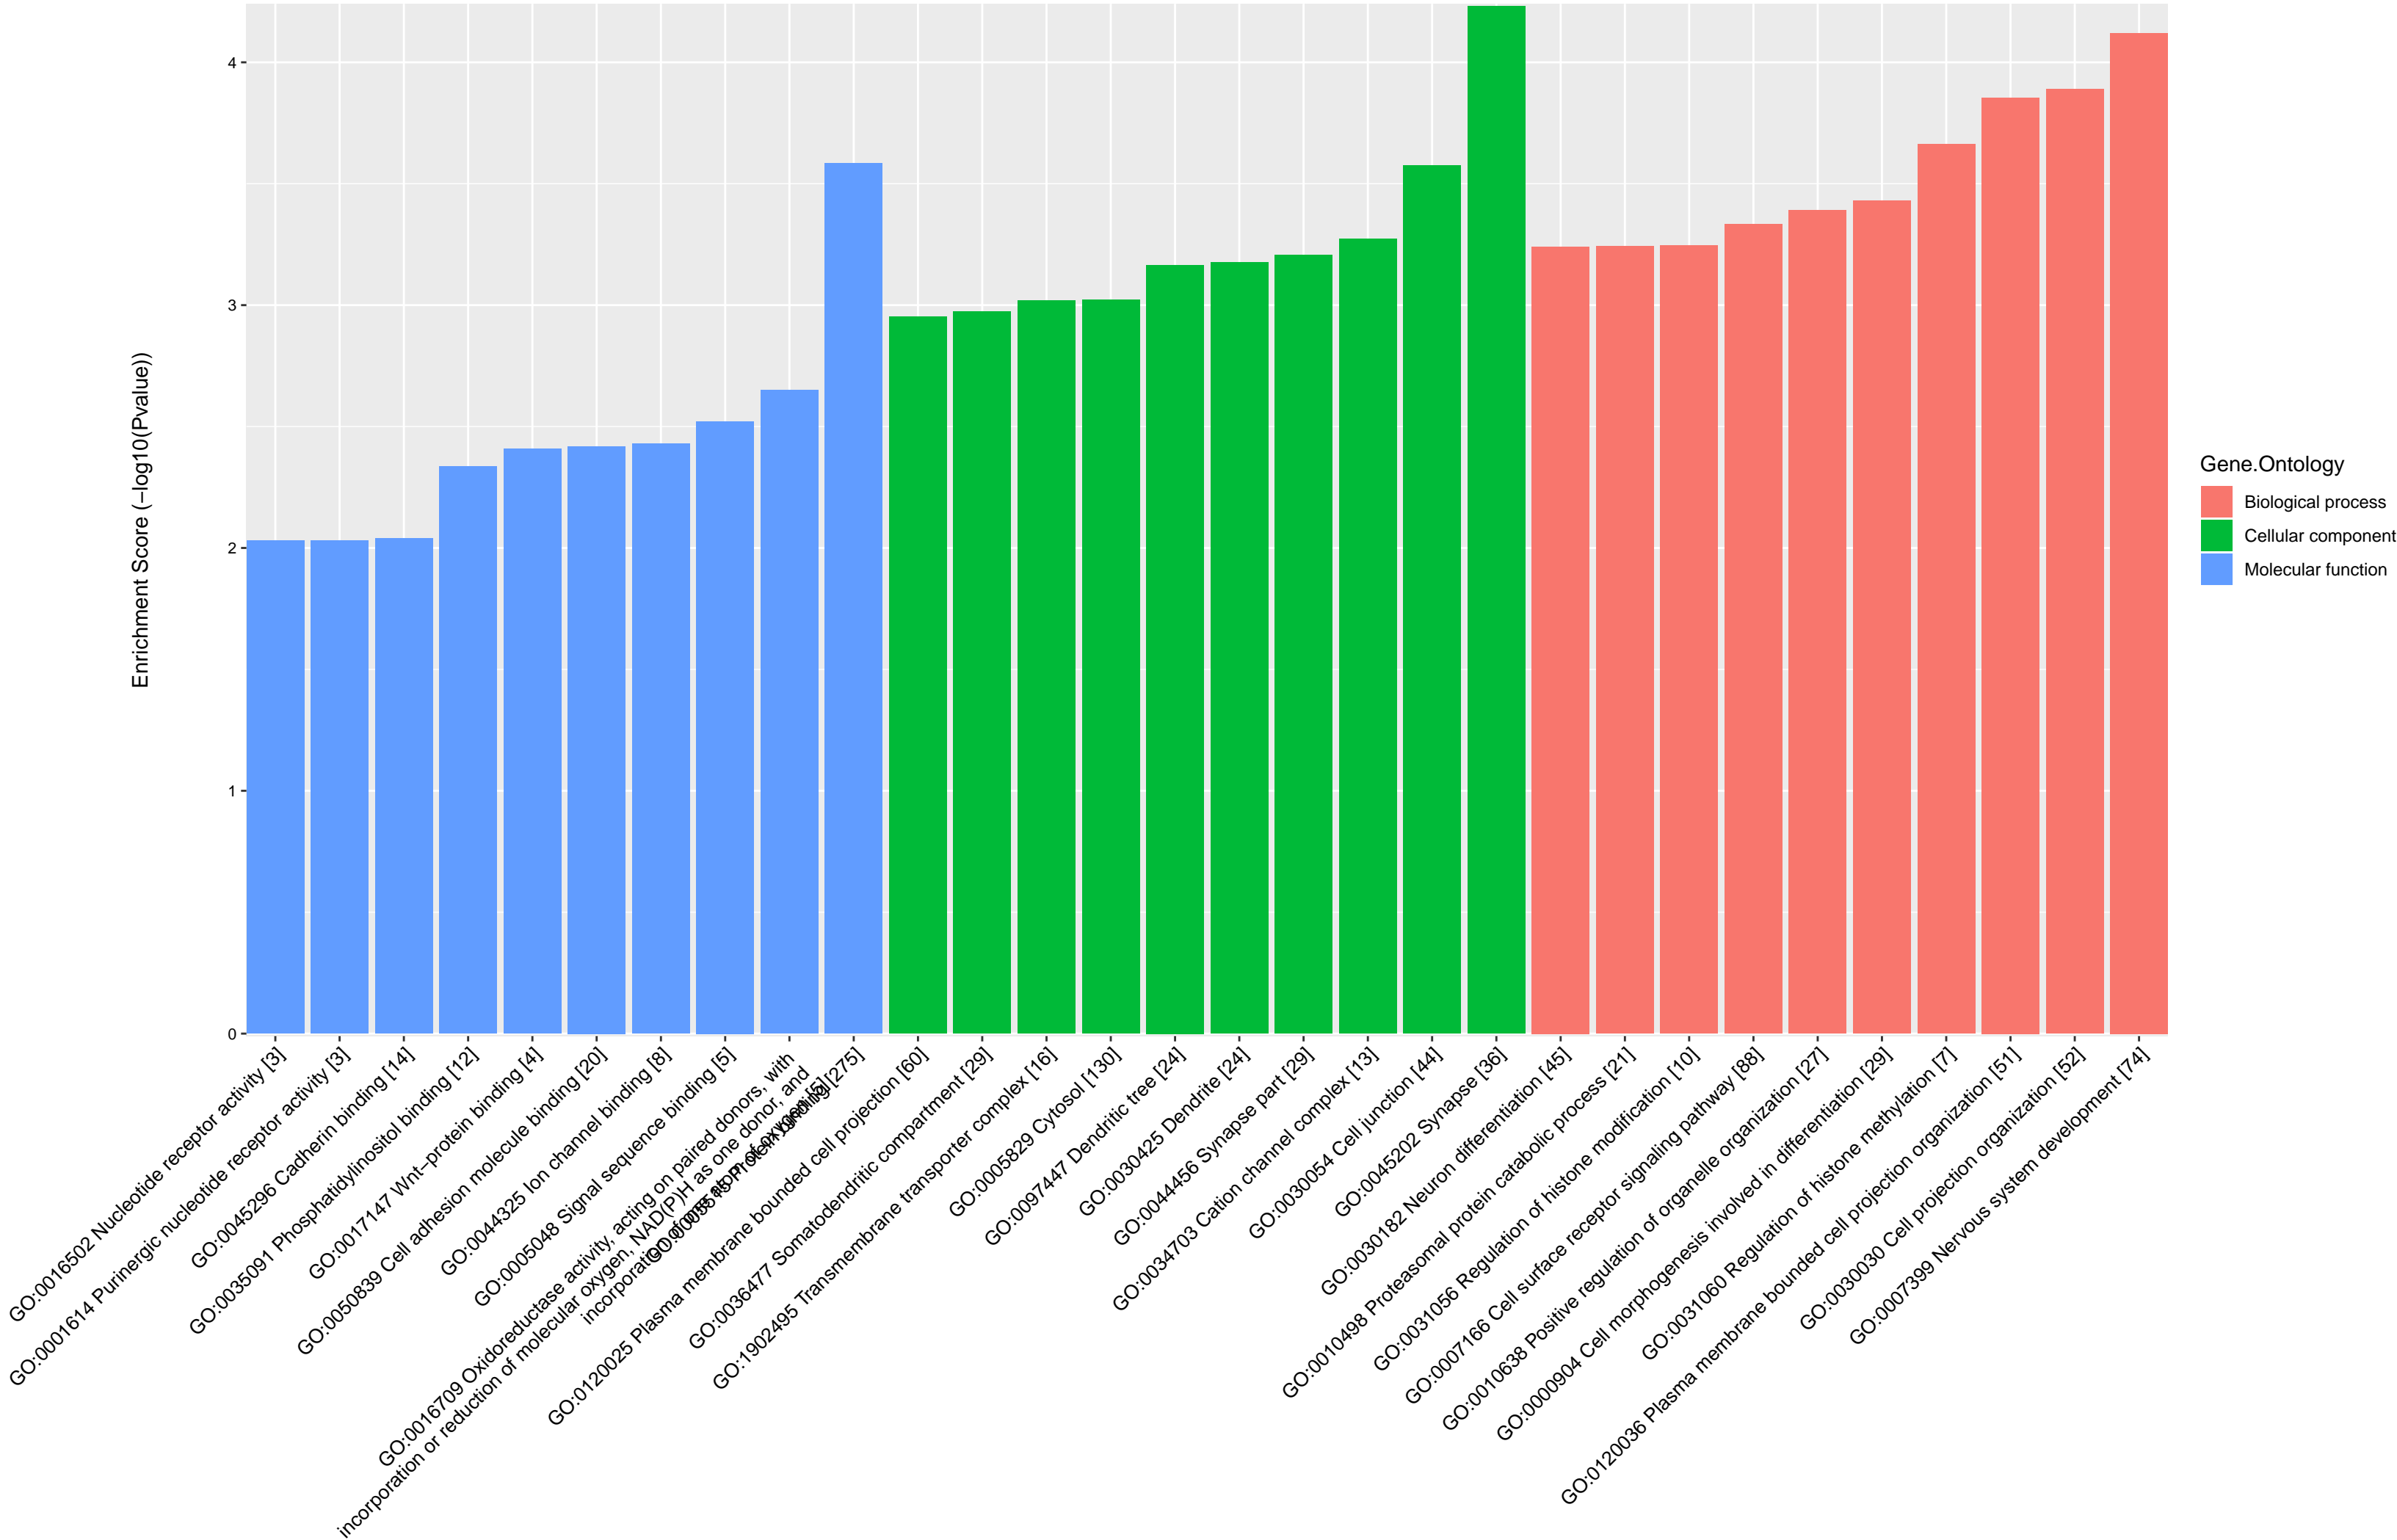

Supplement: s1 [file s1]

## Sig GO terms of DE gene-BP

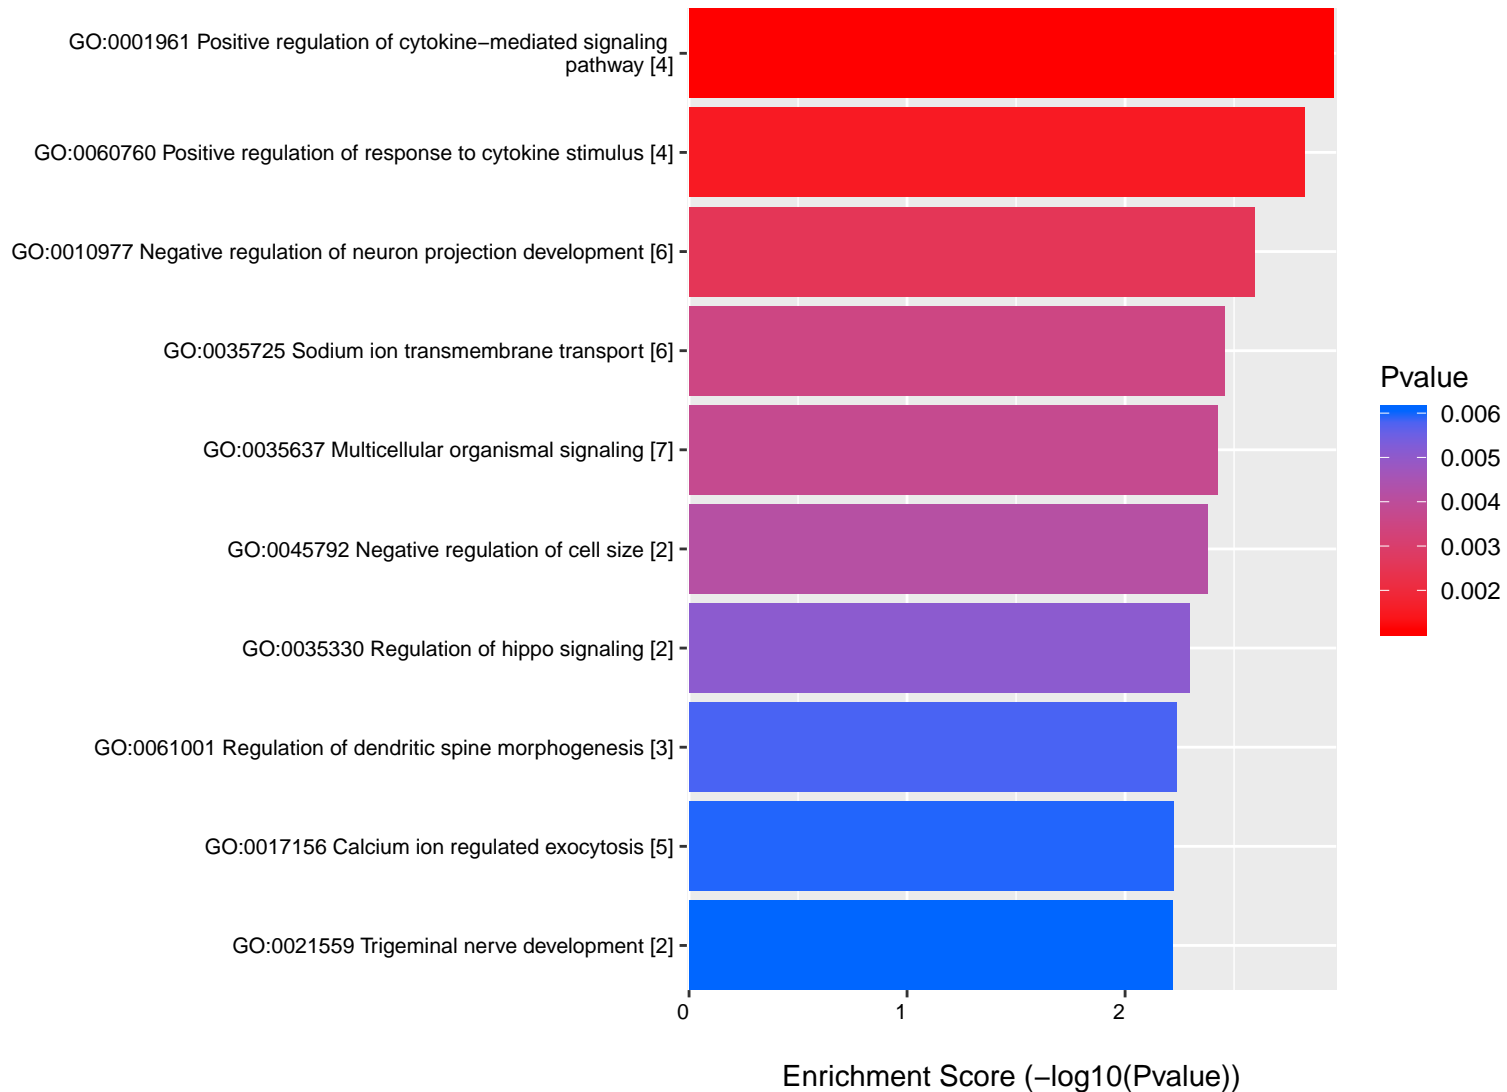

Supplement: s1 [file s1]

# Sig GO terms of DE gene-MF

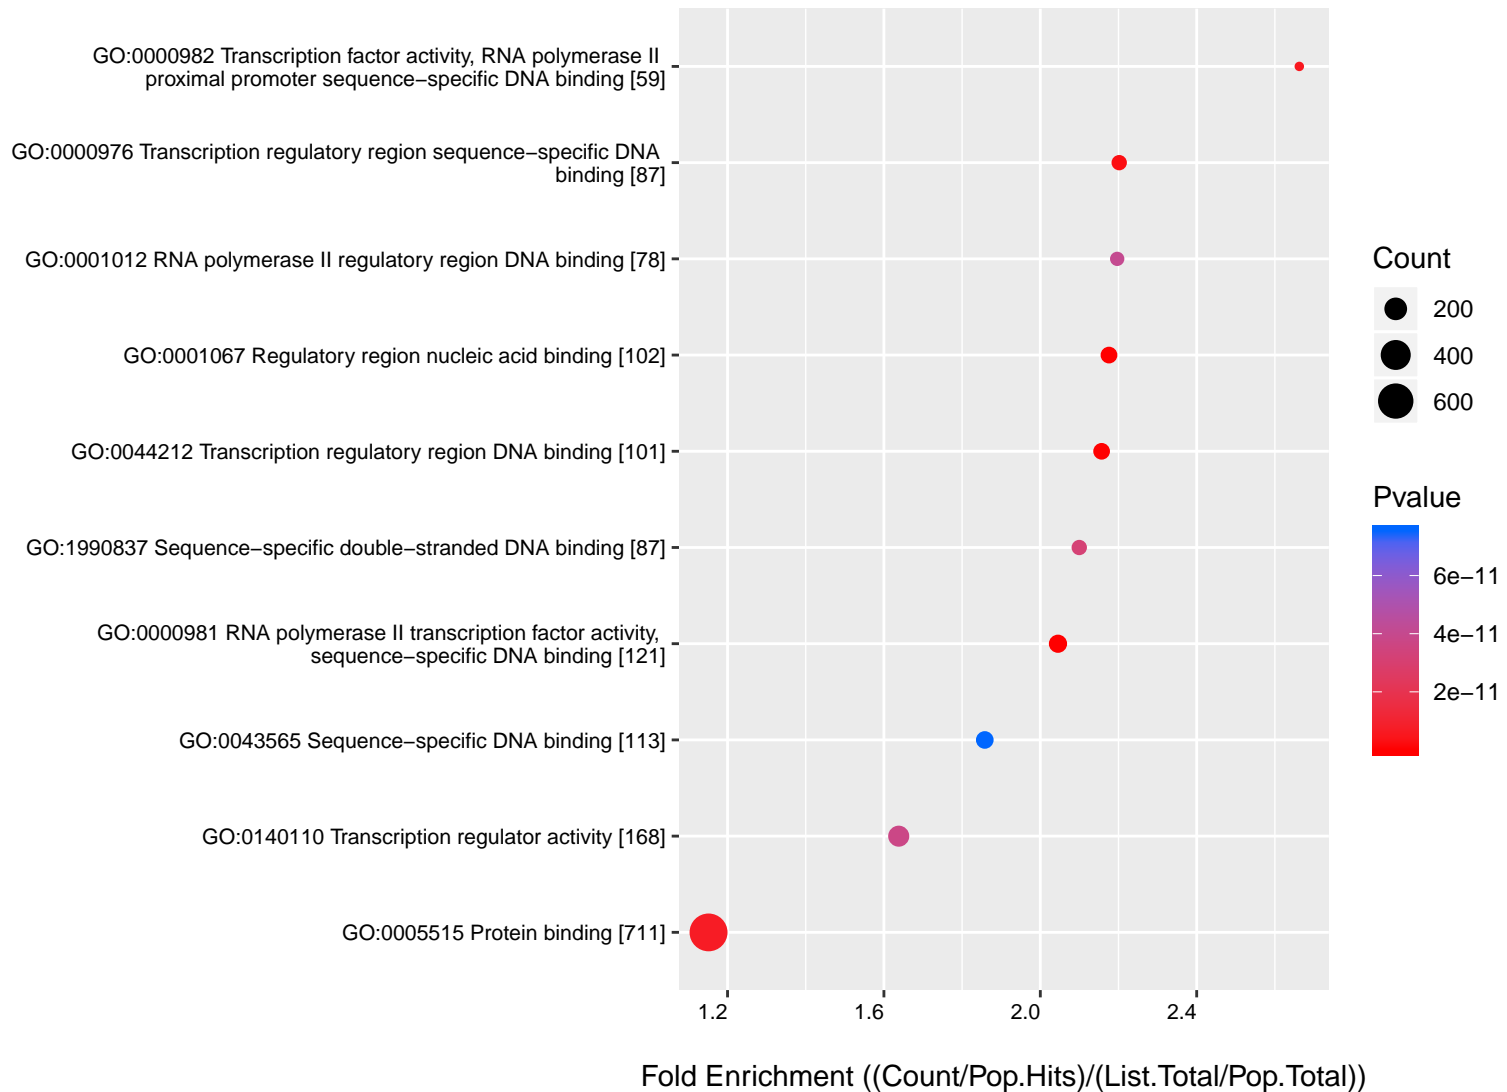

Supplement: s1 [file s1]

# Sig GO terms of DE gene-MF

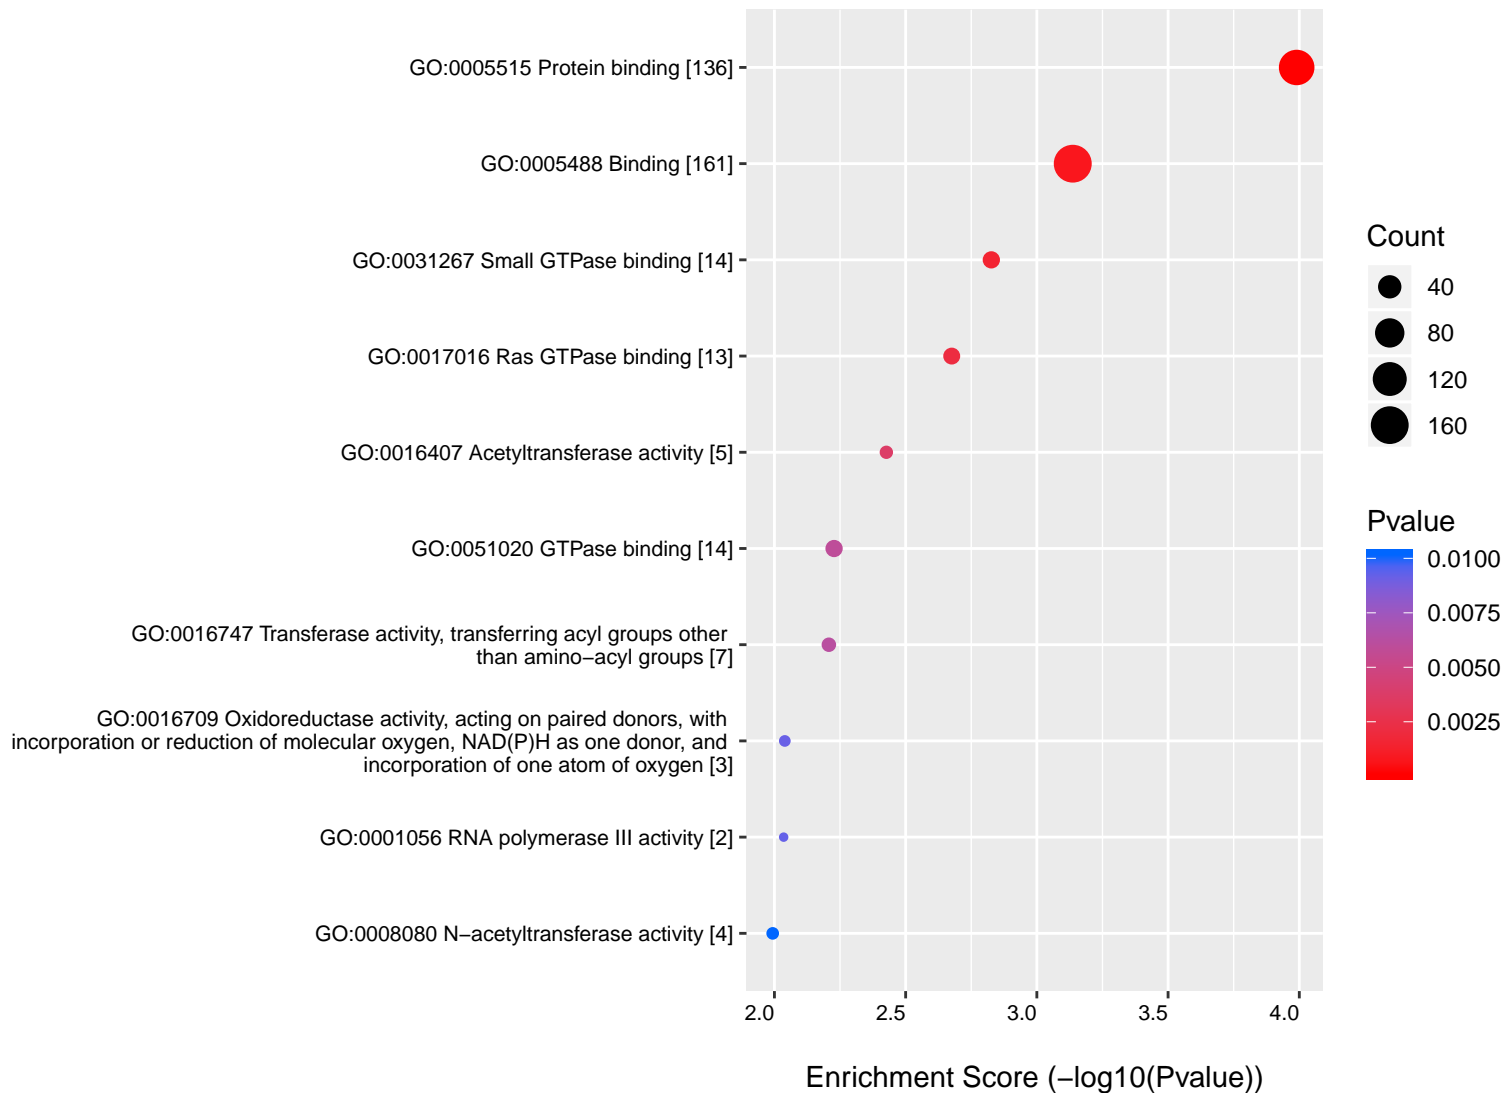

Supplement: s1 [file s1]

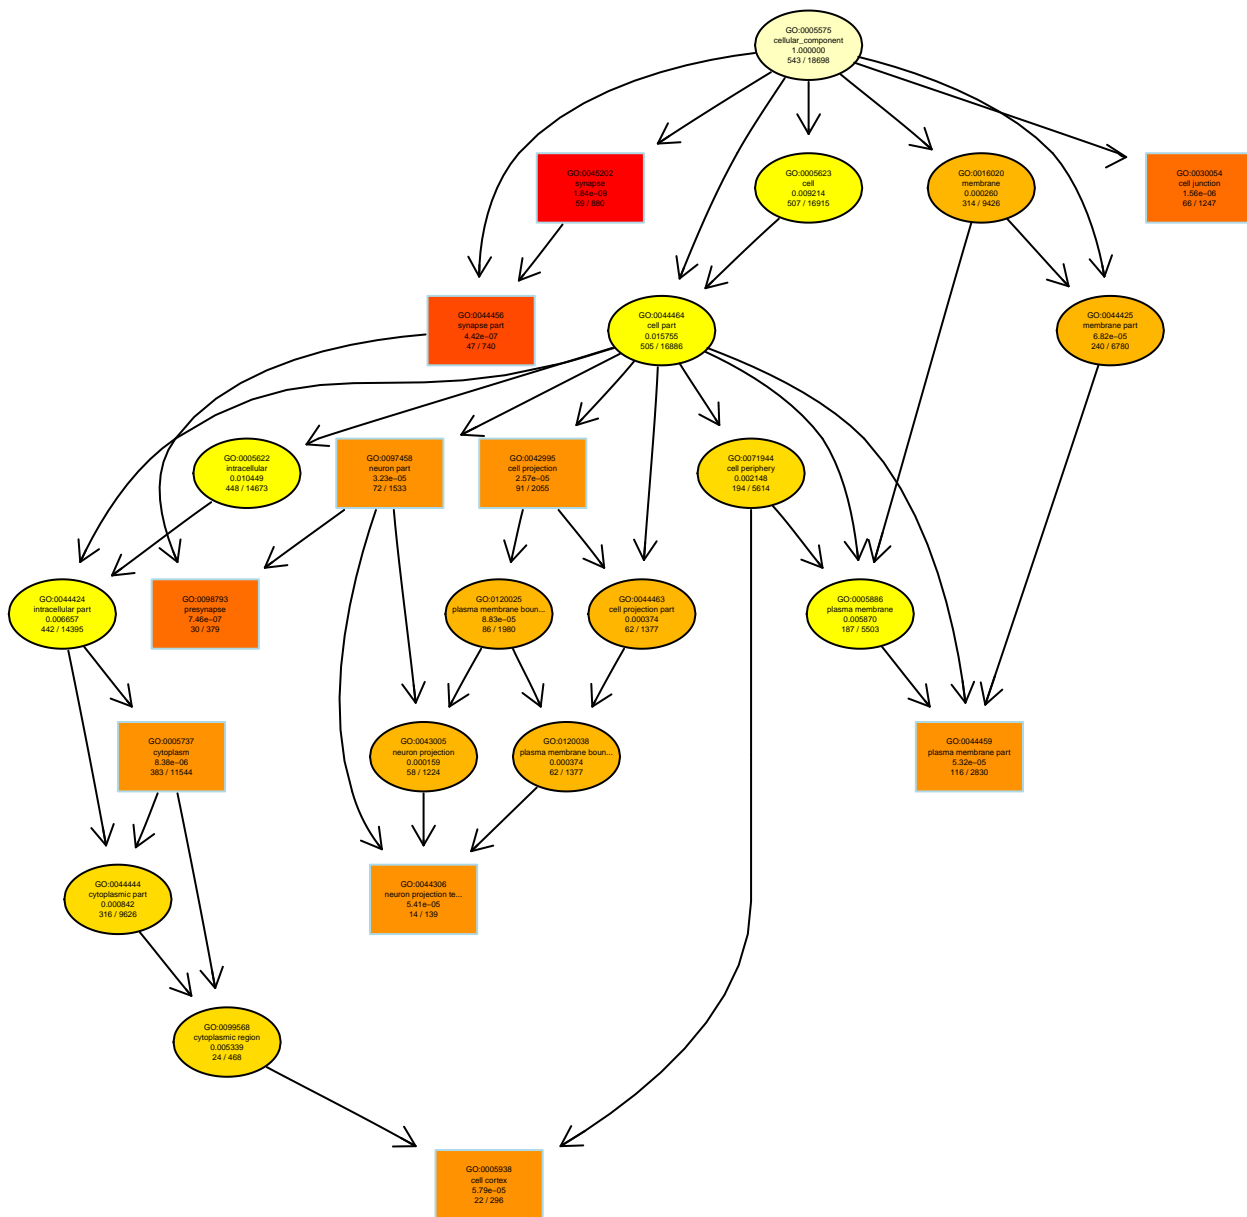

Supplement: s1 [file s1]

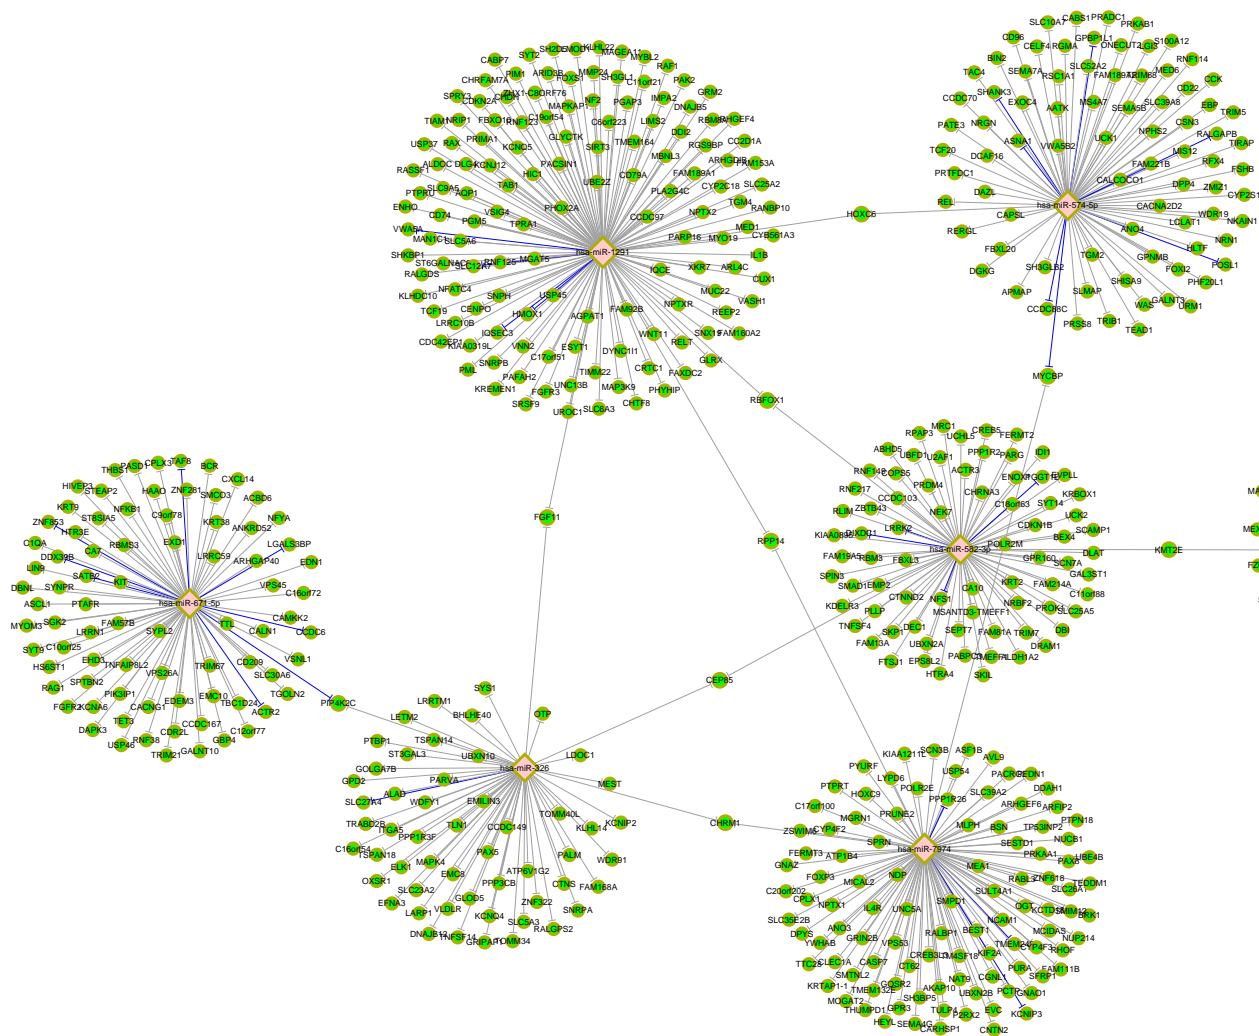

Supplement: s1 [file s1]

# Sig GO terms of DE gene-CC

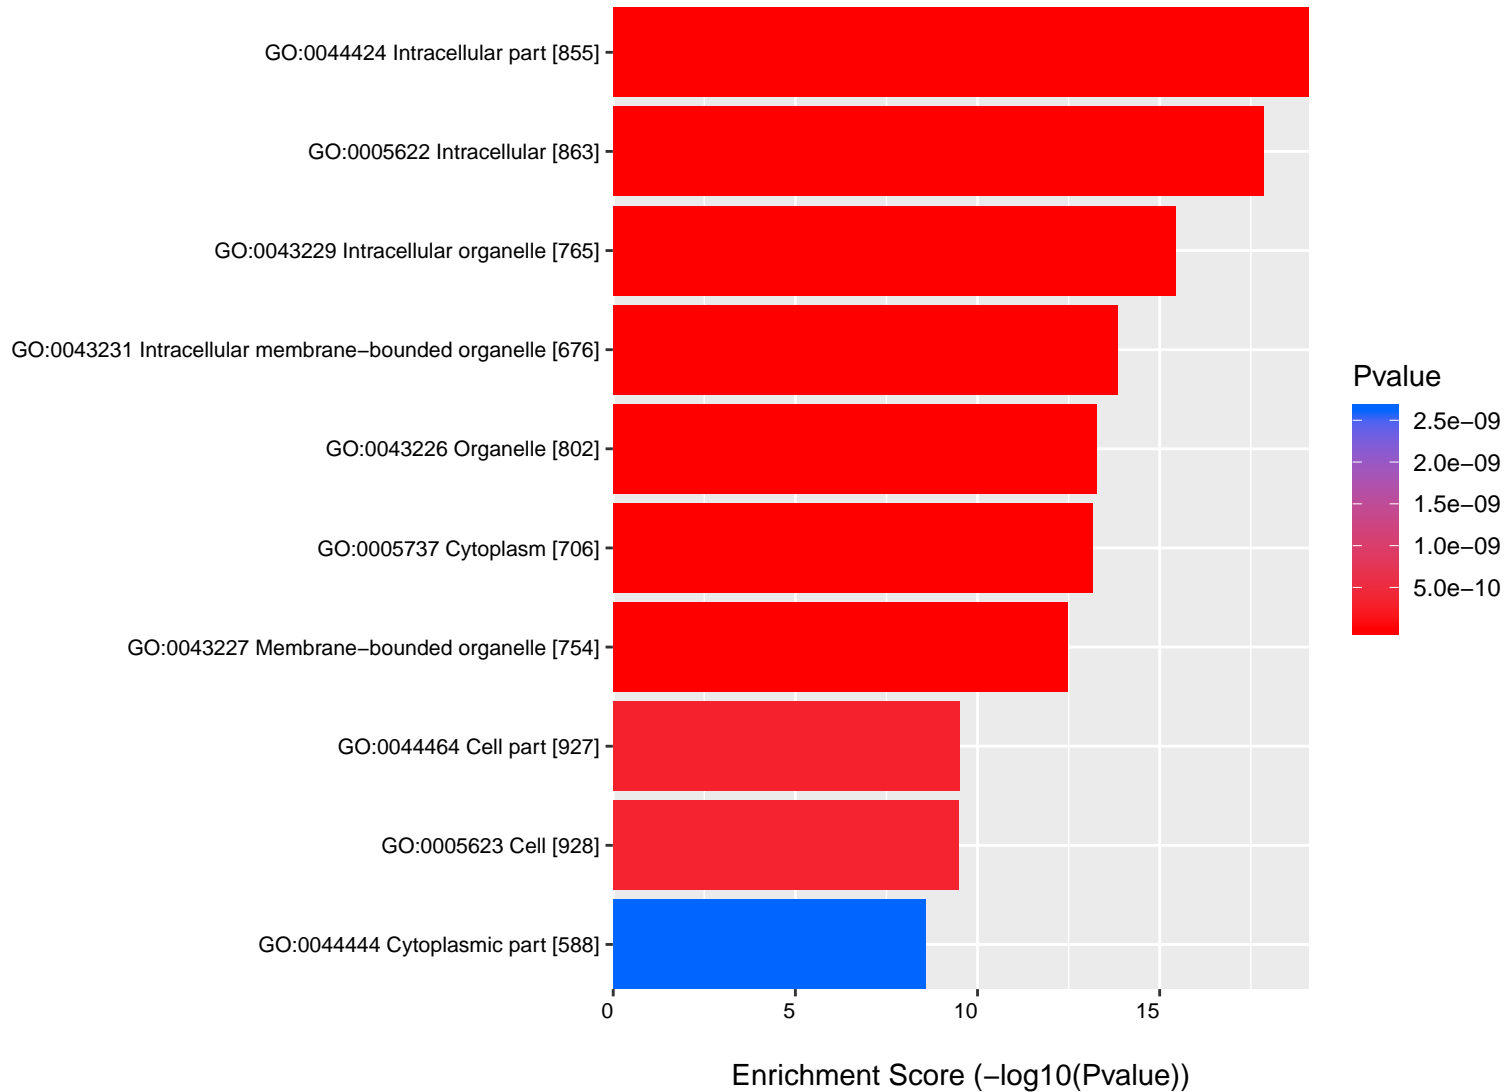

Supplement: s1 [file s1]

## Sig GO terms of DE gene-BP

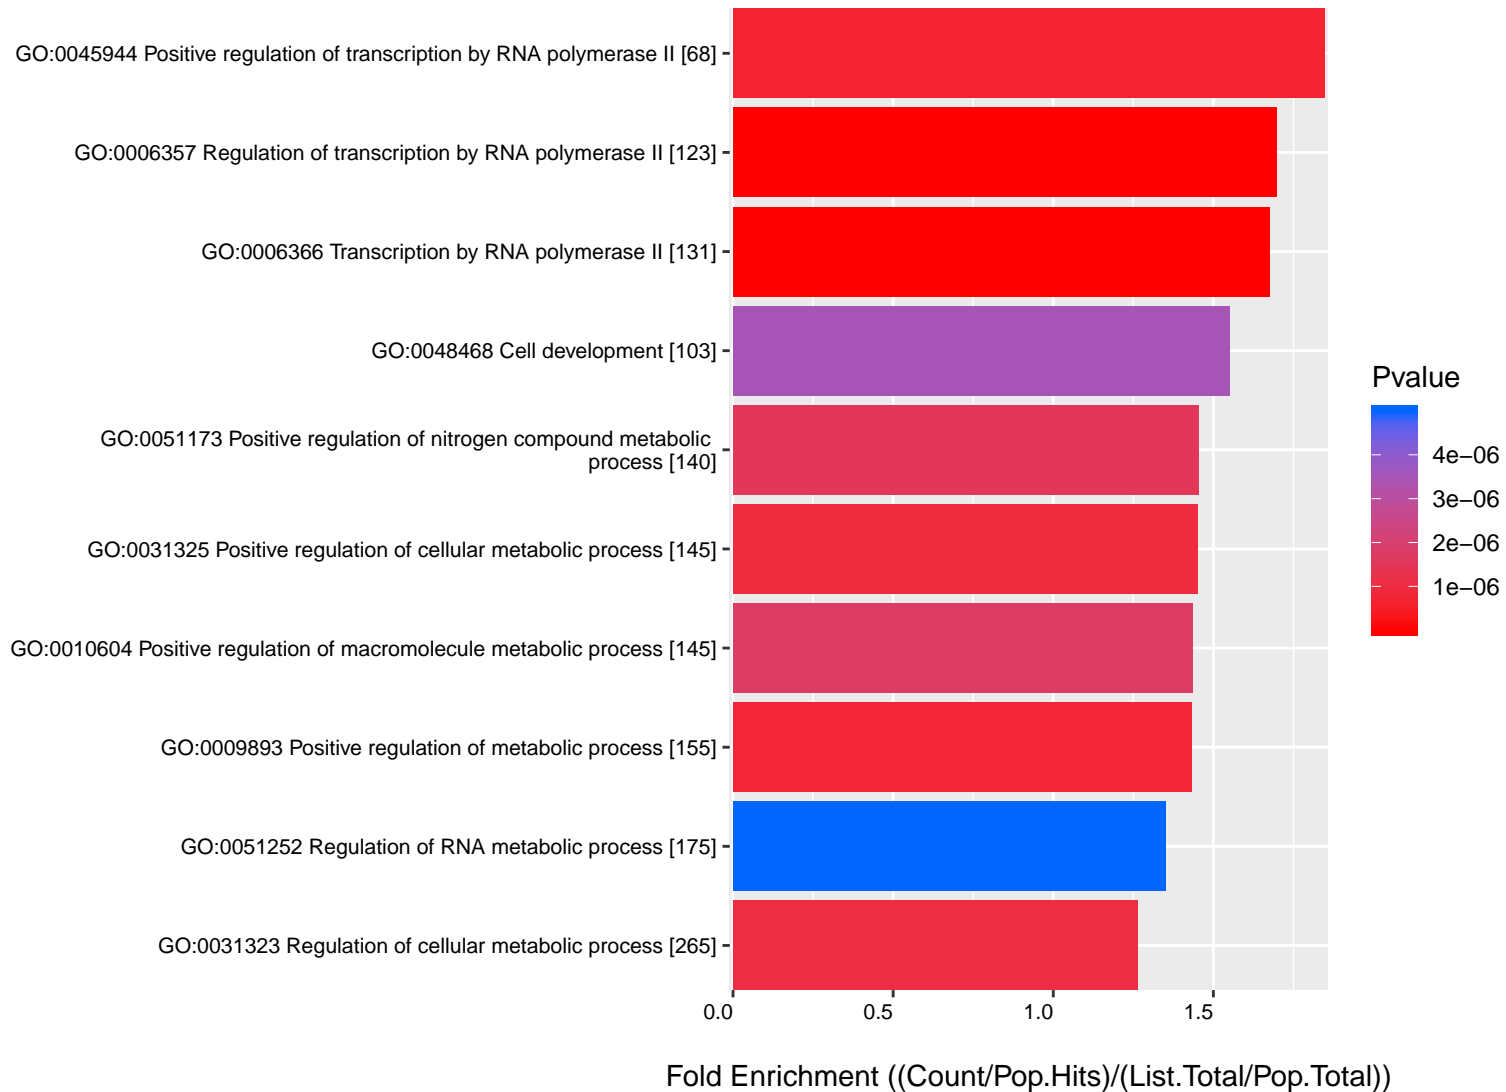

Supplement: s1 [file s1]

## Sig GO terms of DE gene-CC

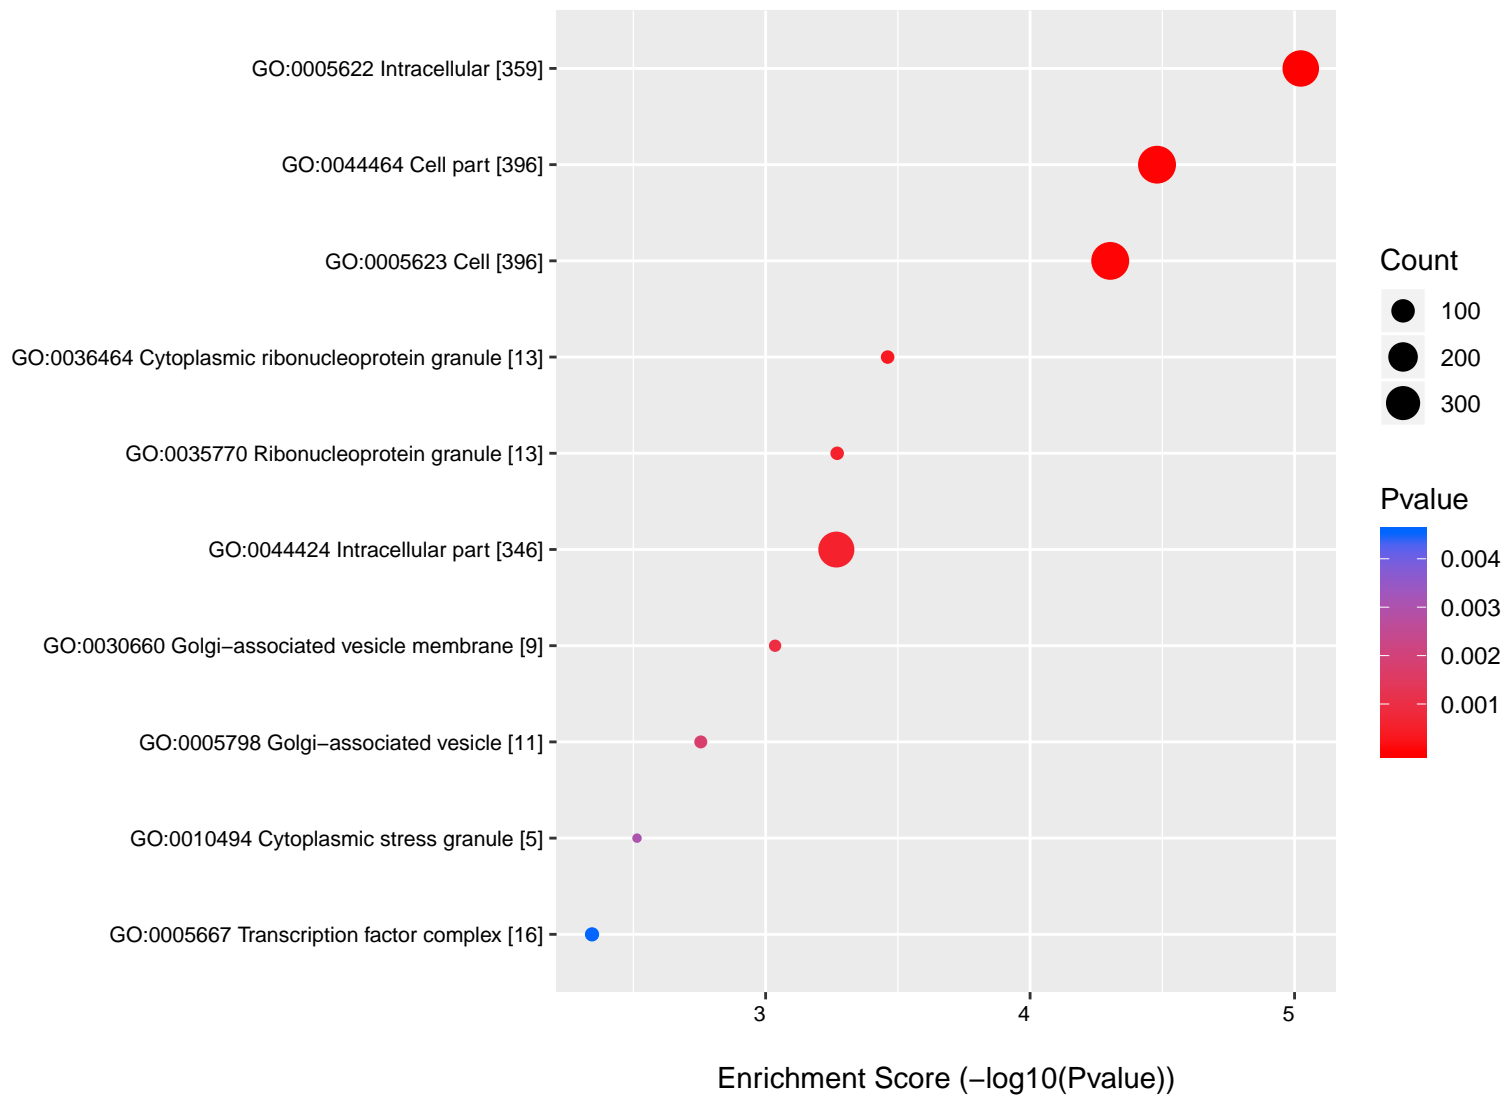

Supplement: s1 [file s1]

## Sig GO terms of DE gene-CC

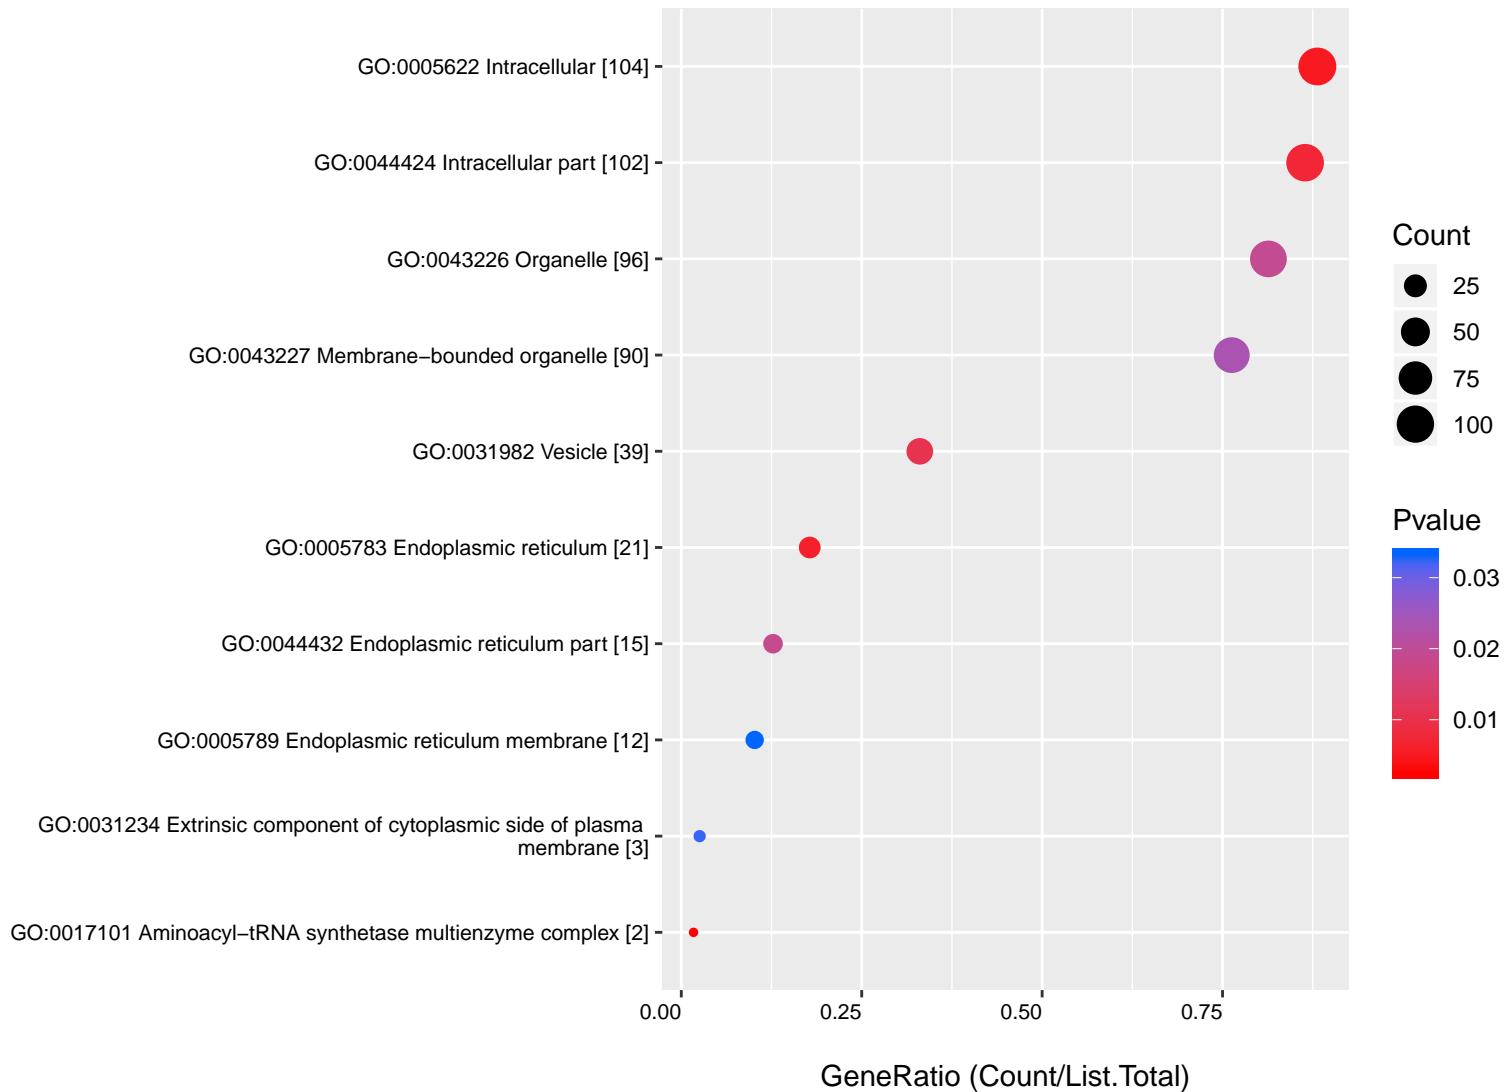

Supplement: s1 [file s1]

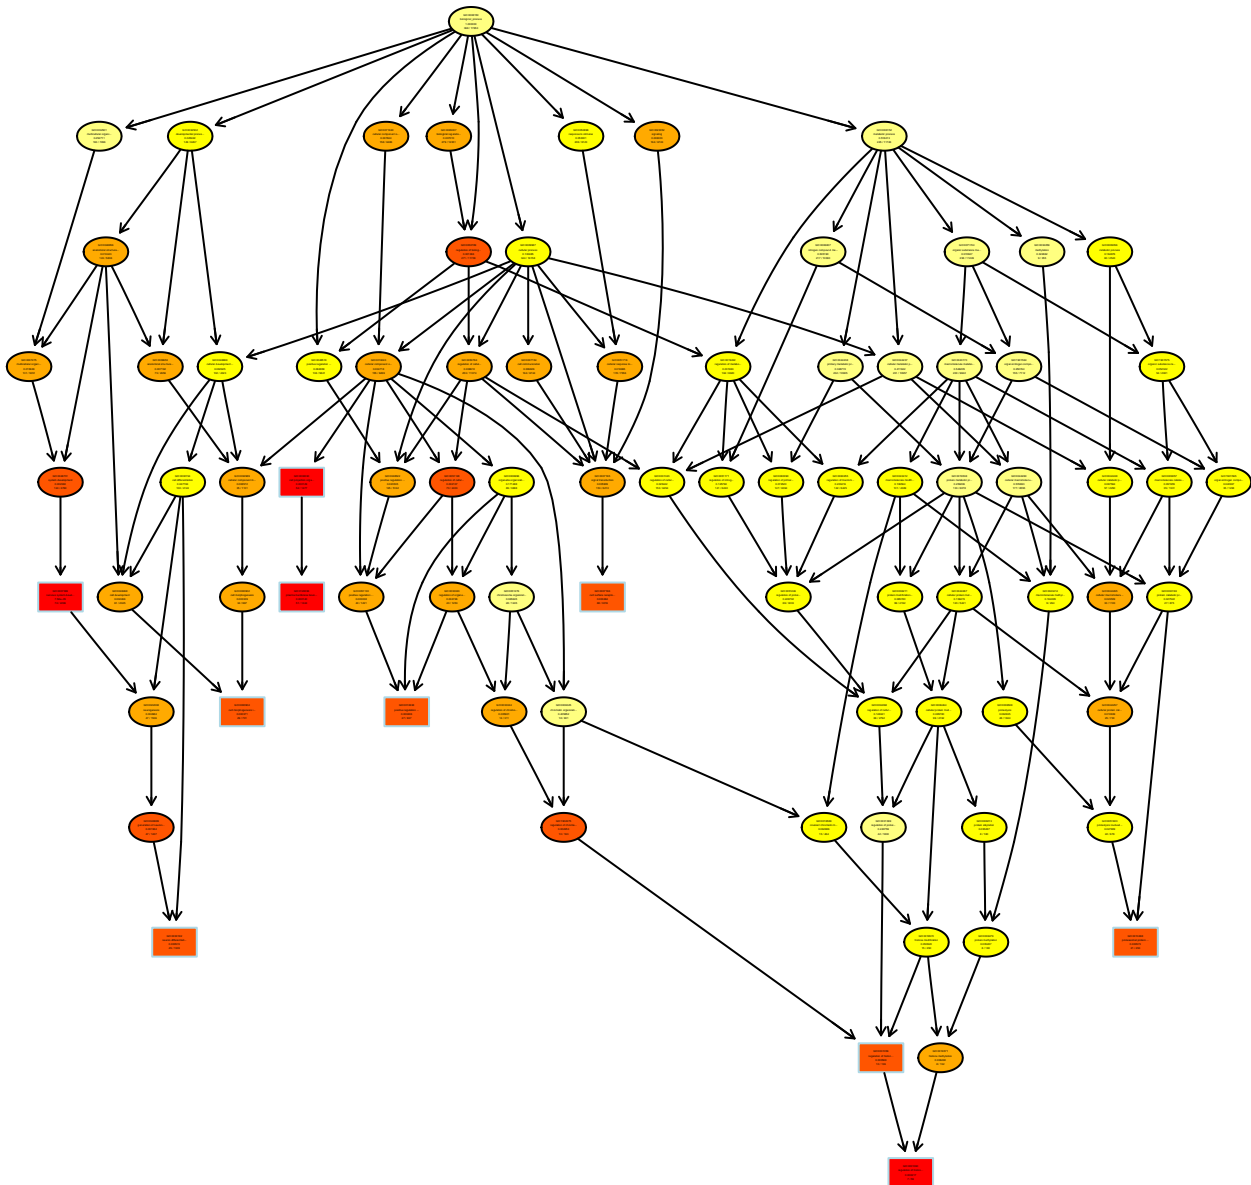

Supplement: s1 [file s1]

# Sig GO terms of DE gene-BP

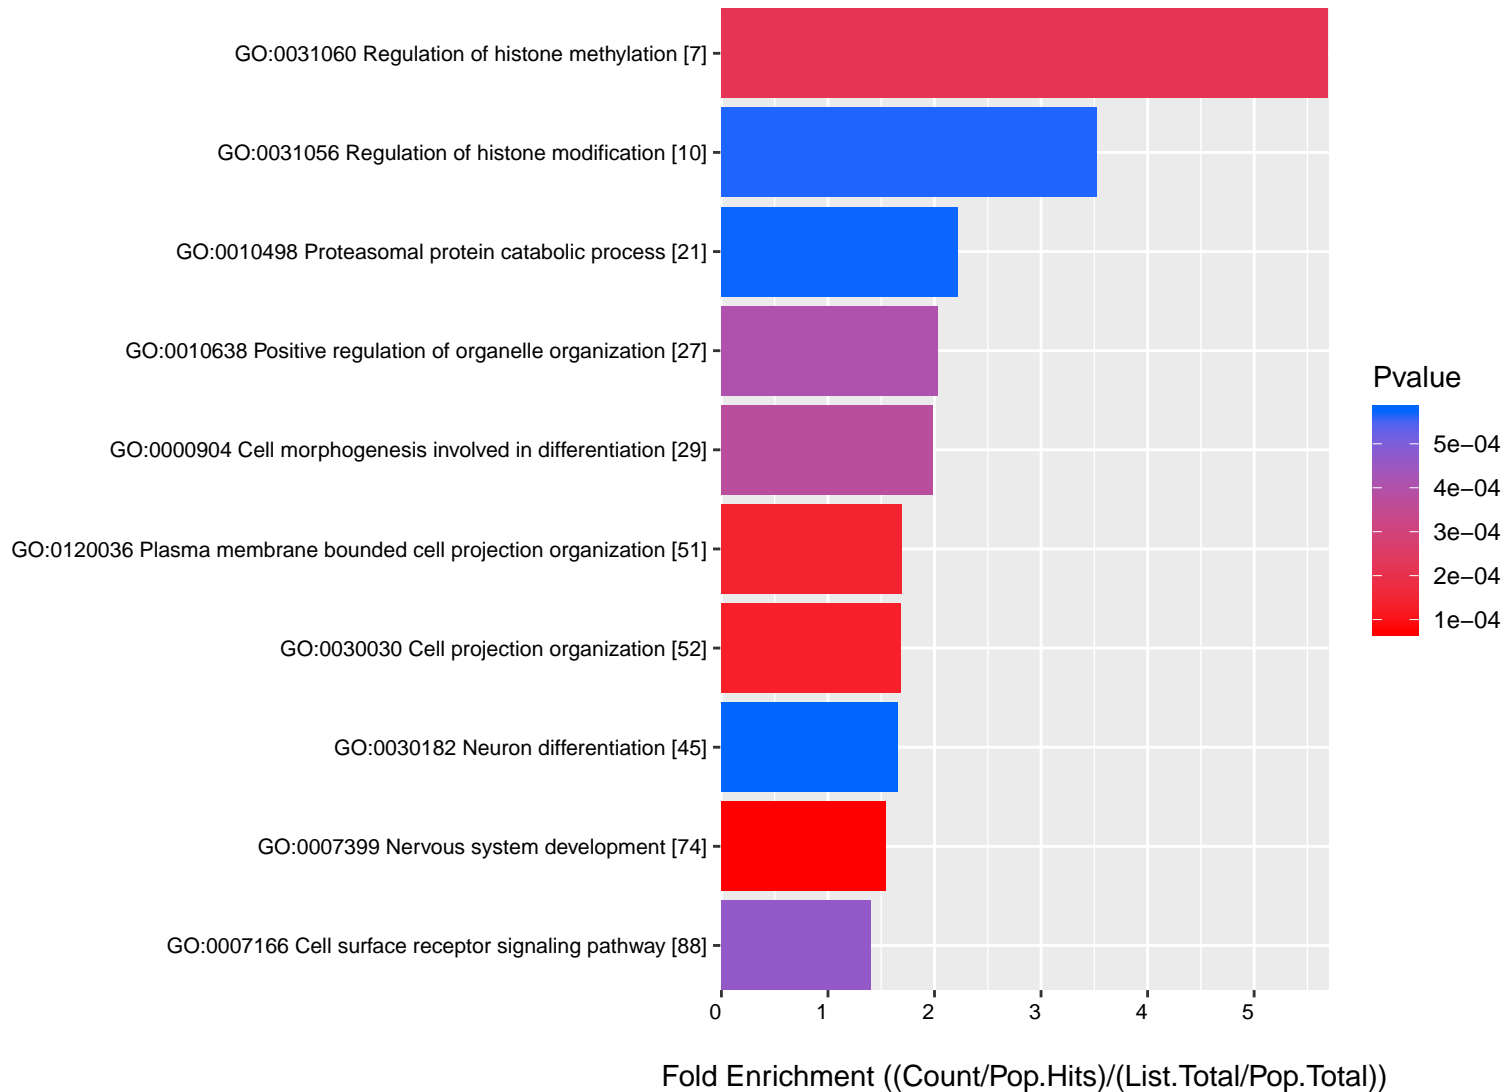

Supplement: s1 [file s1]

# Sig GO terms of DE gene-CC

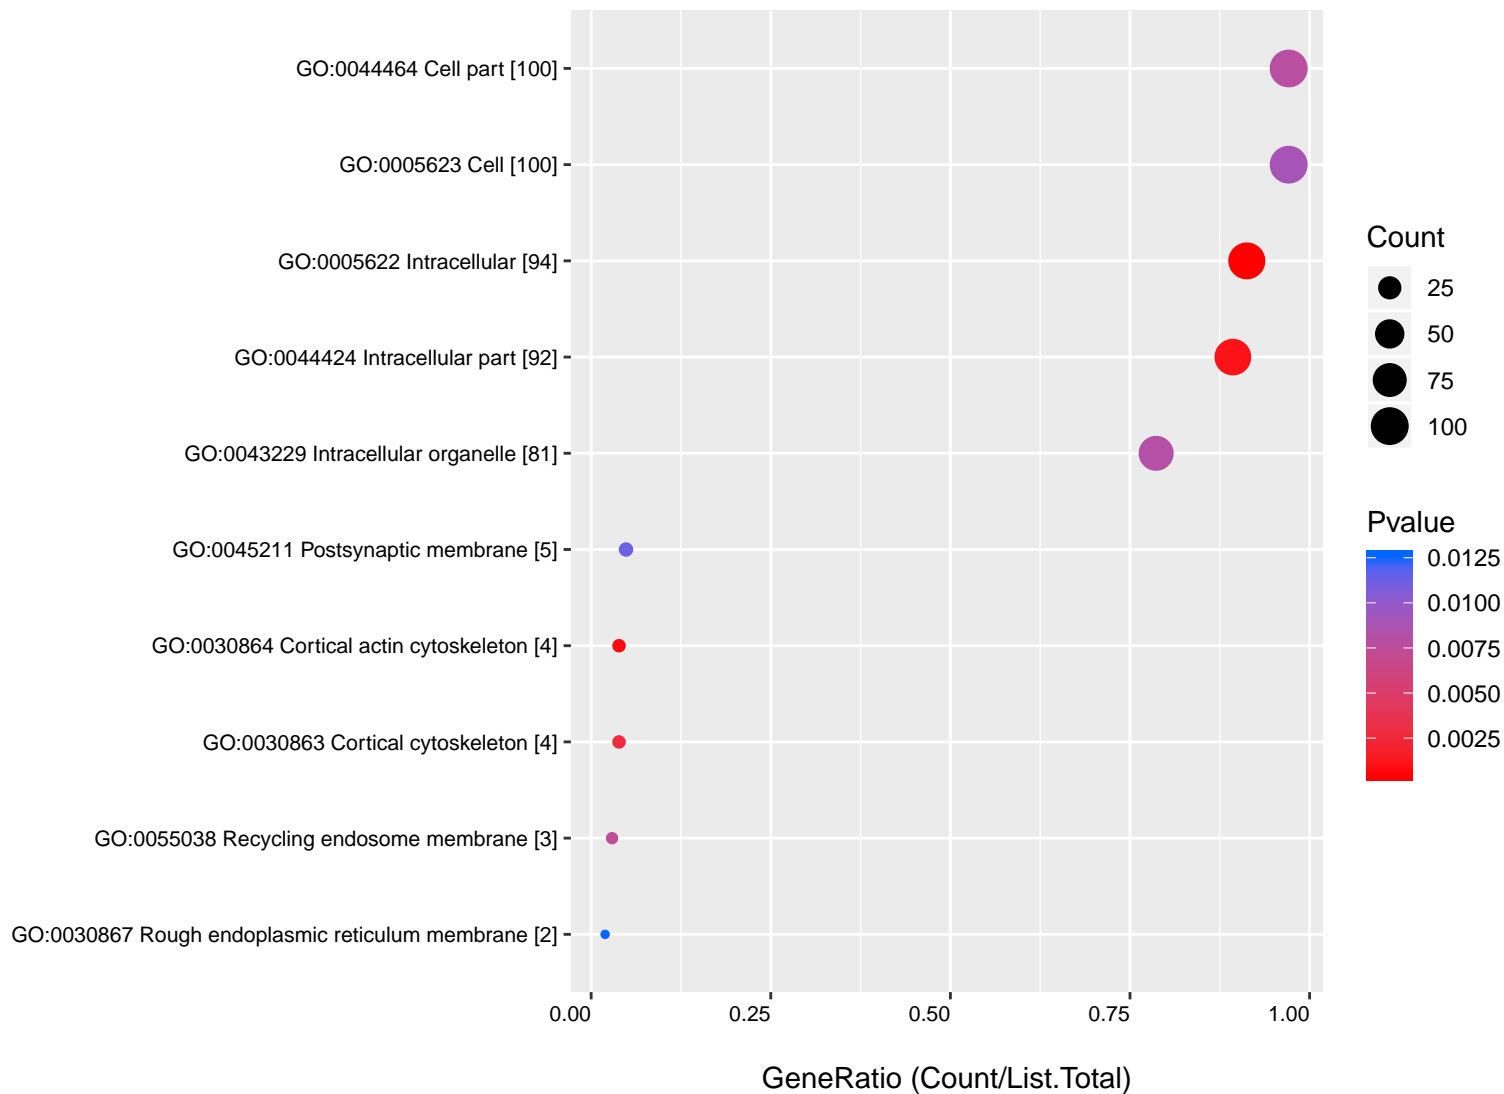

Supplement: s1 [file s1]

# Sig GO terms of DE gene-BP

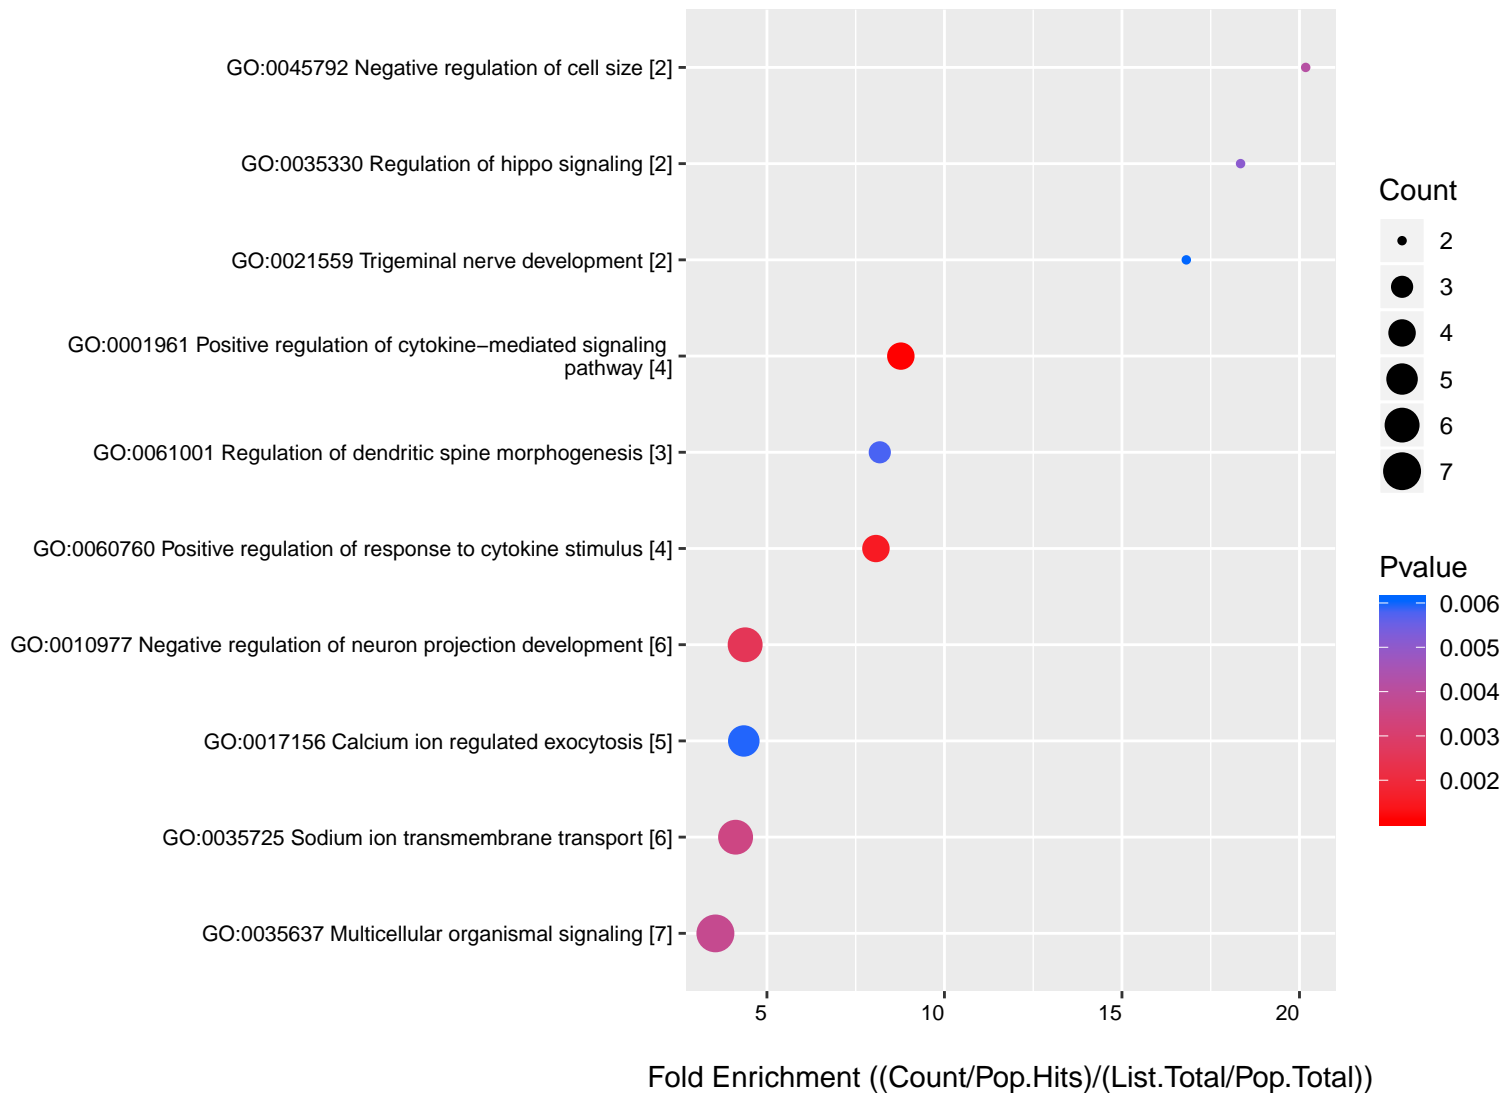

Supplement: s1 [file s1]

## Sig GO terms of DE gene-CC

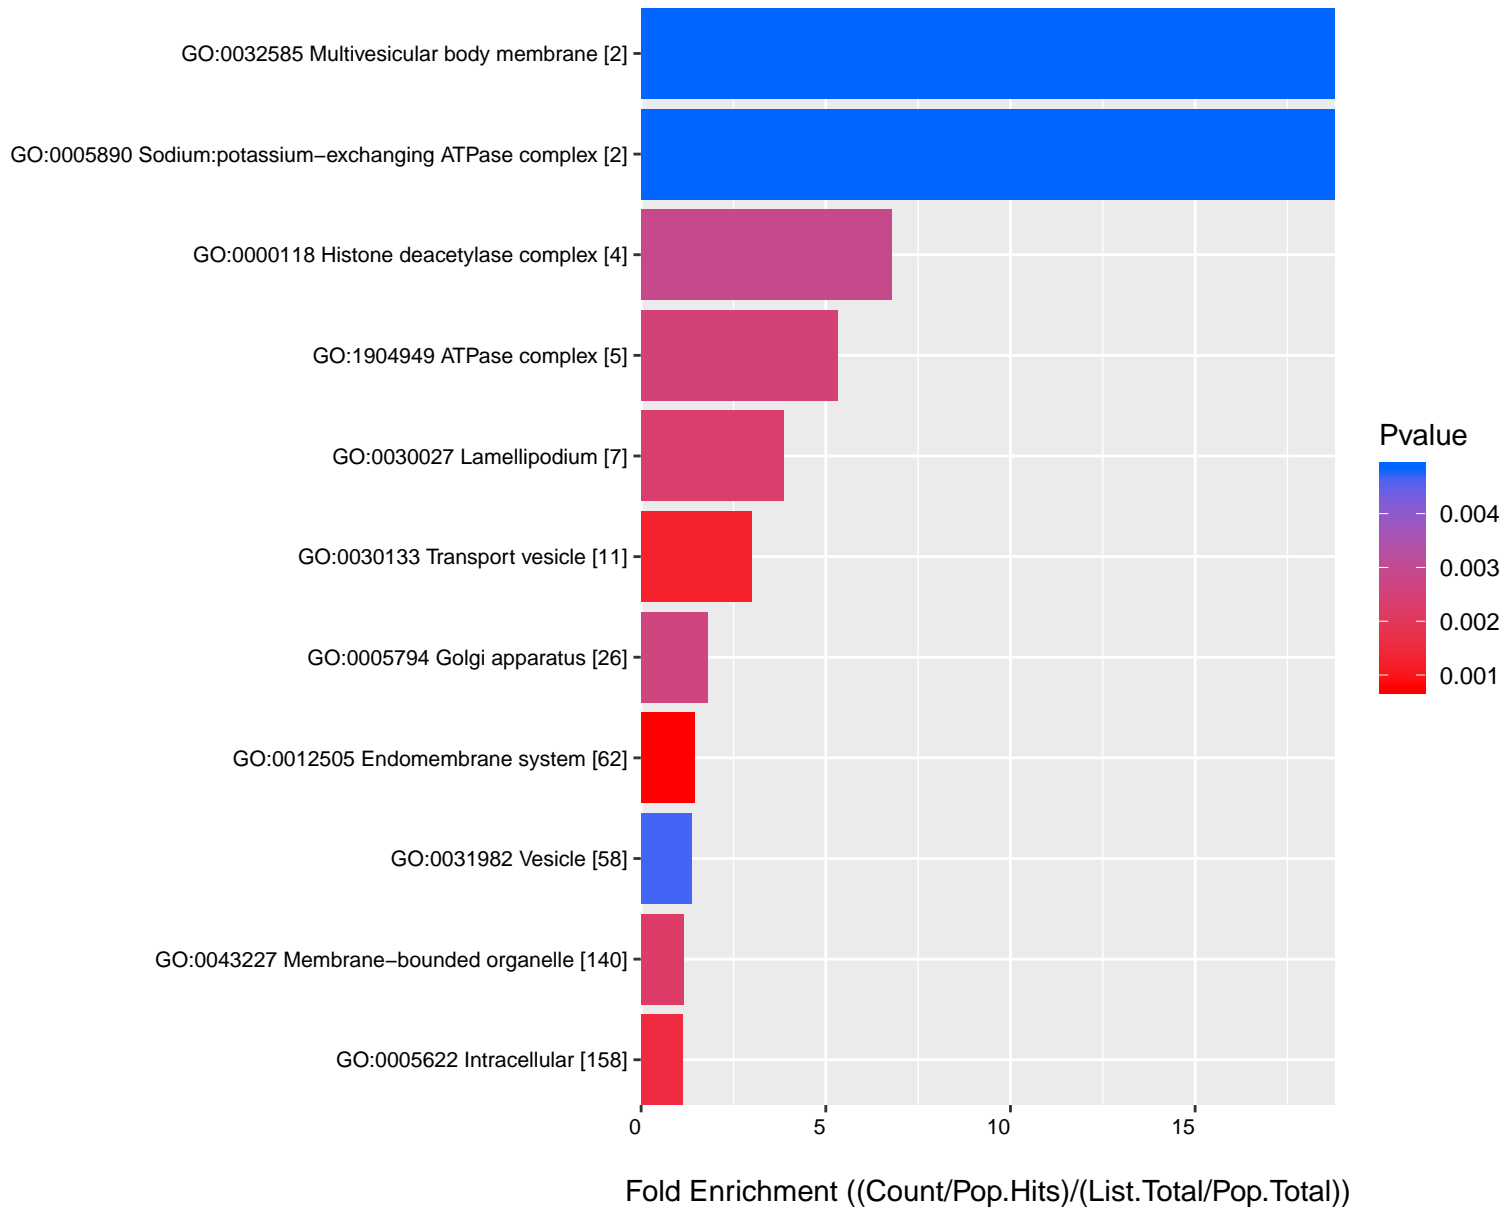

Supplement: s1 [file s1]

# GO Cellular Component Classification

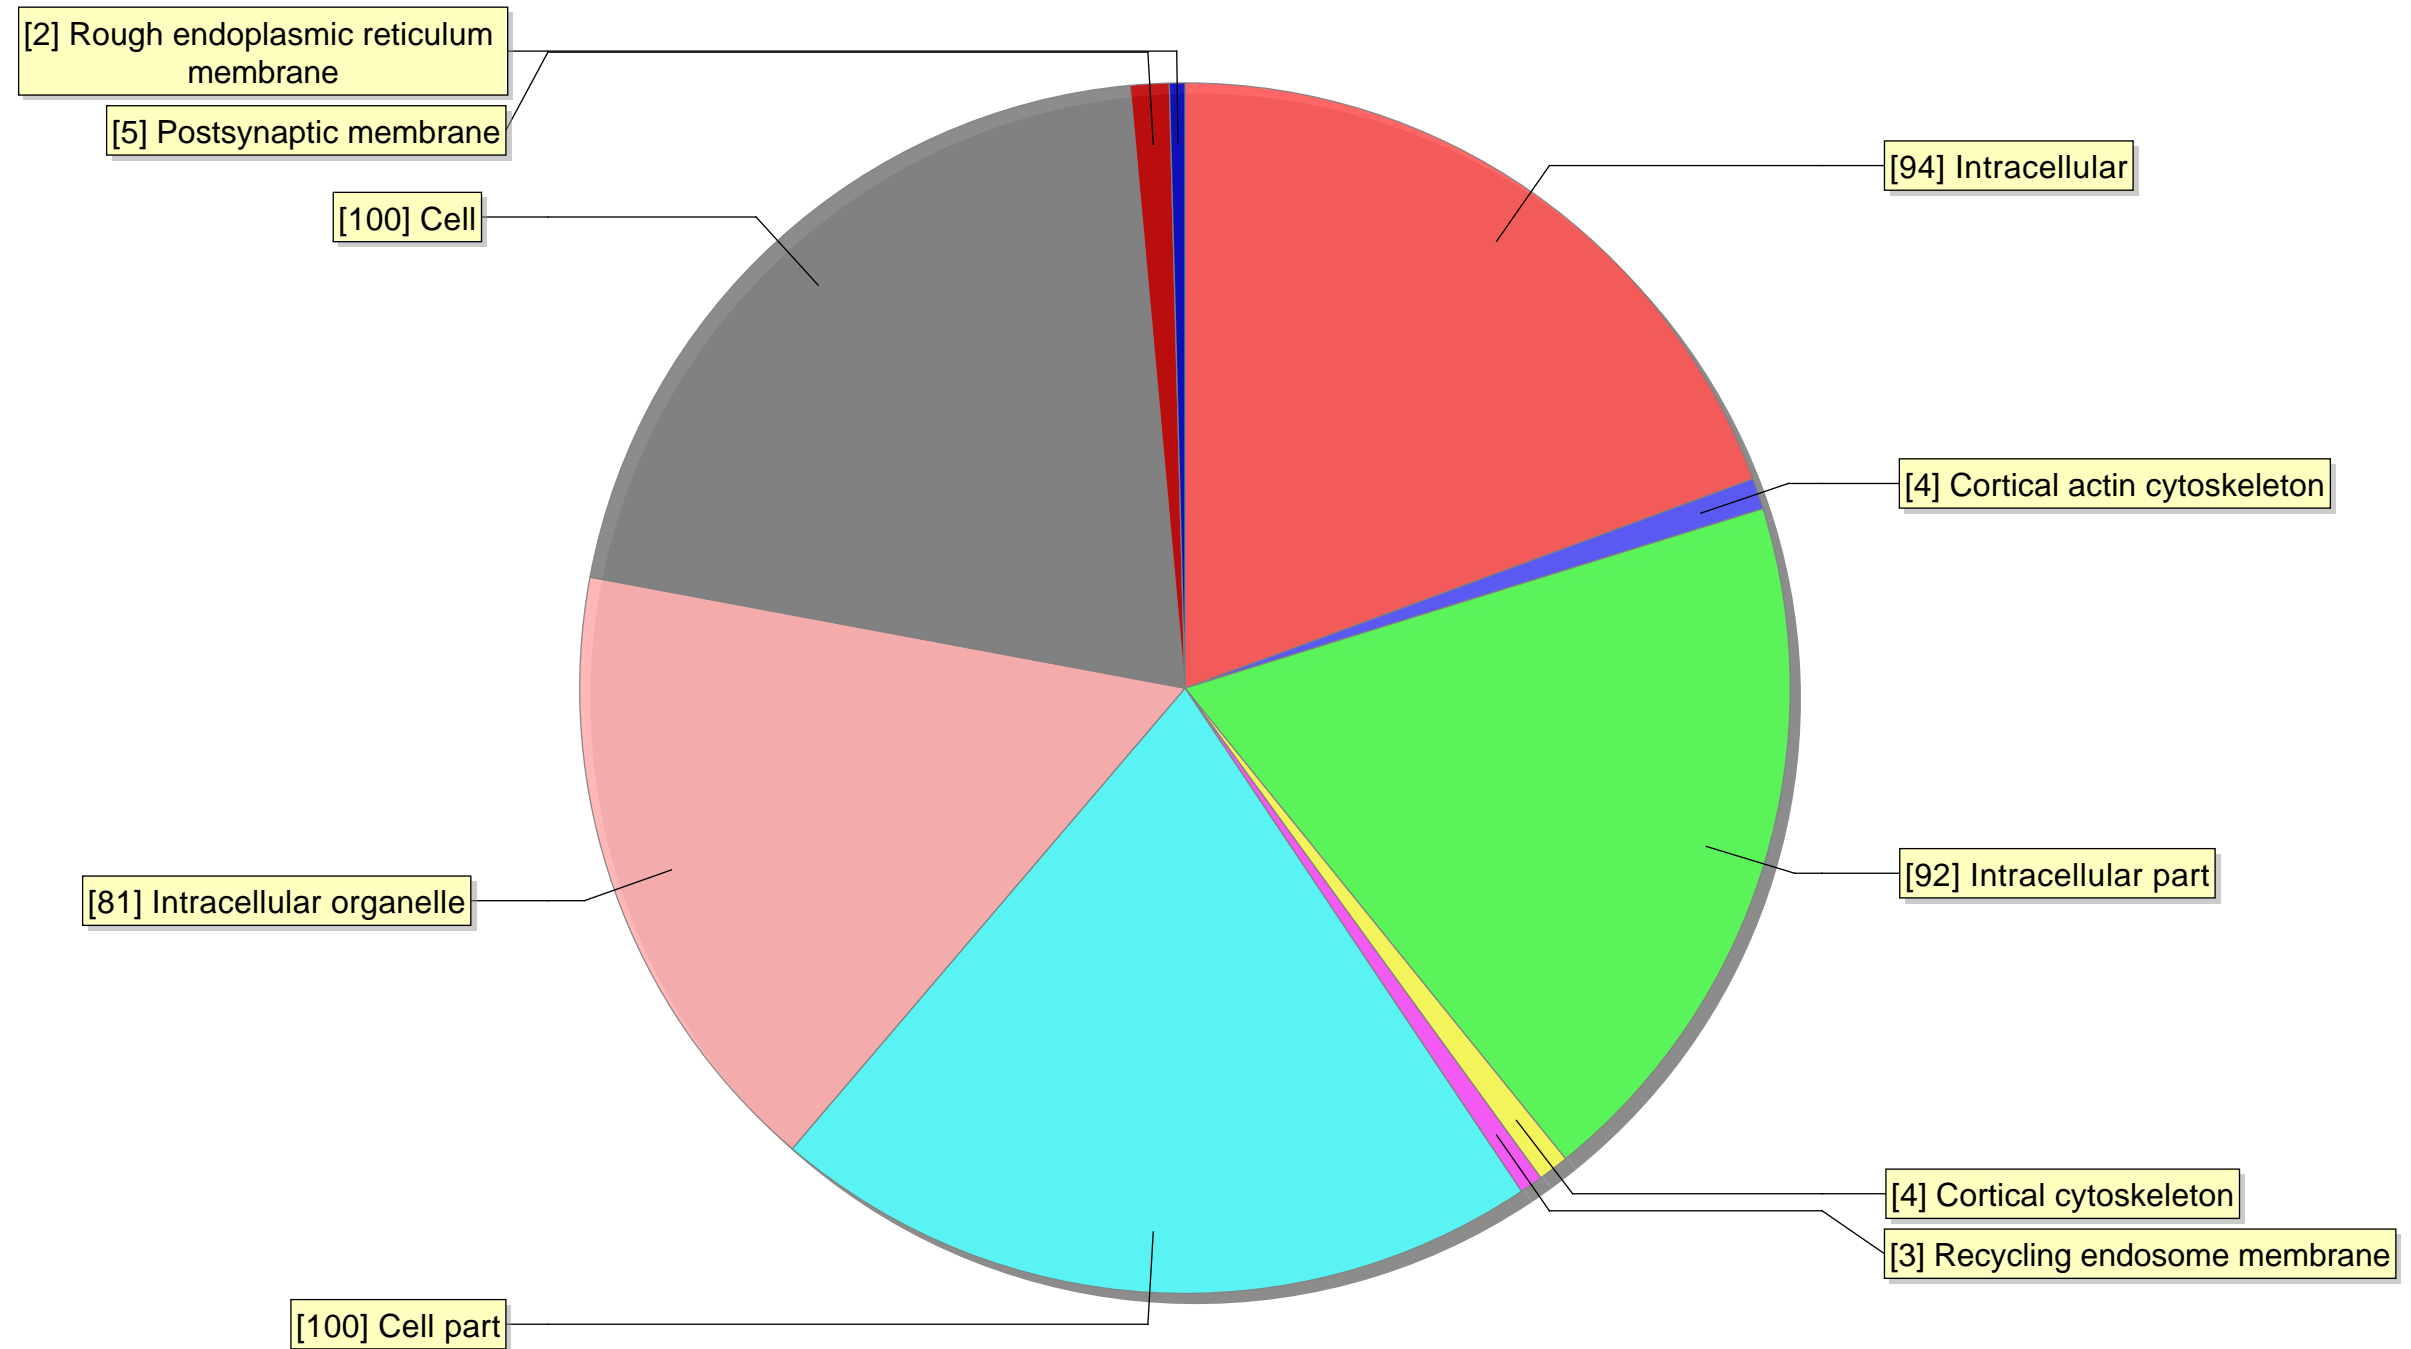

Supplement: s1 [file s1]

## Sig GO terms of DE gene-CC

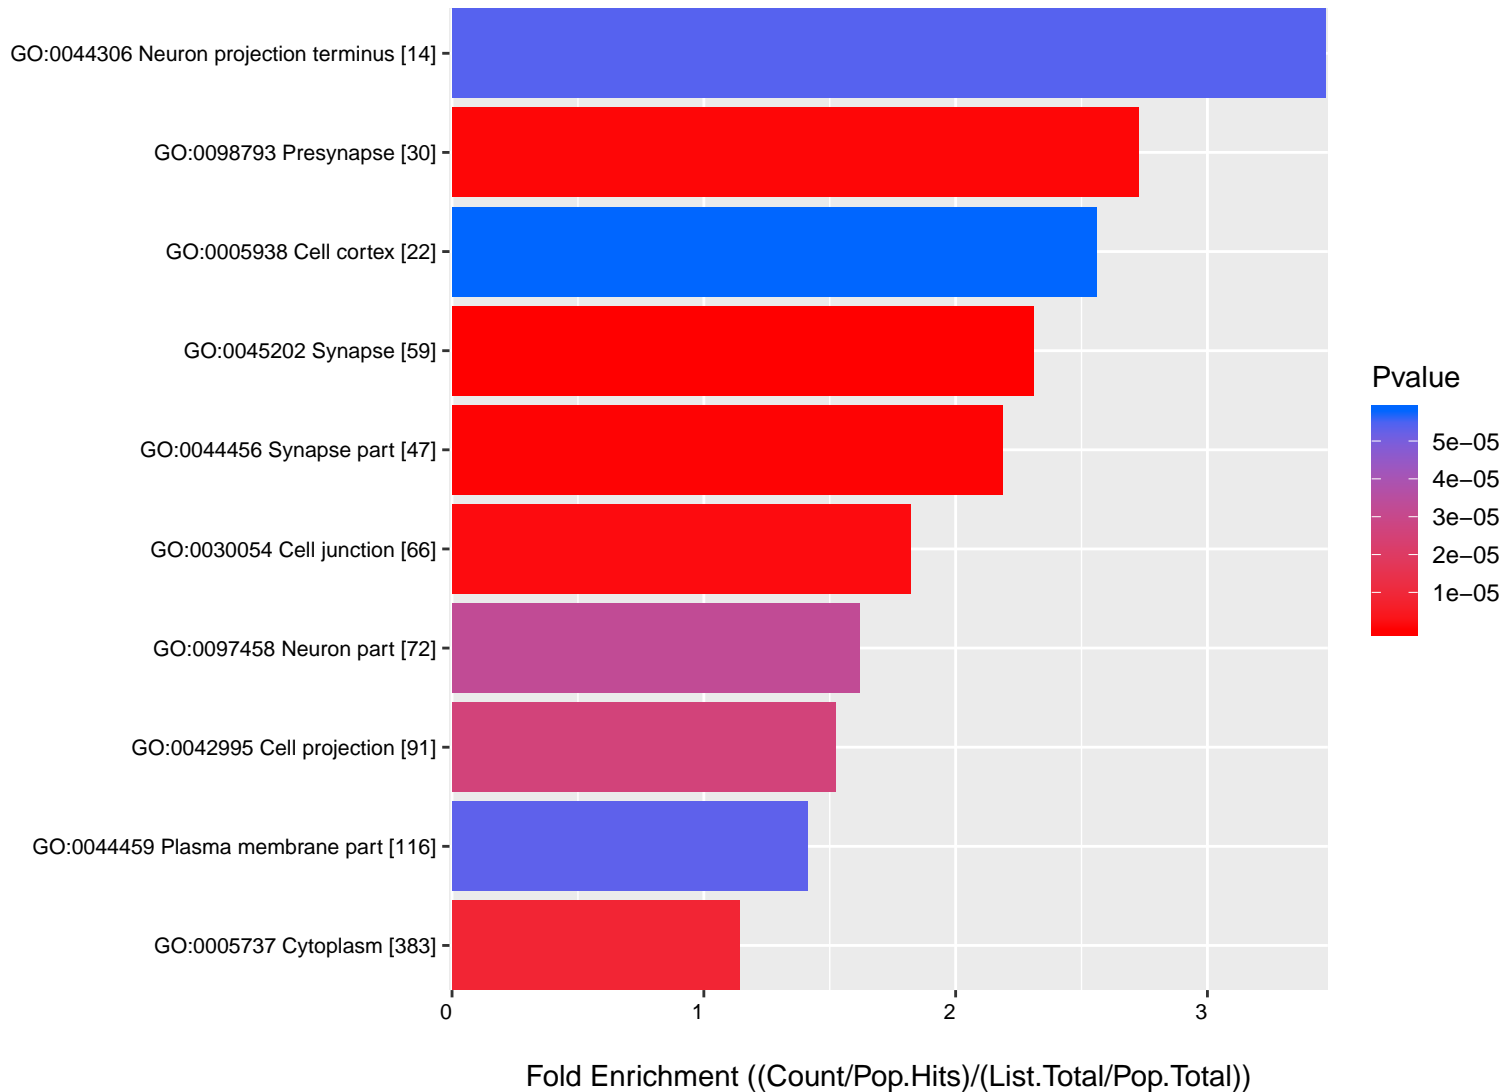

Supplement: s1 [file s1]

# Sig GO terms of DE gene-MF

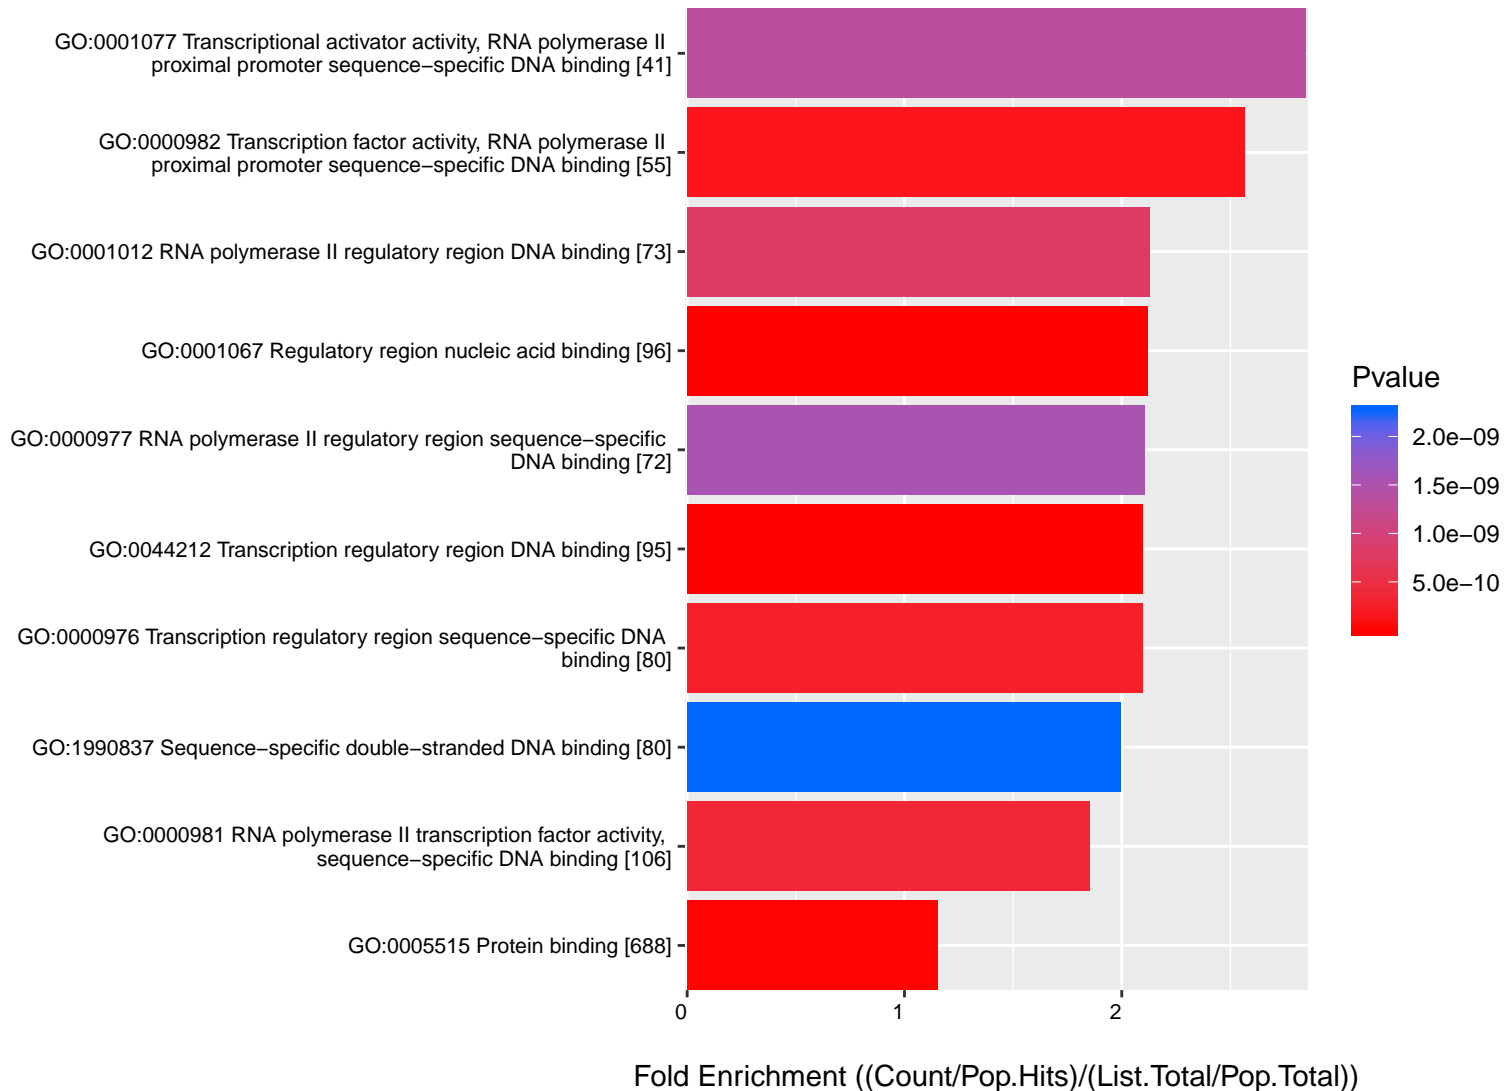

Supplement: s1 [file s1]

# Sig GO terms of DE gene-BP

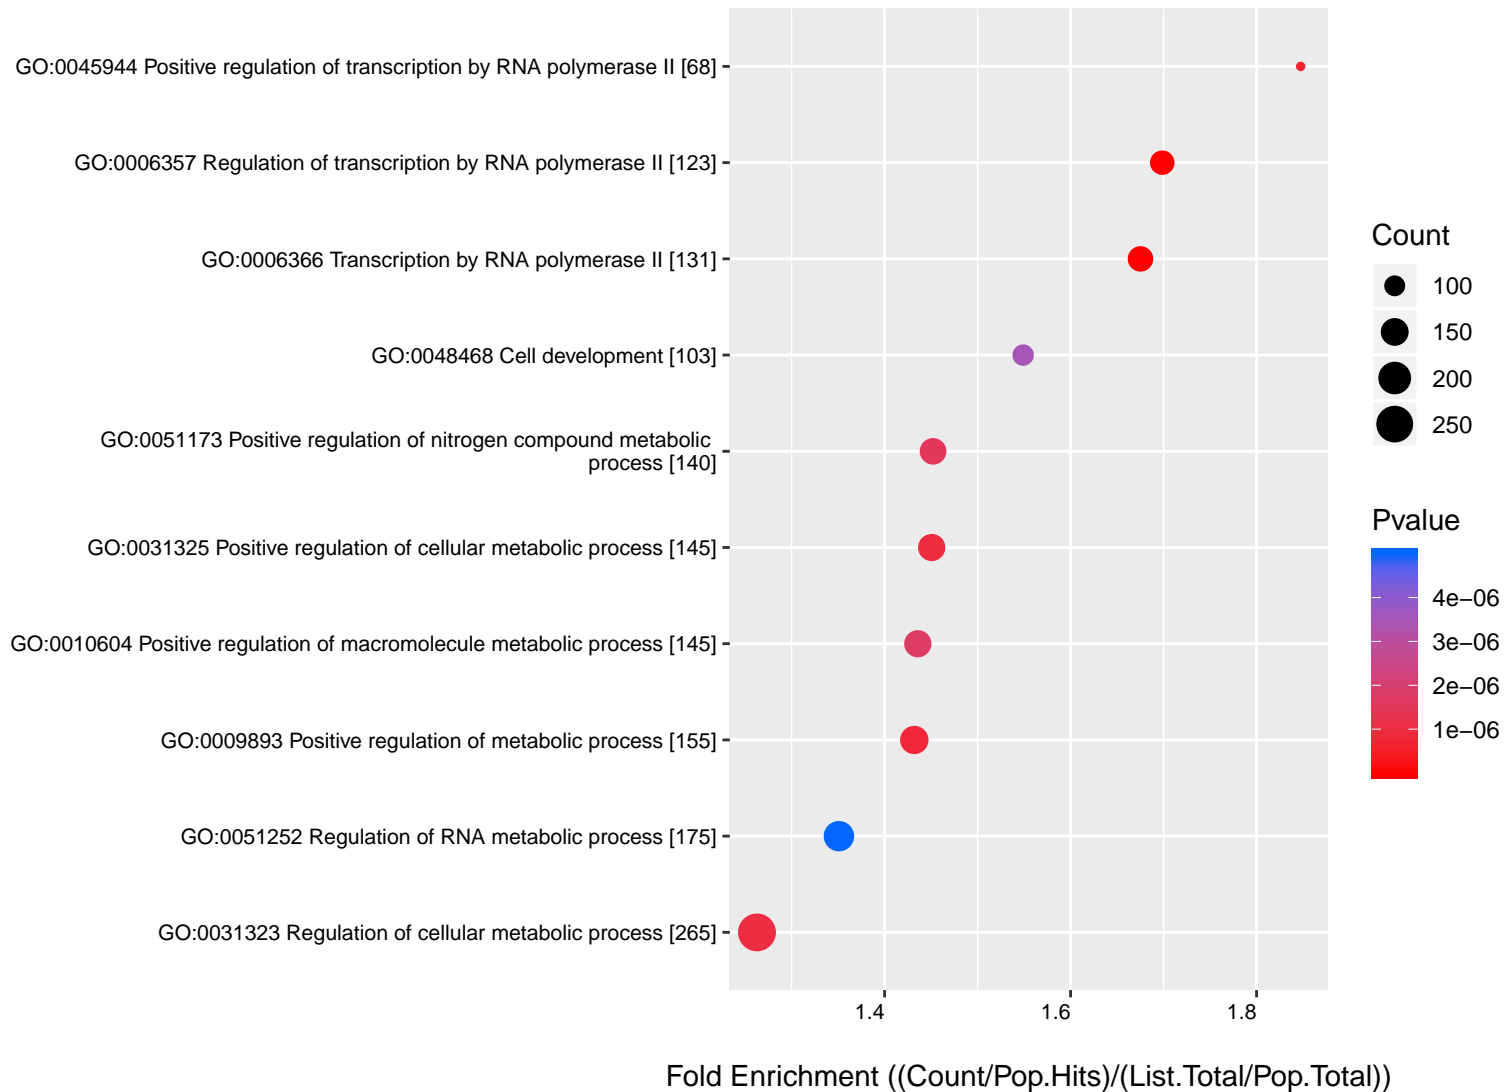

Supplement: s1 [file s1]

# Sig GO terms of DE gene-BP

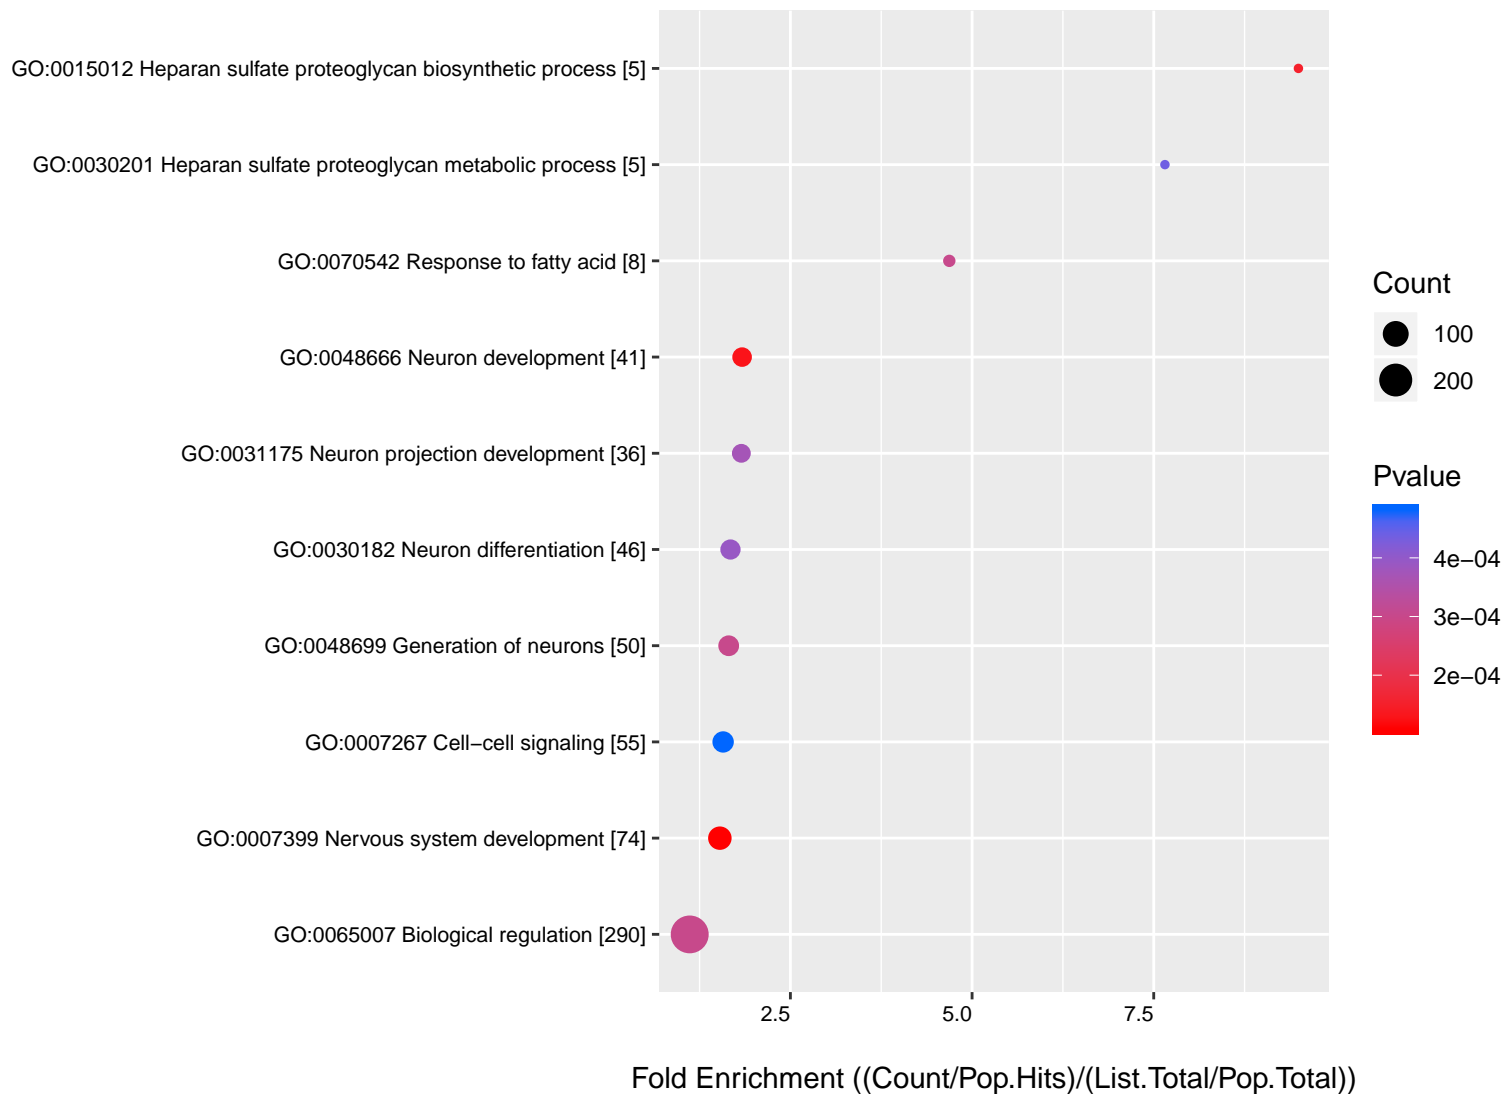

Supplement: s1 [file s1]

# Sig GO terms of DE gene-BP

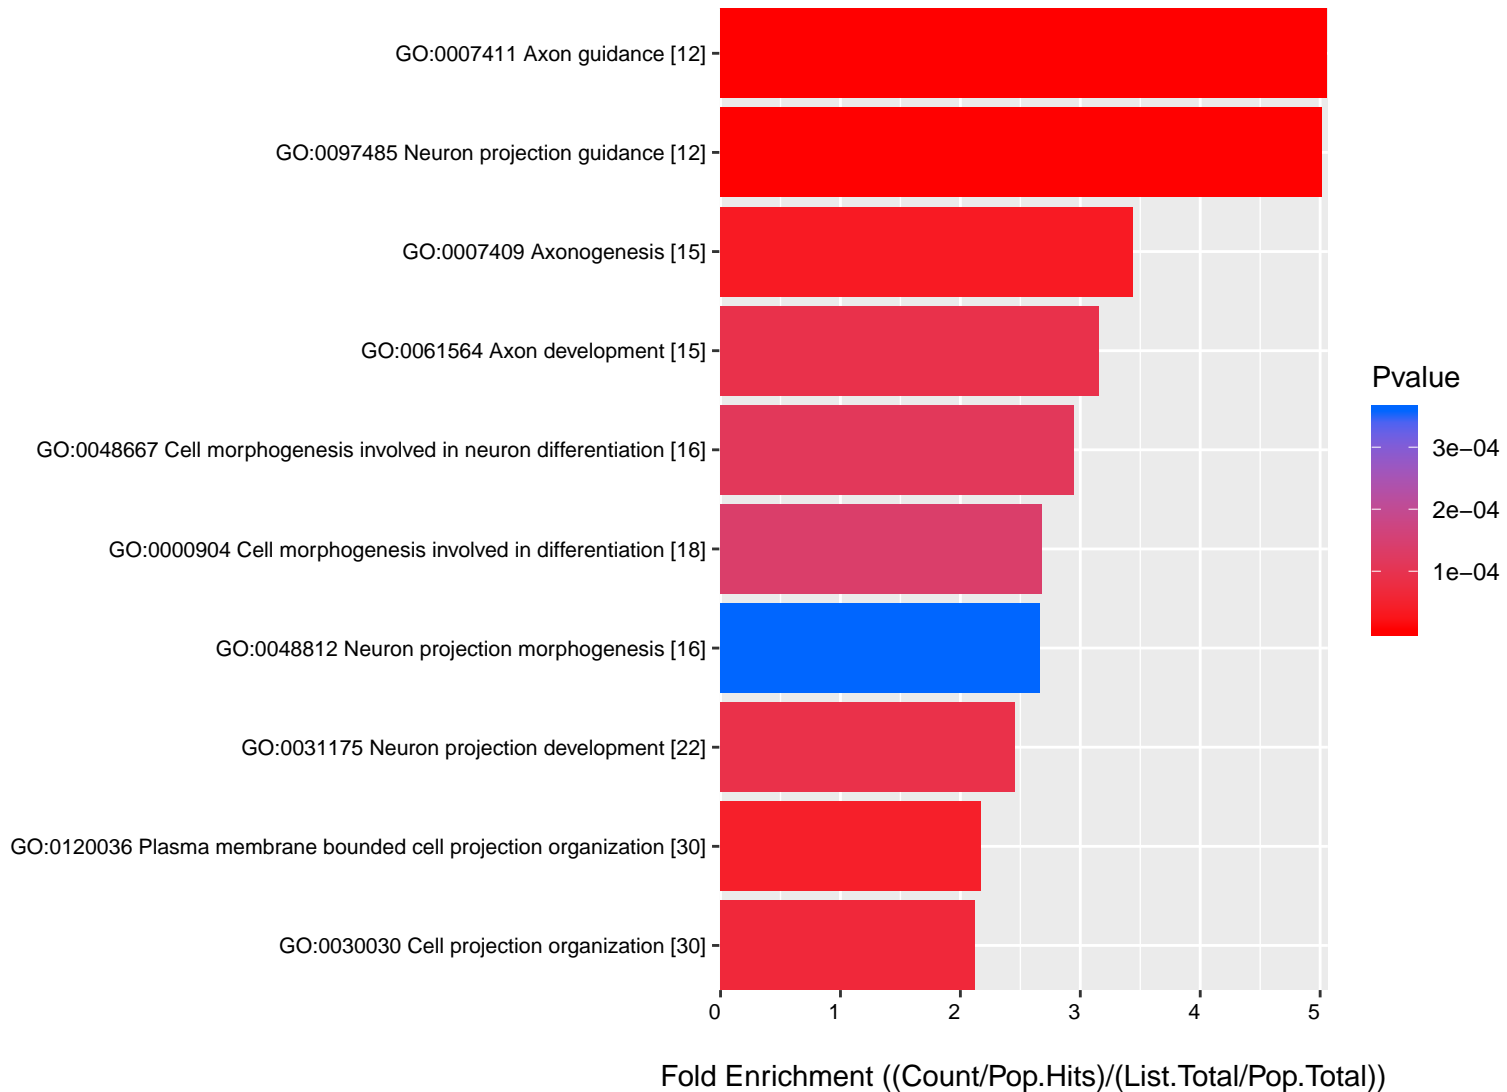

Supplement: s1 [file s1]

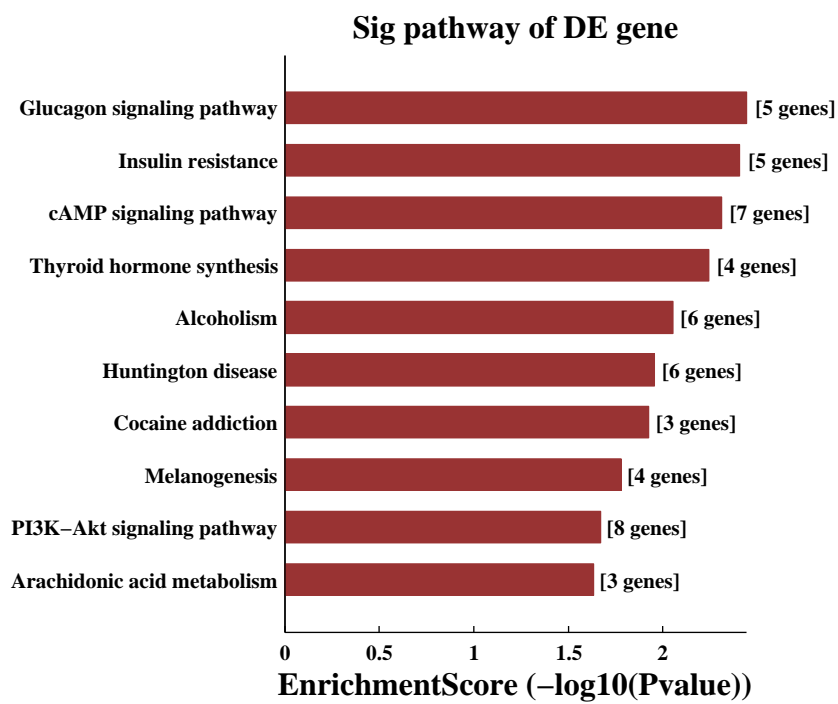

Supplement: s1 [file s1]

# Sig GO terms of DE gene–MF

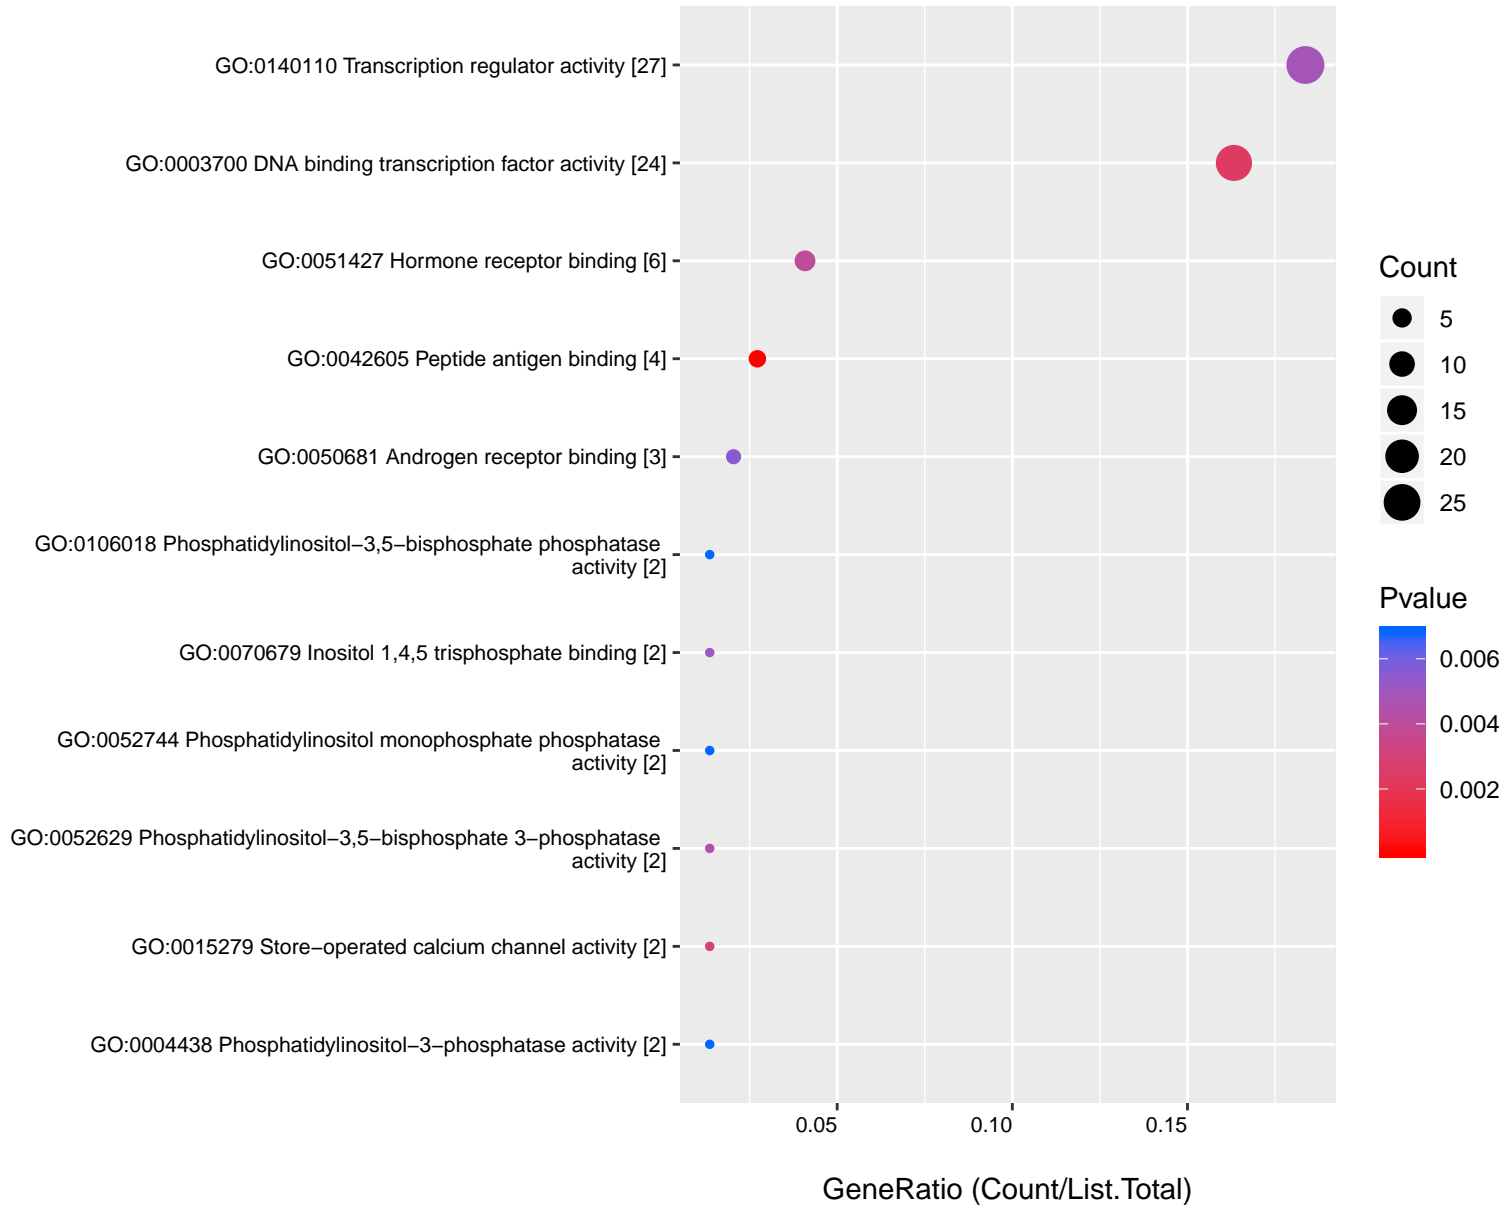

Supplement: s1 [file s1]

## Sig GO terms of DE gene–MF

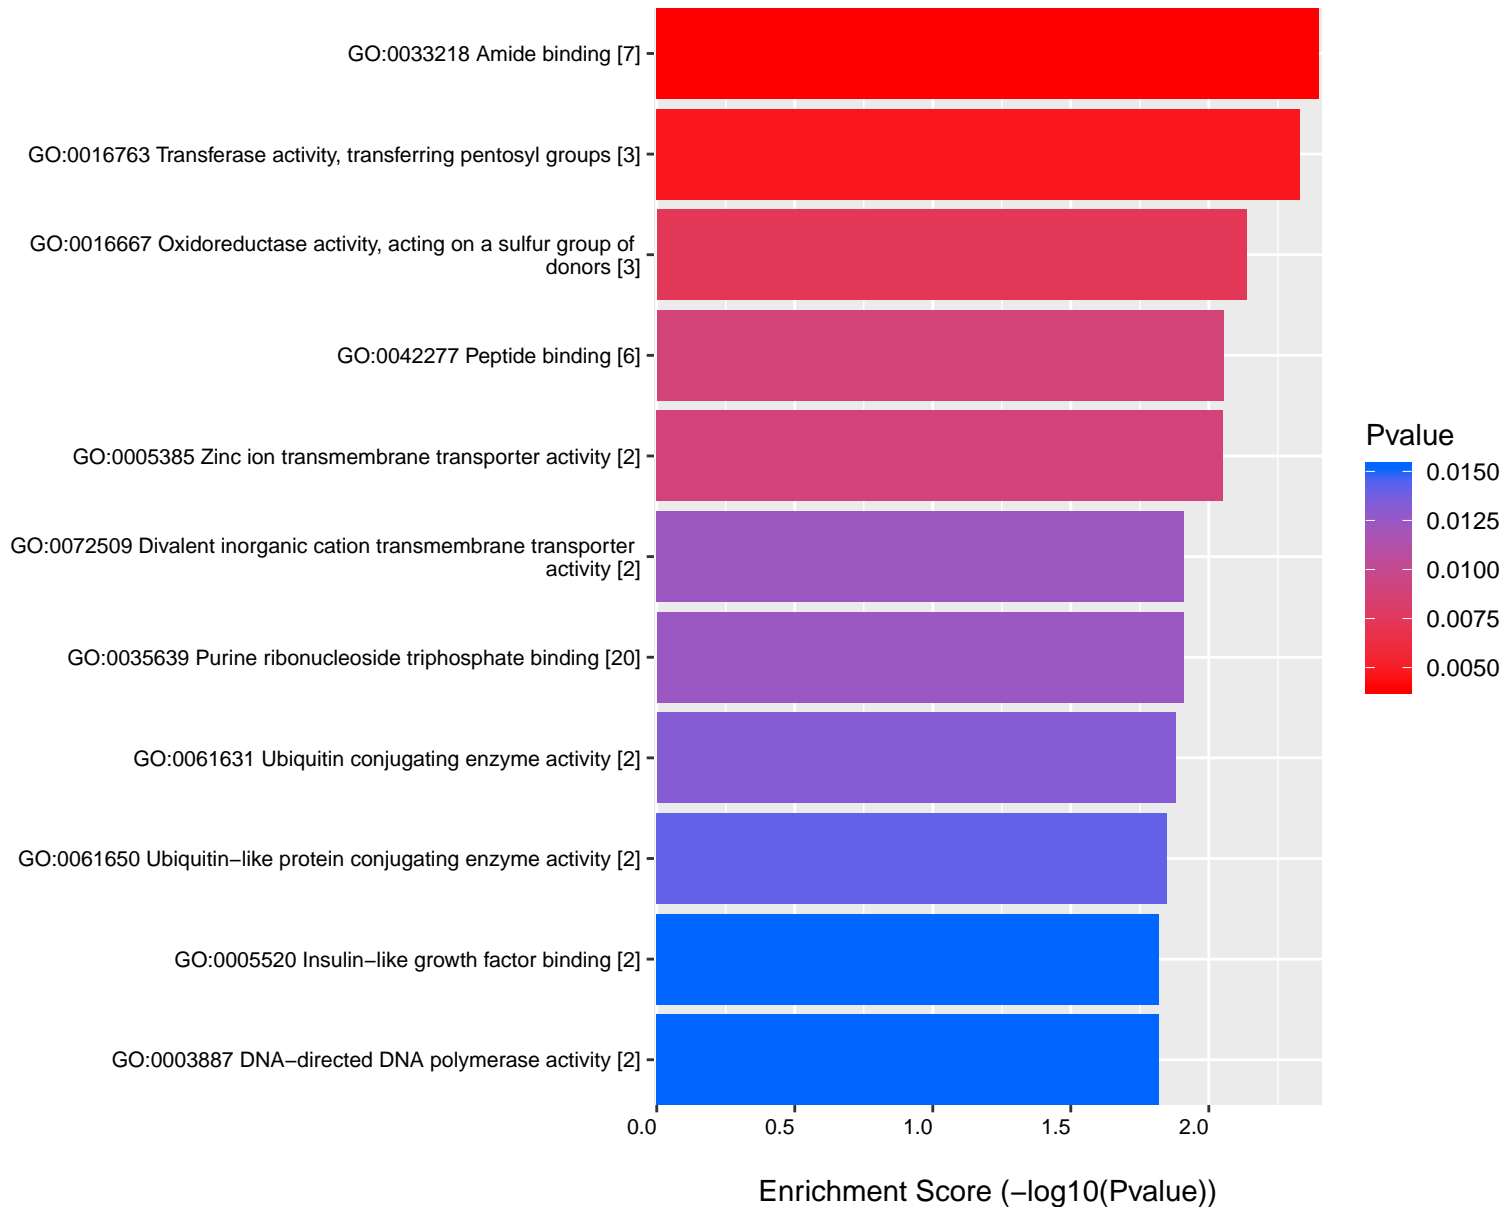

Supplement: s1 [file s1]

# Sig GO terms of DE gene-BP

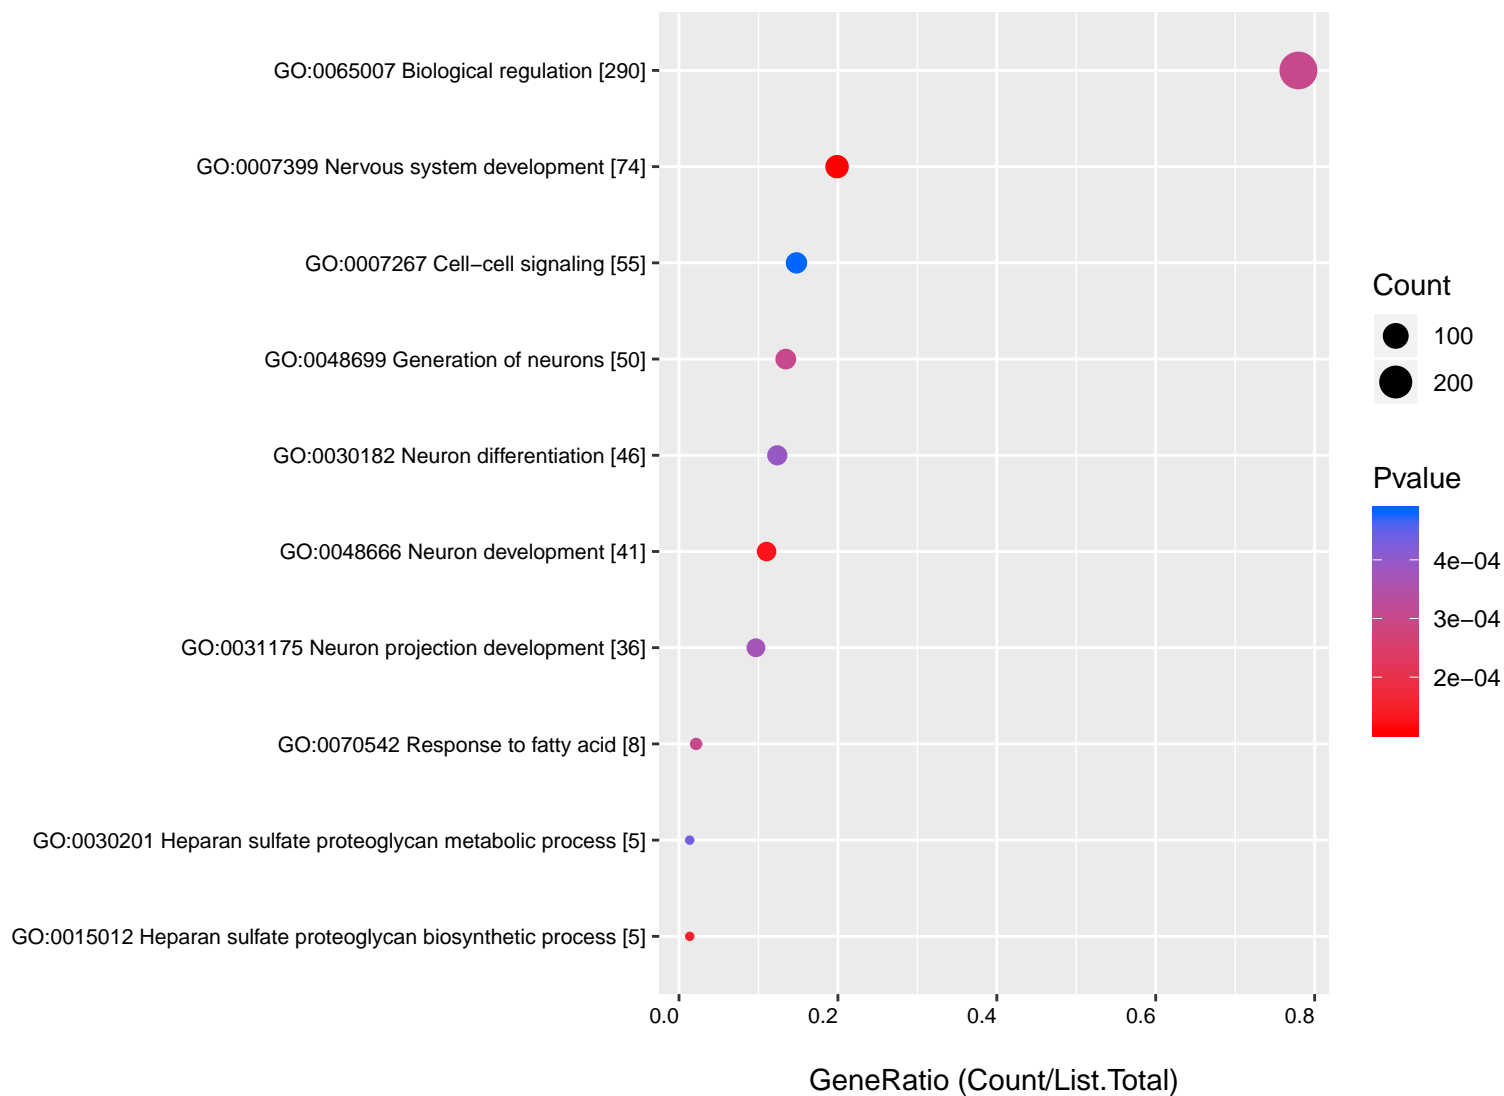

Supplement: s1 [file s1]

# Sig GO terms of DE gene-MF

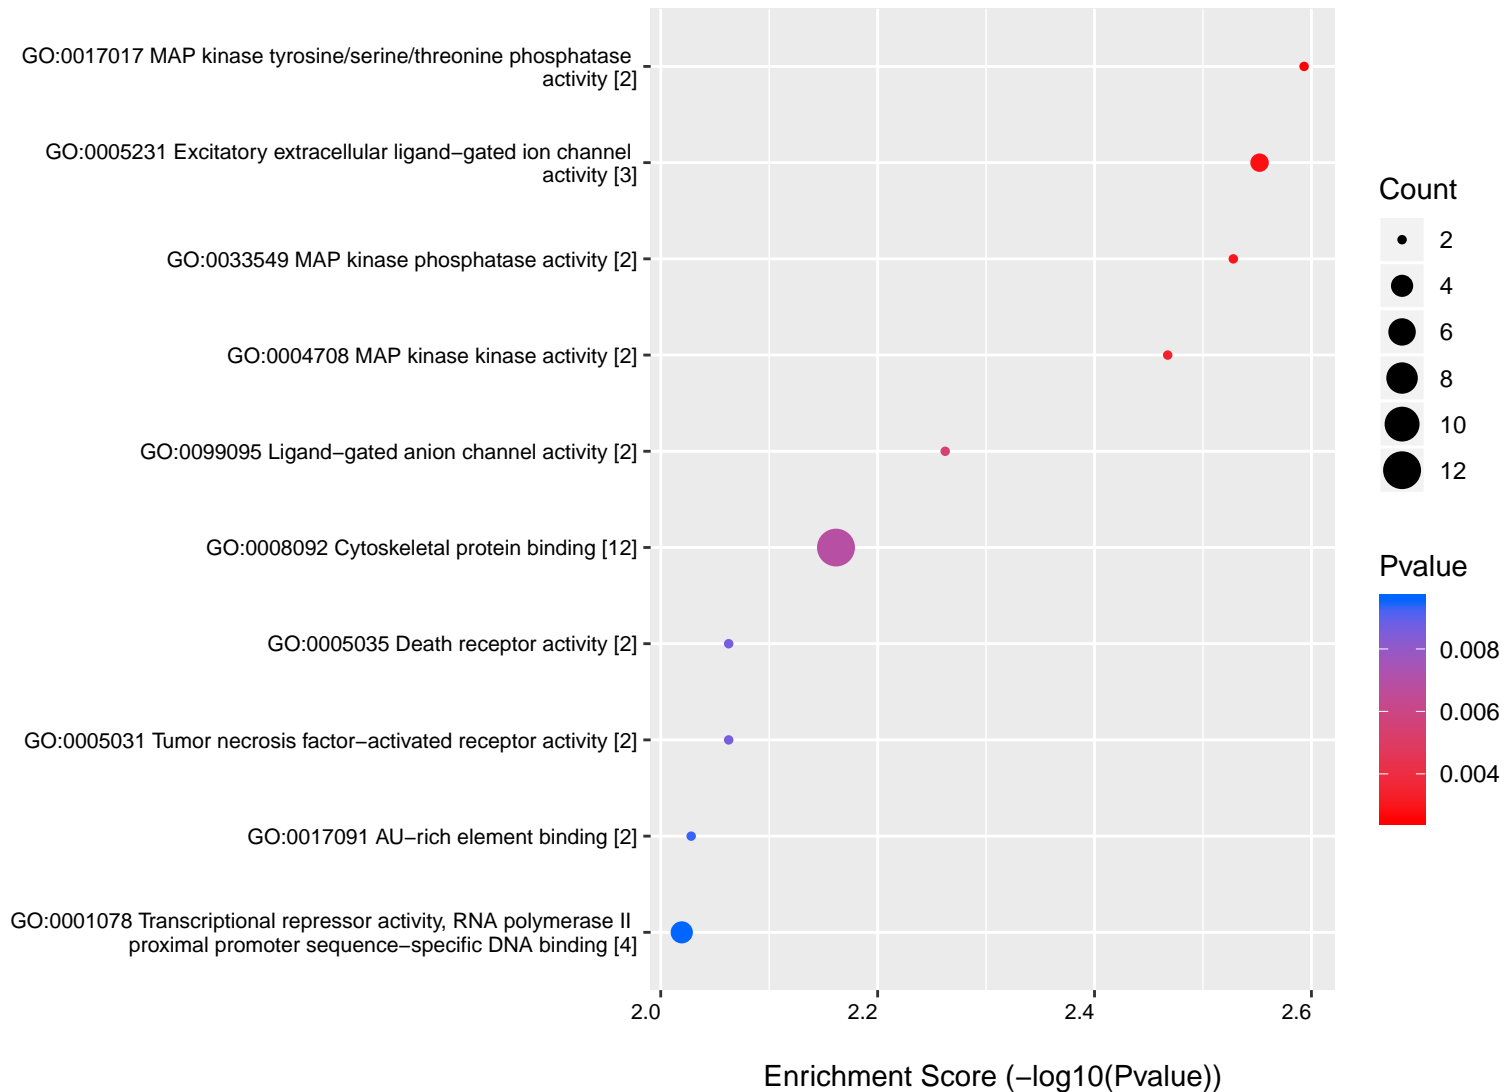

Supplement: s1 [file s1]

## Sig GO terms of DE gene-BP

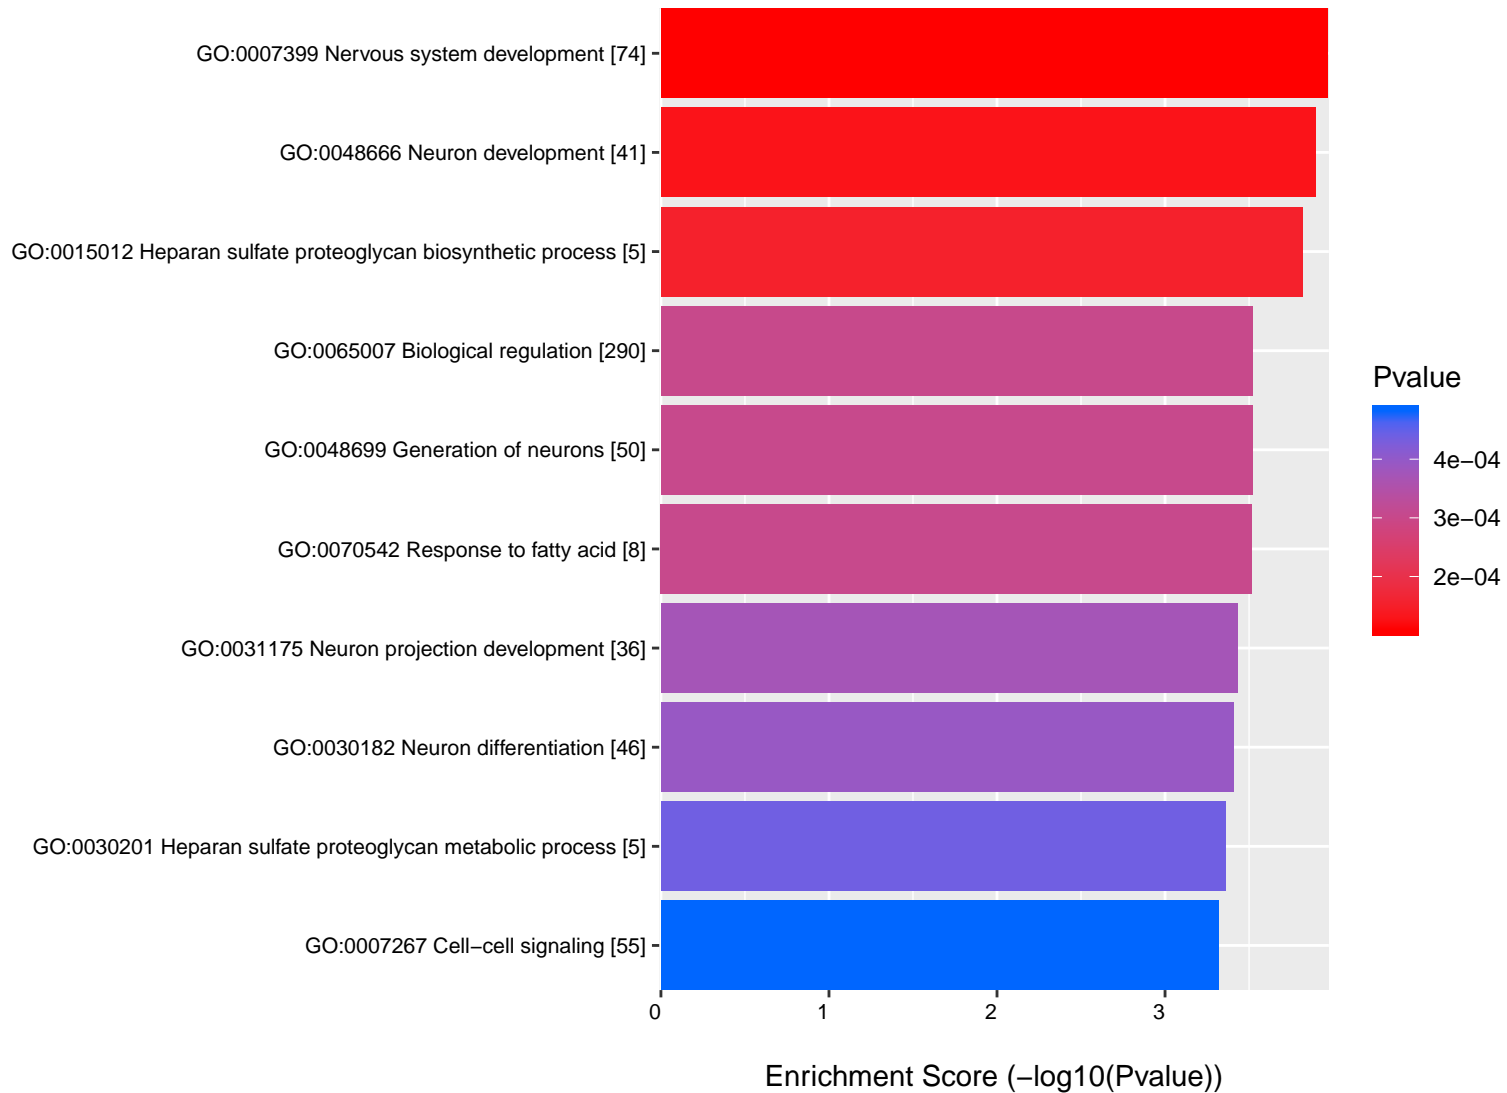

Supplement: s1 [file s1]

Sig GO terms of DE gene

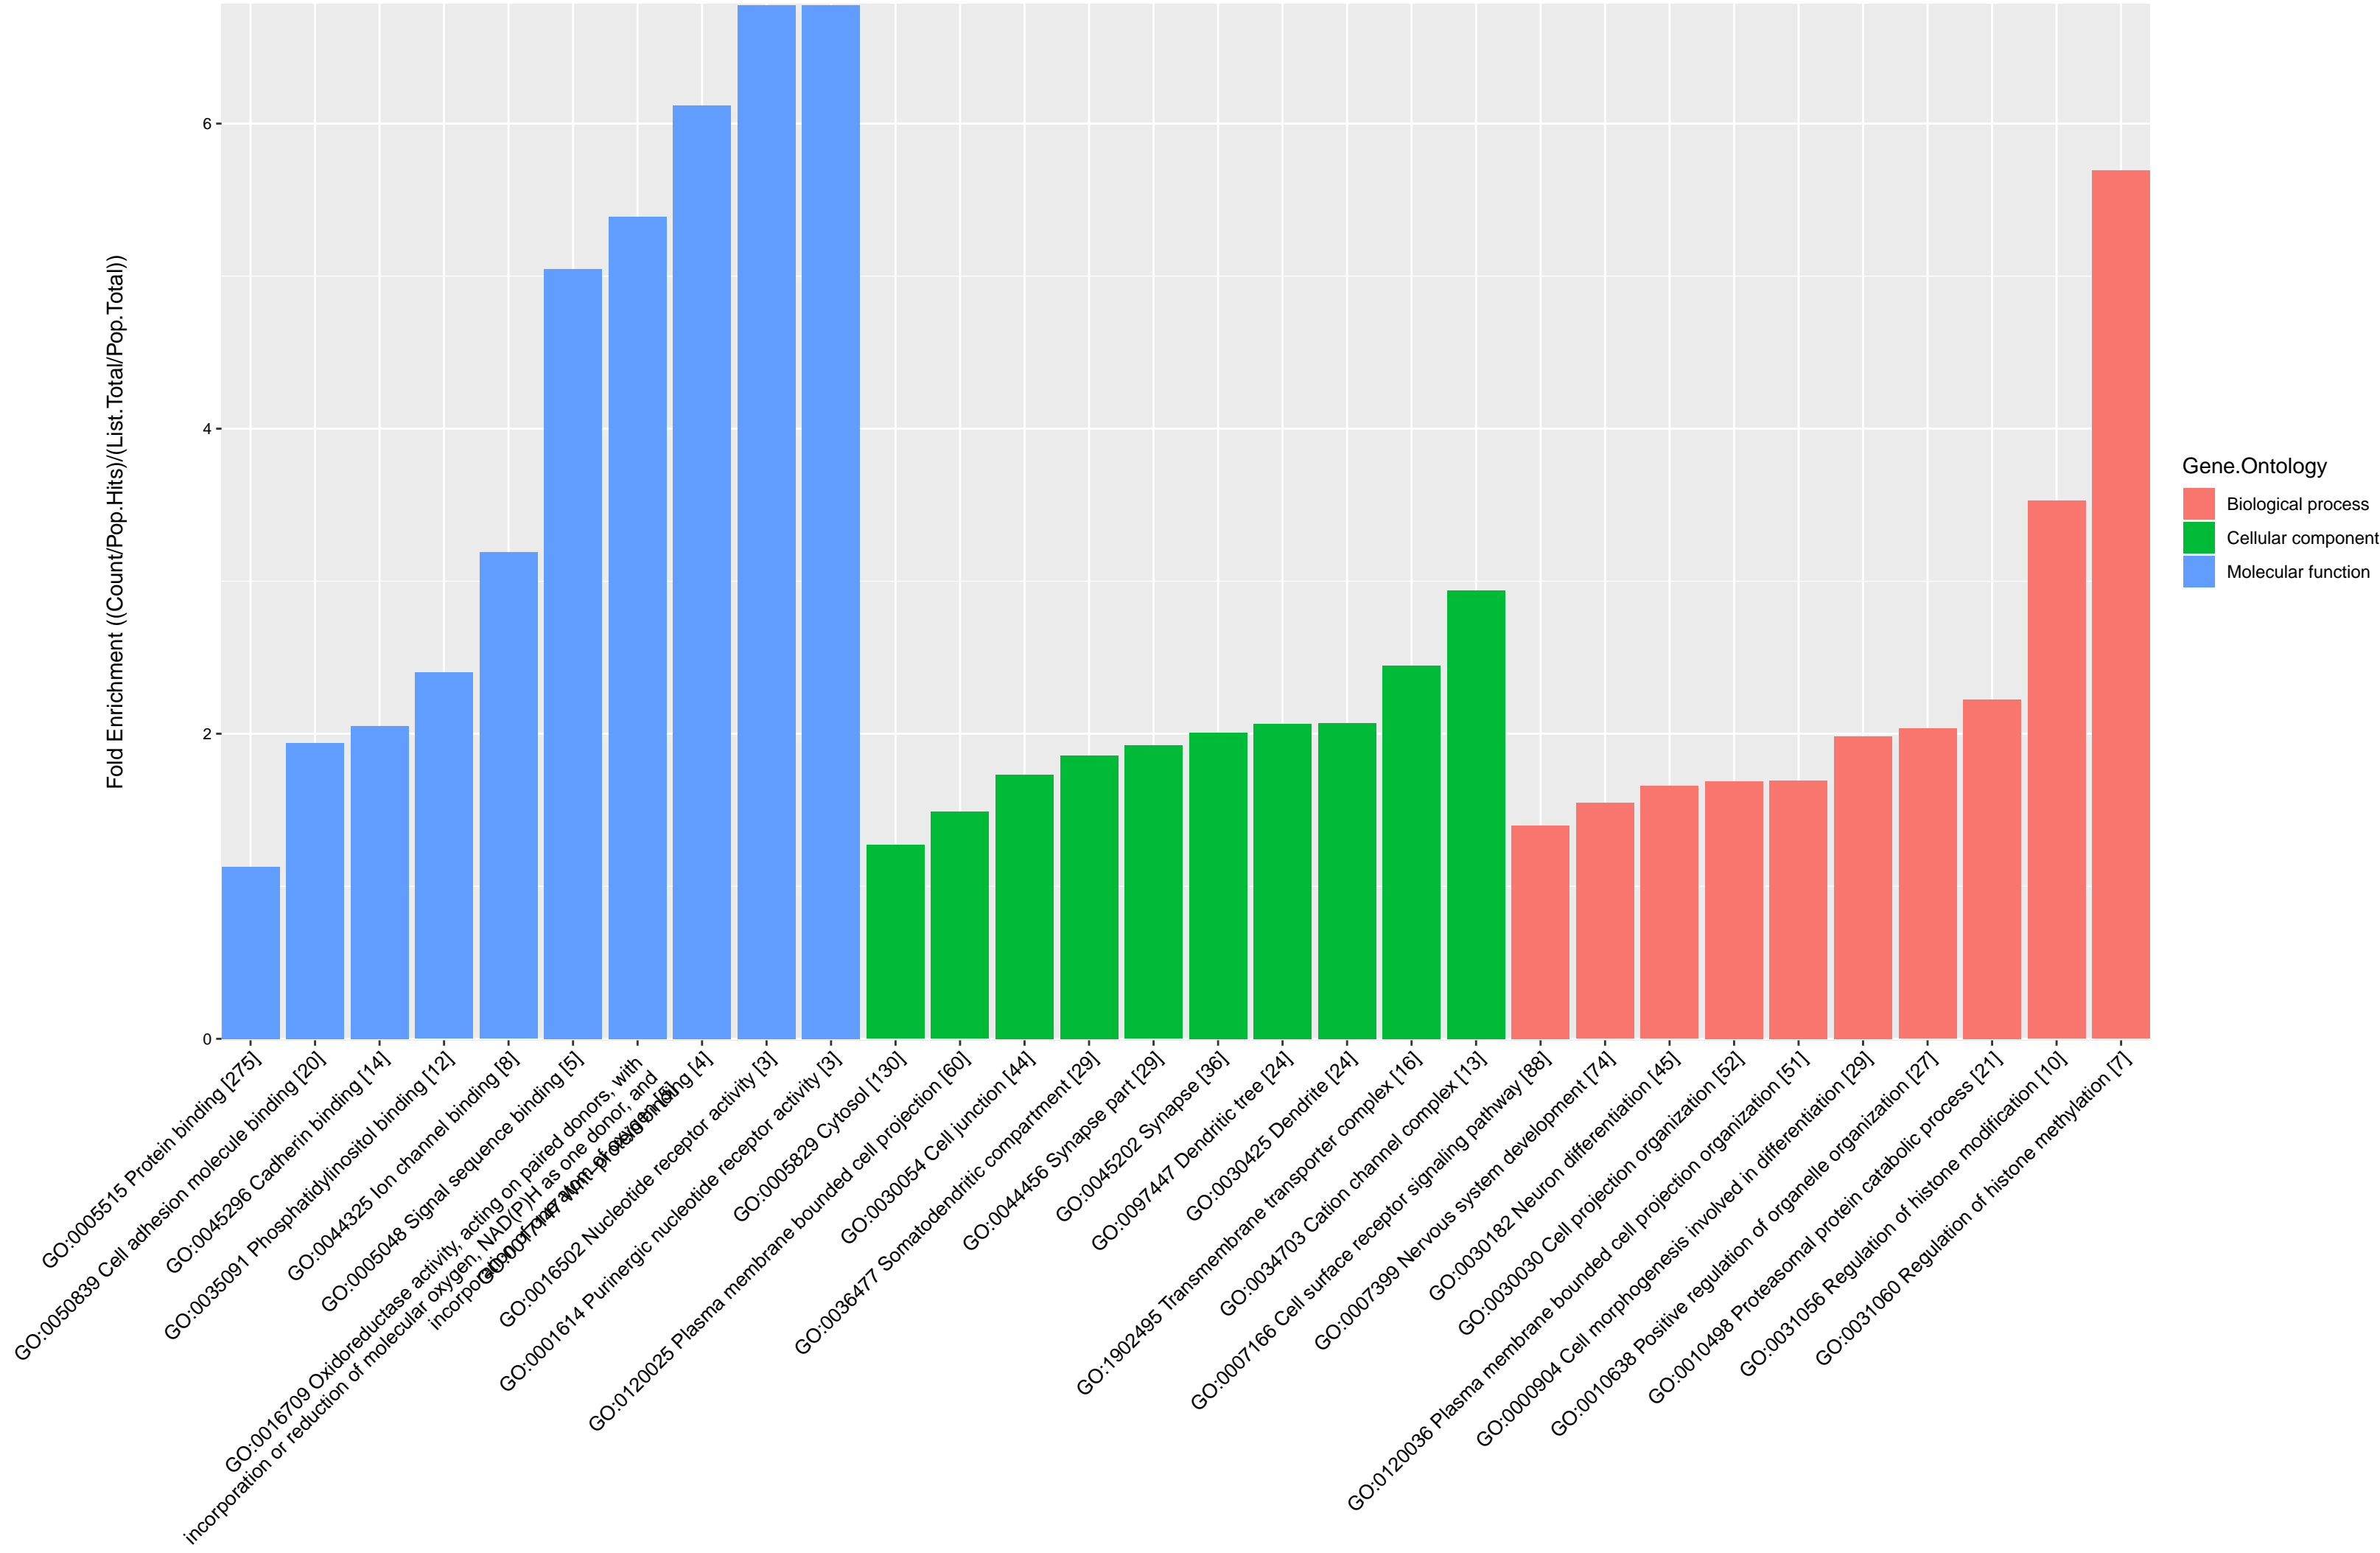

Supplement: s1 [file s1]

Sig GO terms of DE gene

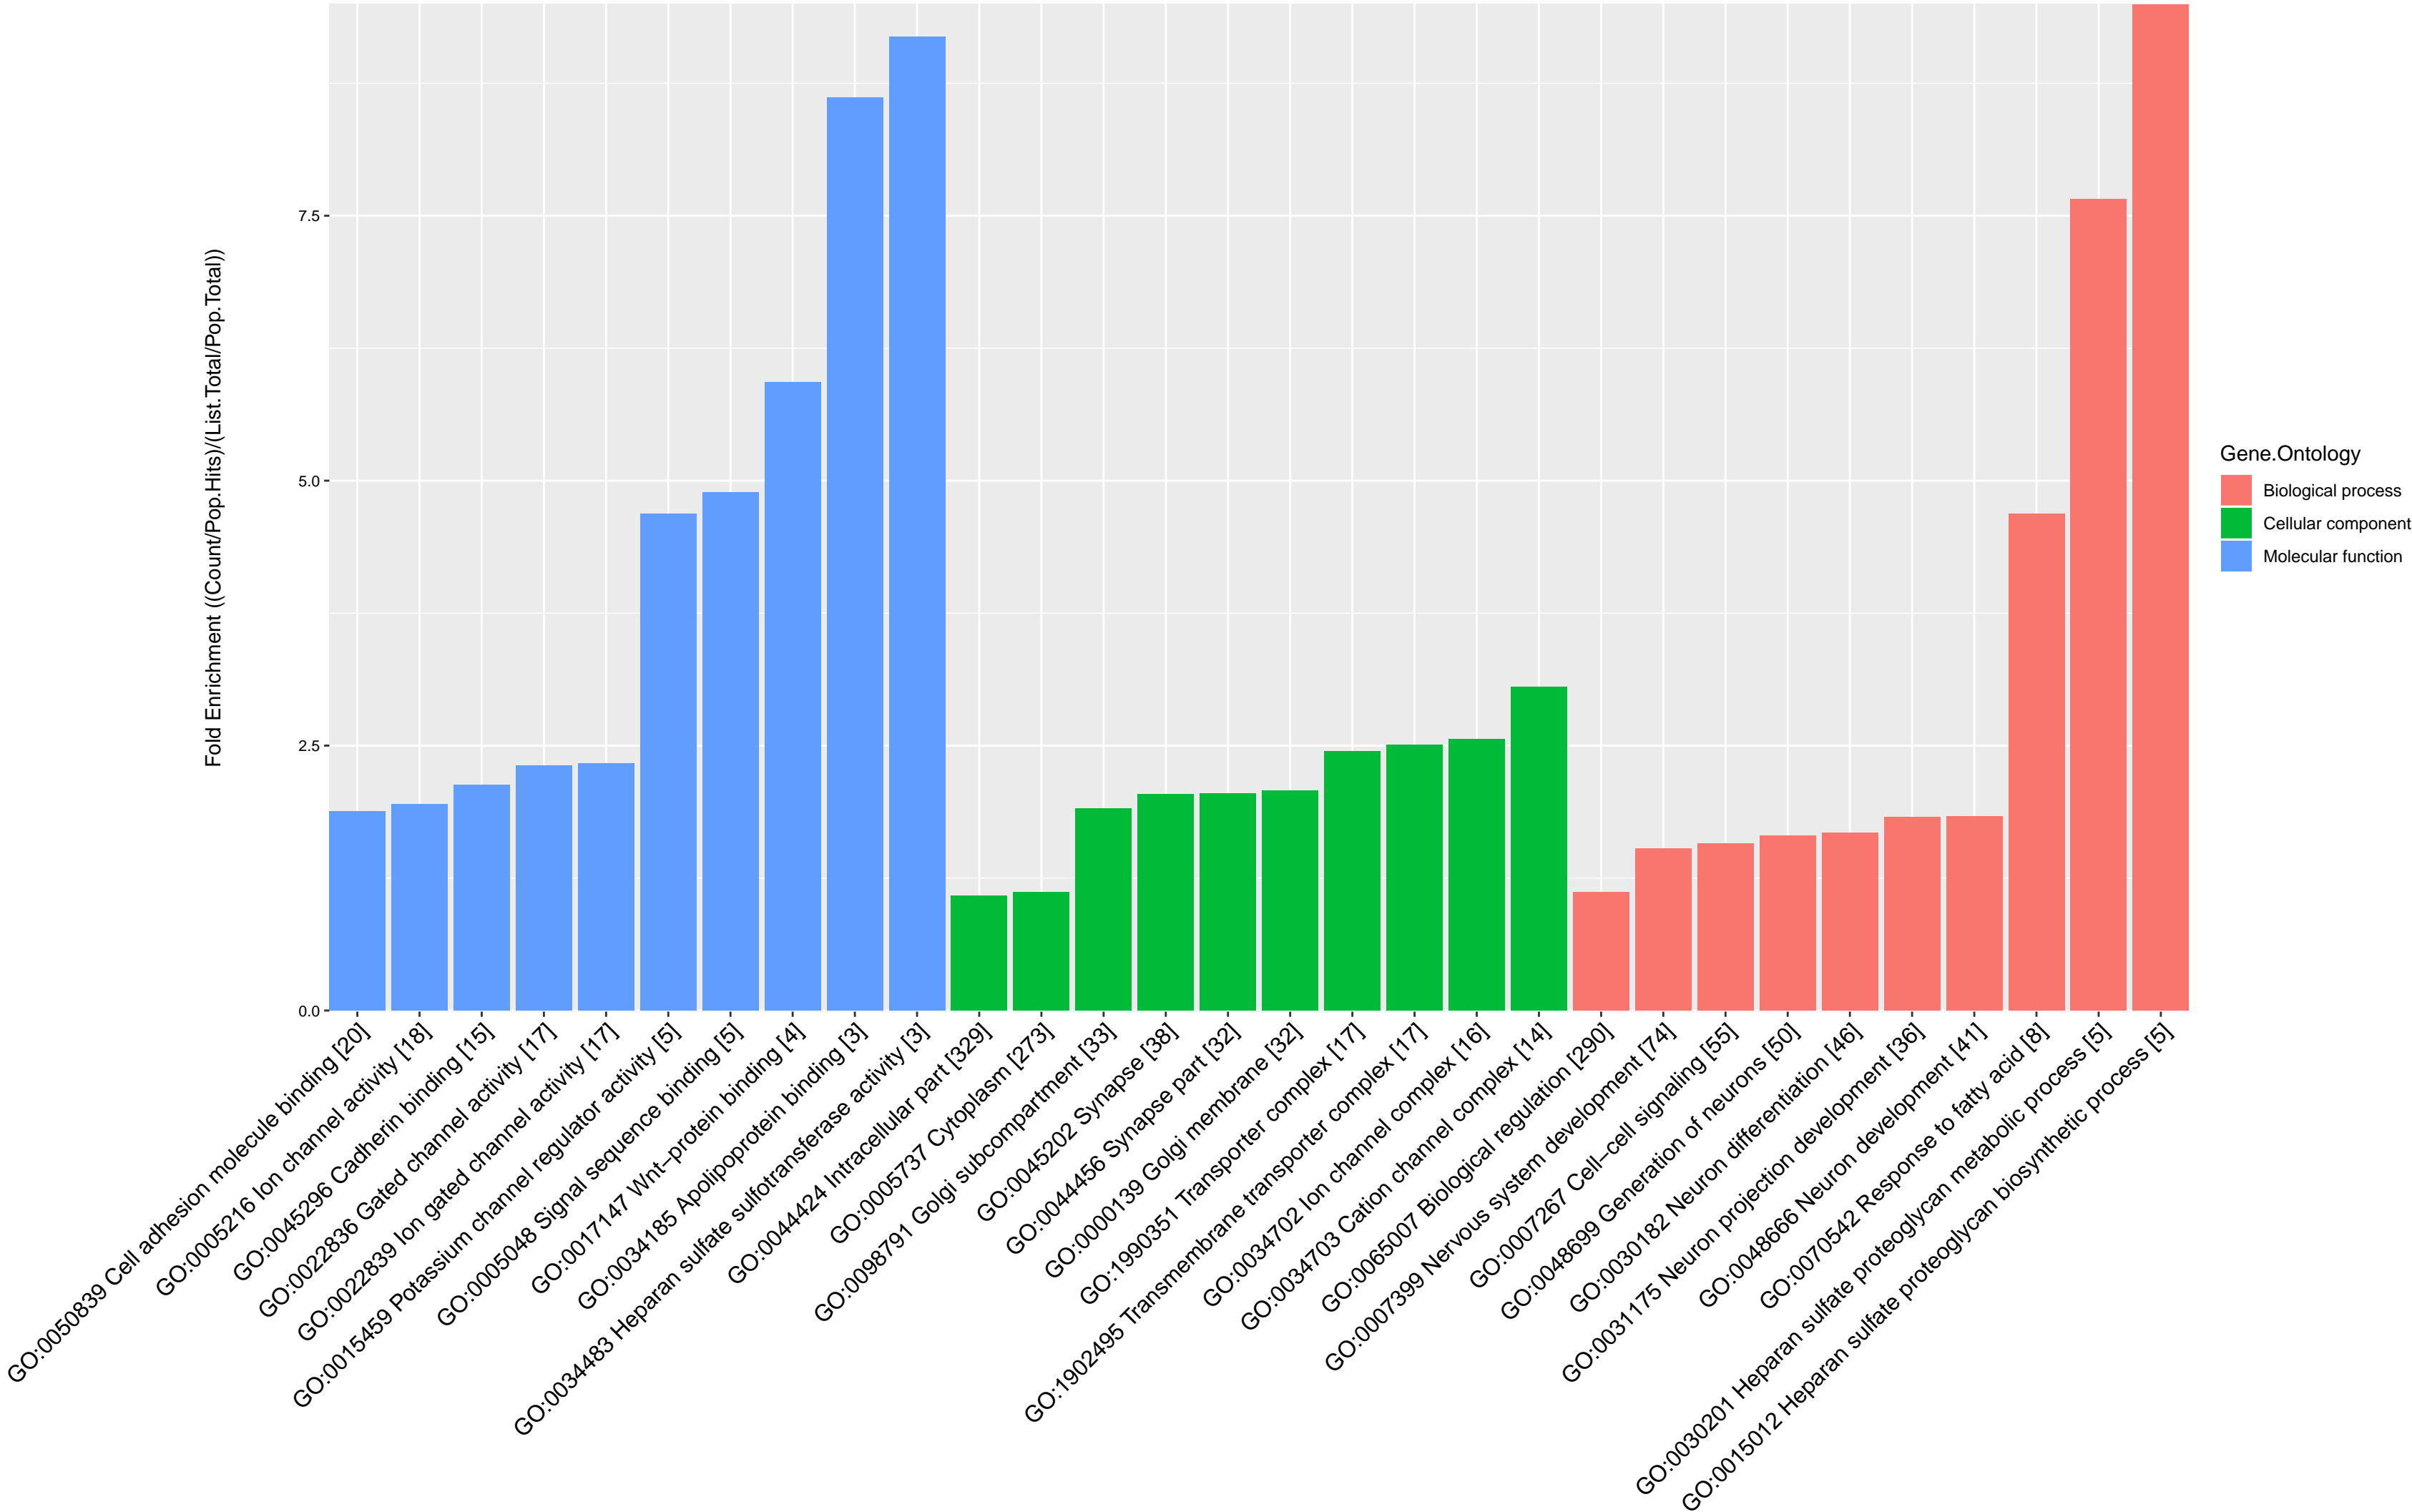

Supplement: s1 [file s1]

# Sig GO terms of DE gene-BP

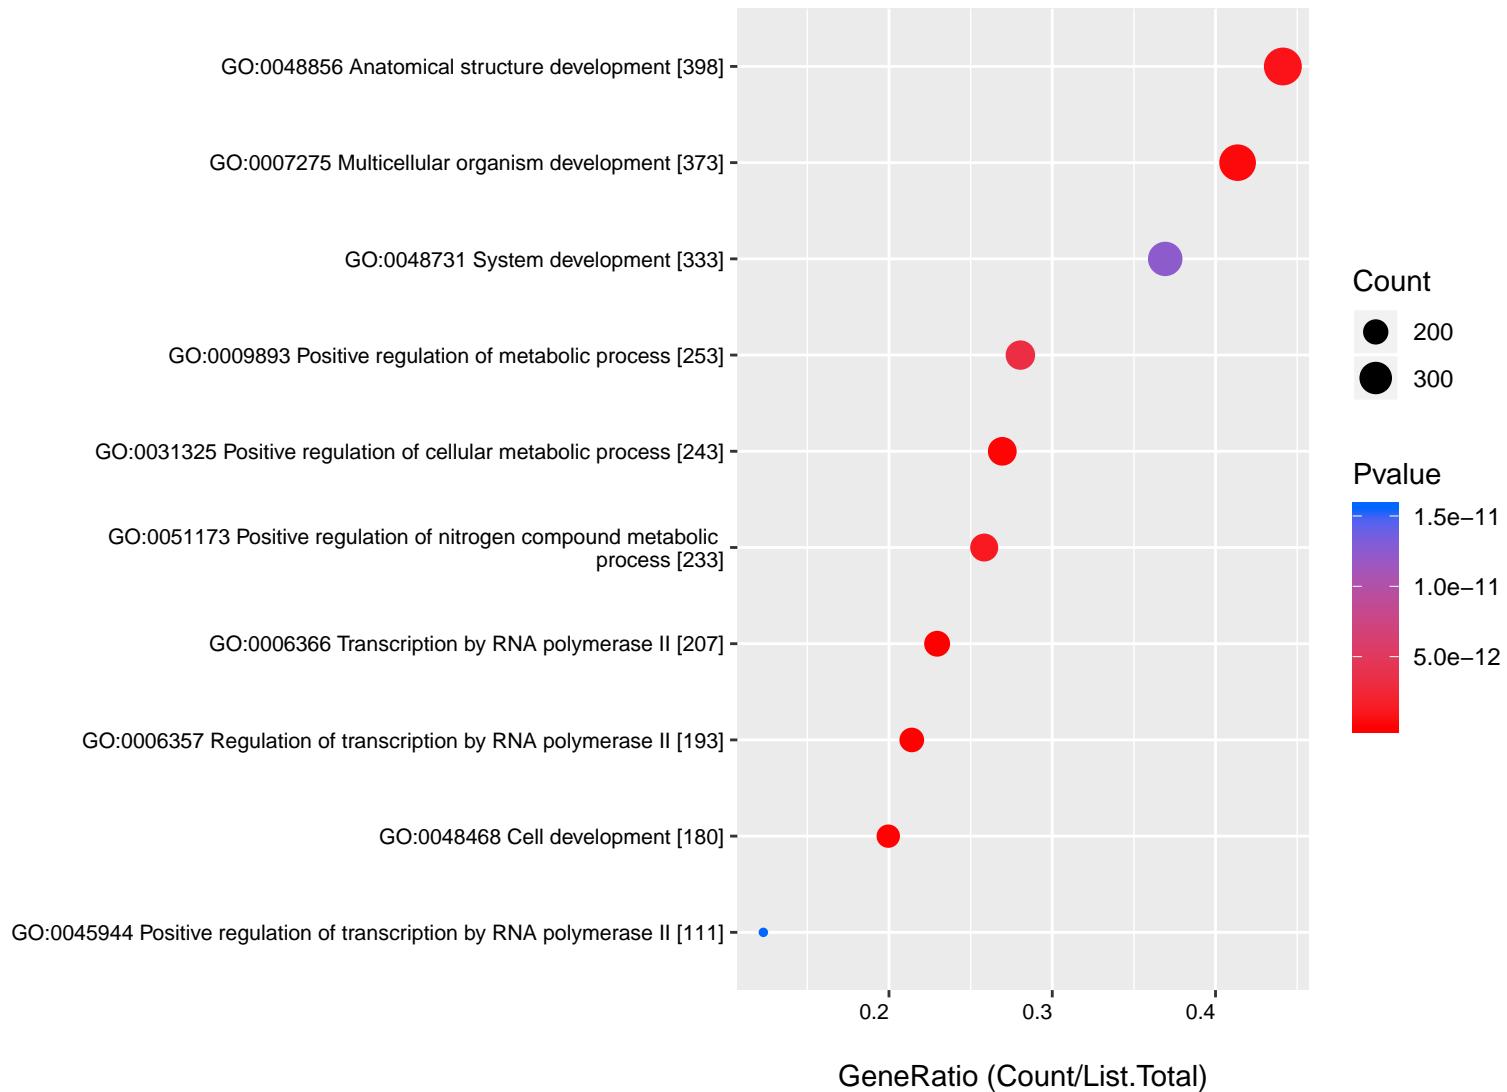

Supplement: s1 [file s1]

# GO Molecular Function Classification

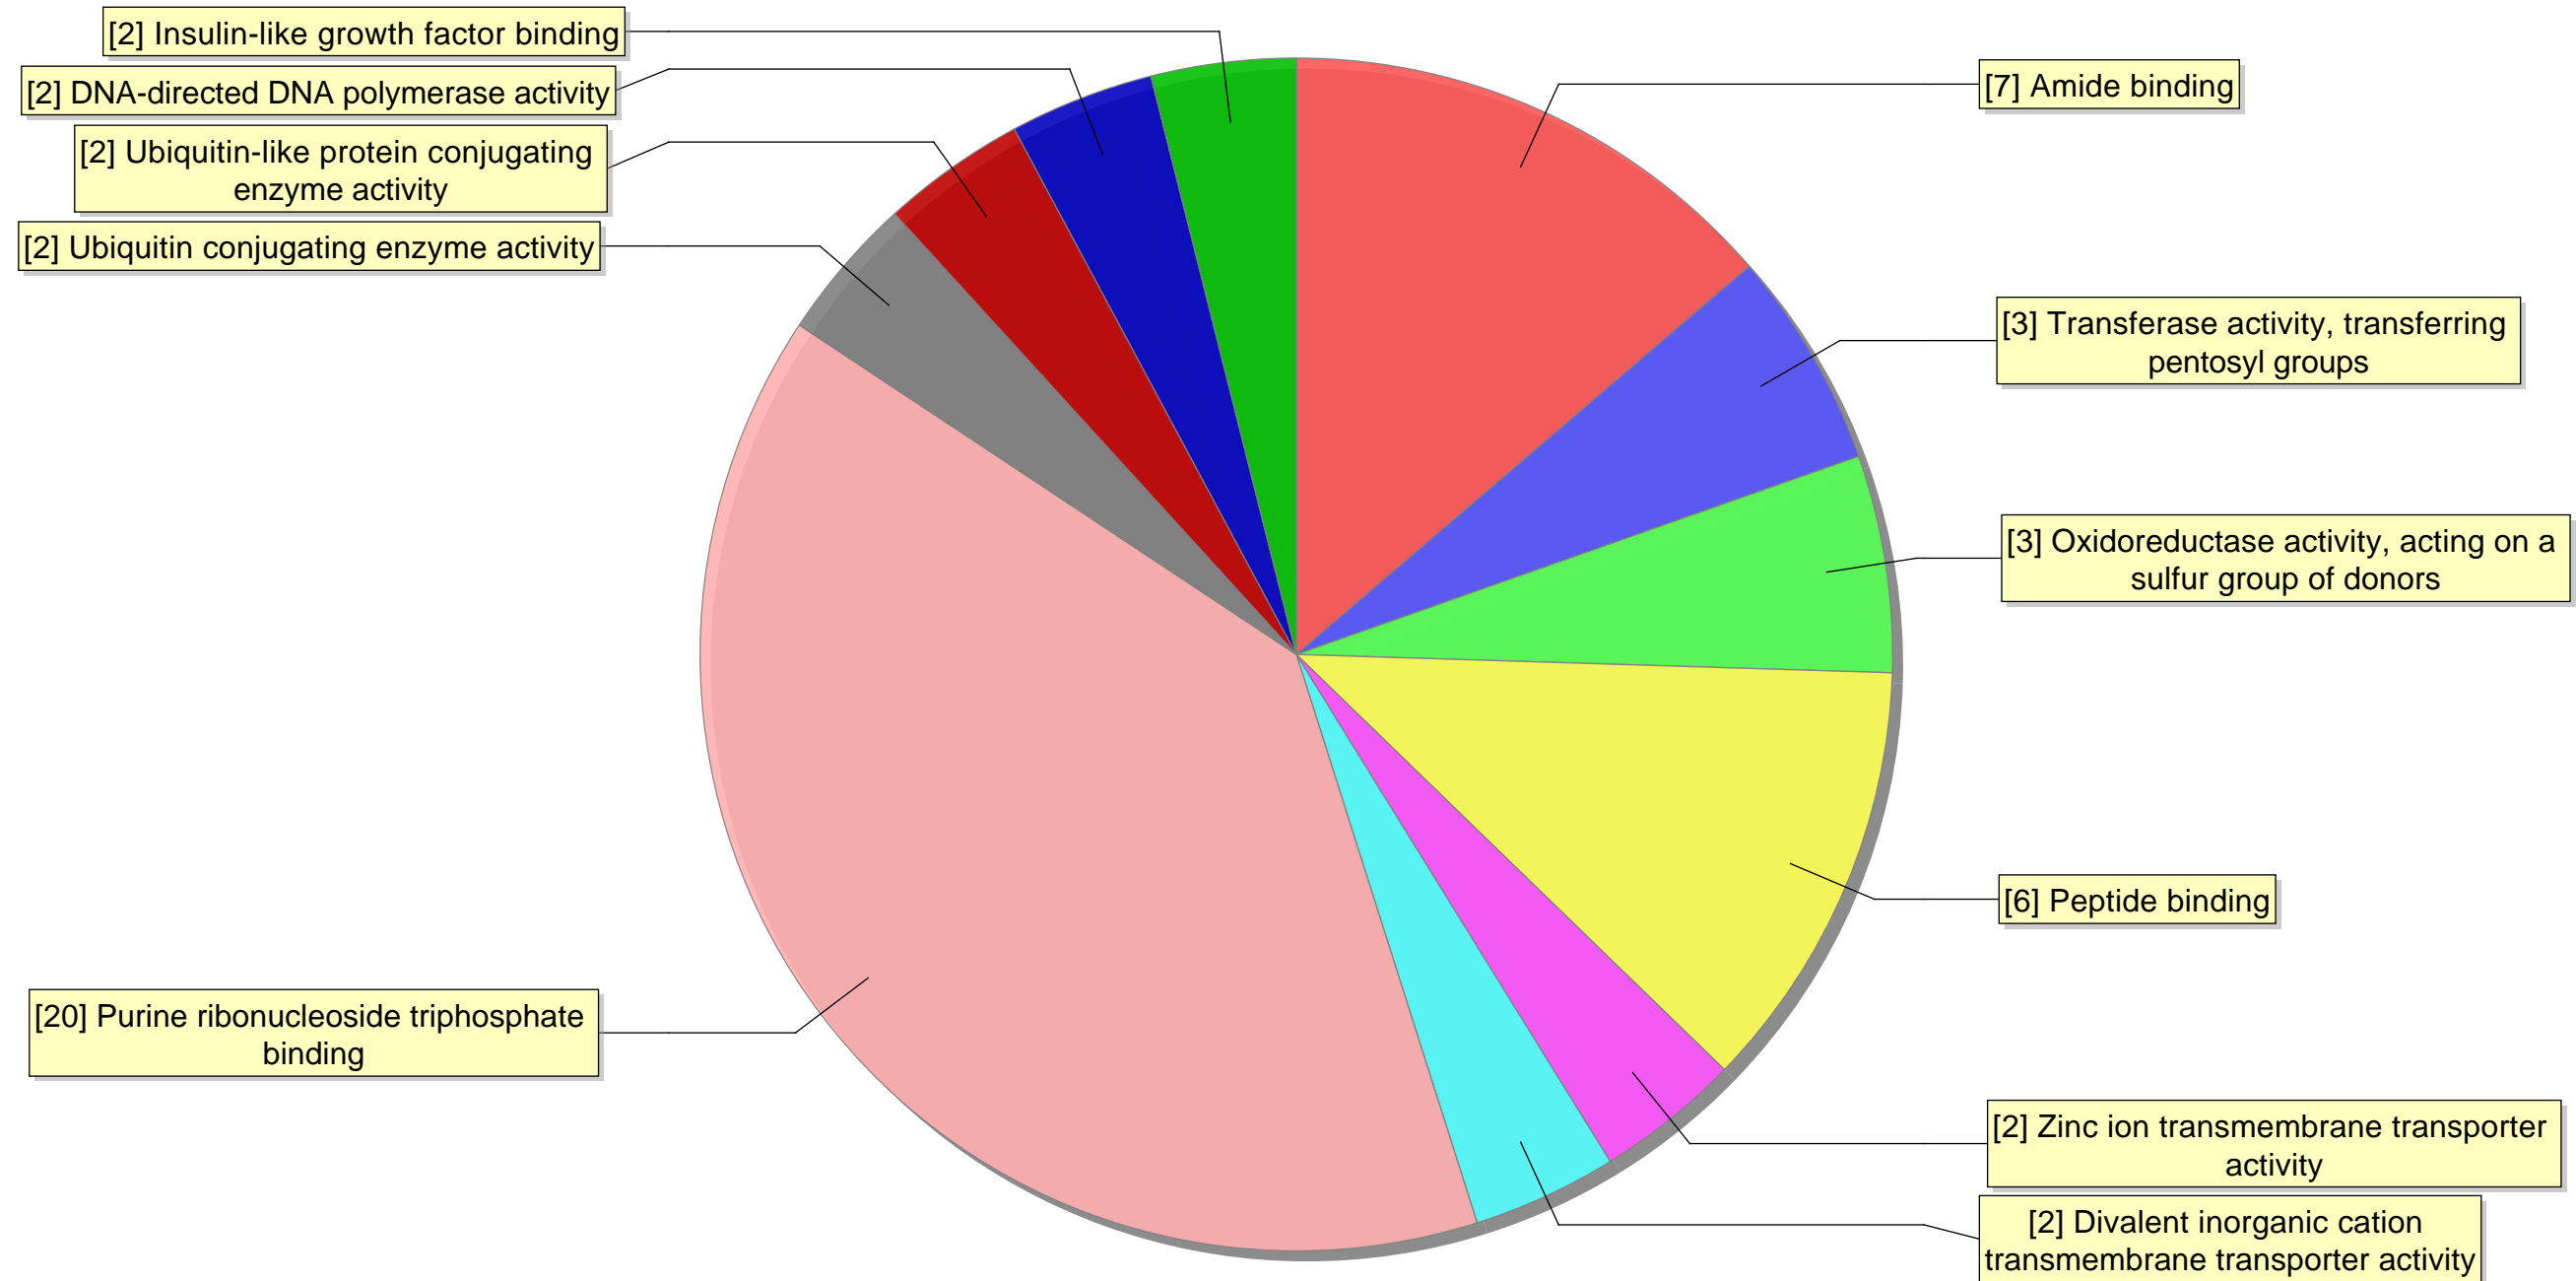

Supplement: s1 [file s1]

# Sig pathway of DE gene

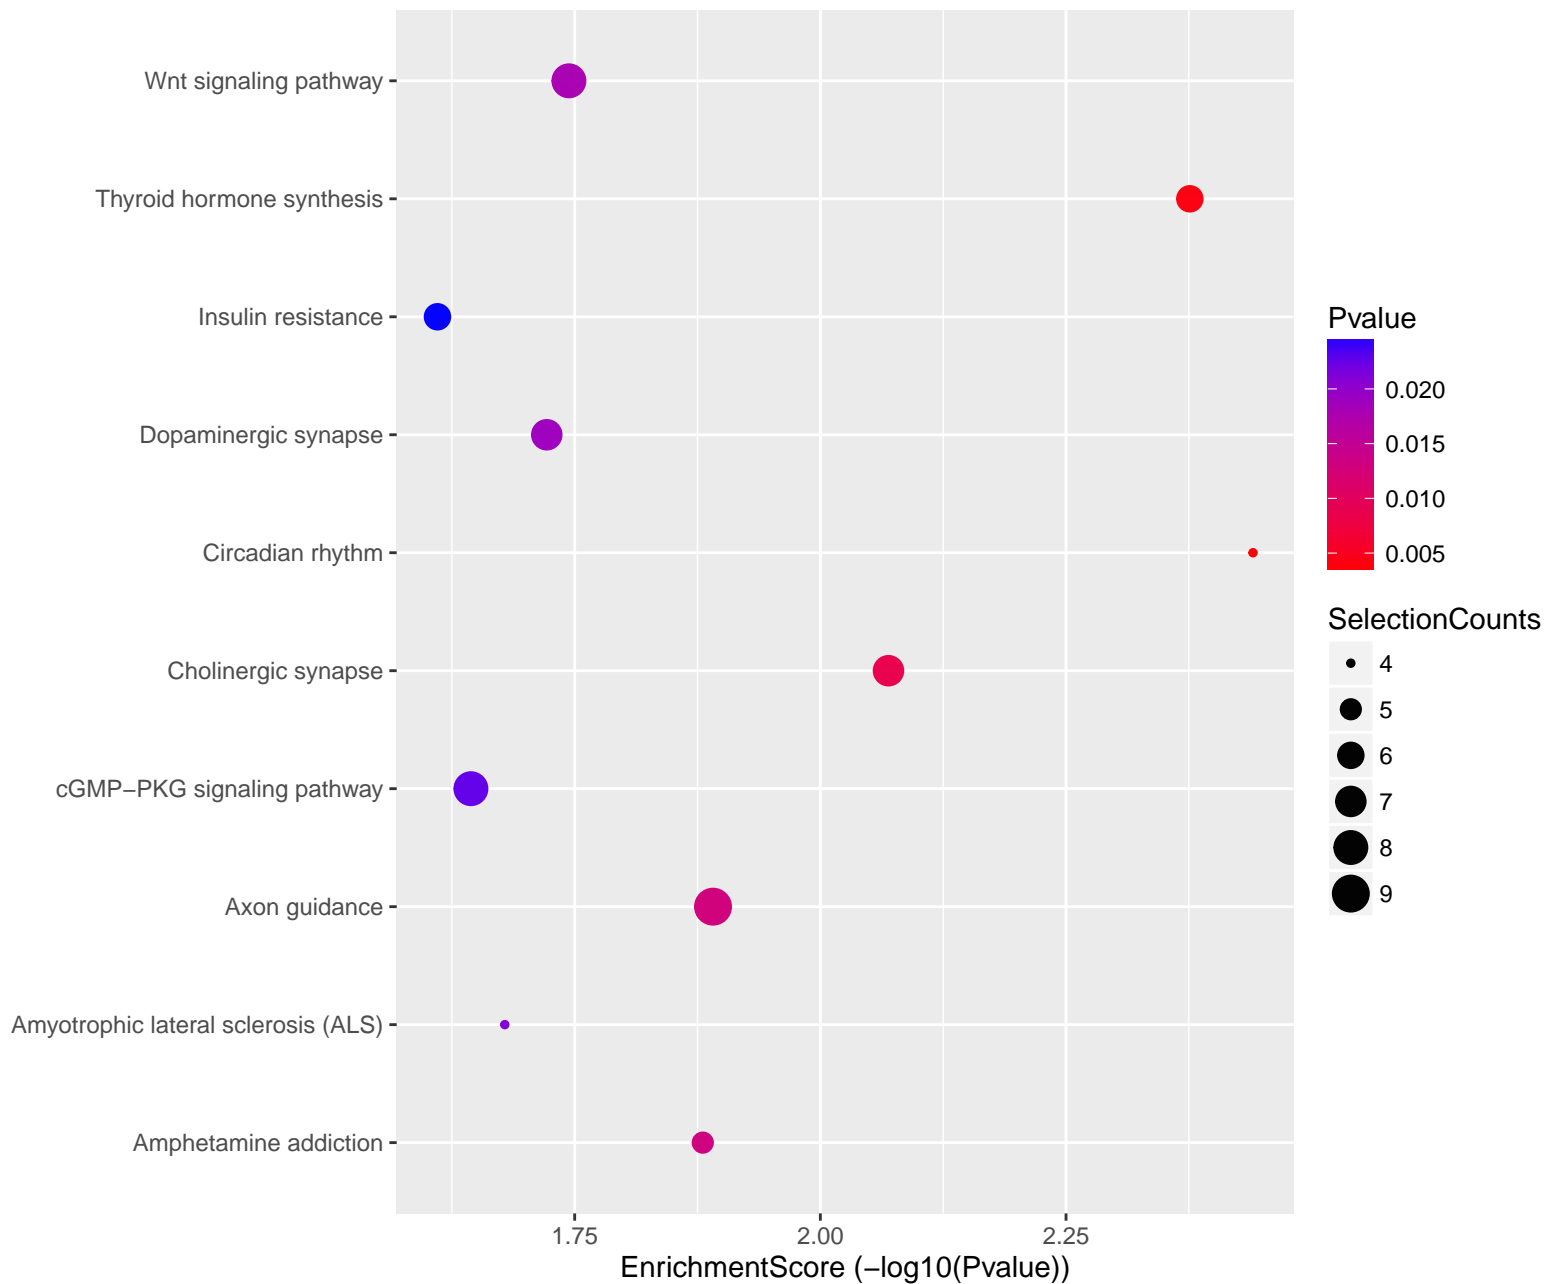

Supplement: s1 [file s1]

# Sig GO terms of DE gene-BP

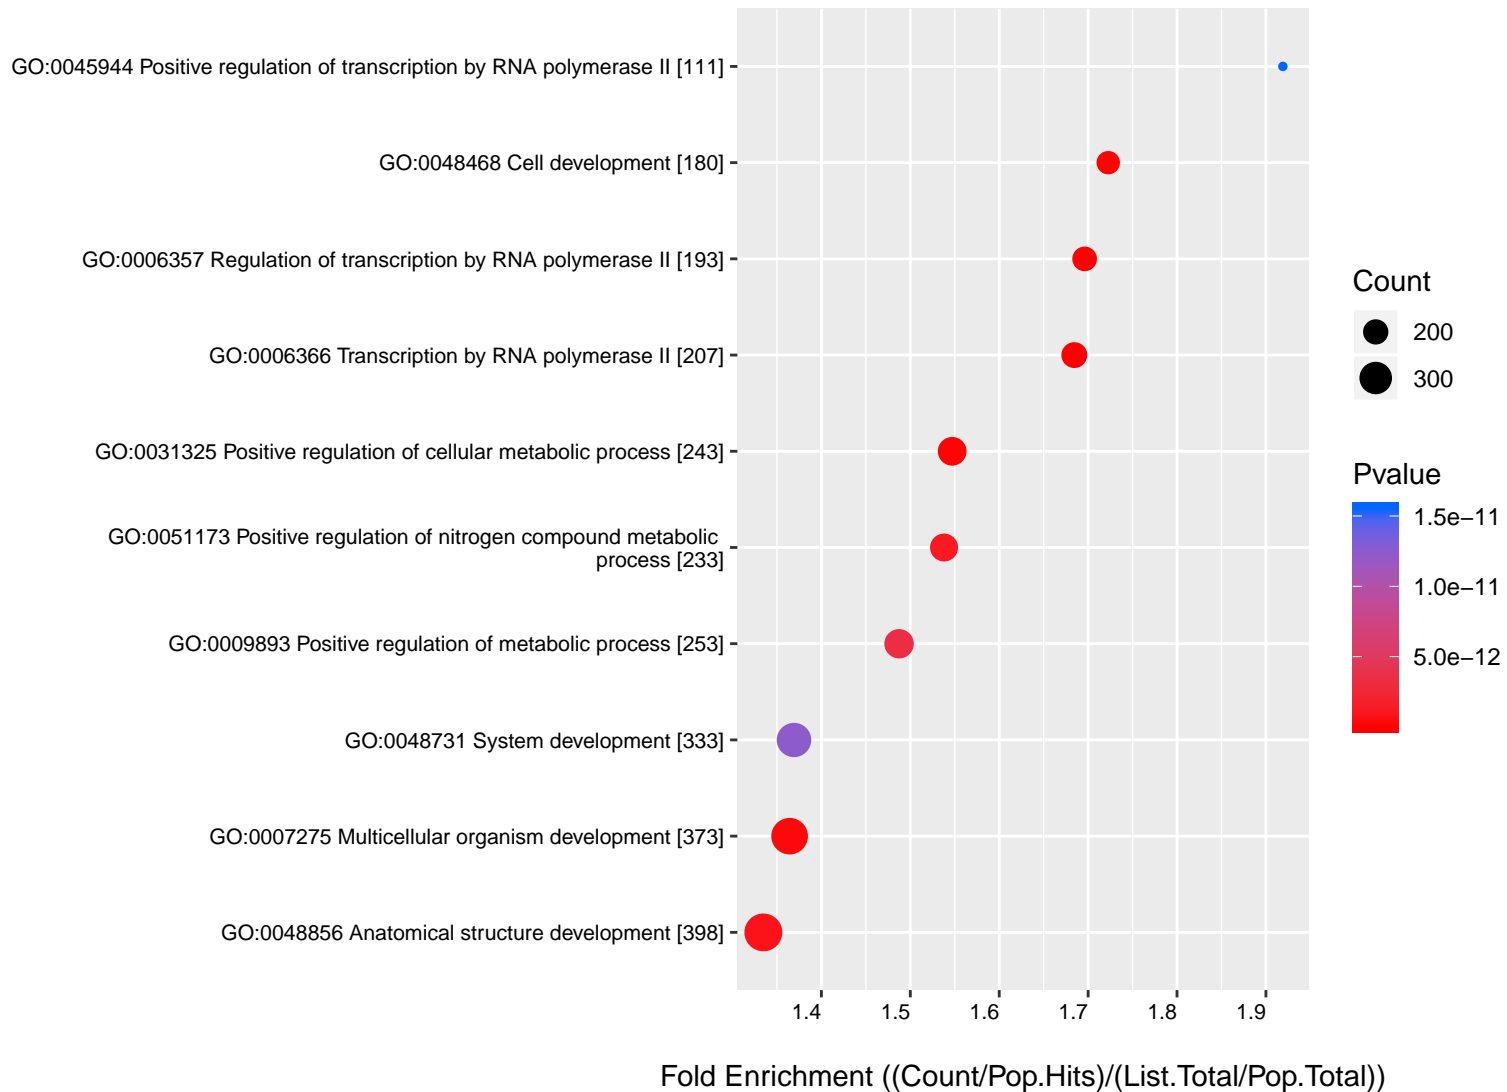

Supplement: s1 [file s1]

# Sig GO terms of DE gene-BP

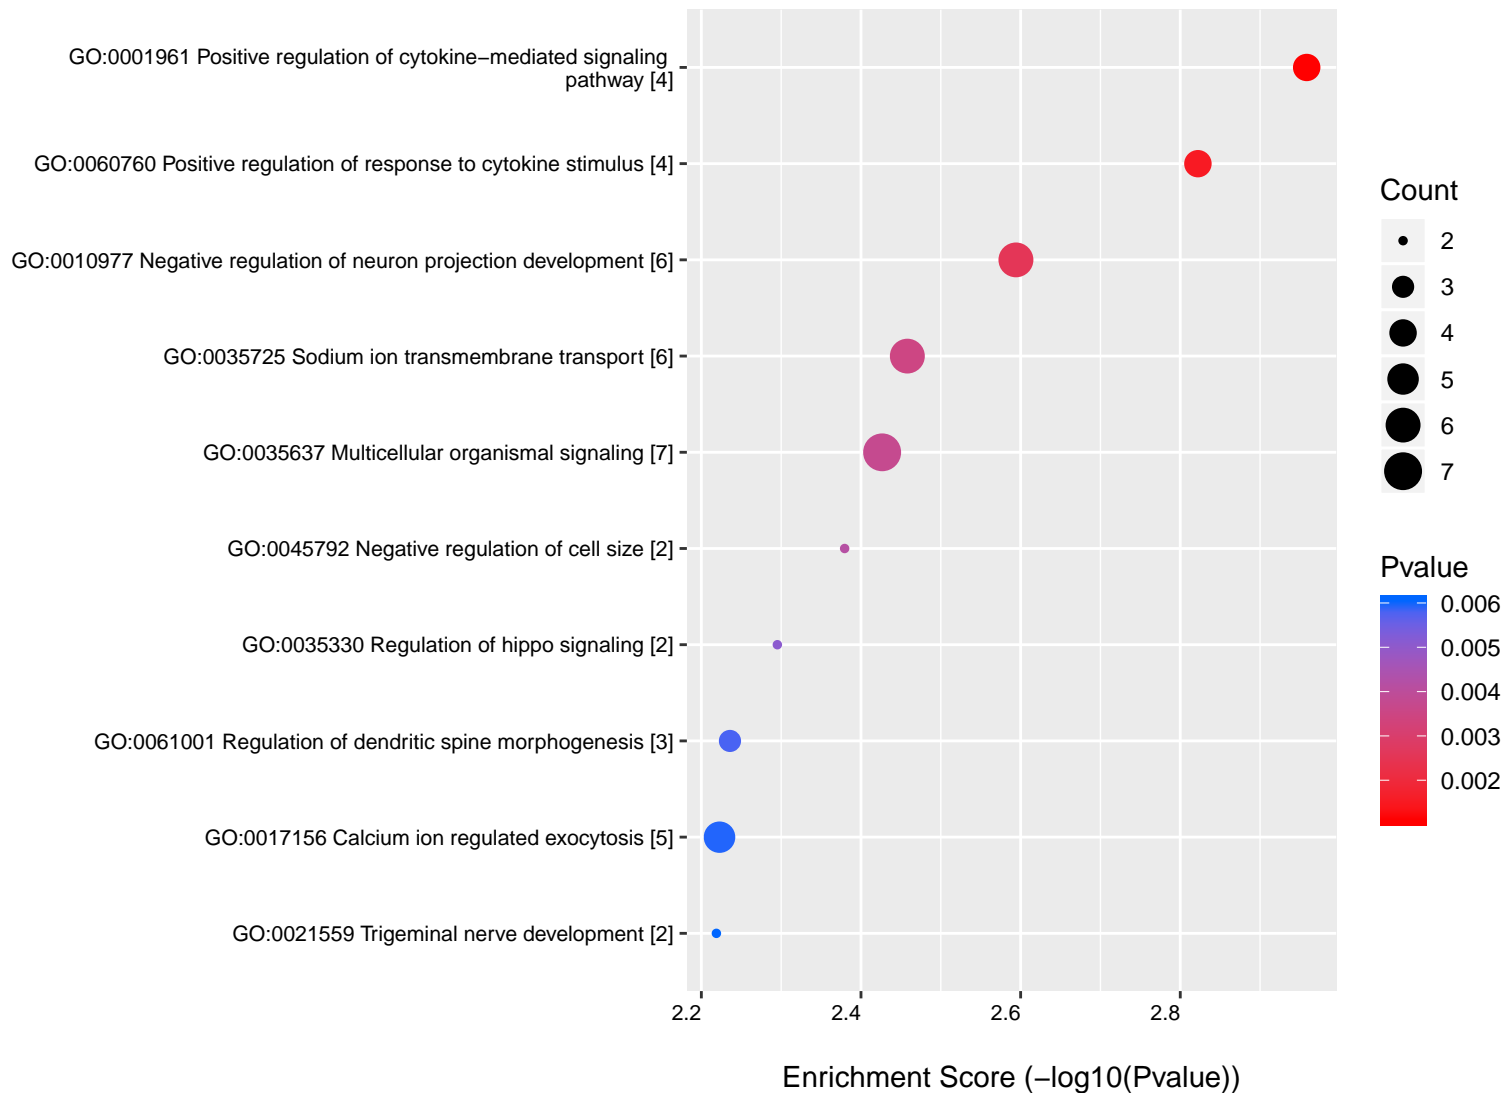

Supplement: s1 [file s1]

Sig GO terms of DE gene

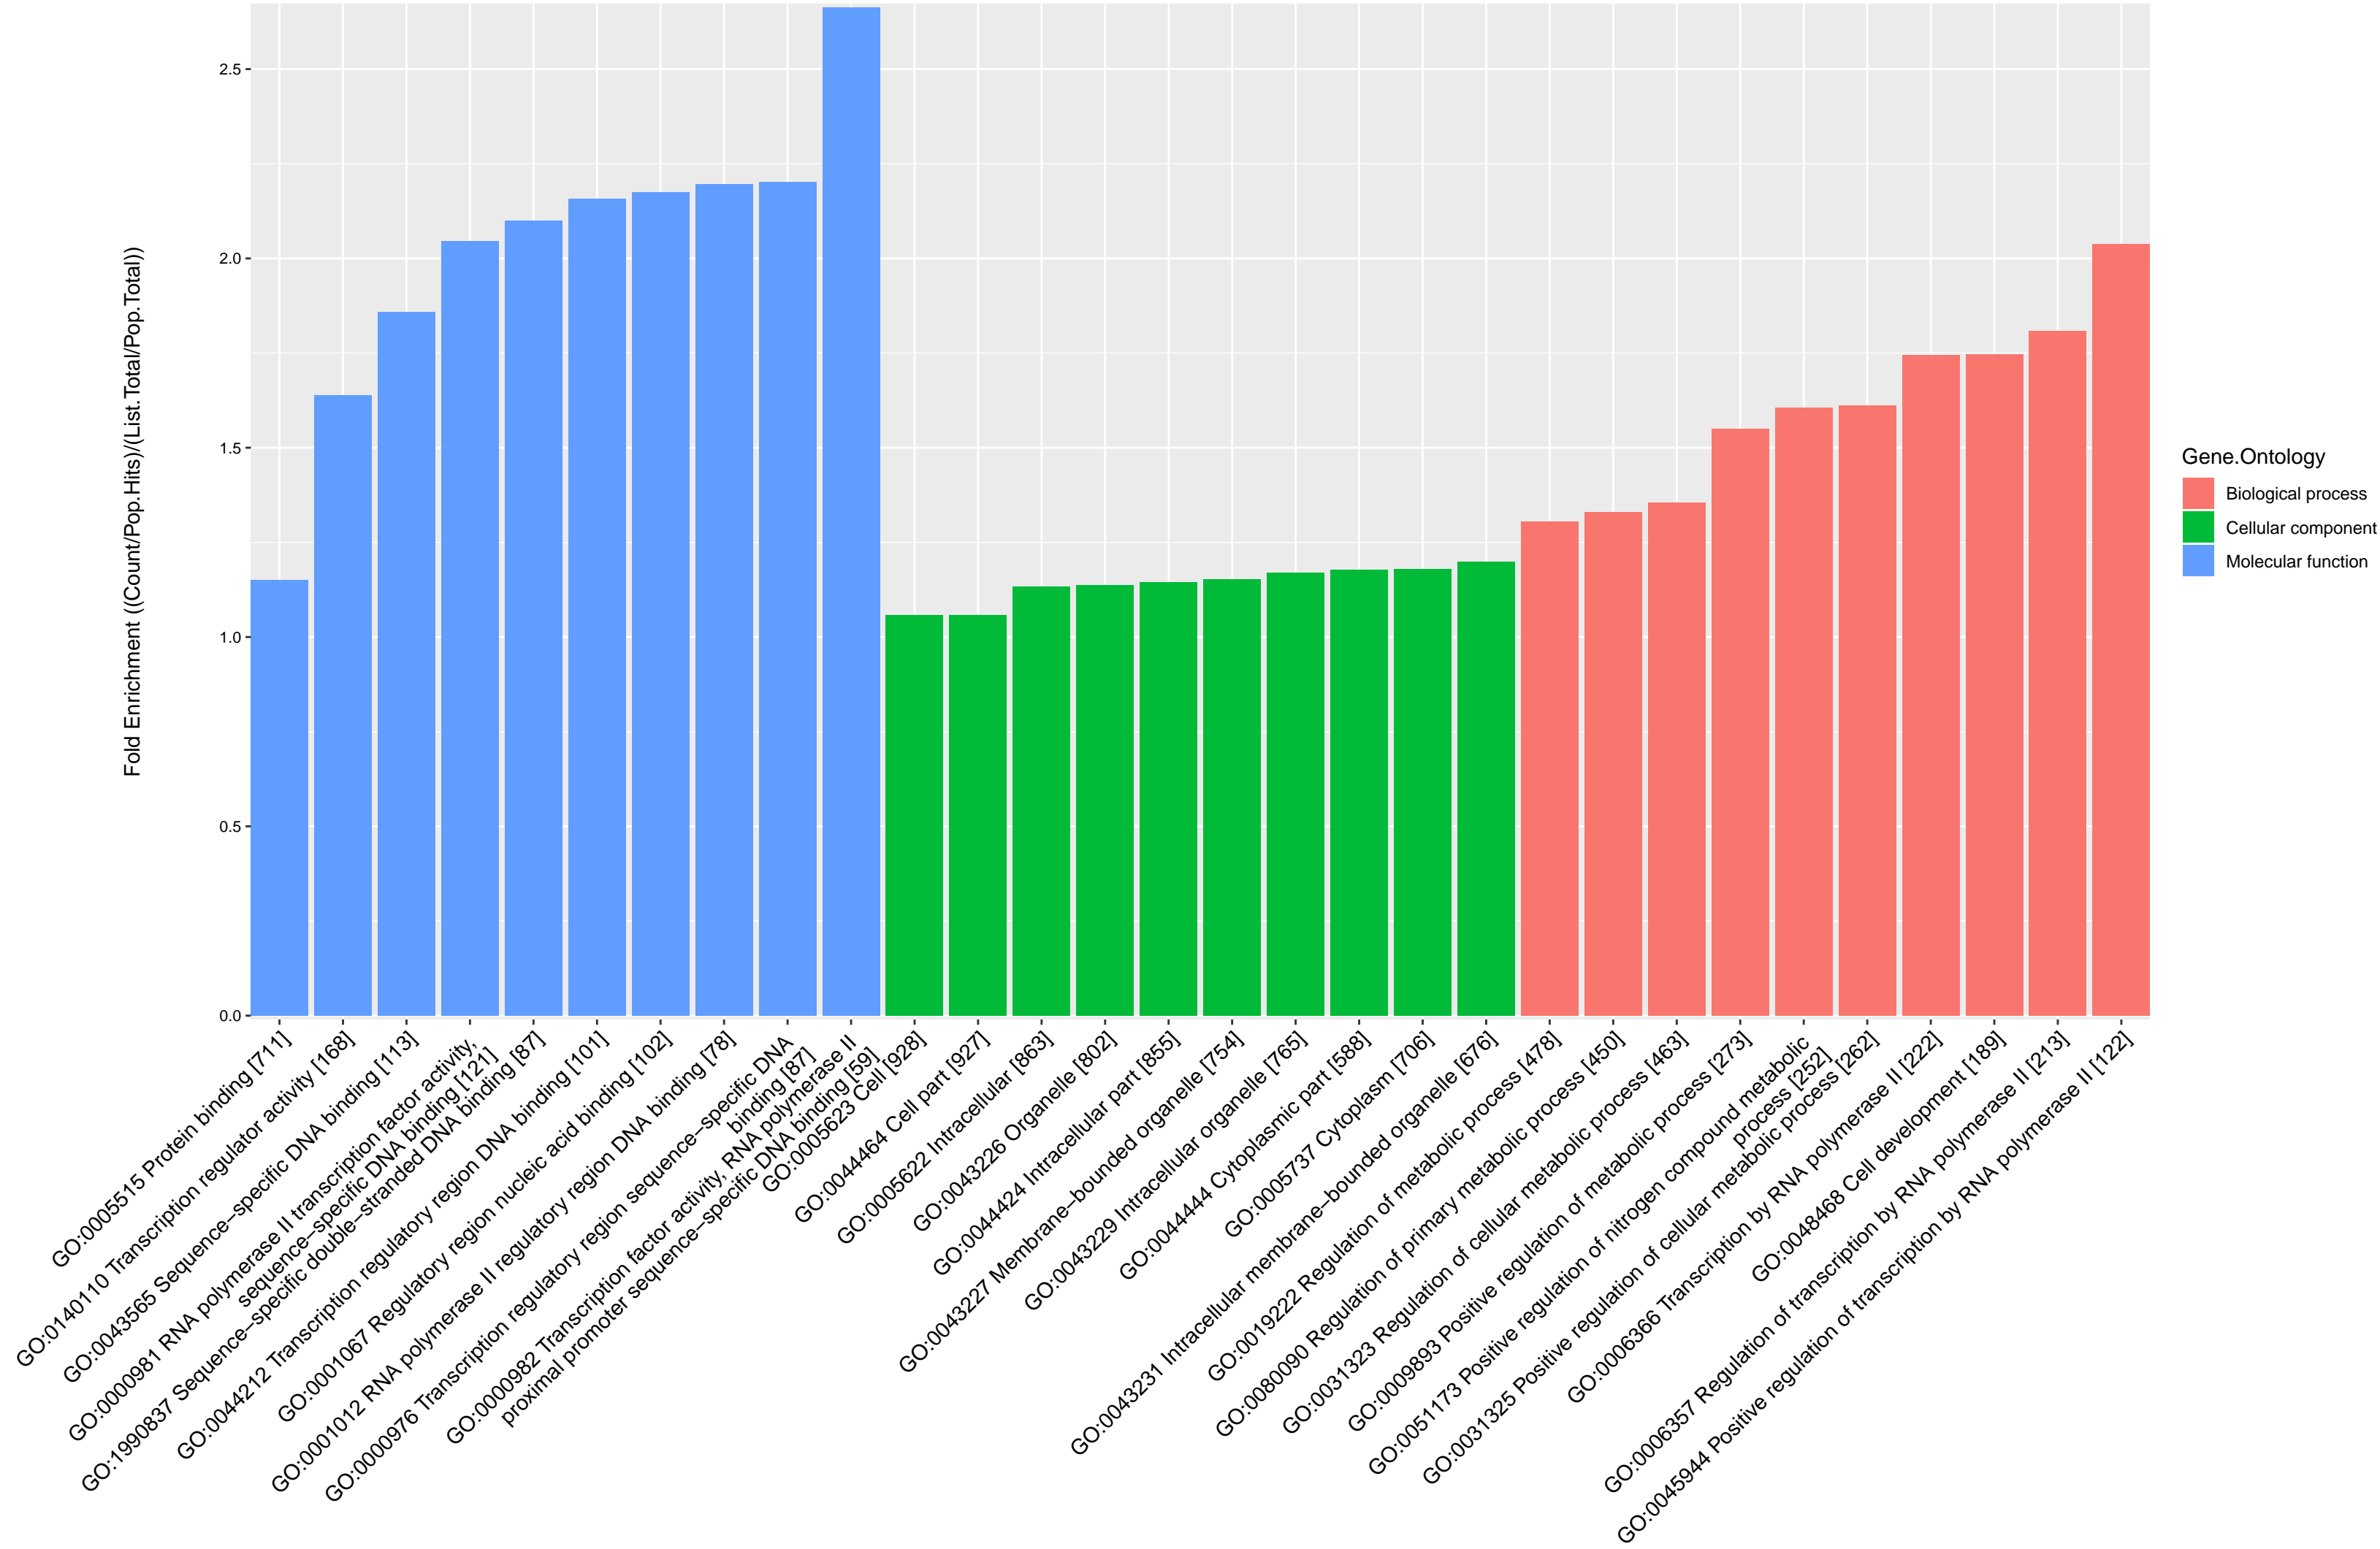

Supplement: s1 [file s1]

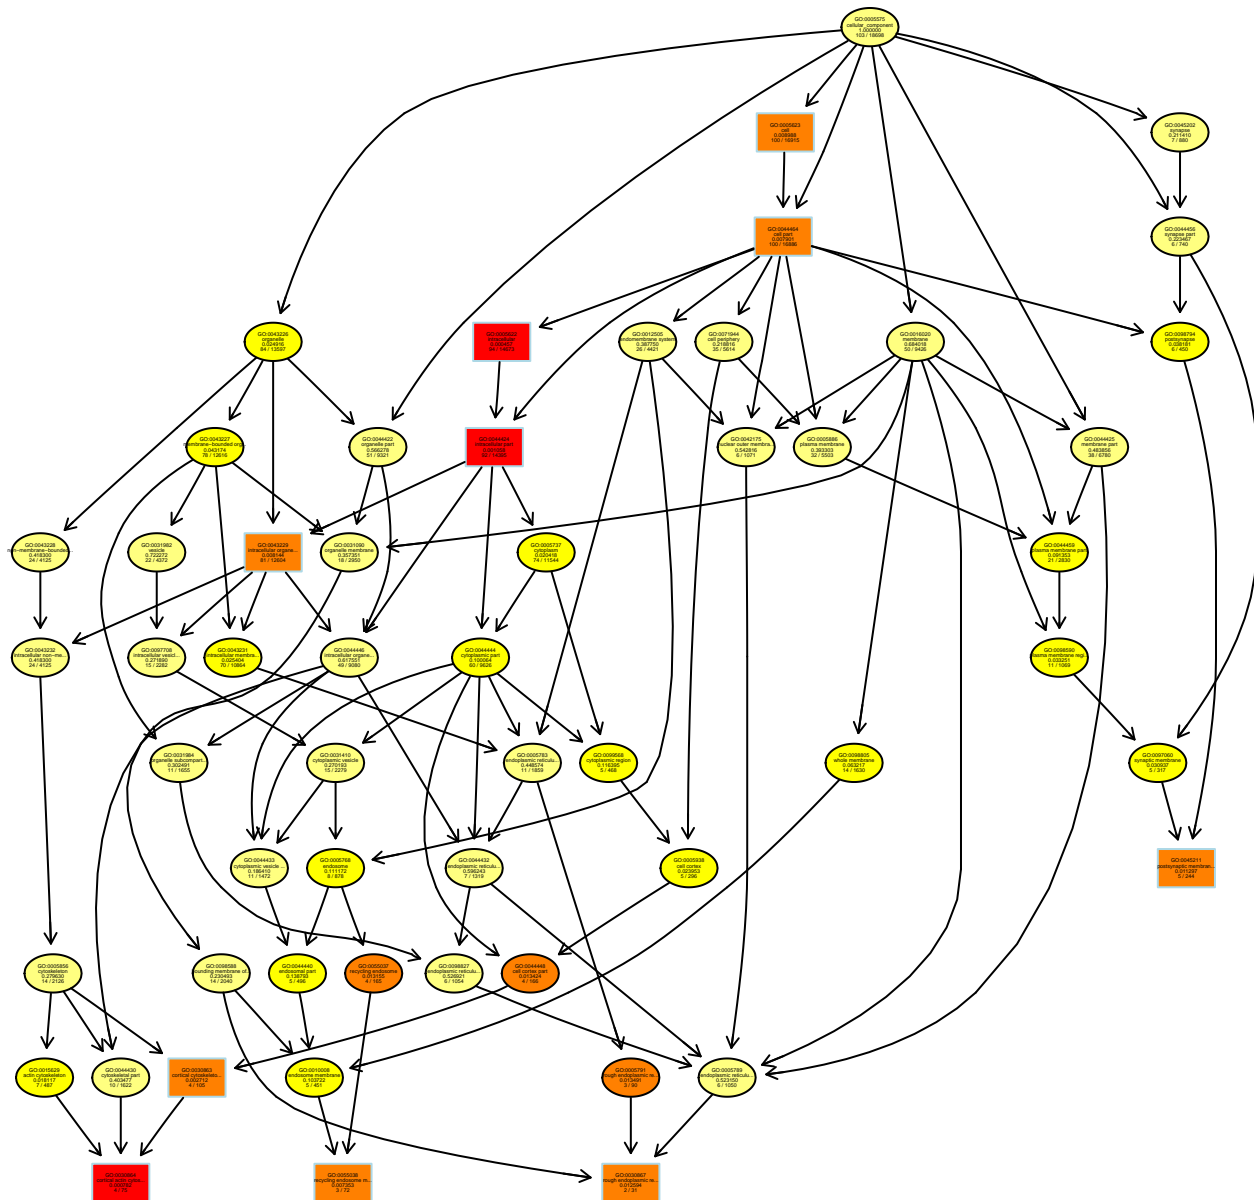

Supplement: s1 [file s1]

# Sig GO terms of DE gene–MF

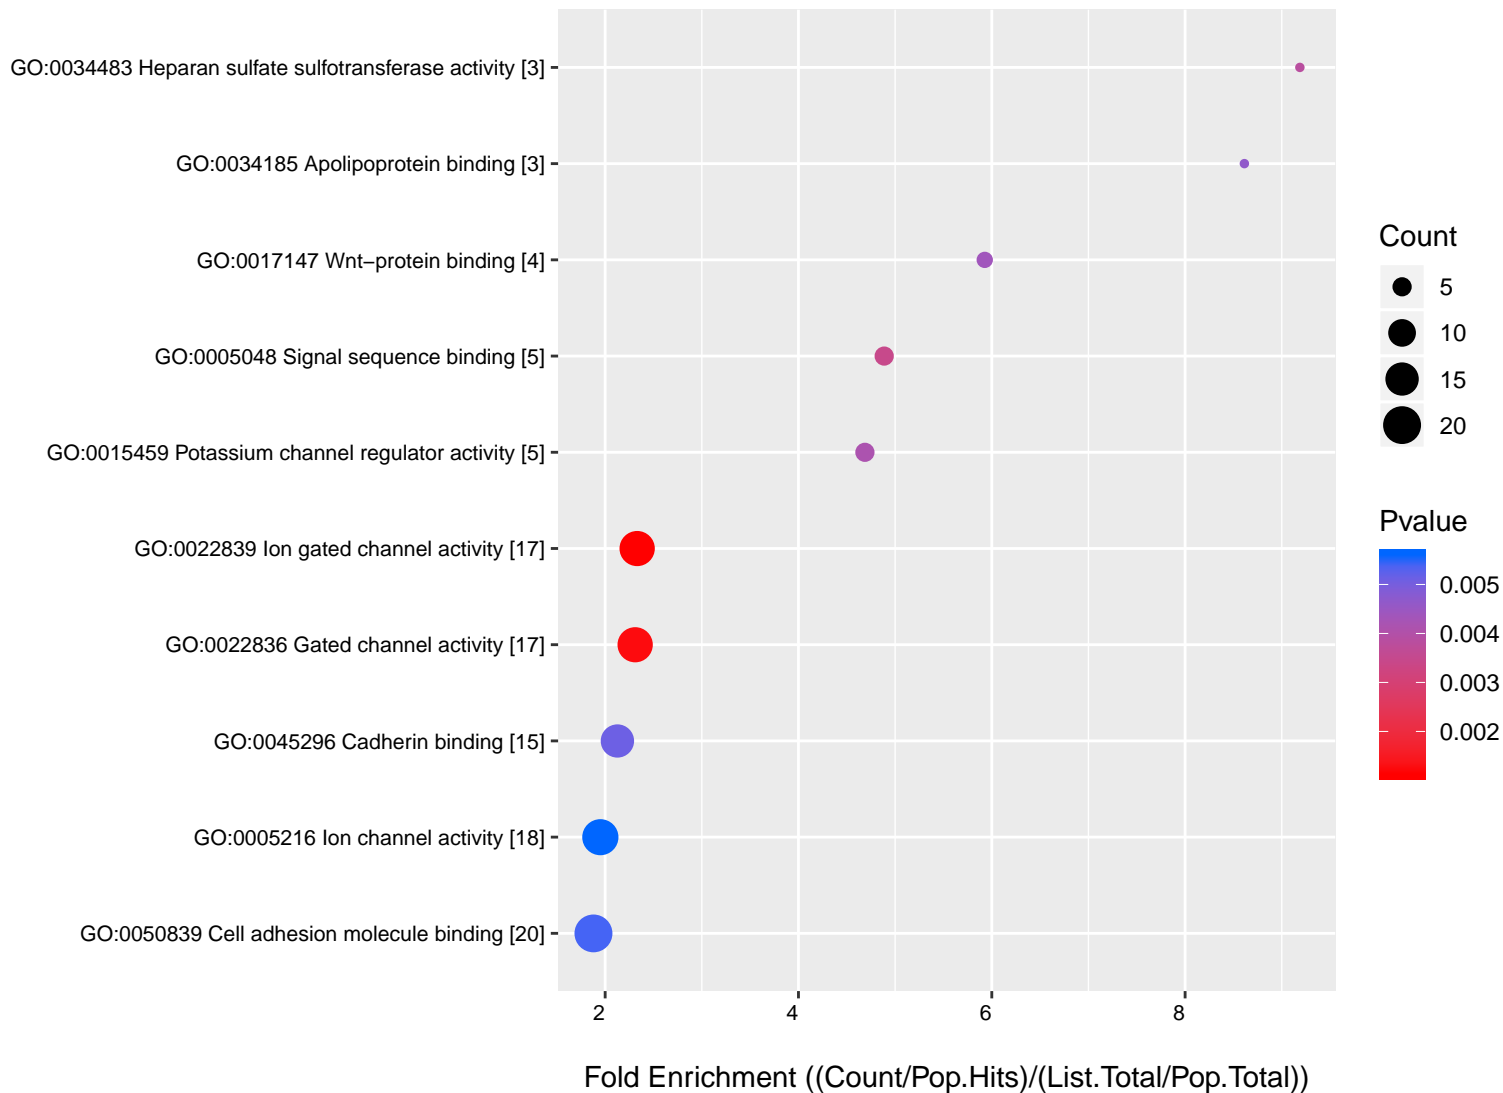

Supplement: s1 [file s1]

# Sig GO terms of DE gene-BP

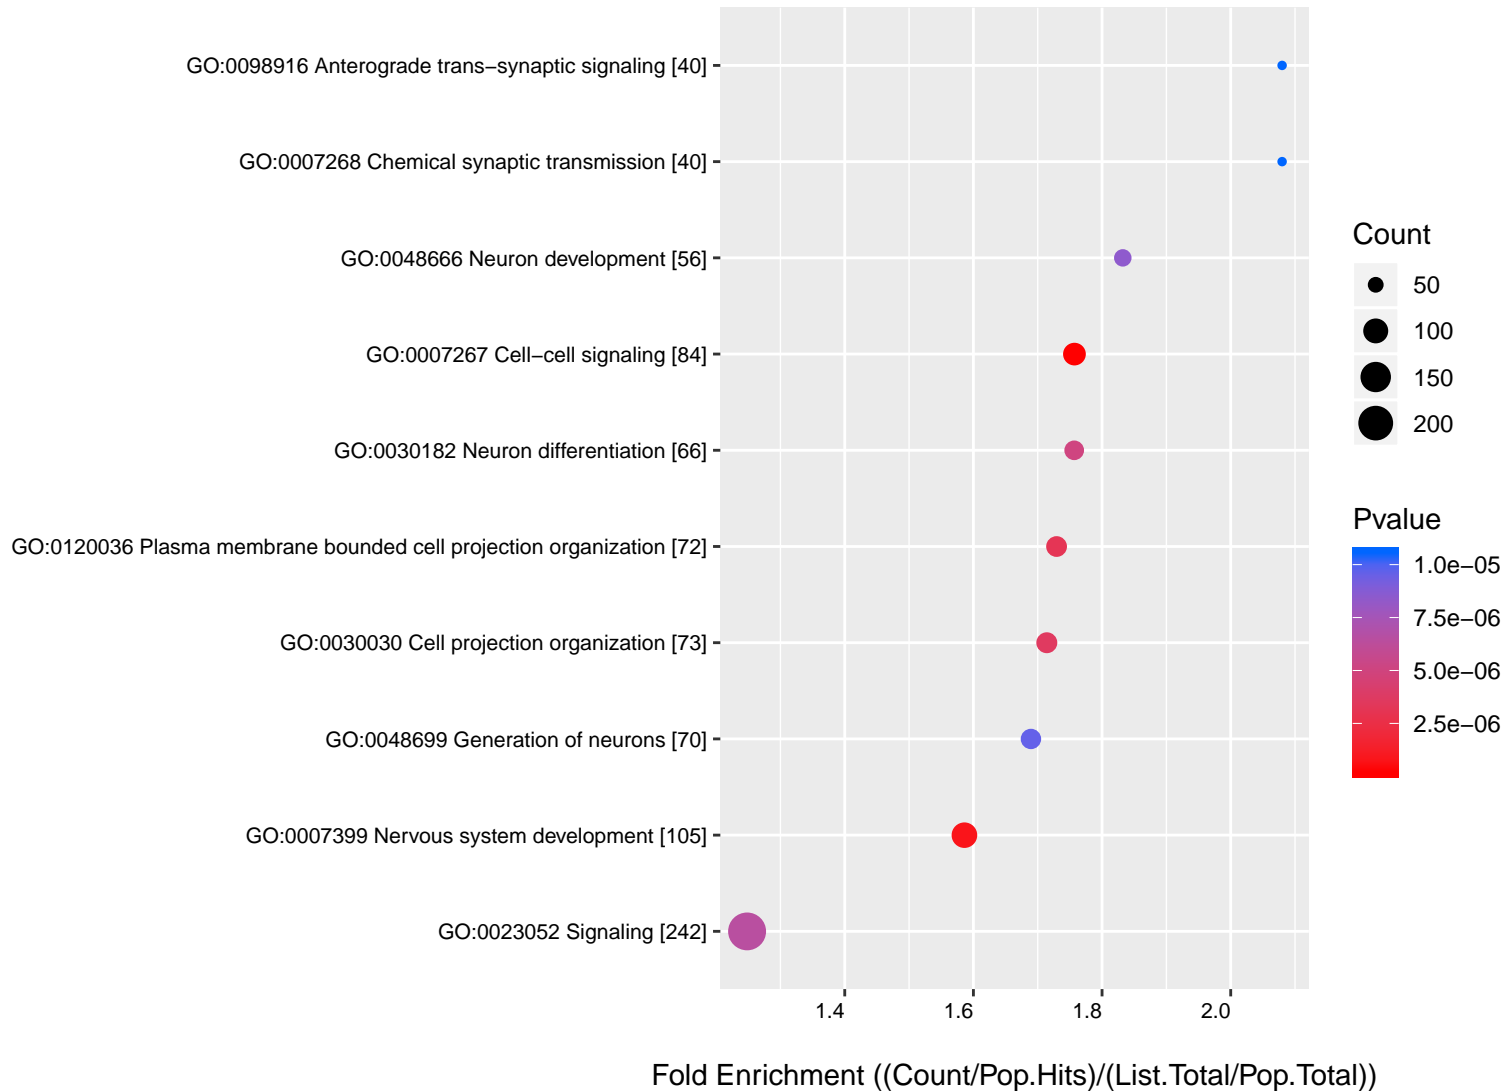

Supplement: s1 [file s1]

# Sig GO terms of DE gene-BP

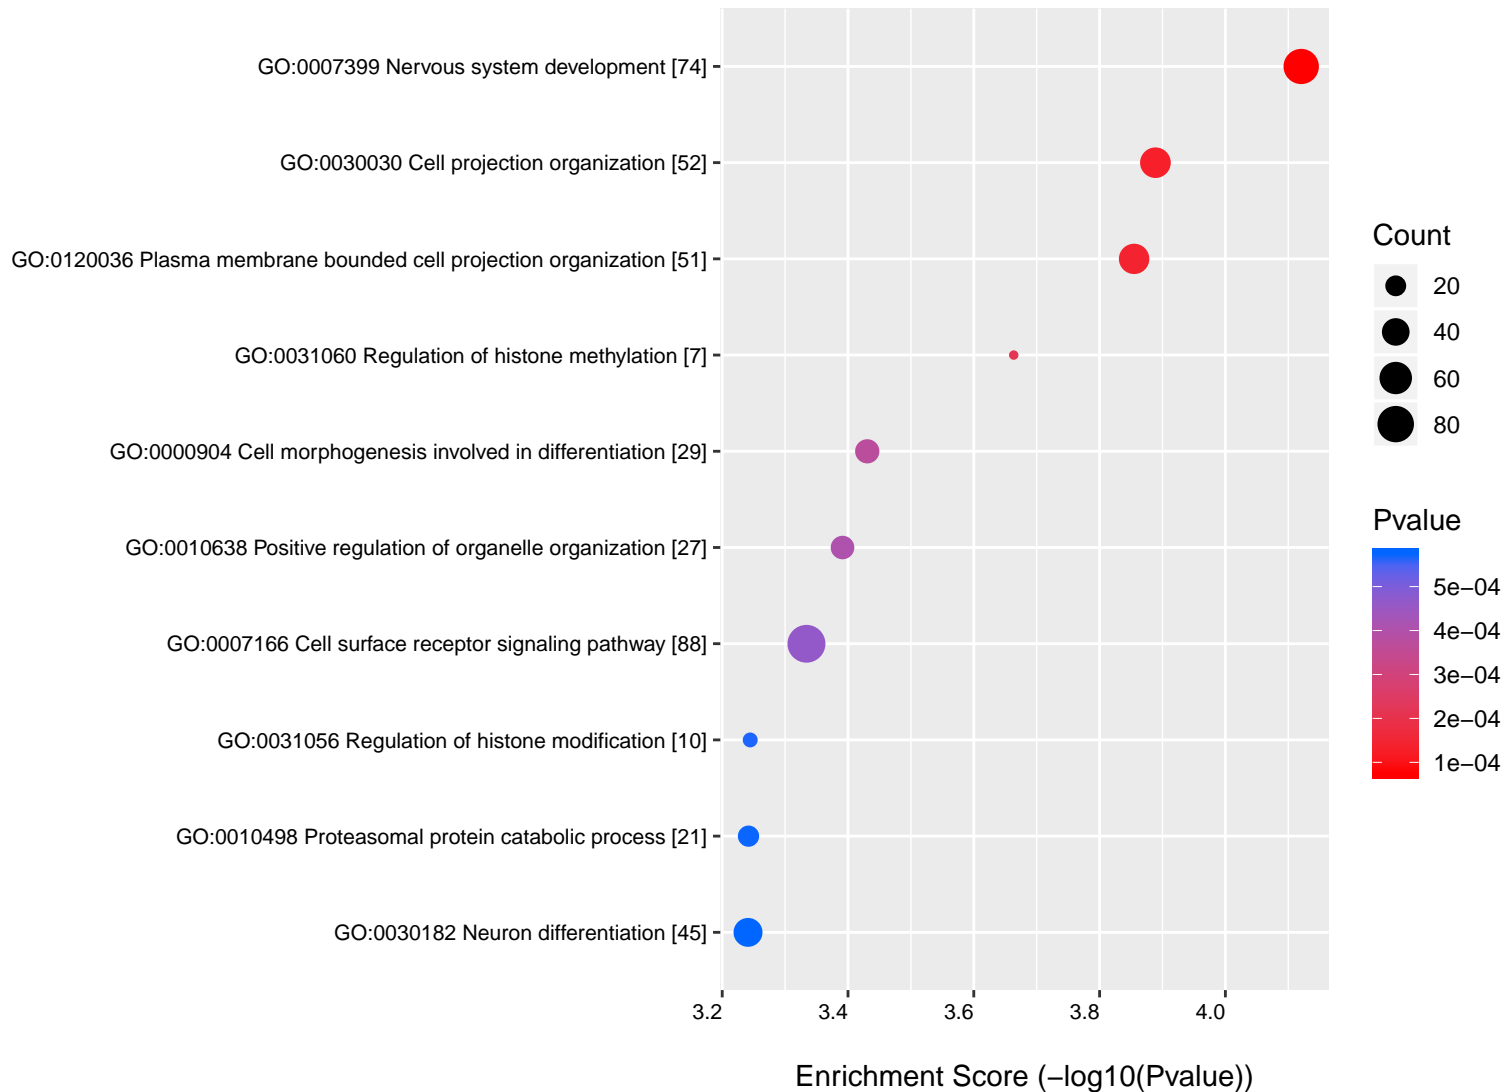

Supplement: s1 [file s1]

# Sig GO terms of DE gene-BP

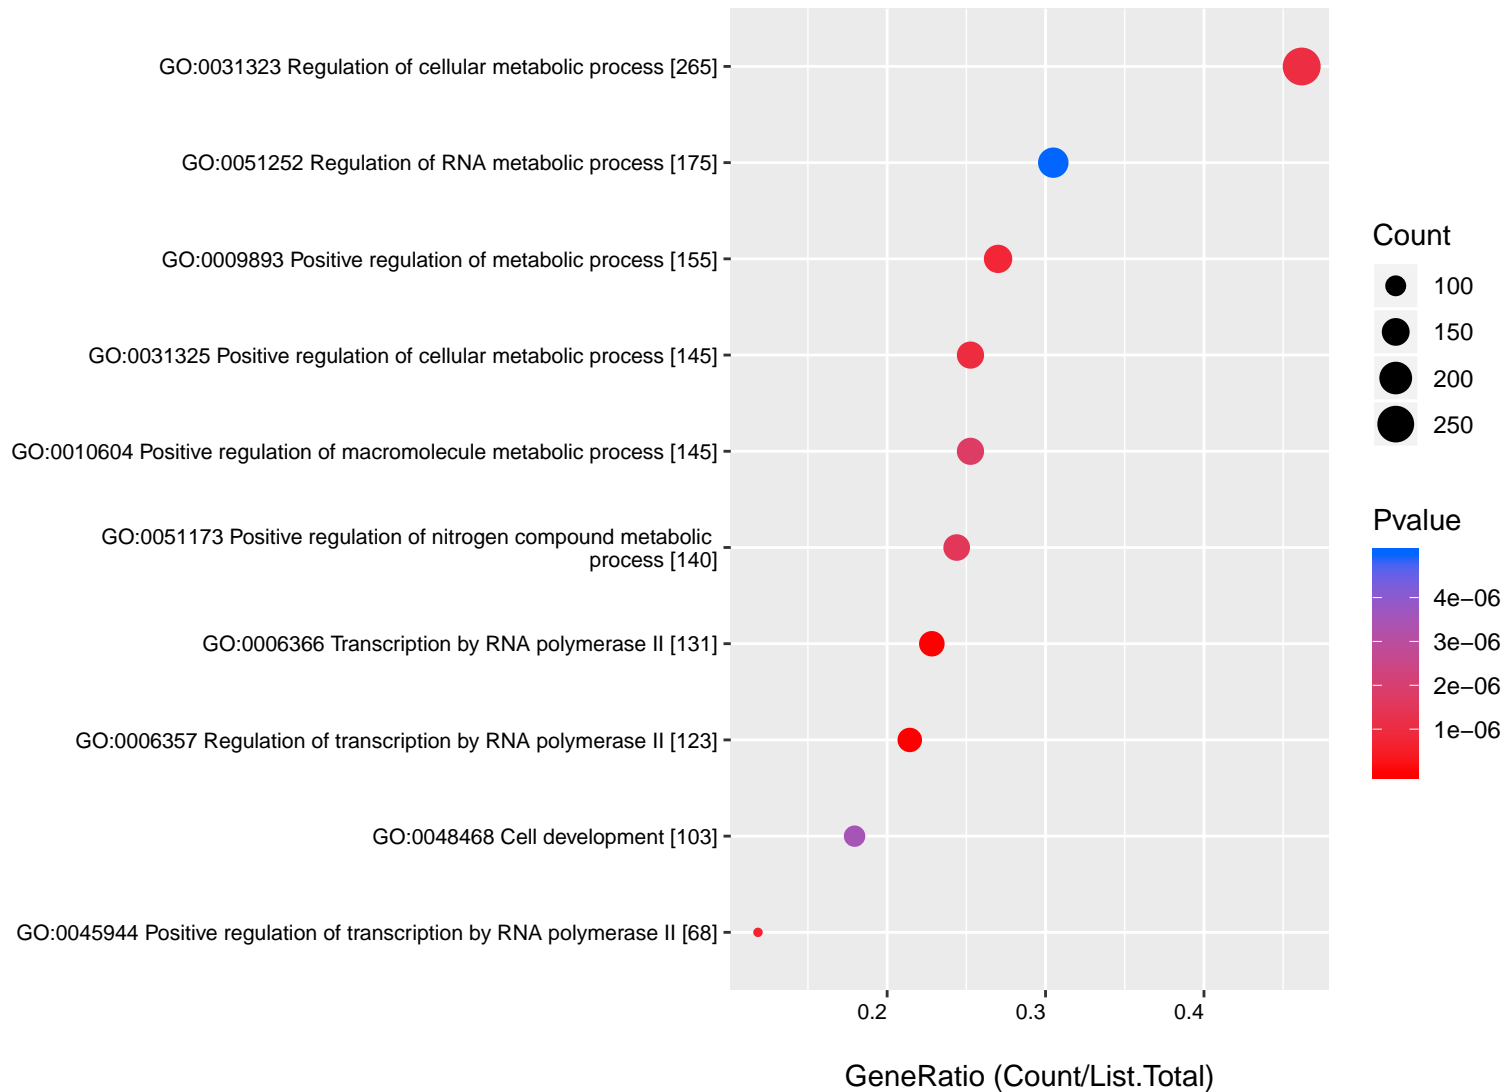

Supplement: s1 [file s1]

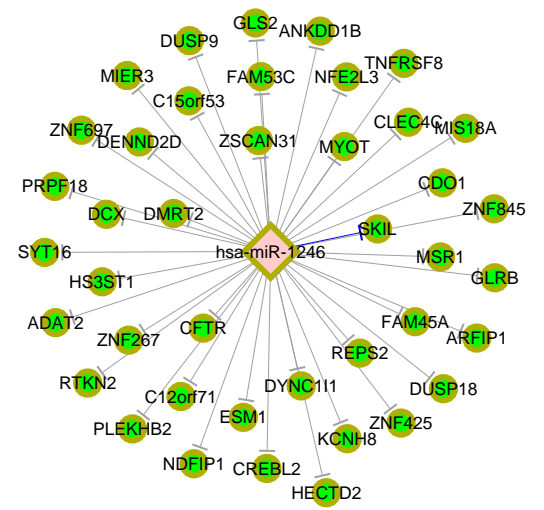

Supplement: s1 [file s1]

# GO Molecular Function Classification

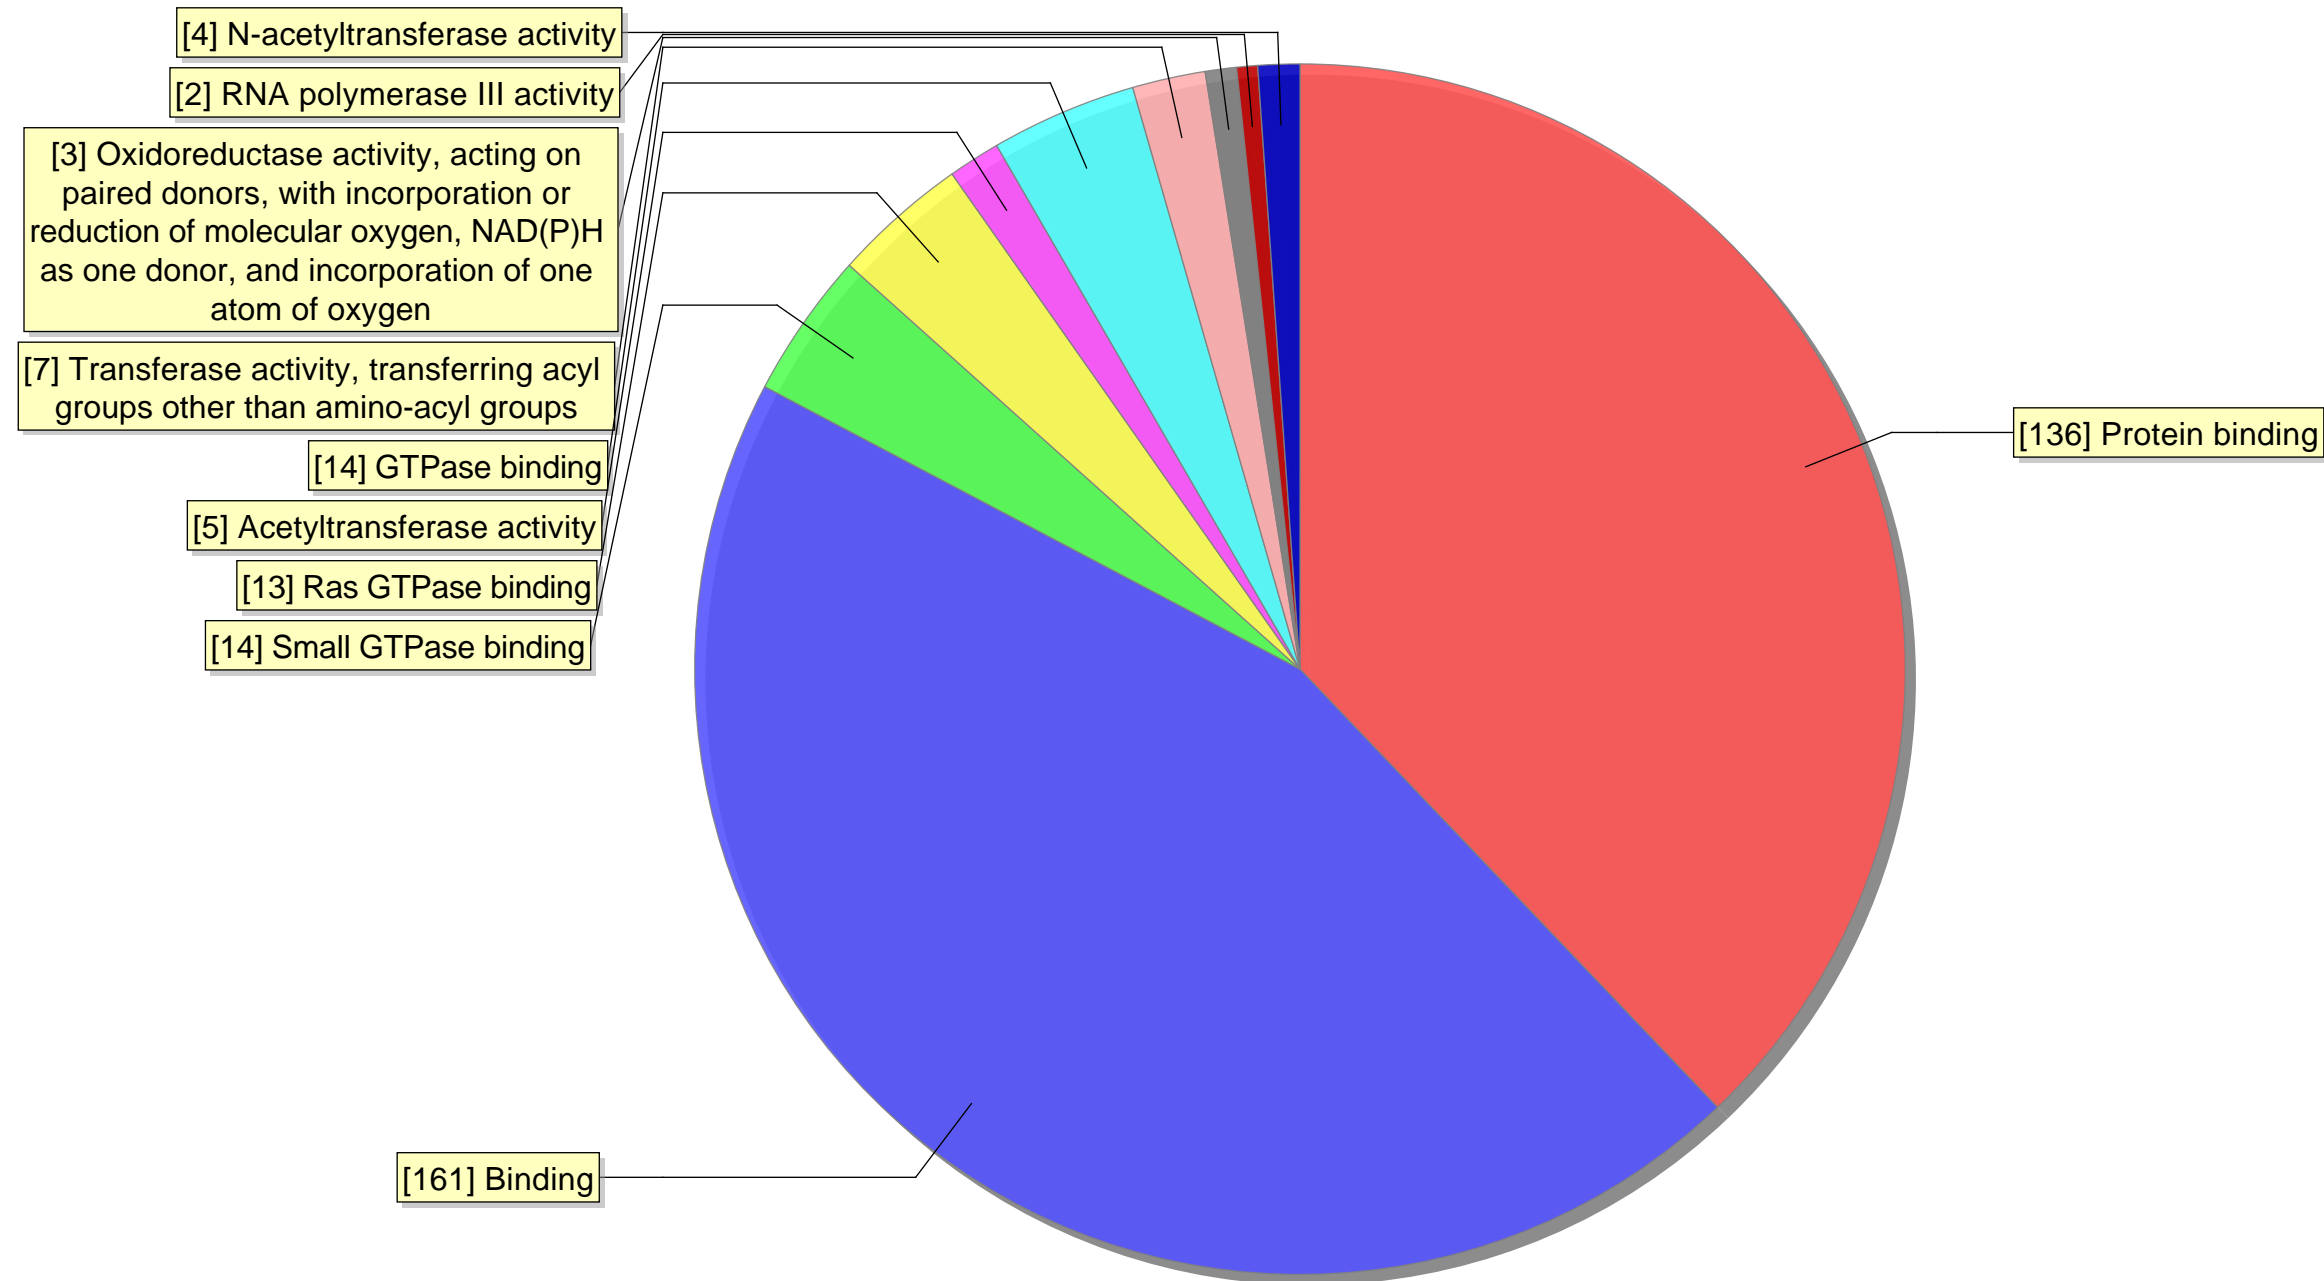

Supplement: s1 [file s1]

## Sig GO terms of DE gene-CC

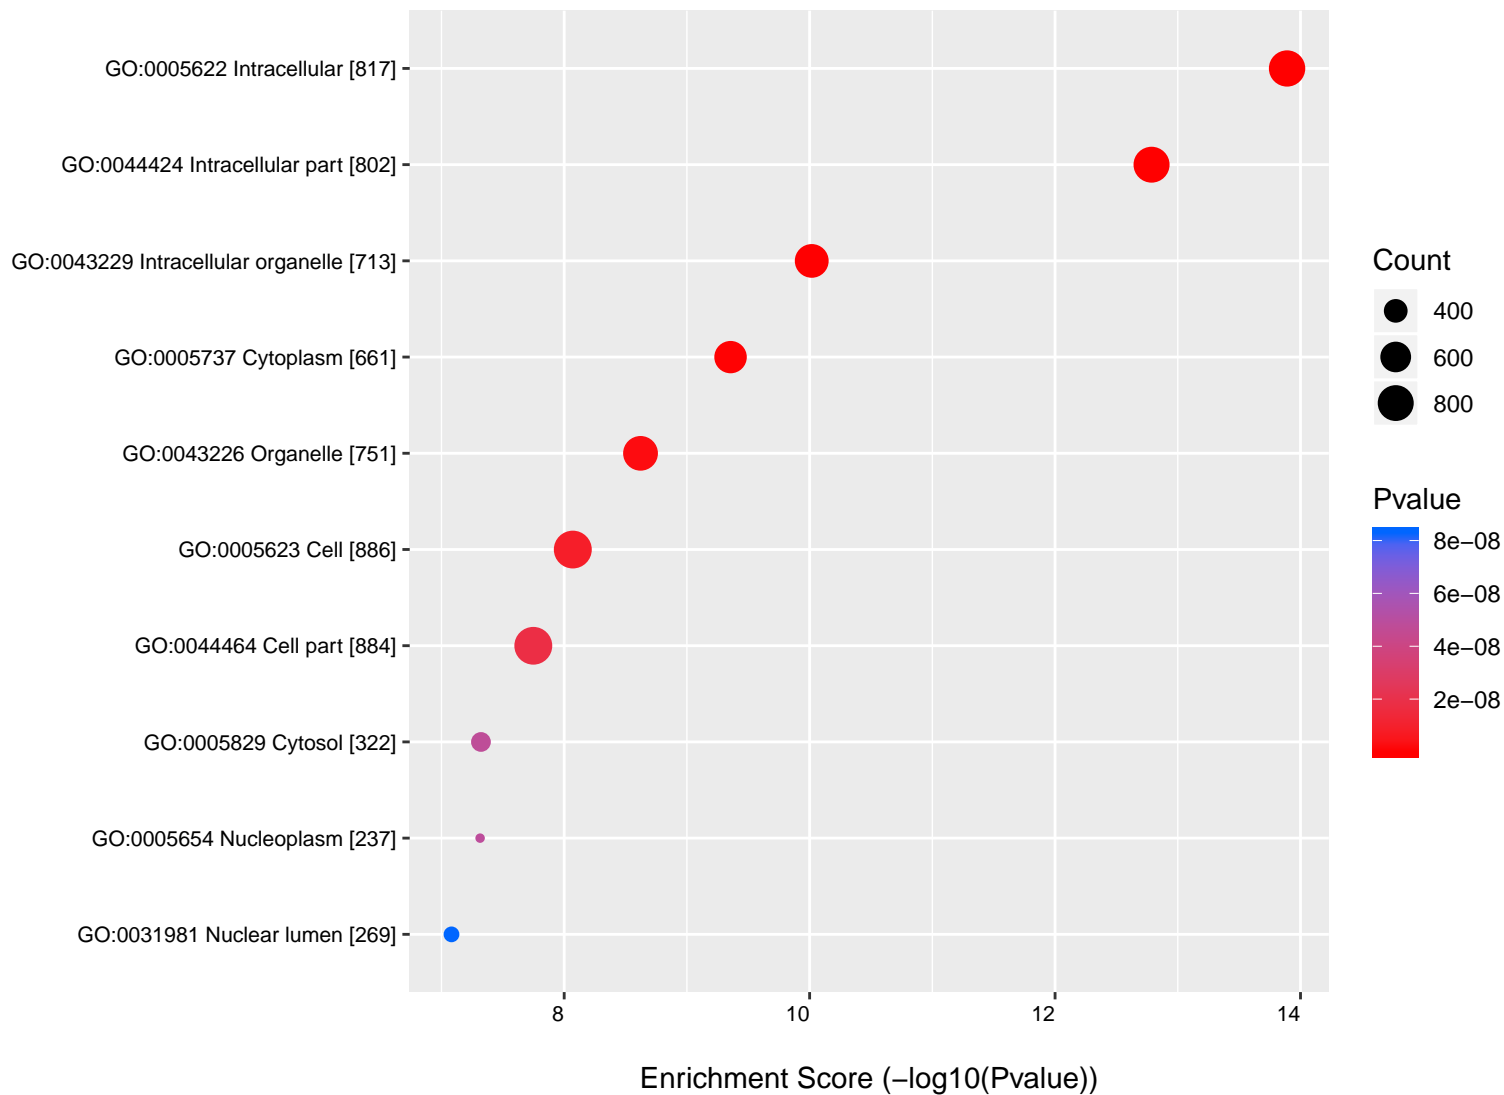

Supplement: s1 [file s1]

# Sig GO terms of DE gene-MF

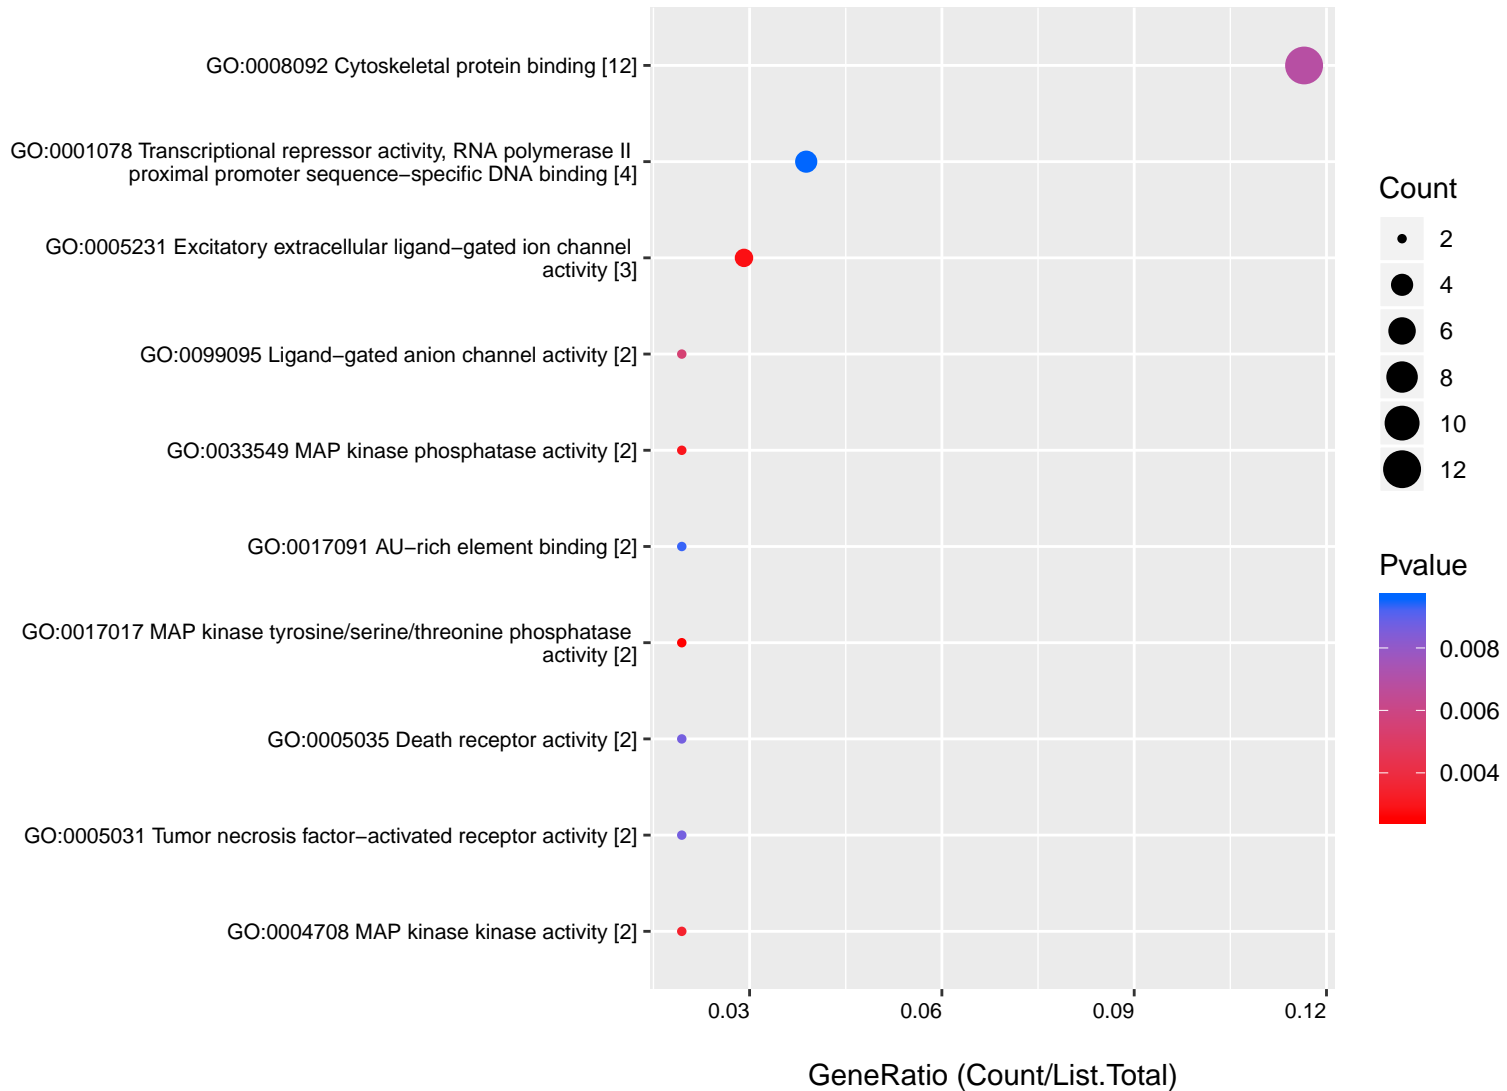

Supplement: s1 [file s1]

# Sig pathway of DE gene

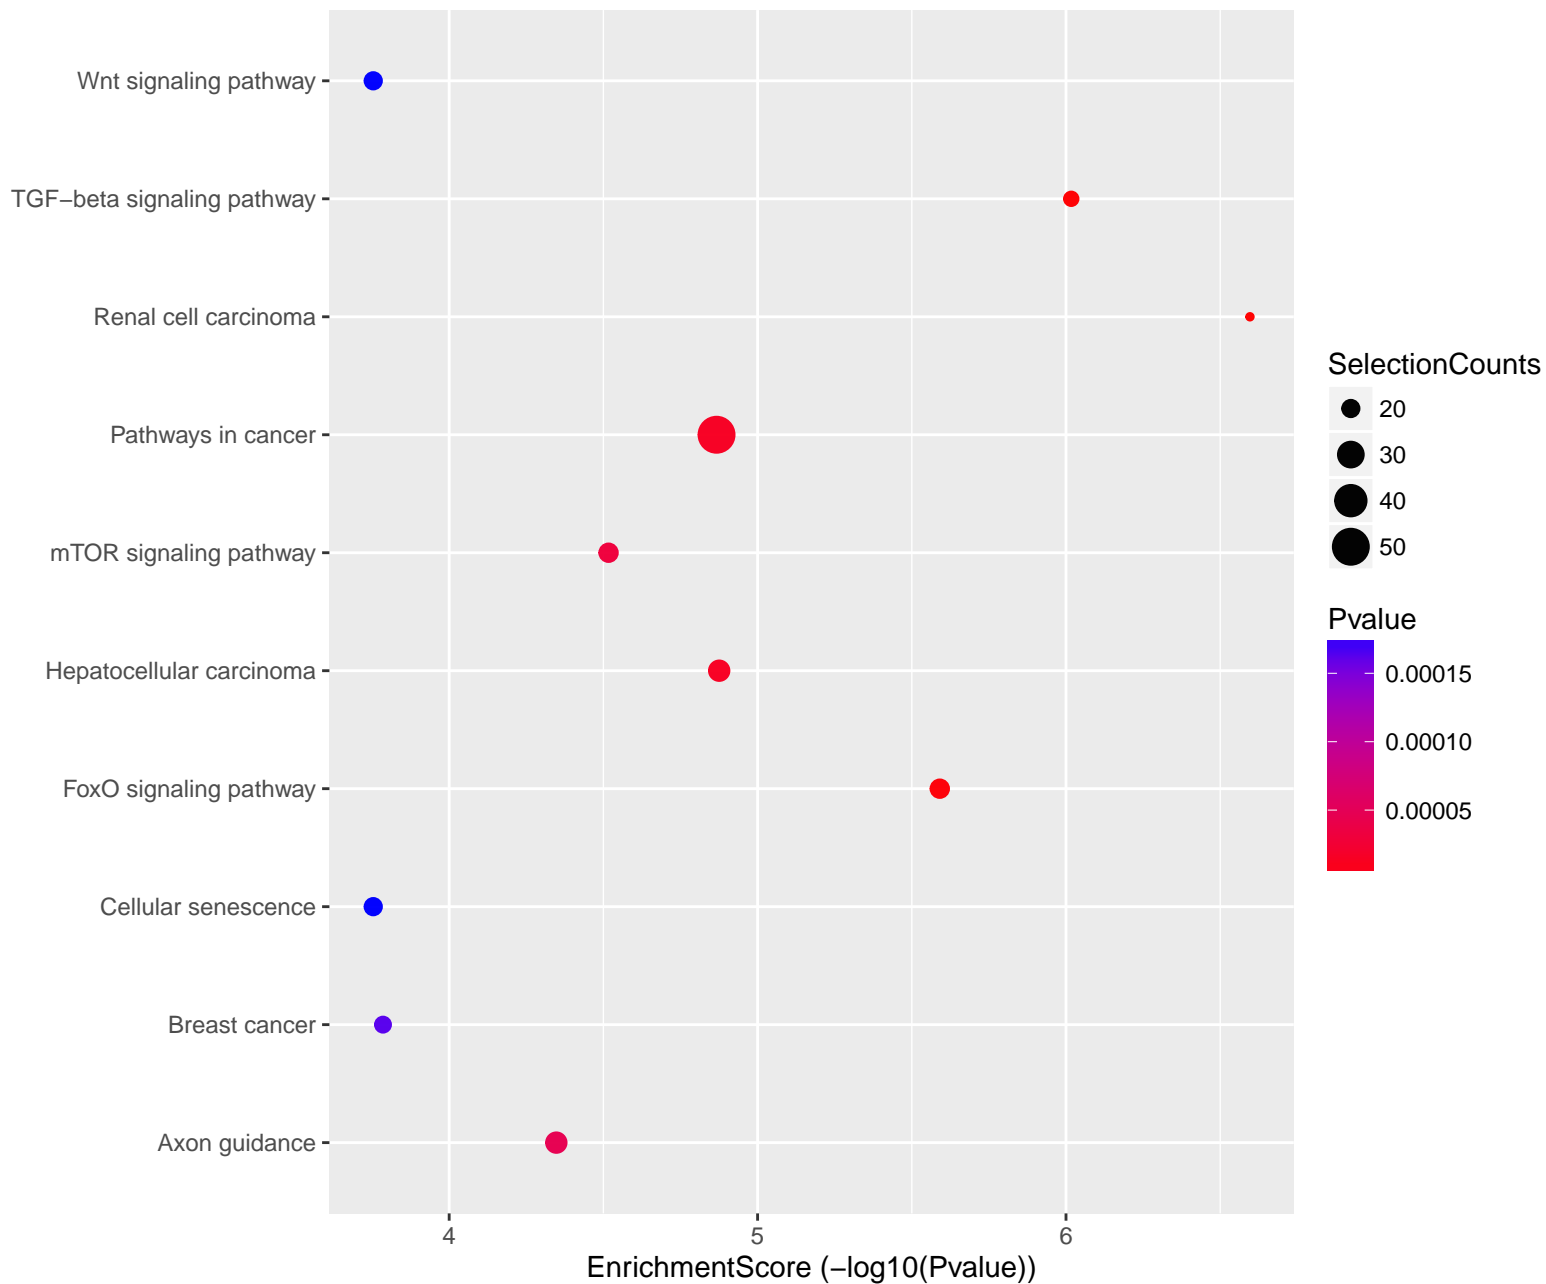

Supplement: s1 [file s1]

# GO Biological Process Classification

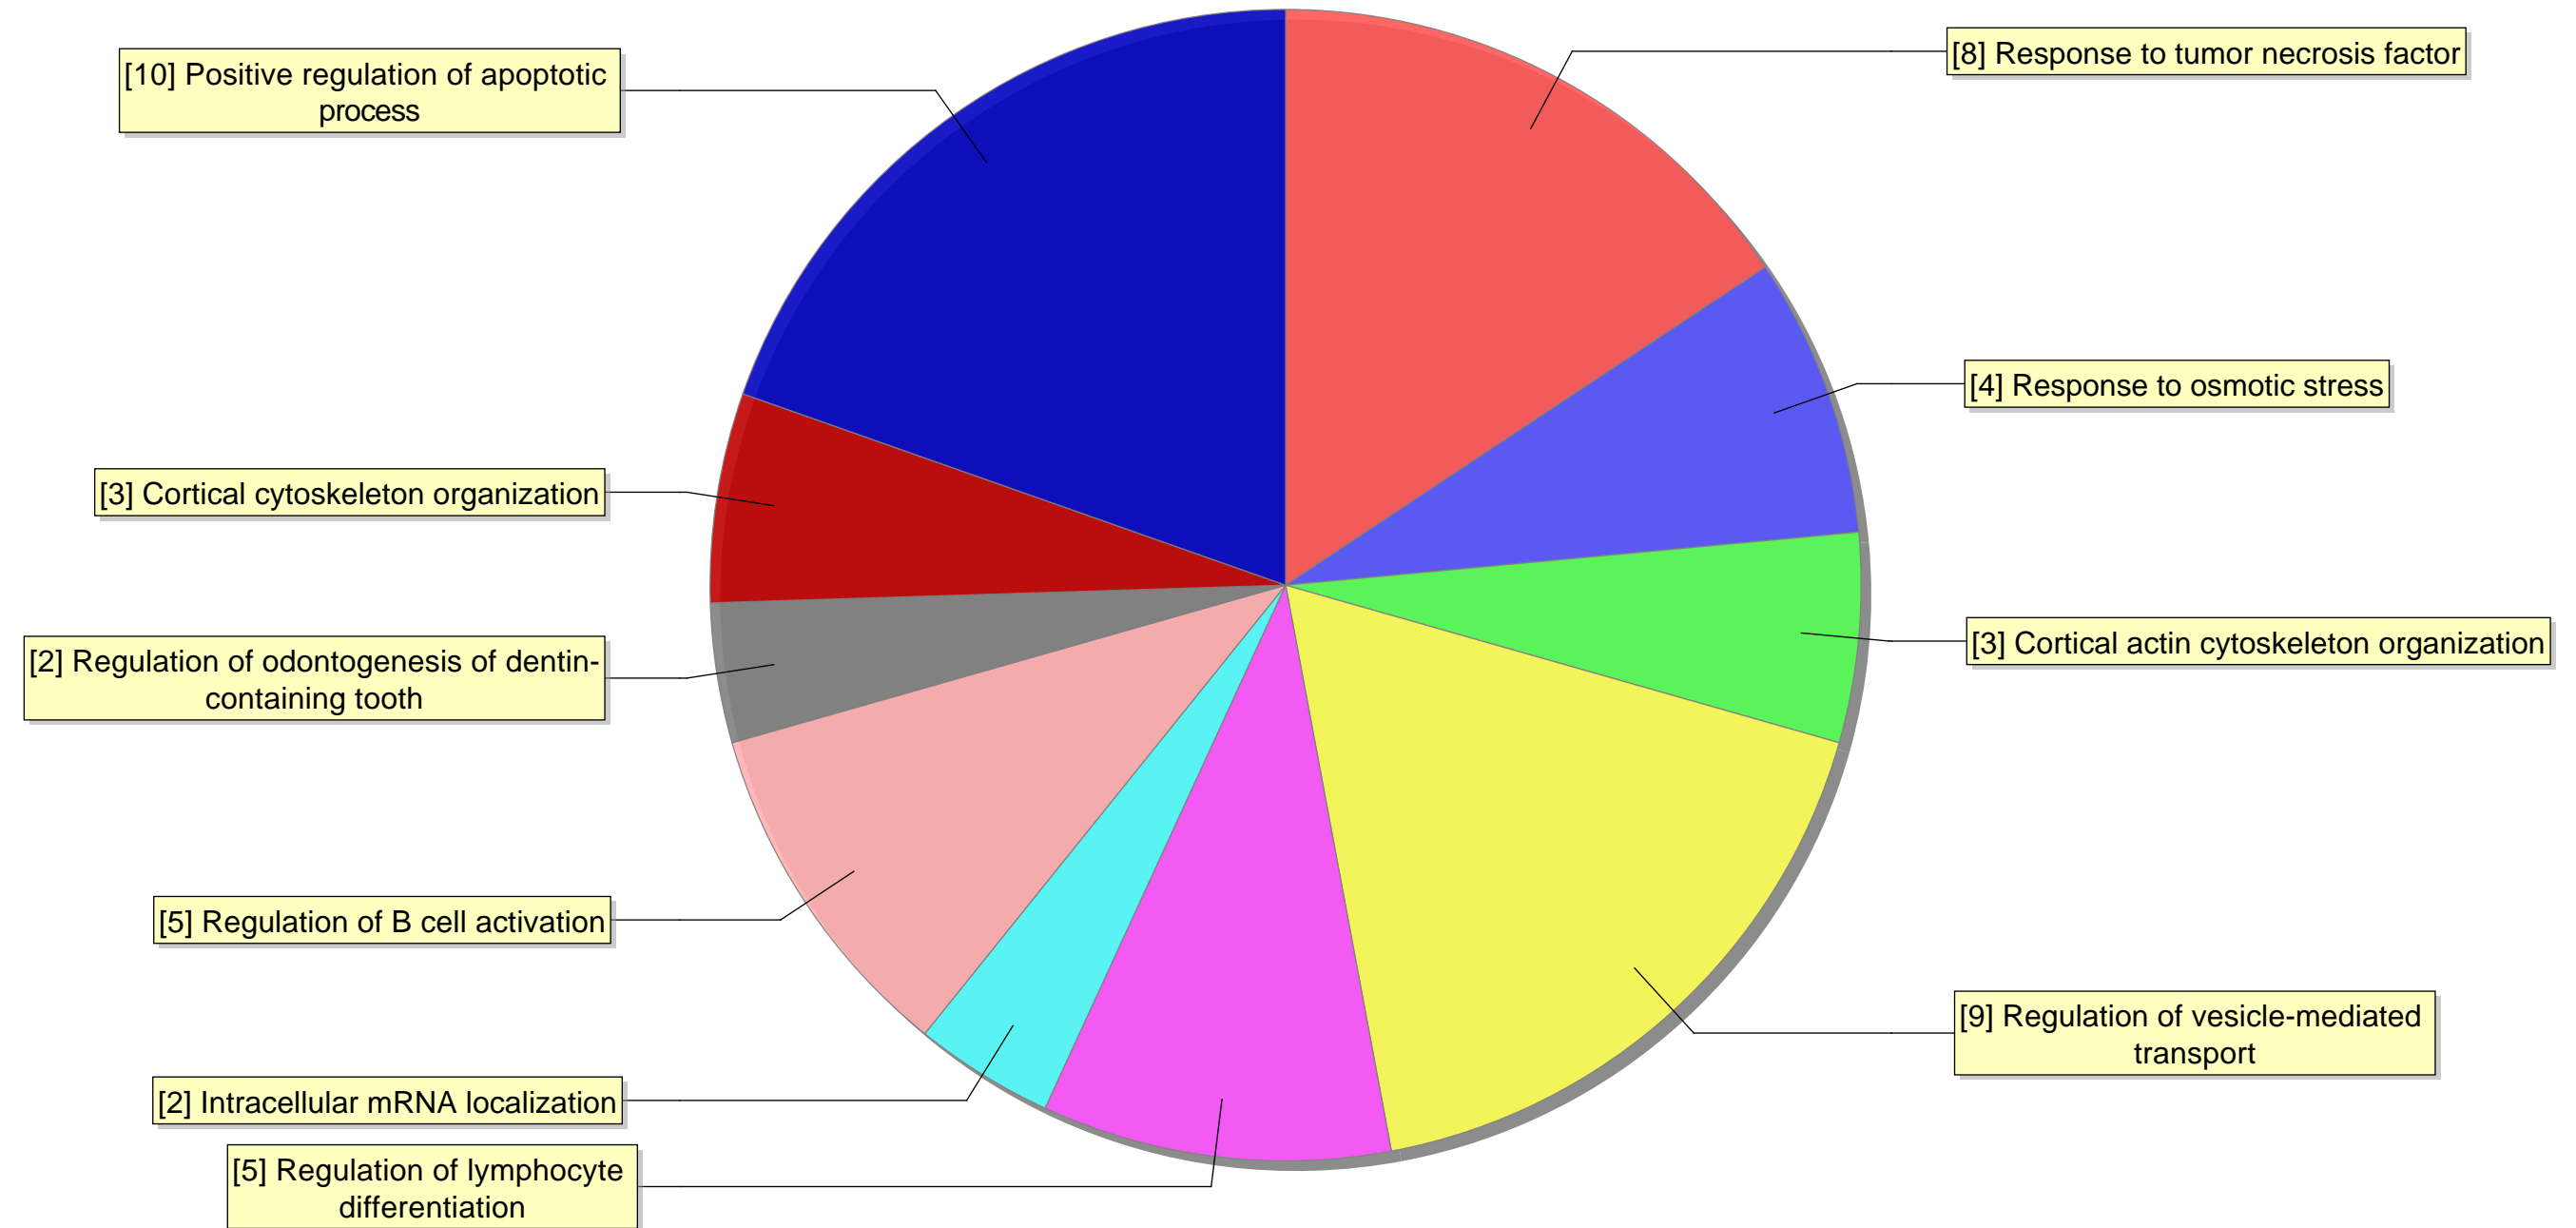

Supplement: s1 [file s1]

## Sig GO terms of DE gene–MF

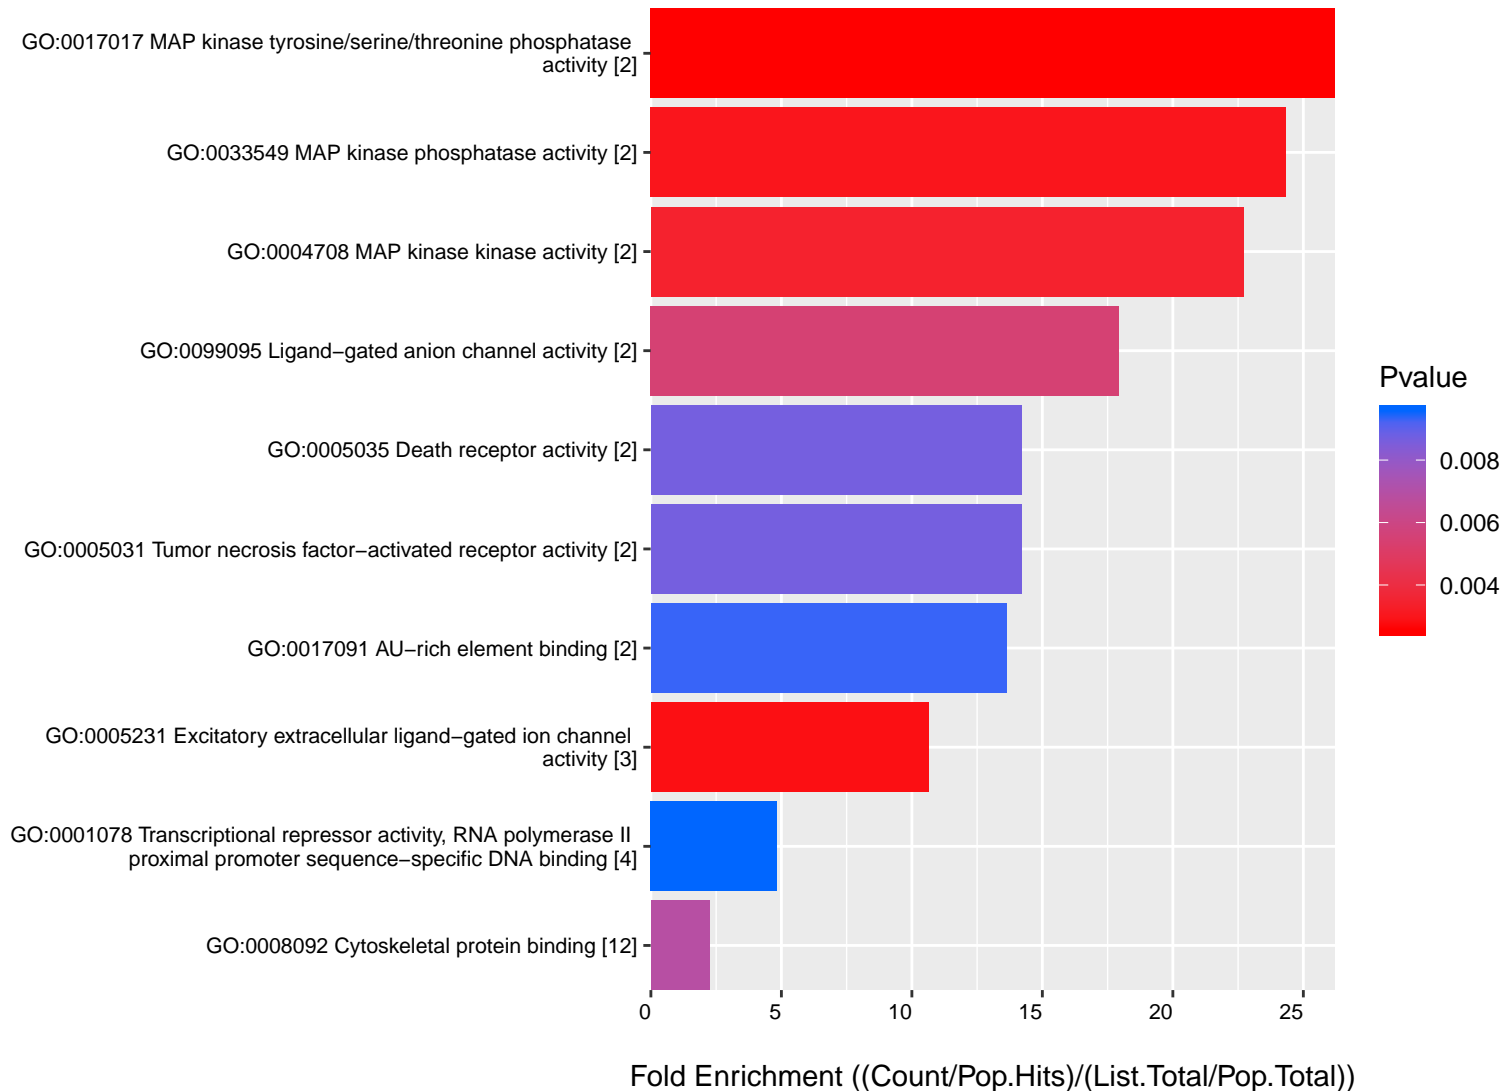

Supplement: s1 [file s1]

# Sig GO terms of DE gene-CC

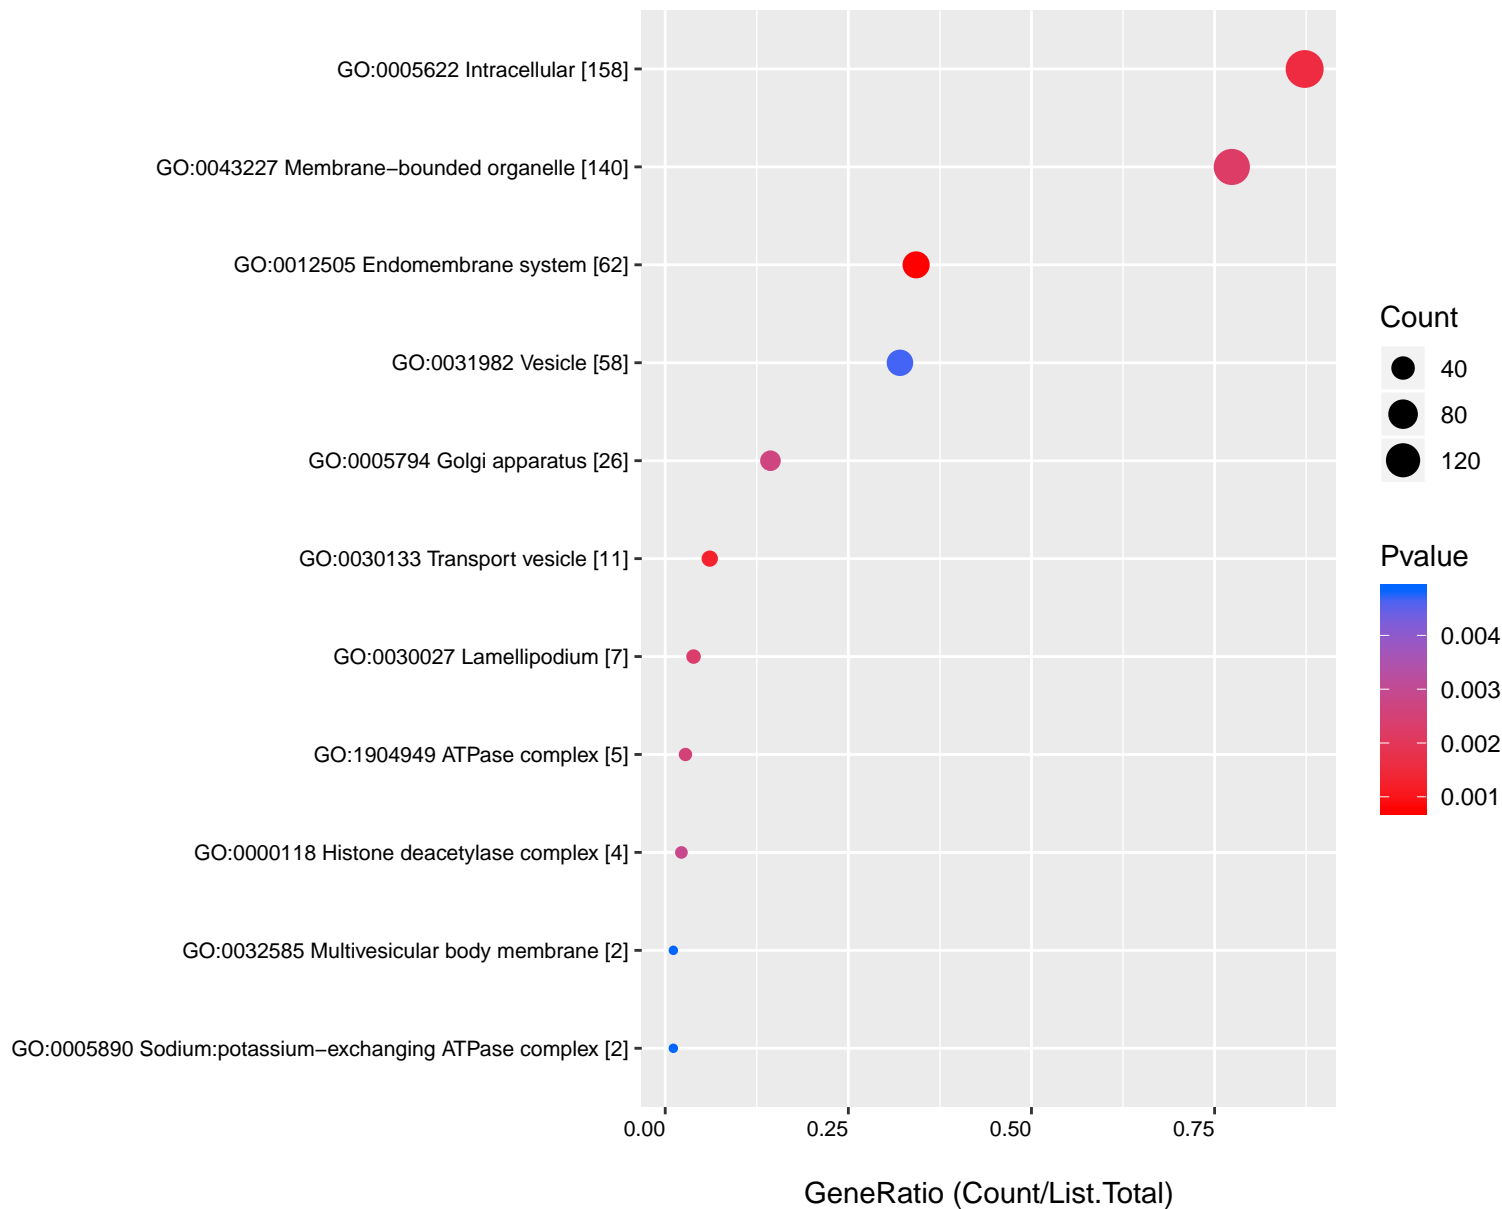

Supplement: s1 [file s1]

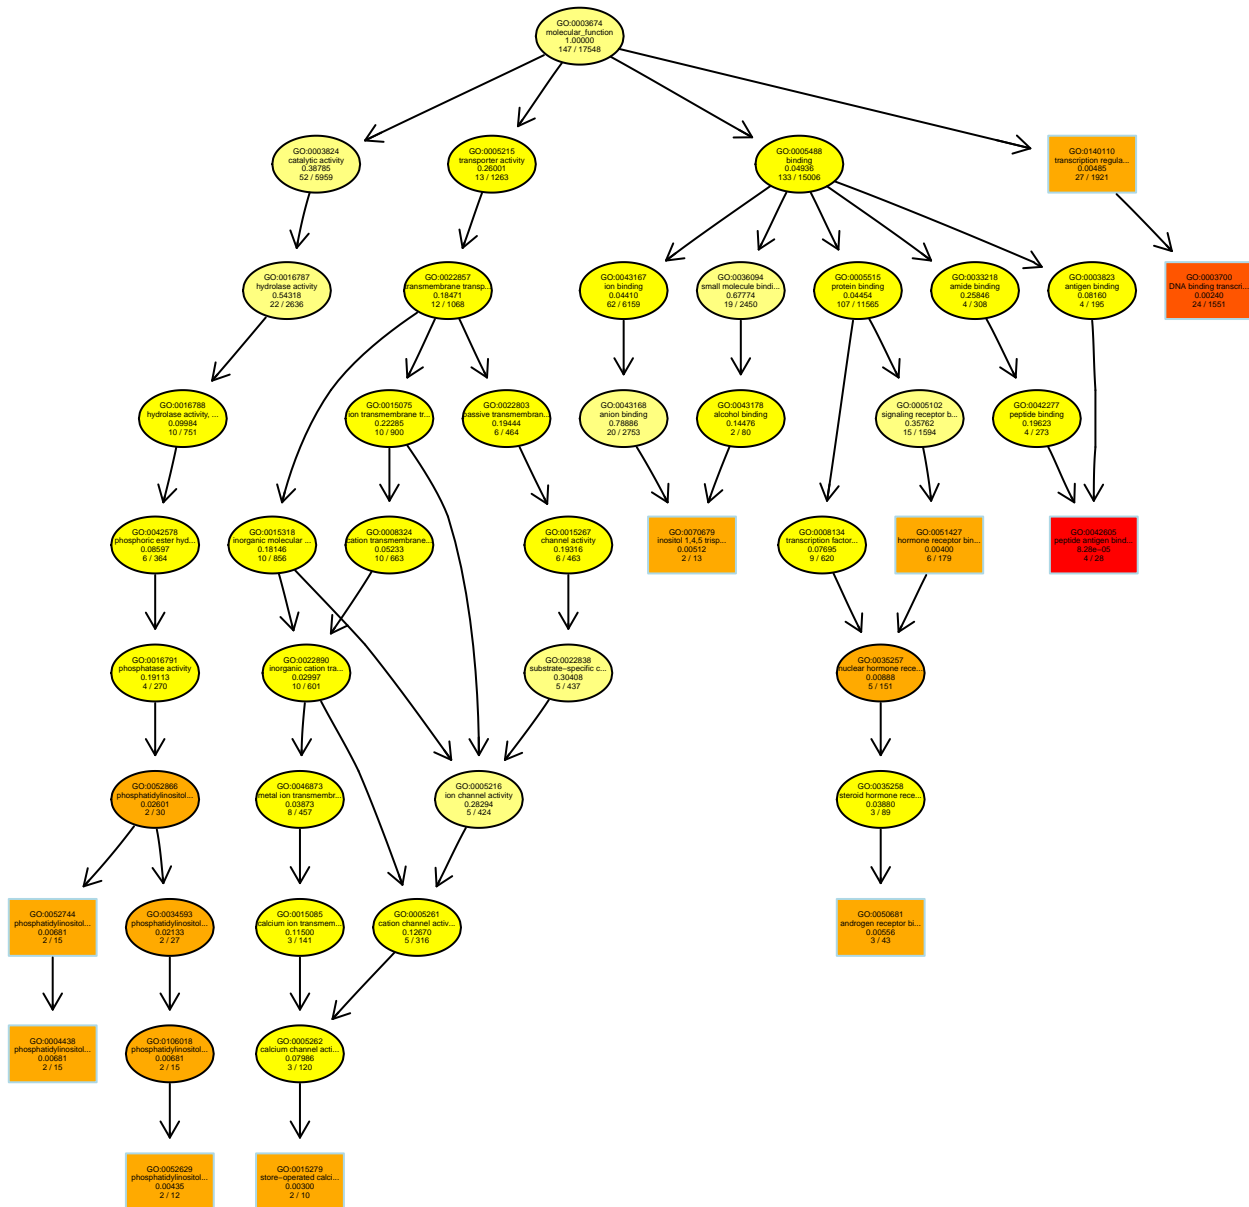

Supplement: s1 [file s1]

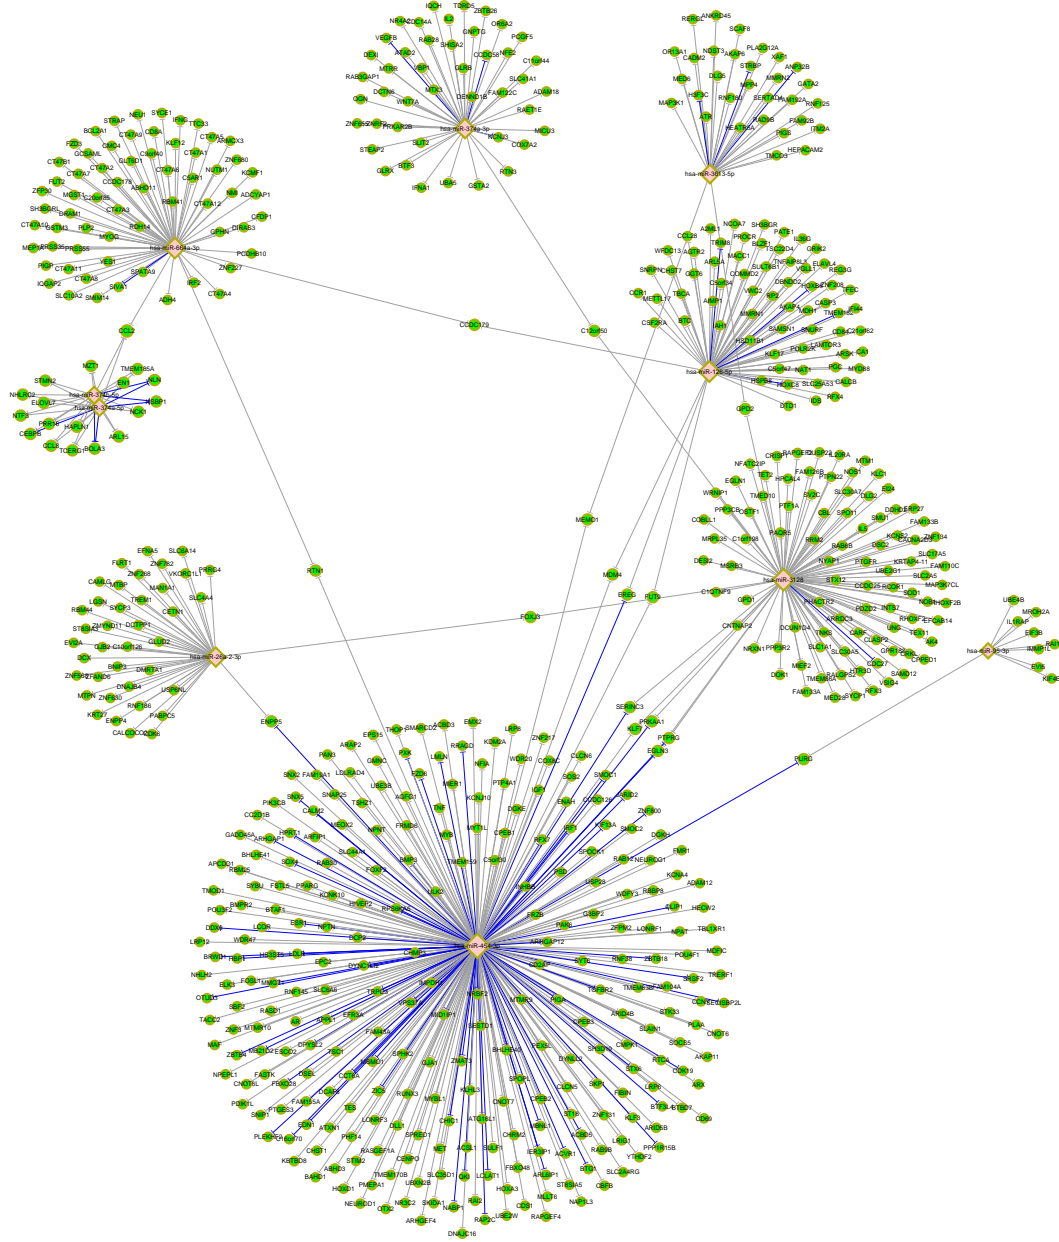

Supplement: s1 [file s1]

## Sig GO terms of DE gene-BP

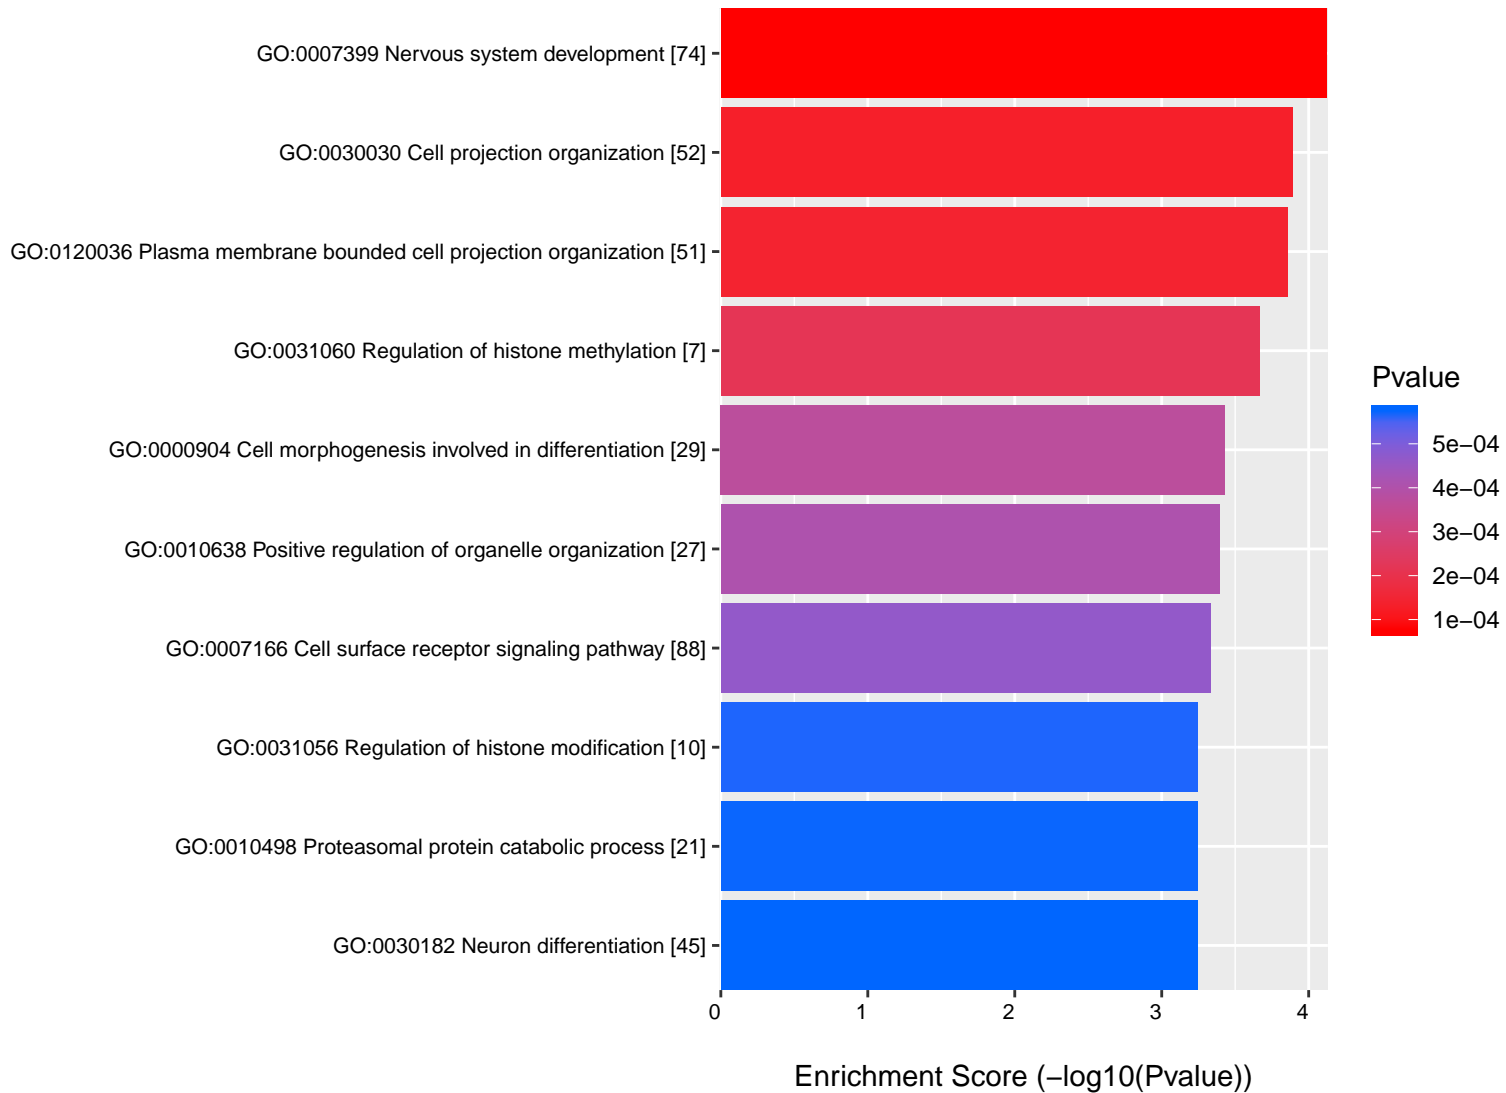

Supplement: s1 [file s1]

# Sig pathway of DE gene

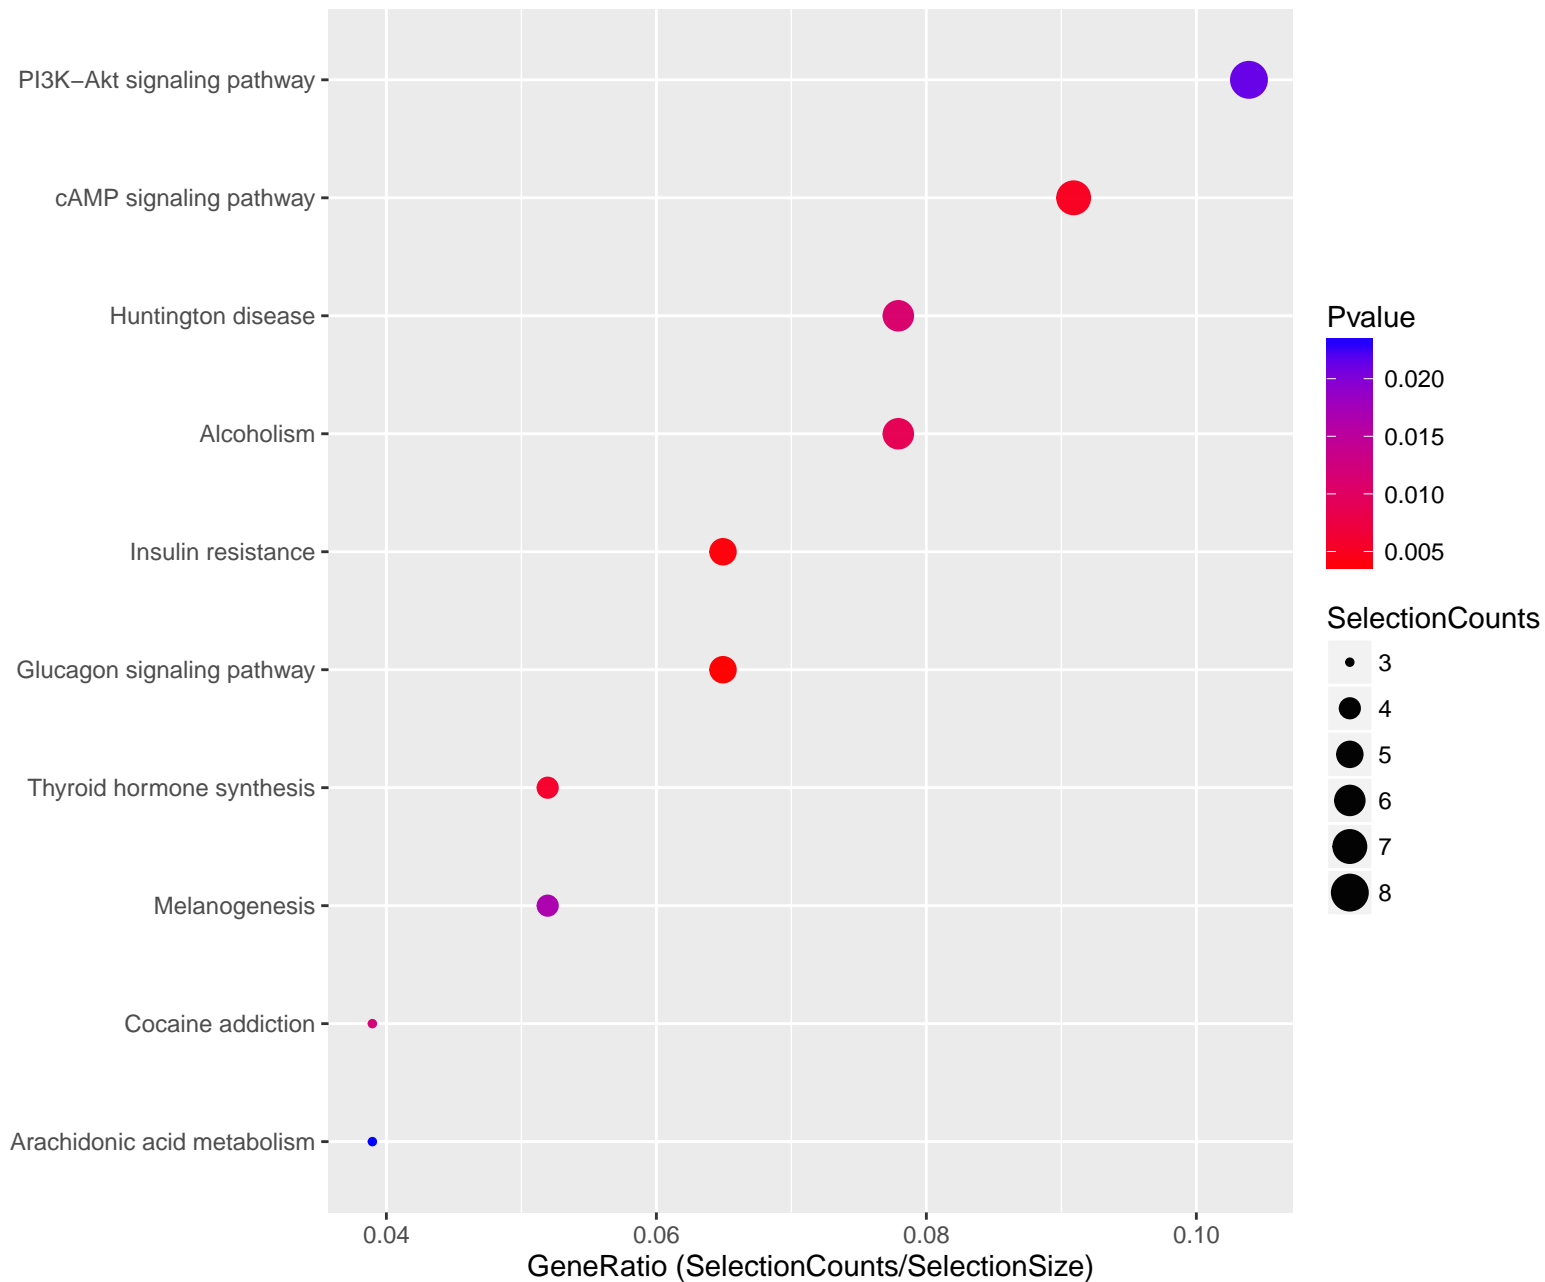

Supplement: s1 [file s1]

## Sig GO terms of DE gene-CC

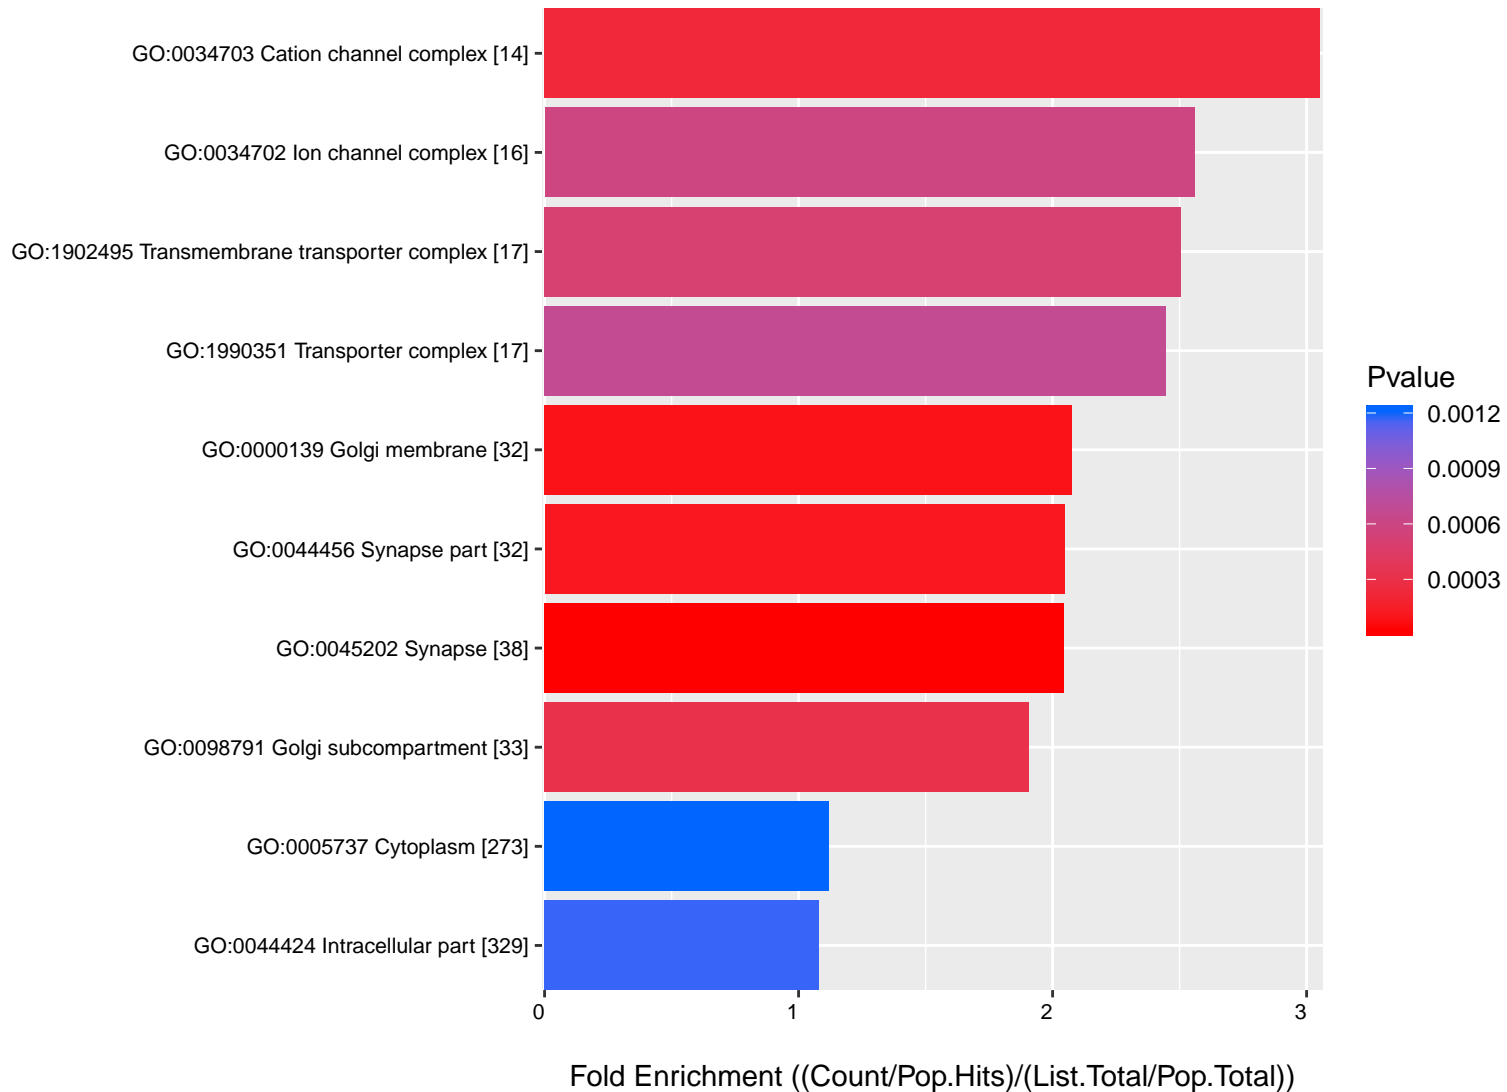

Supplement: s1 [file s1]

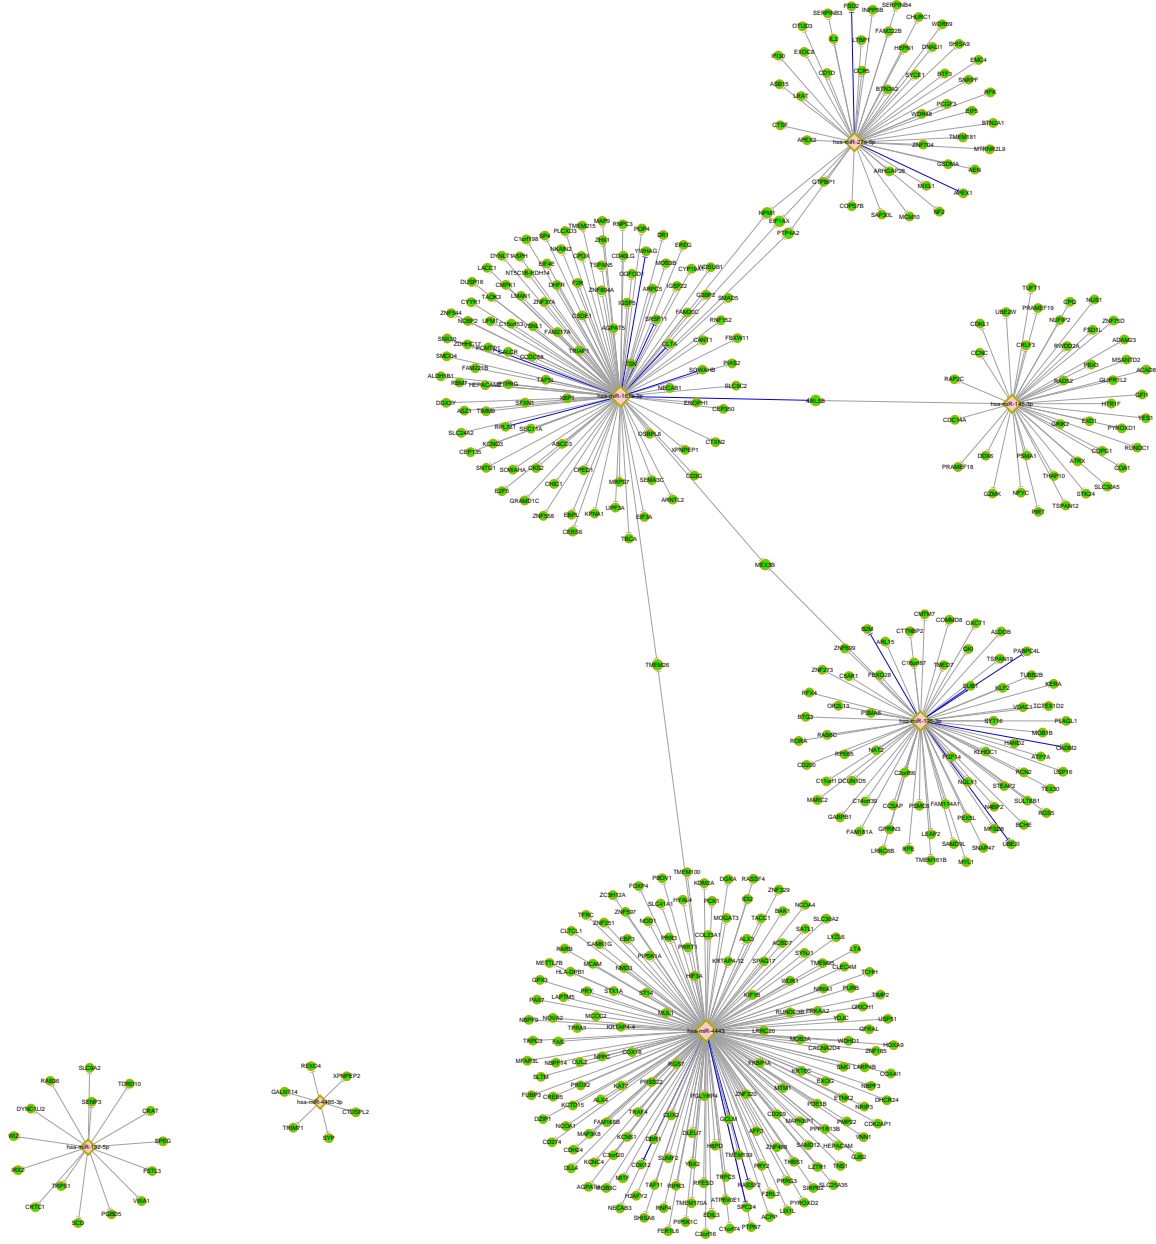

Supplement: s1 [file s1]

## Sig GO terms of DE gene-BP

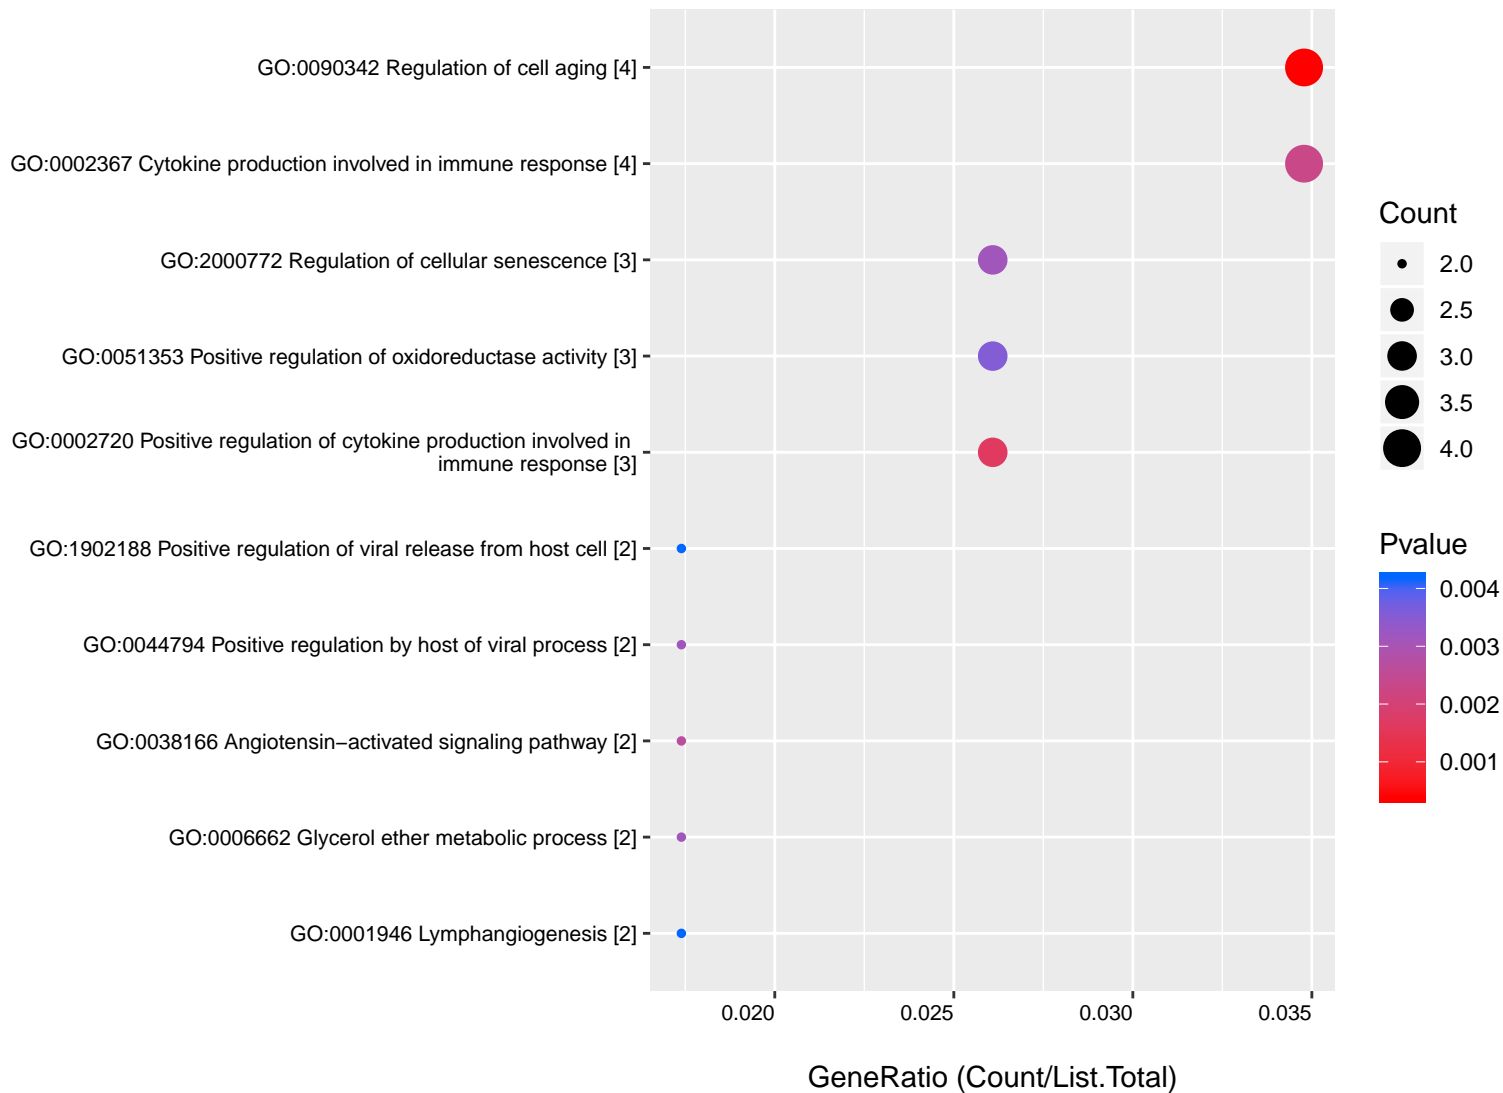

Supplement: s1 [file s1]

## Sig GO terms of DE gene-BP

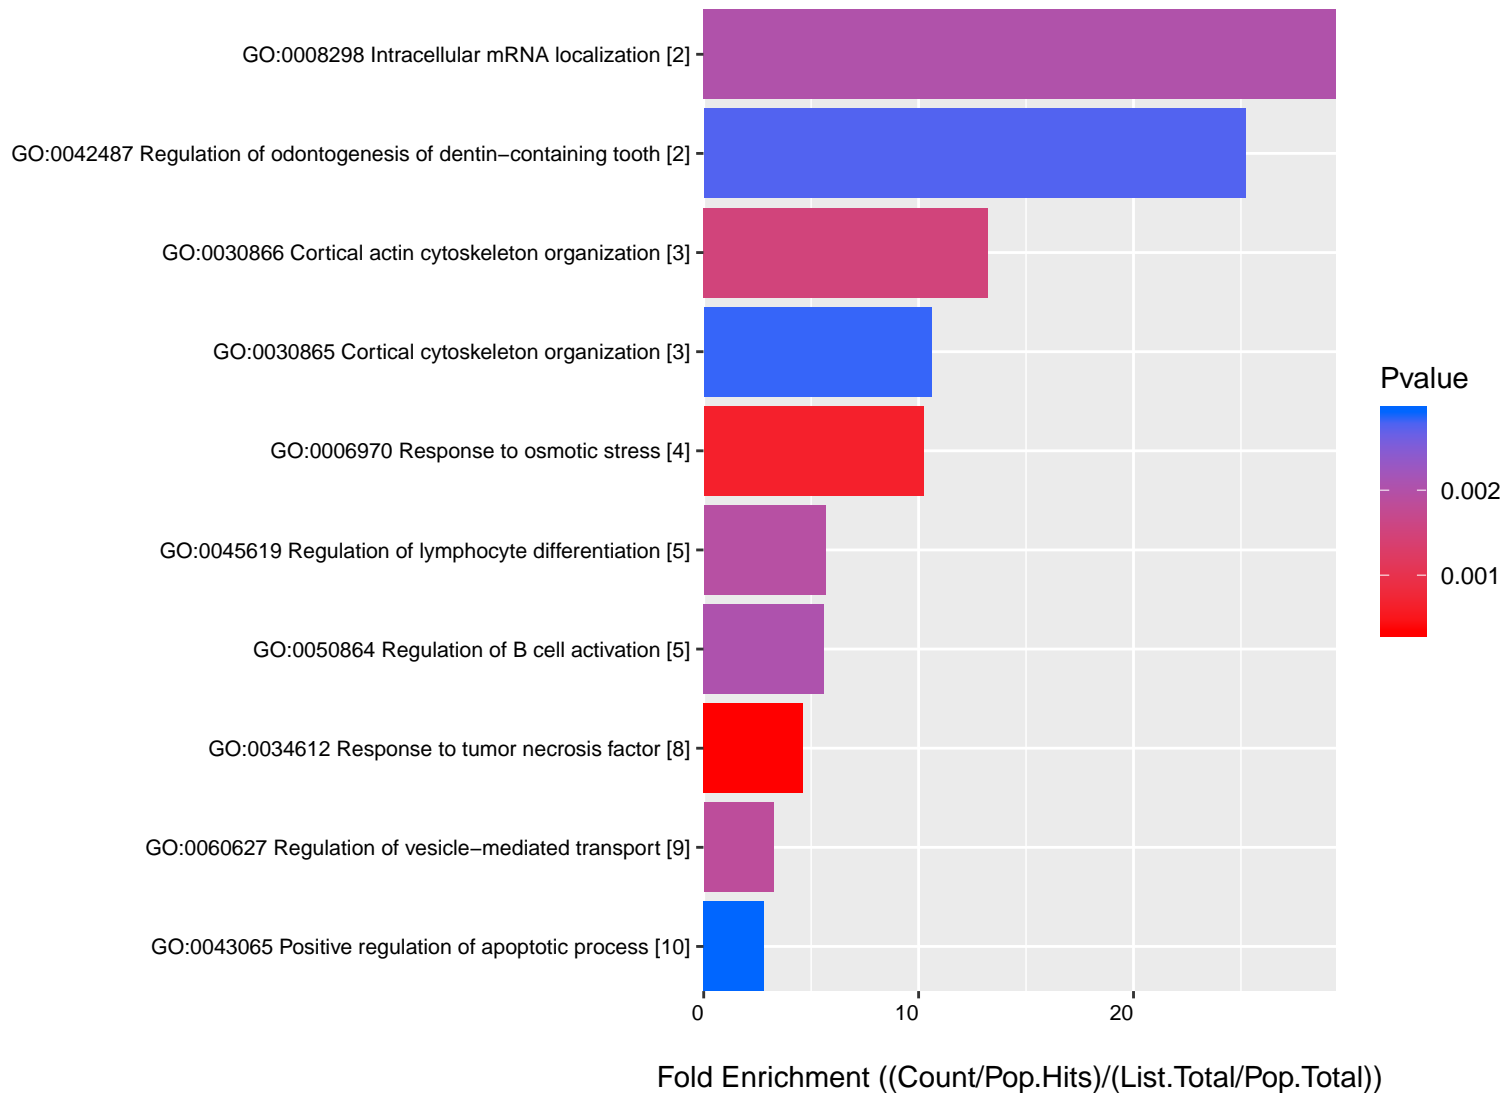

Supplement: s1 [file s1]

## Sig GO terms of DE gene-MF

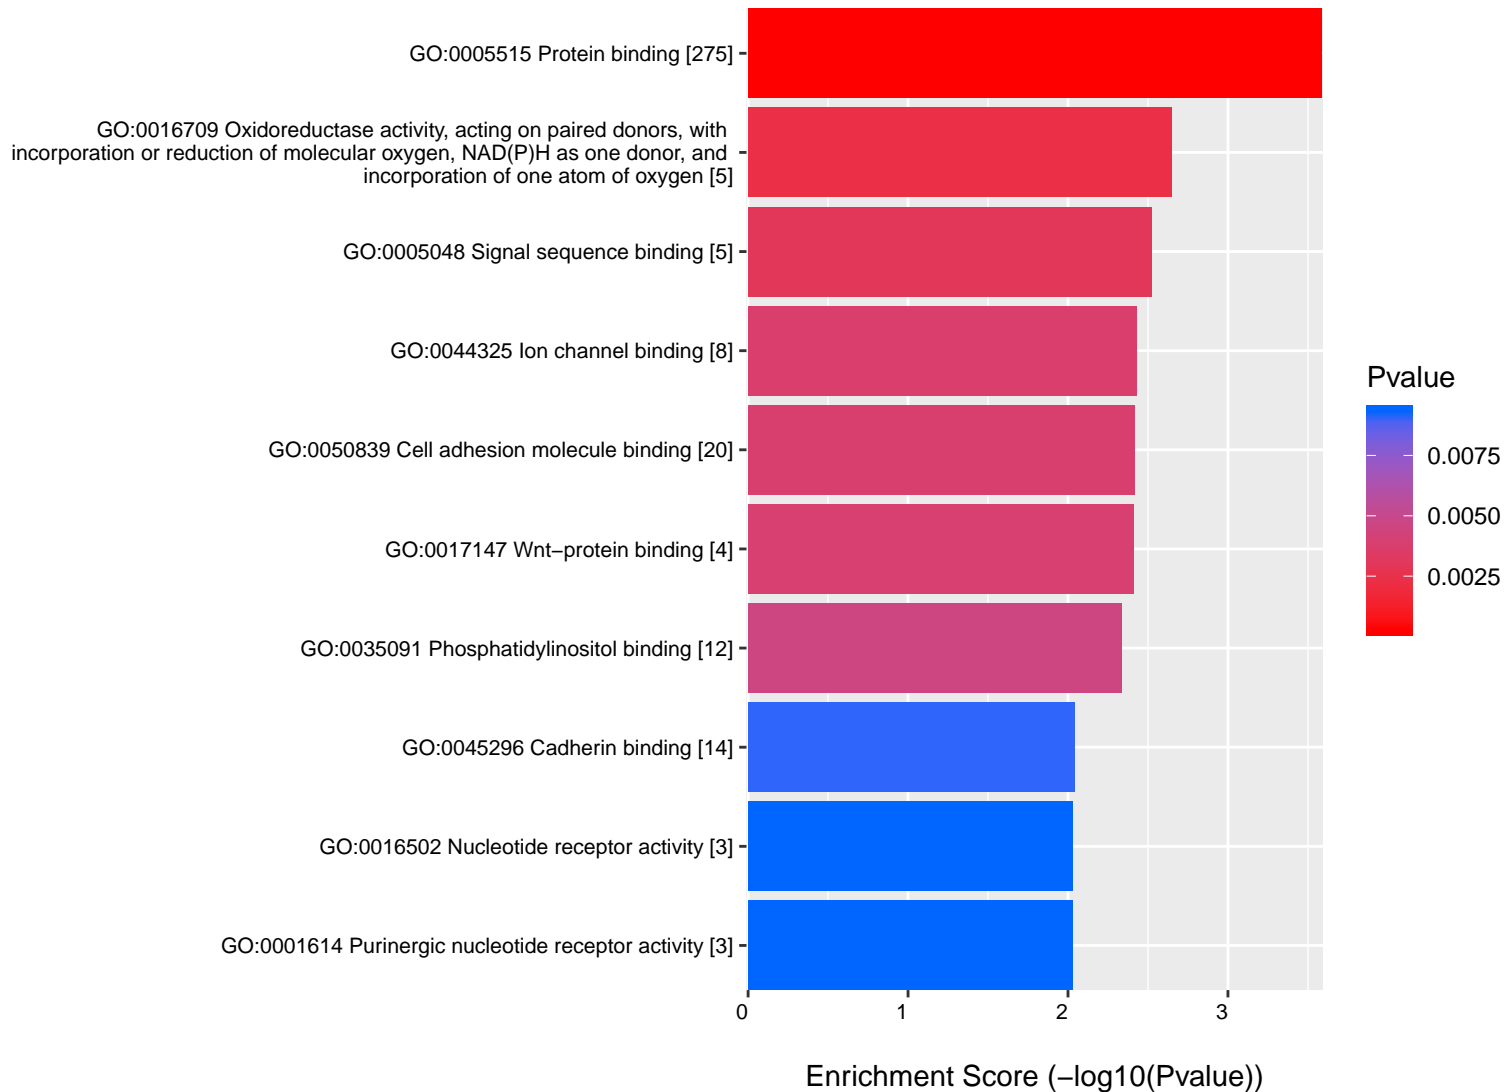

Supplement: s1 [file s1]

## Sig GO terms of DE gene-BP

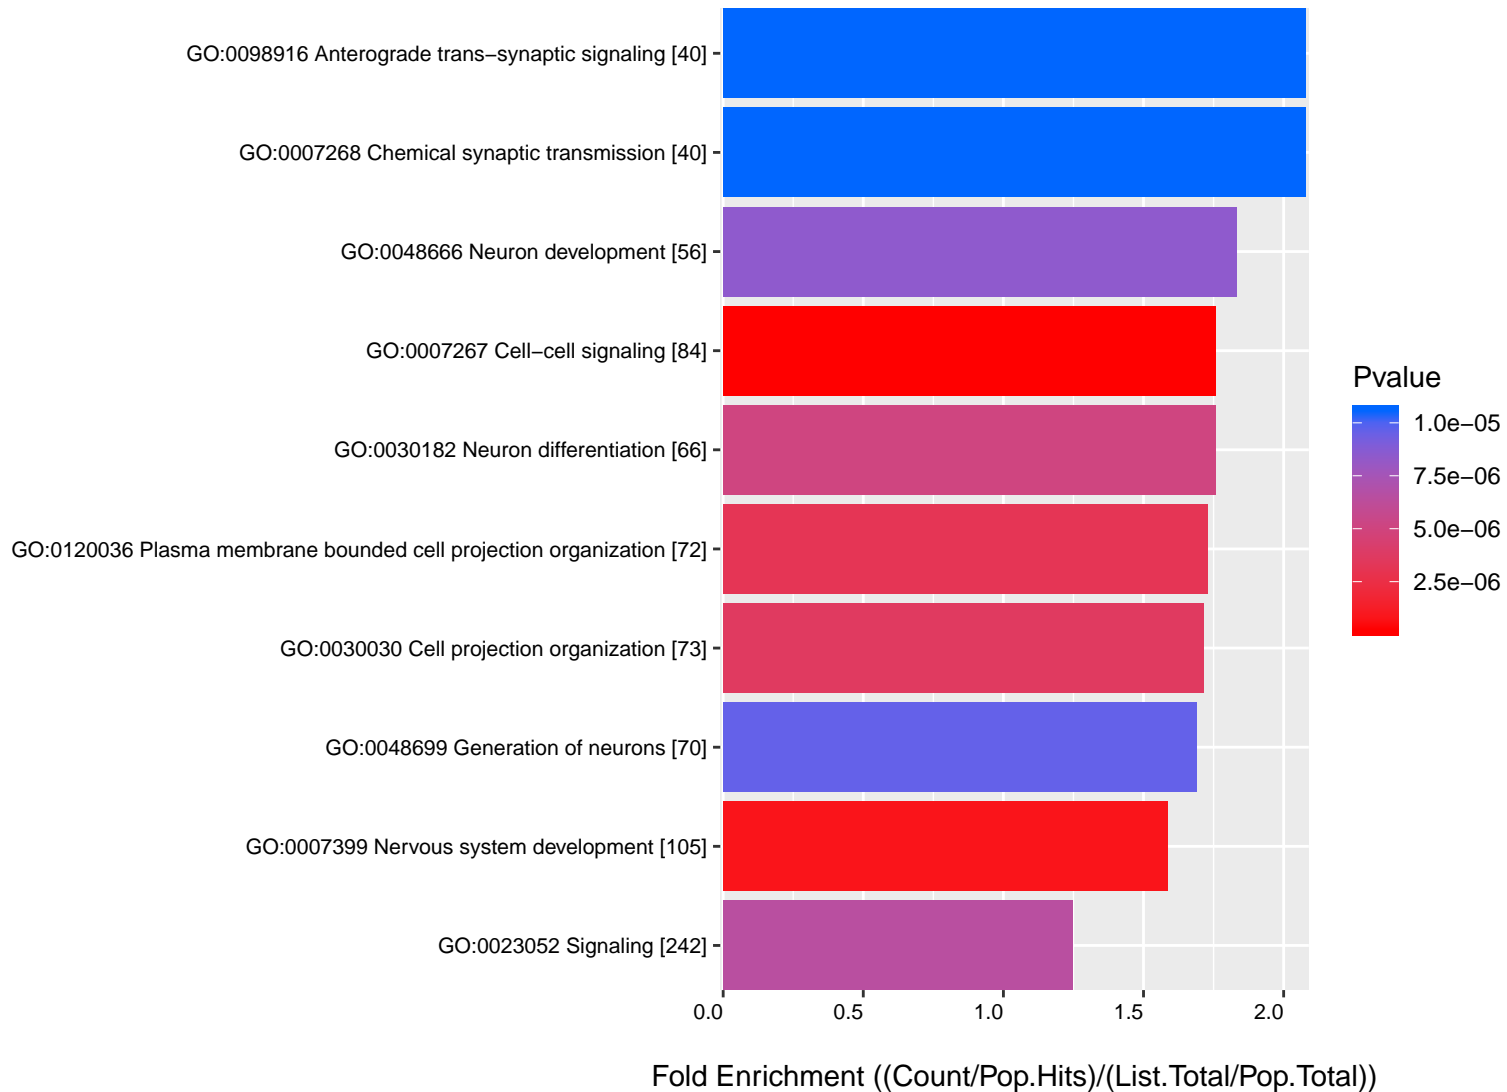

Supplement: s1 [file s1]

# Sig GO terms of DE gene-CC

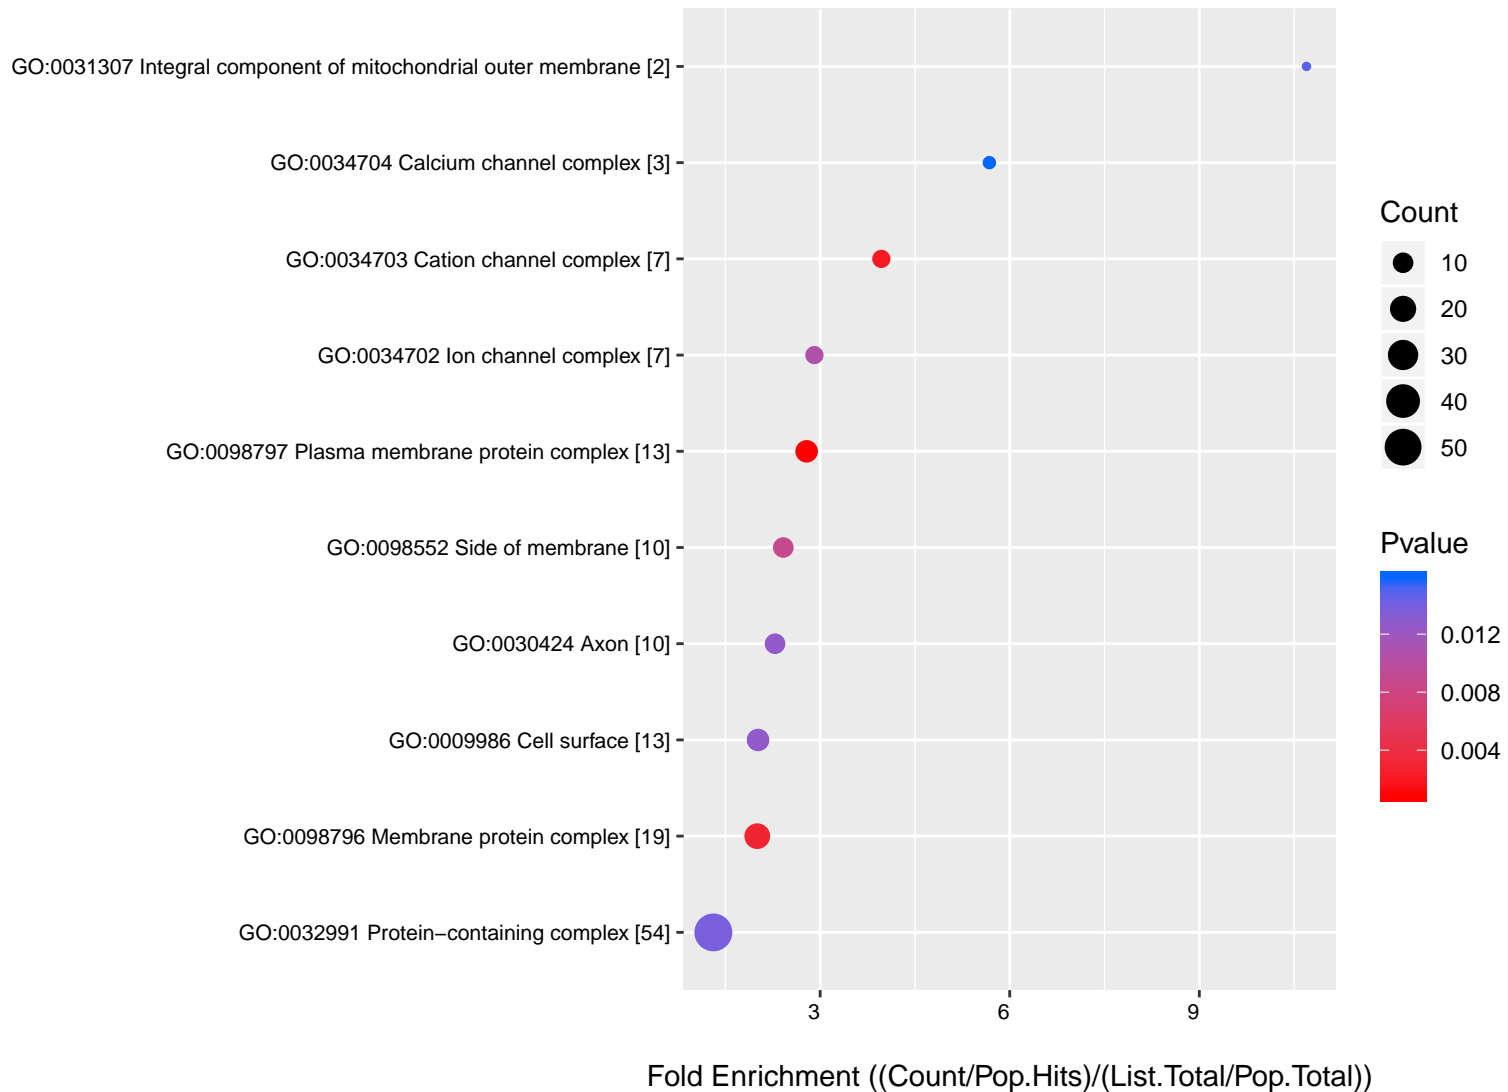

Supplement: s1 [file s1]

## Sig GO terms of DE gene-CC

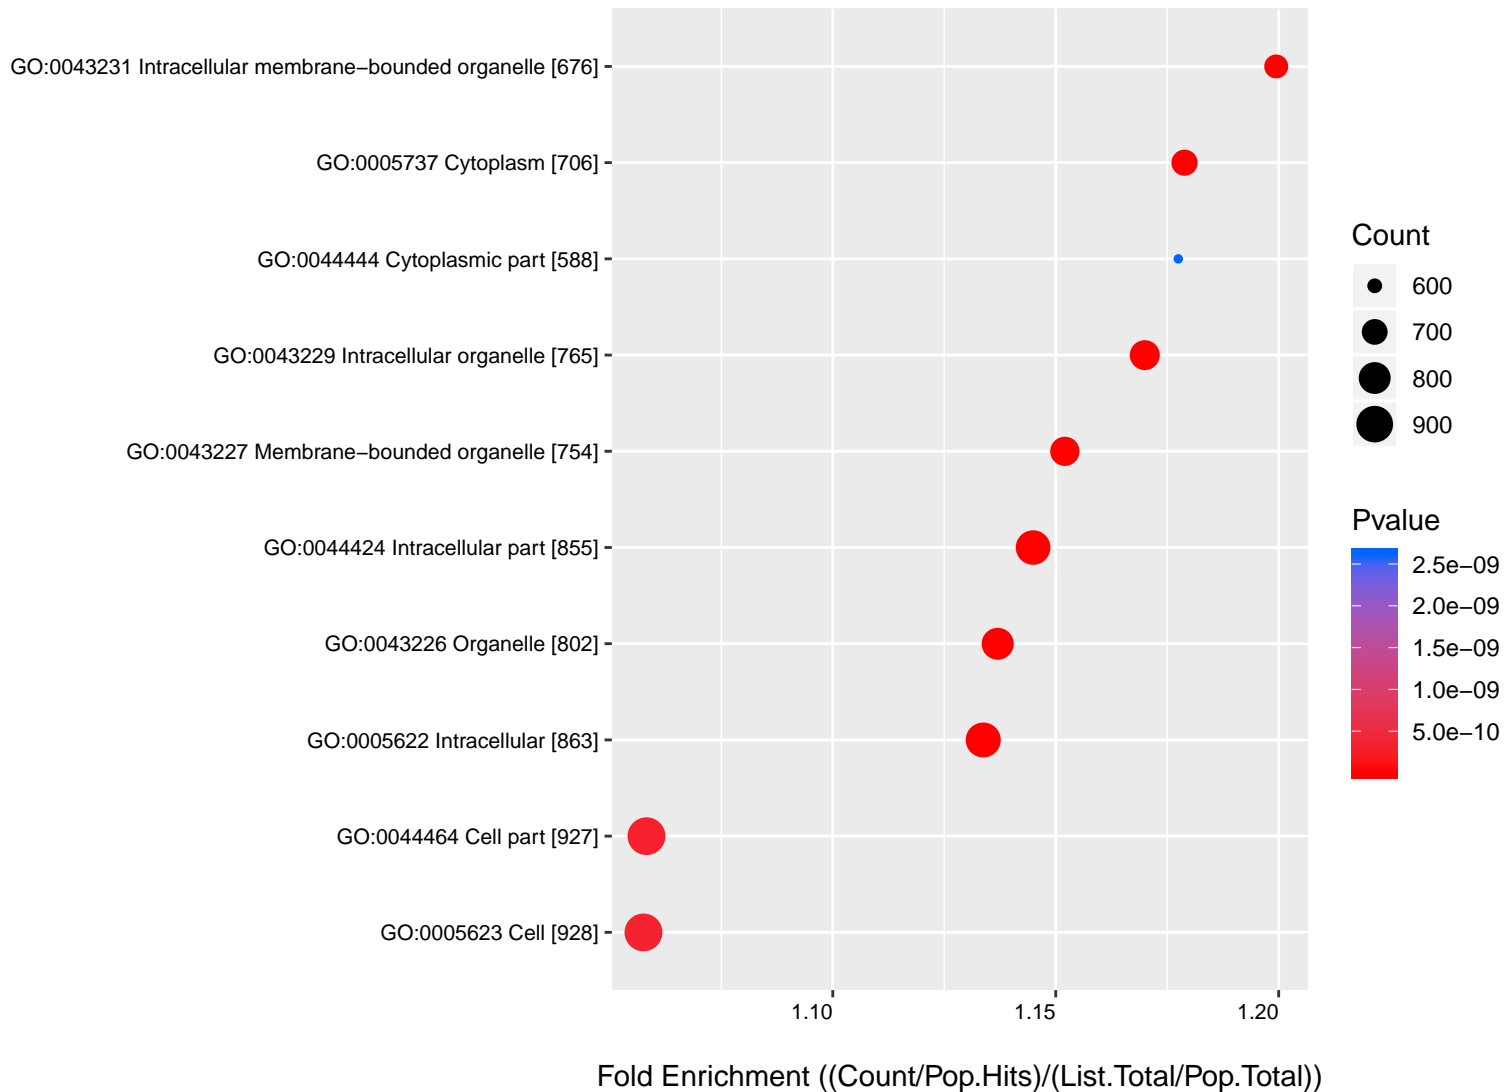

Supplement: s1 [file s1]

## Sig GO terms of DE gene-BP

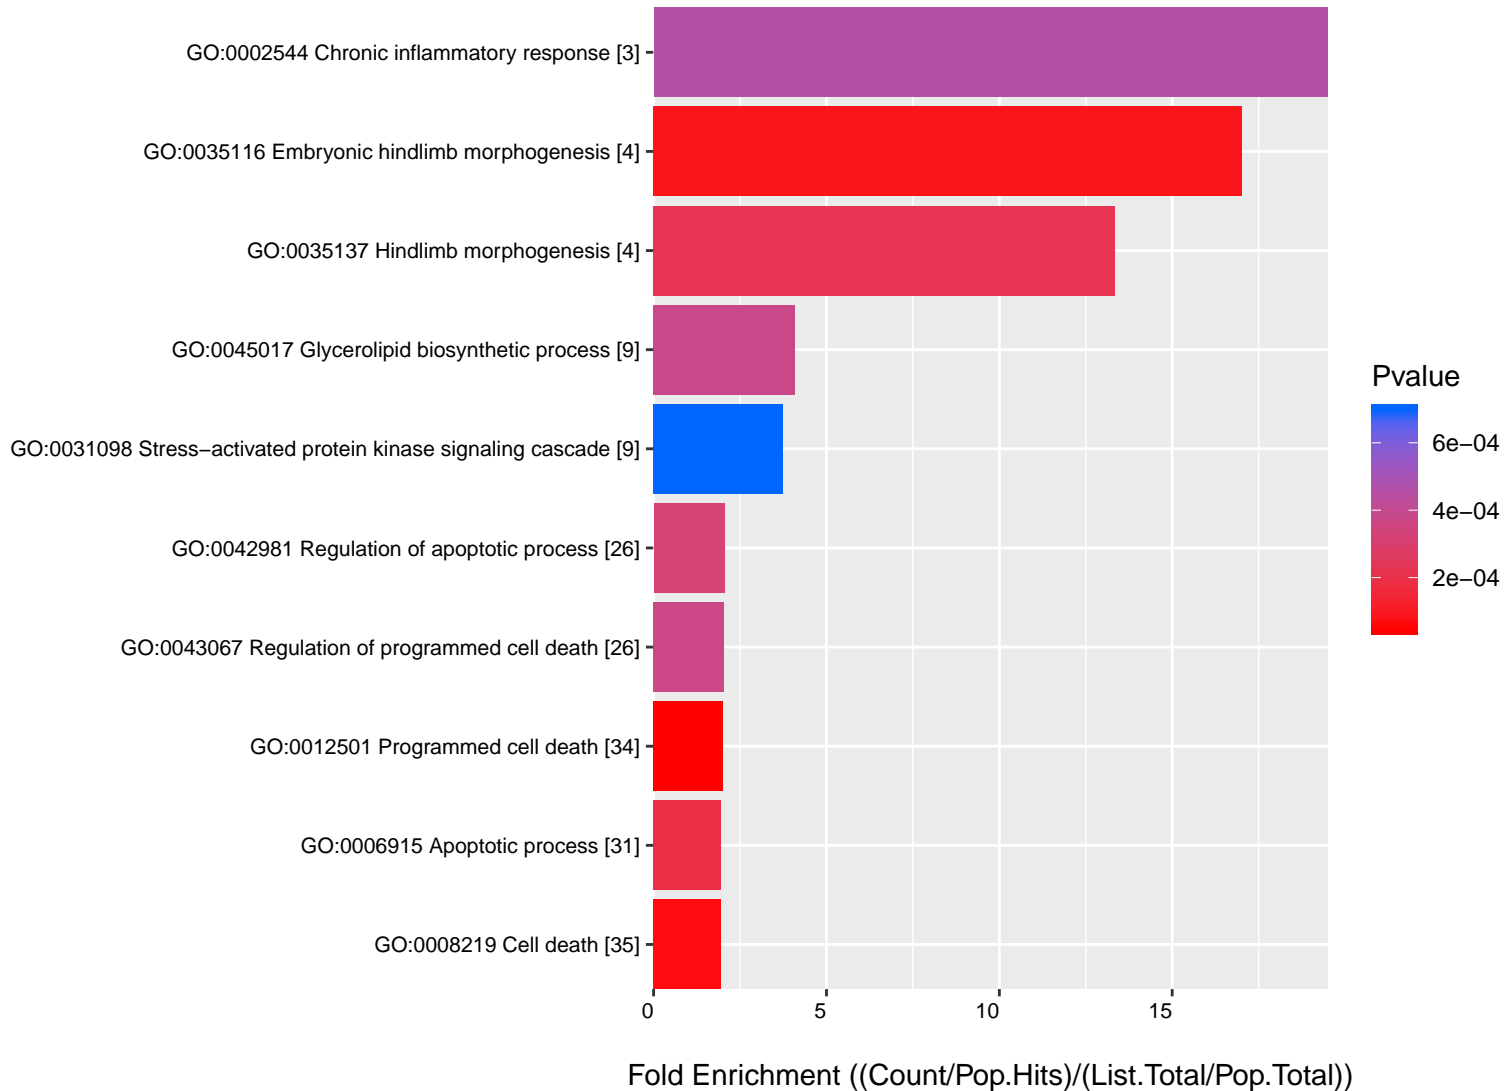

Supplement: s1 [file s1]

# Sig GO terms of DE gene-MF

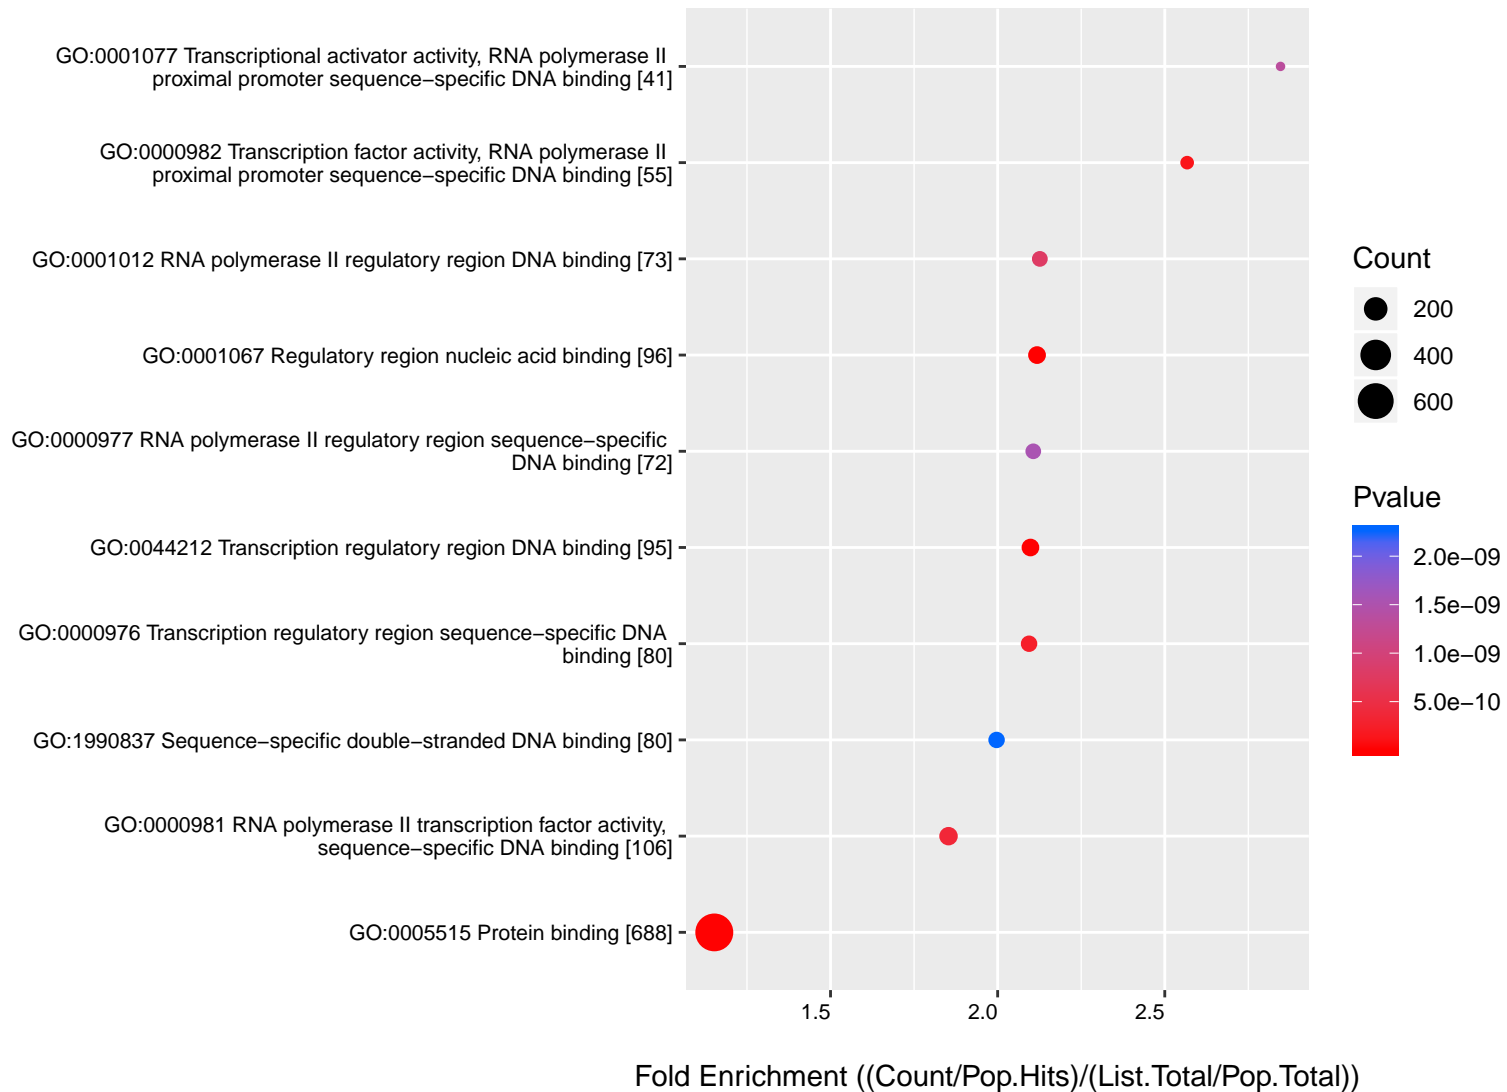

Supplement: s1 [file s1]

# Sig GO terms of DE gene-MF

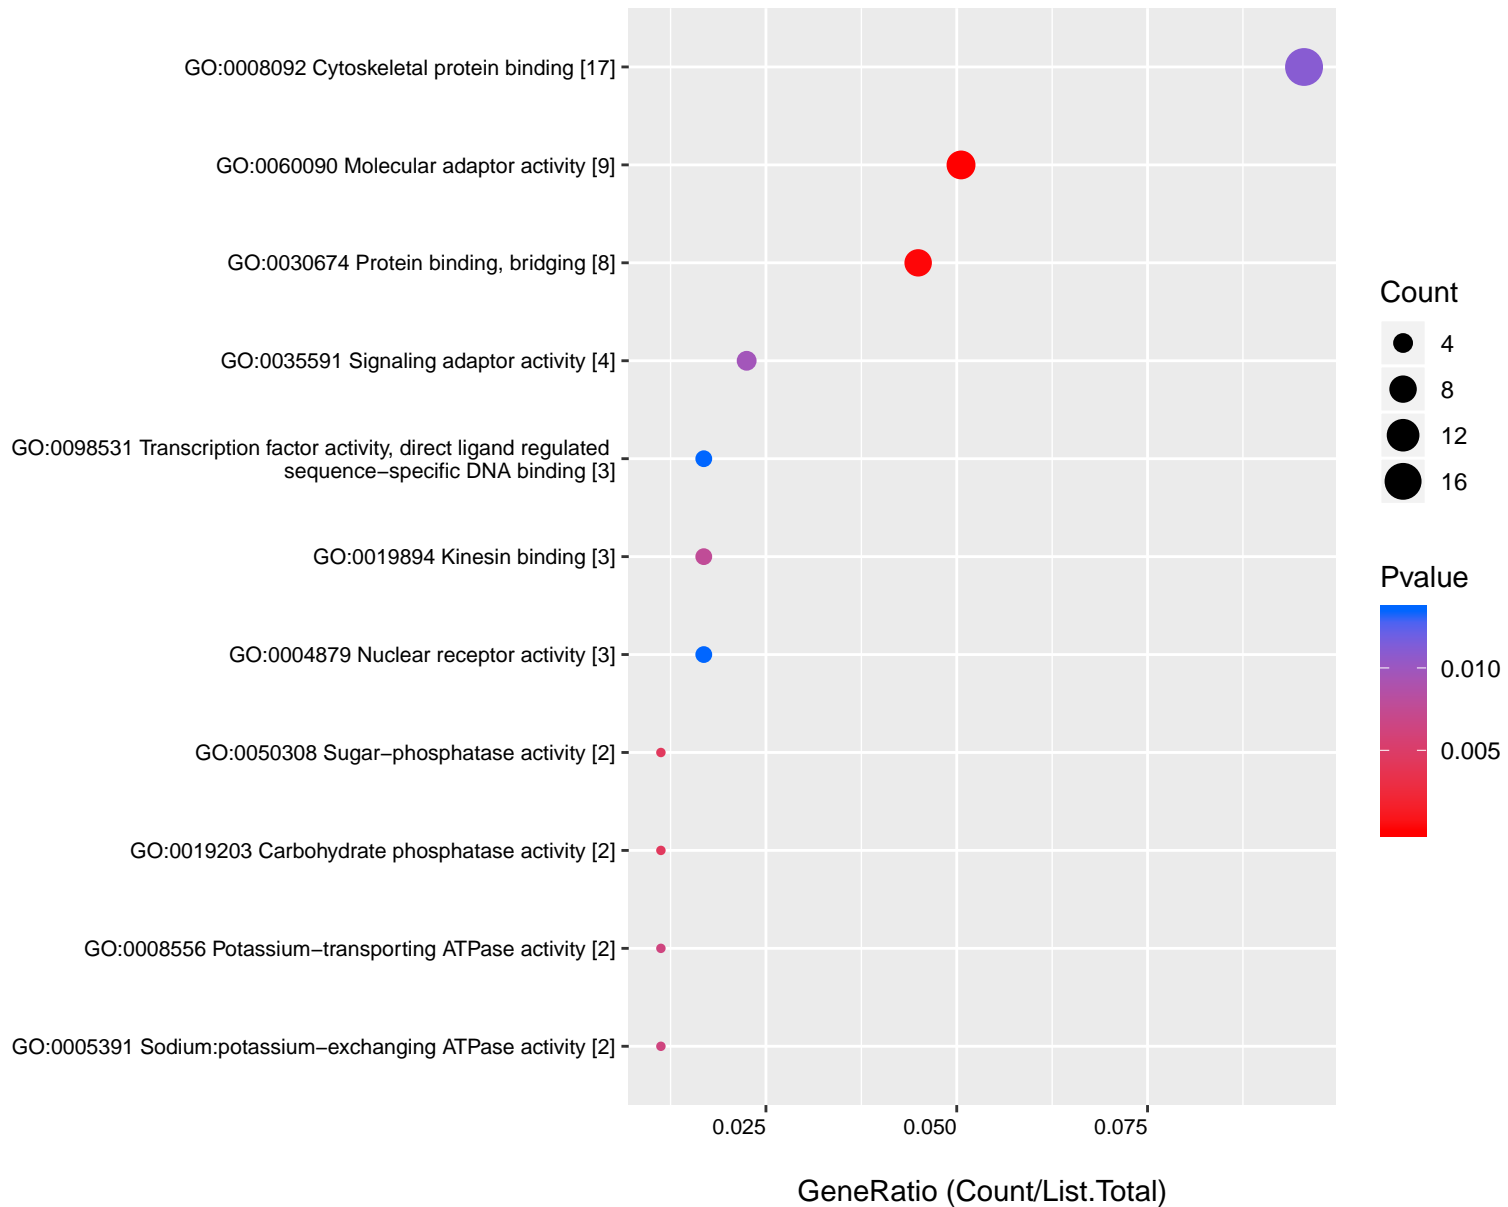

Supplement: s1 [file s1]

# Sig pathway of DE gene

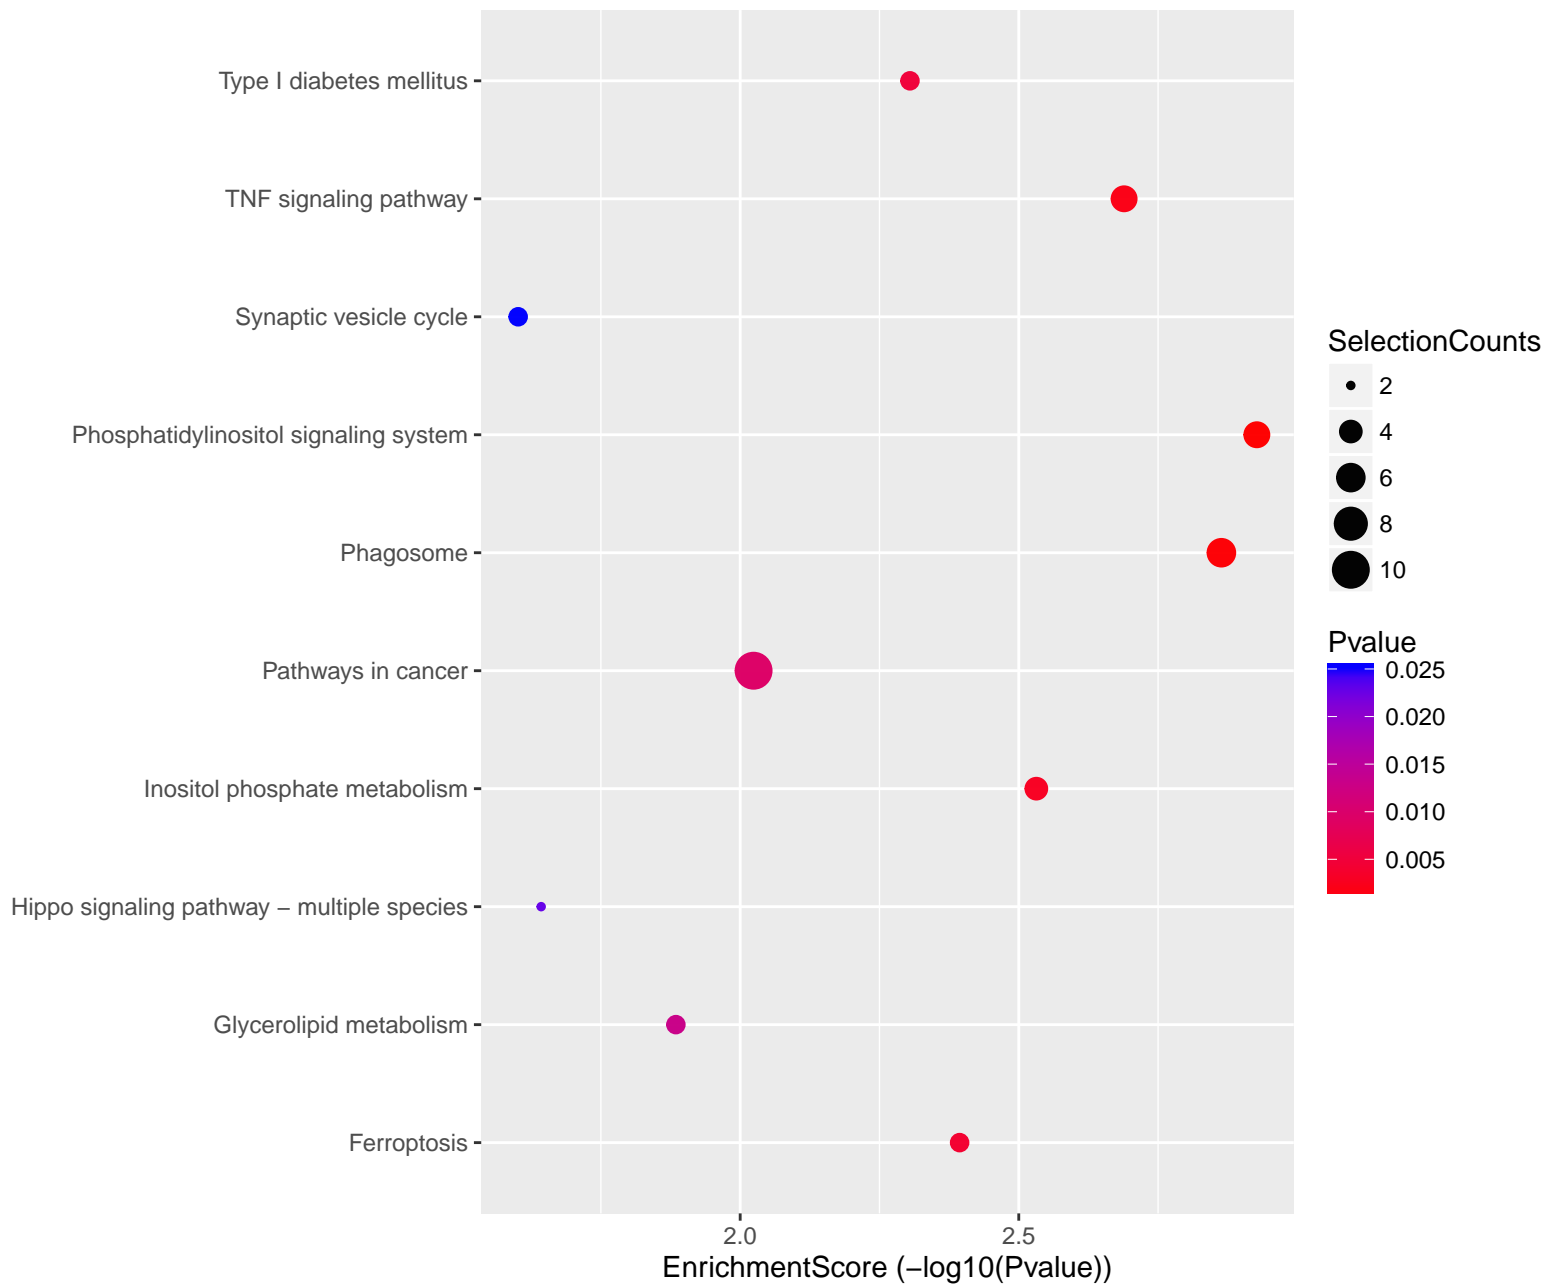

Supplement: s1 [file s1]

## Sig GO terms of DE gene-CC

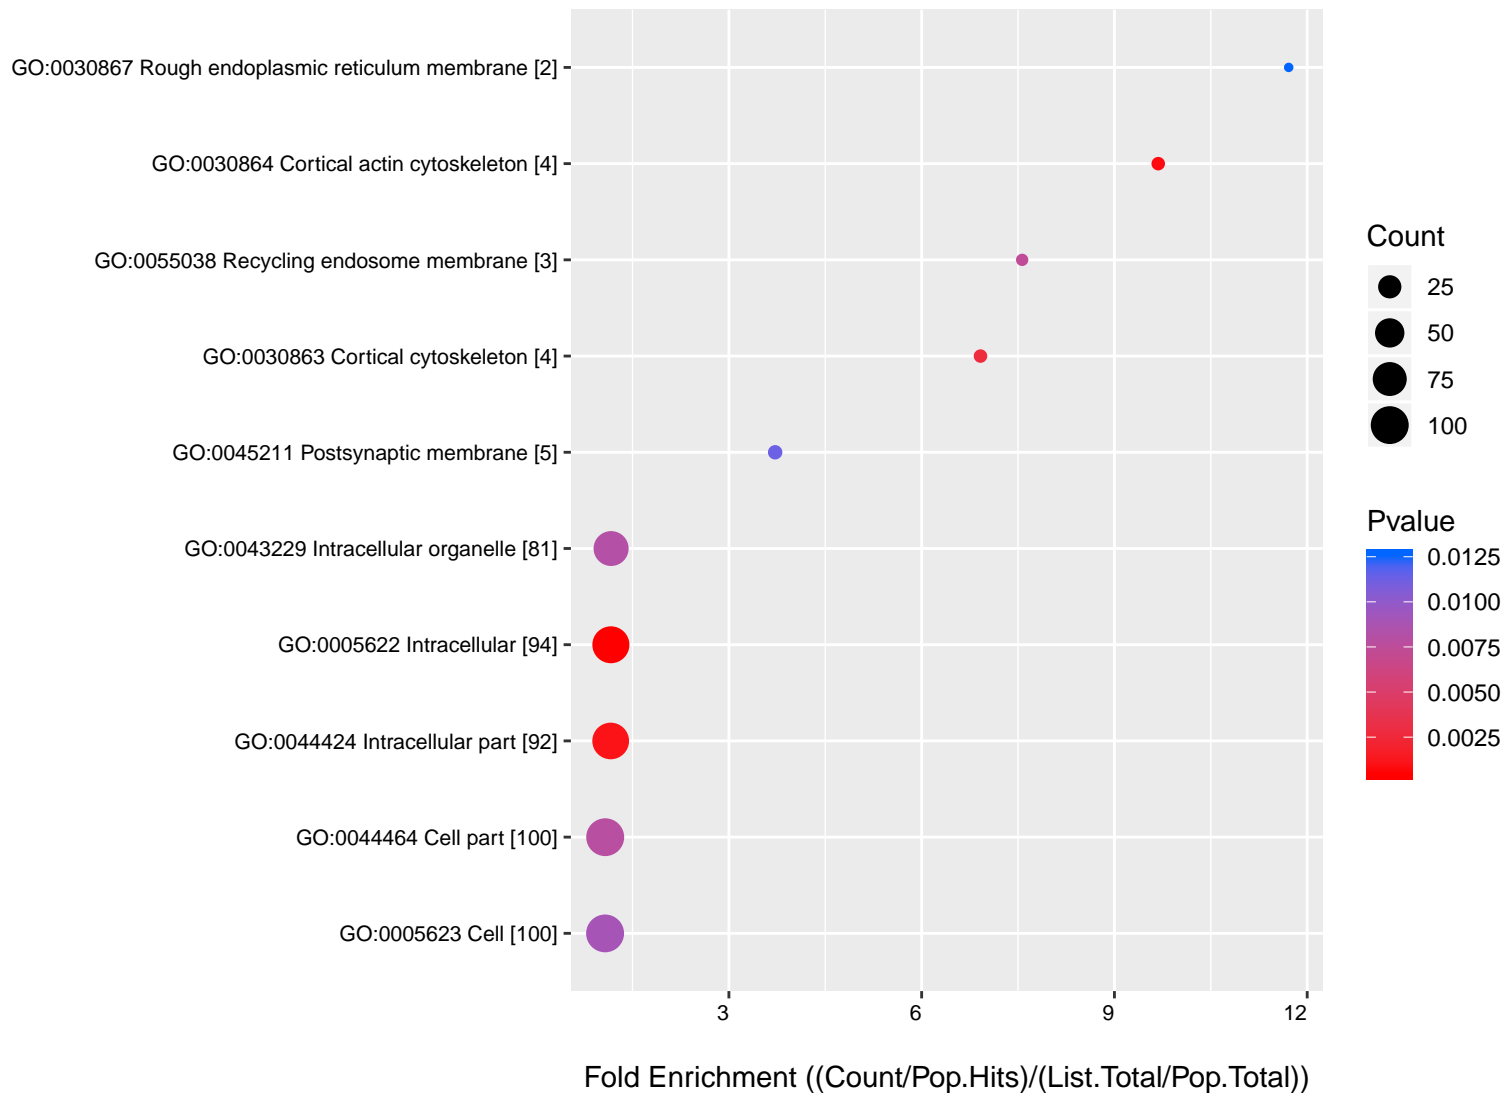

Supplement: s1 [file s1]

## Sig GO terms of DE gene-BP

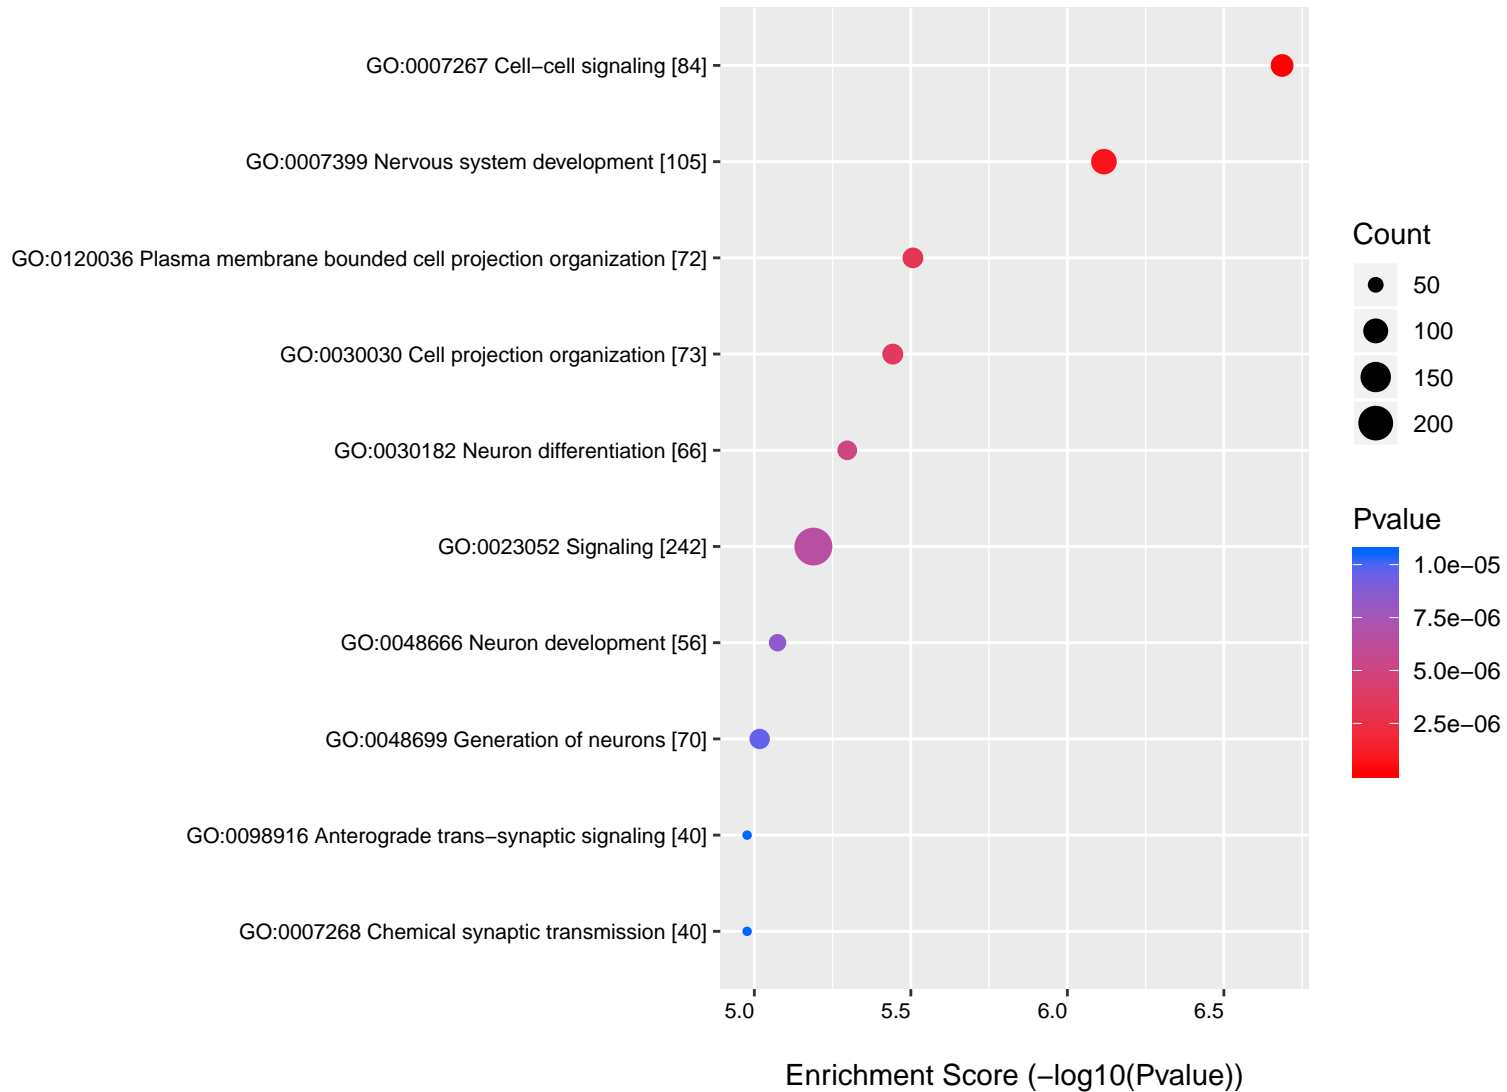

Supplement: s1 [file s1]

# GO Biological Process Classification

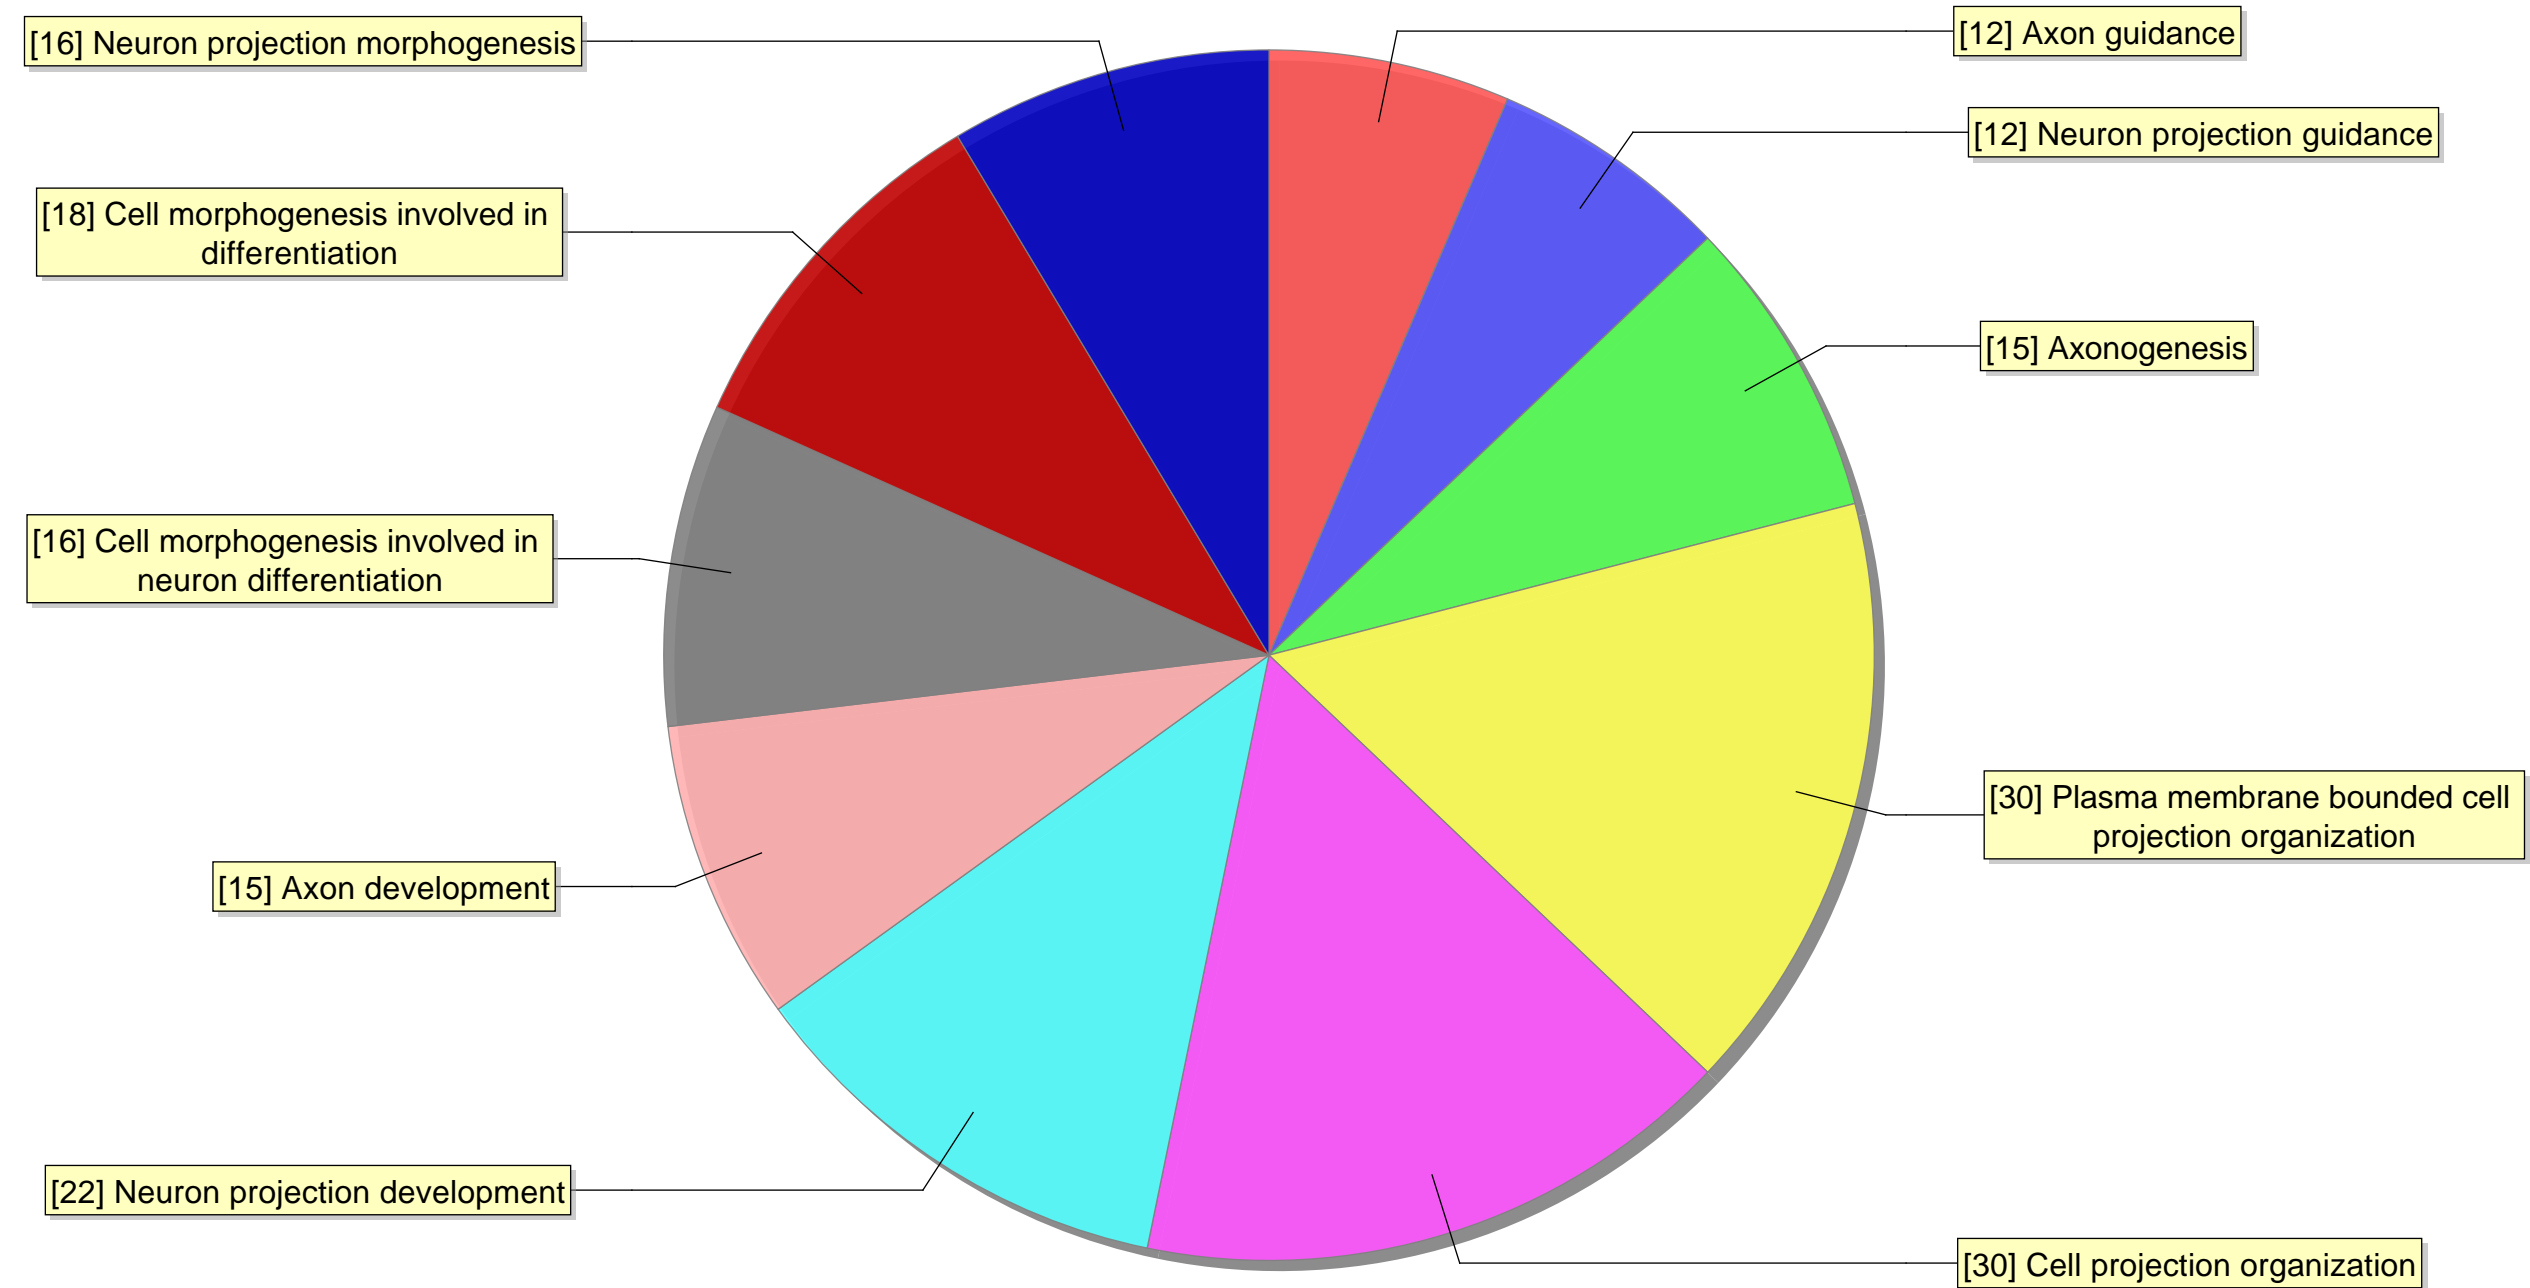

Supplement: s1 [file s1]

# Sig GO terms of DE gene–BP

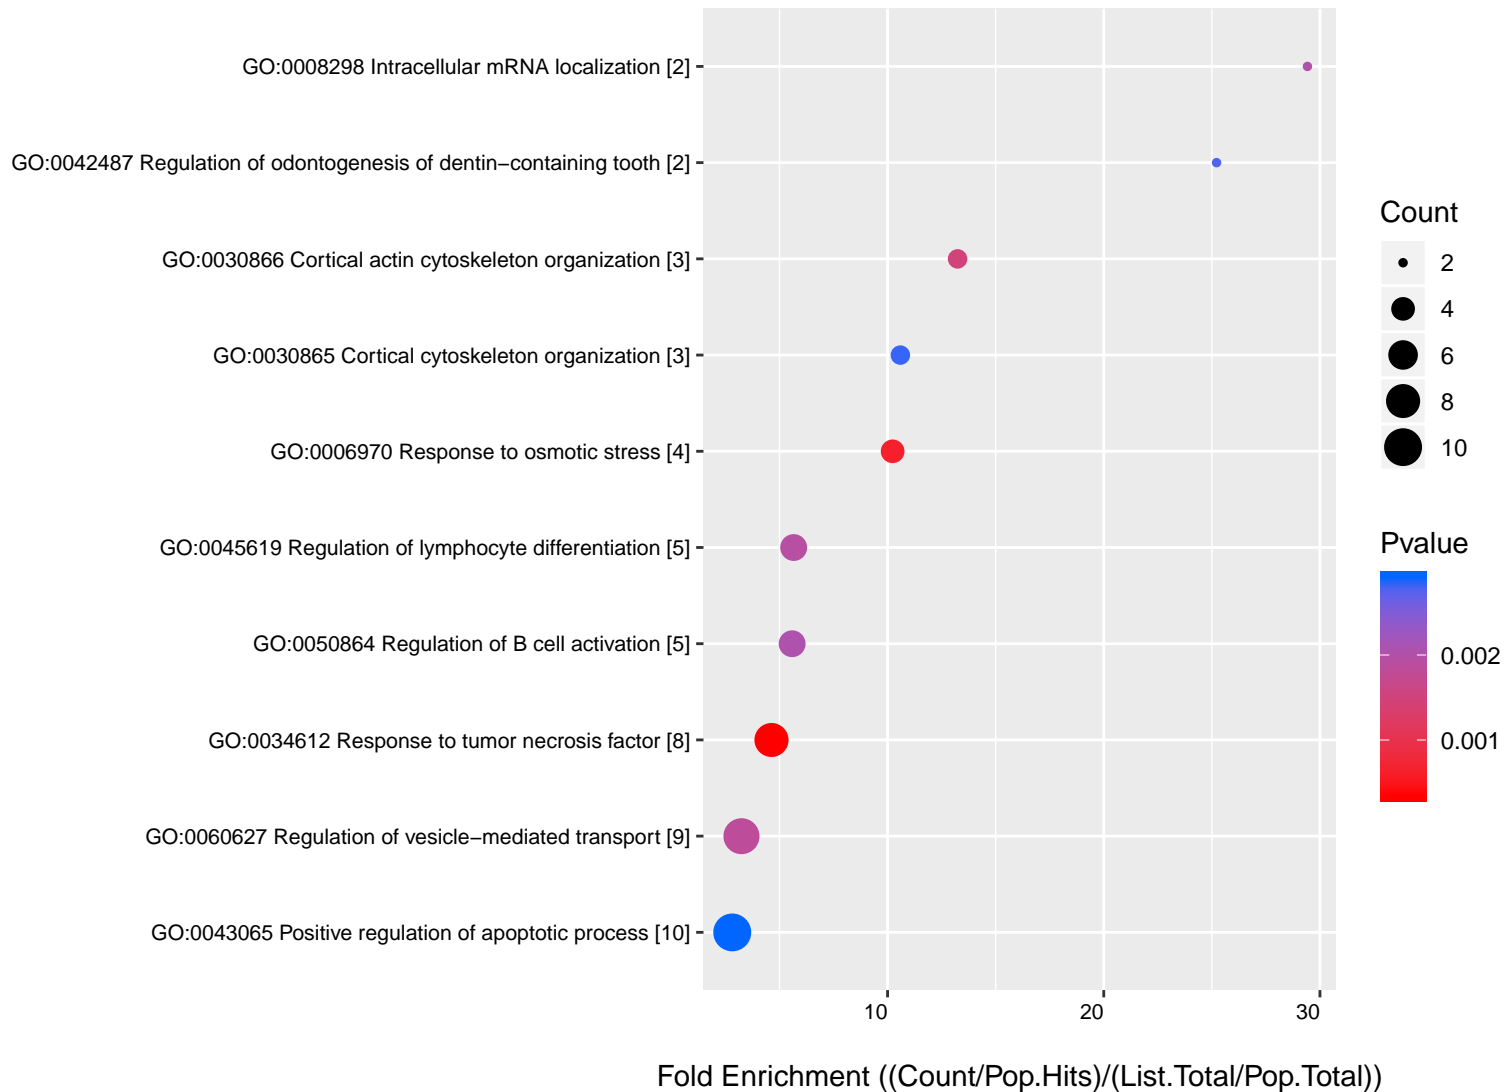

Supplement: s1 [file s1]

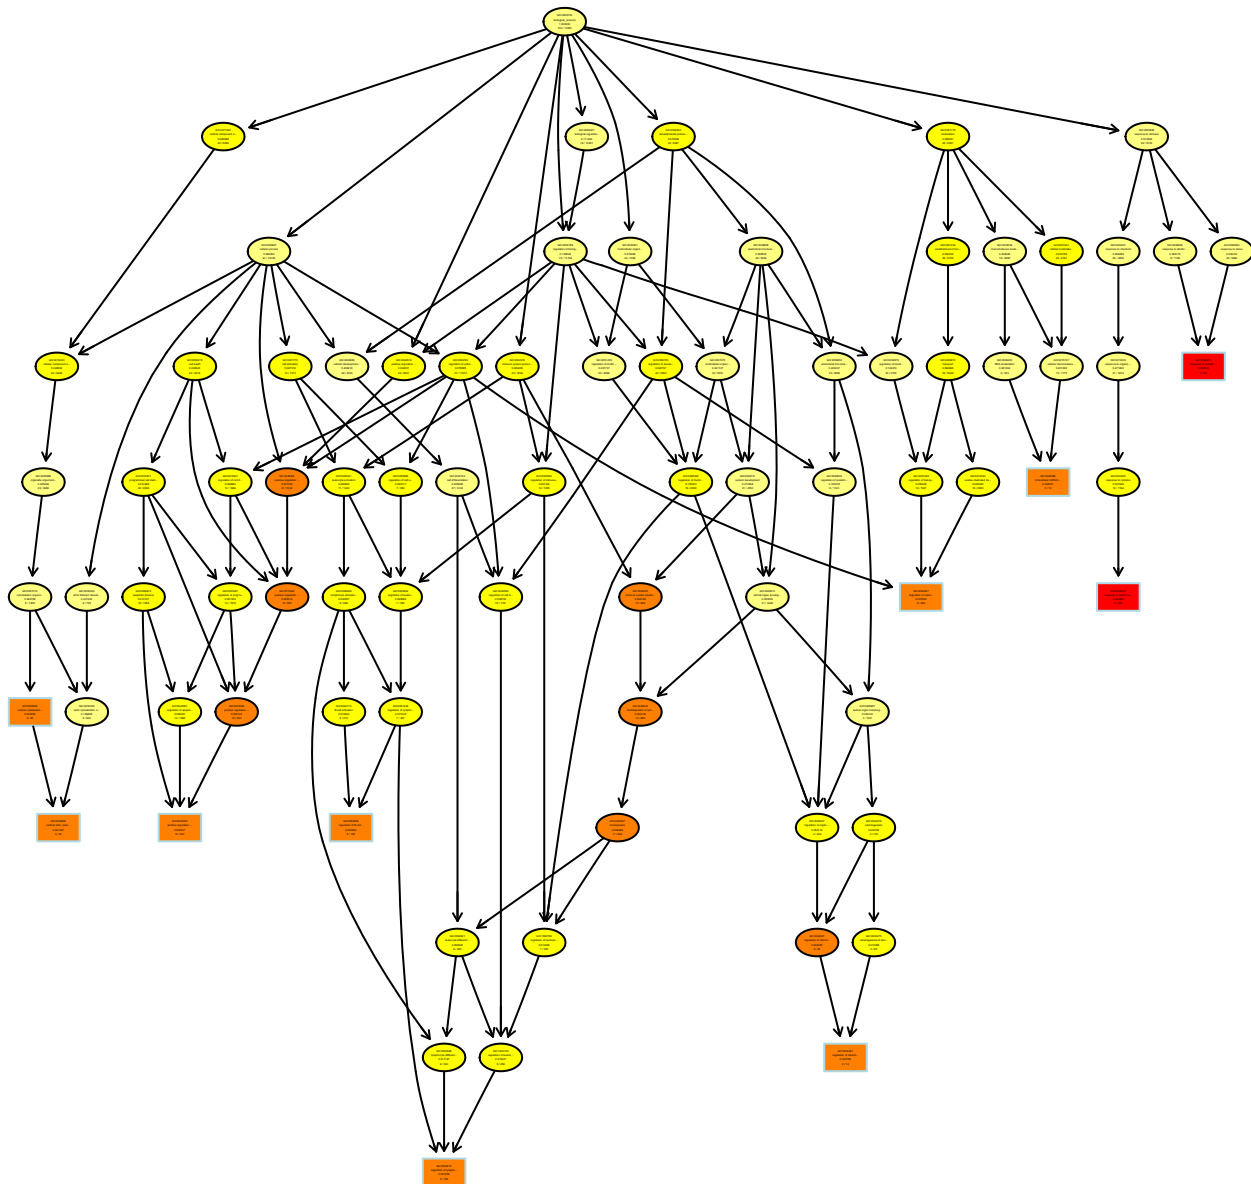

Supplement: s1 [file s1]

Sig GO terms of DE gene

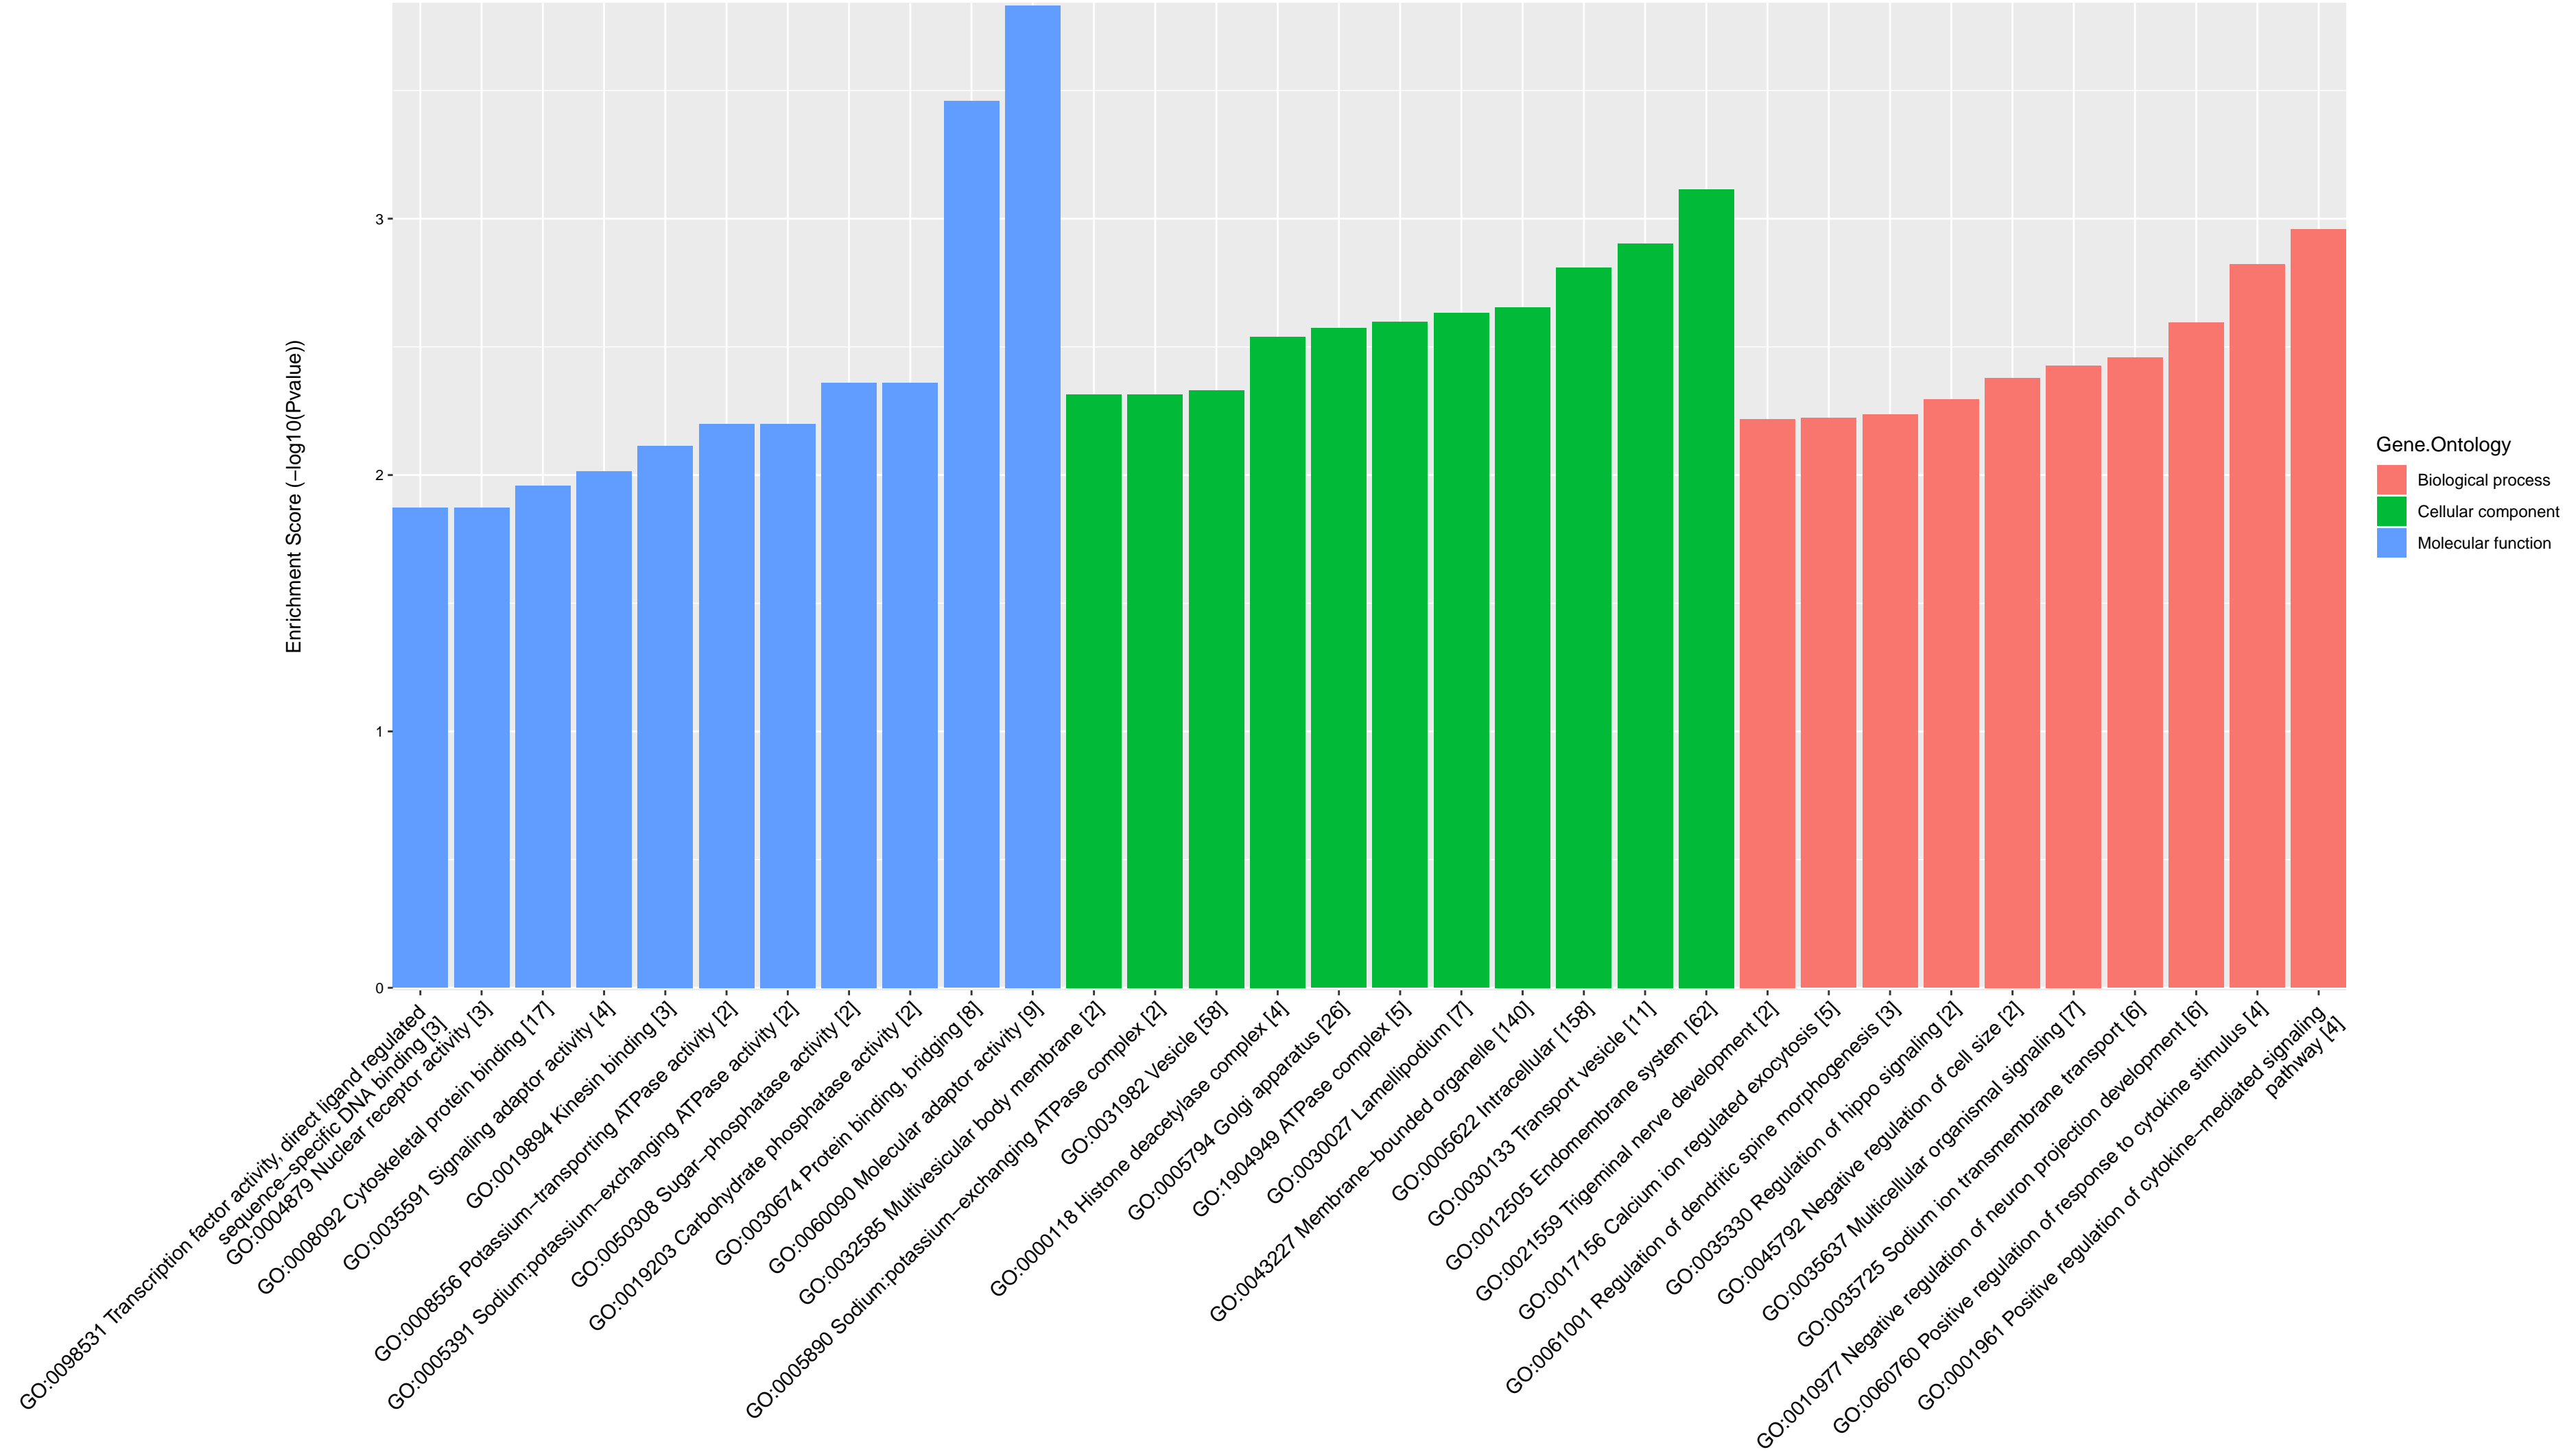

Supplement: s1 [file s1]

## Sig GO terms of DE gene-BP

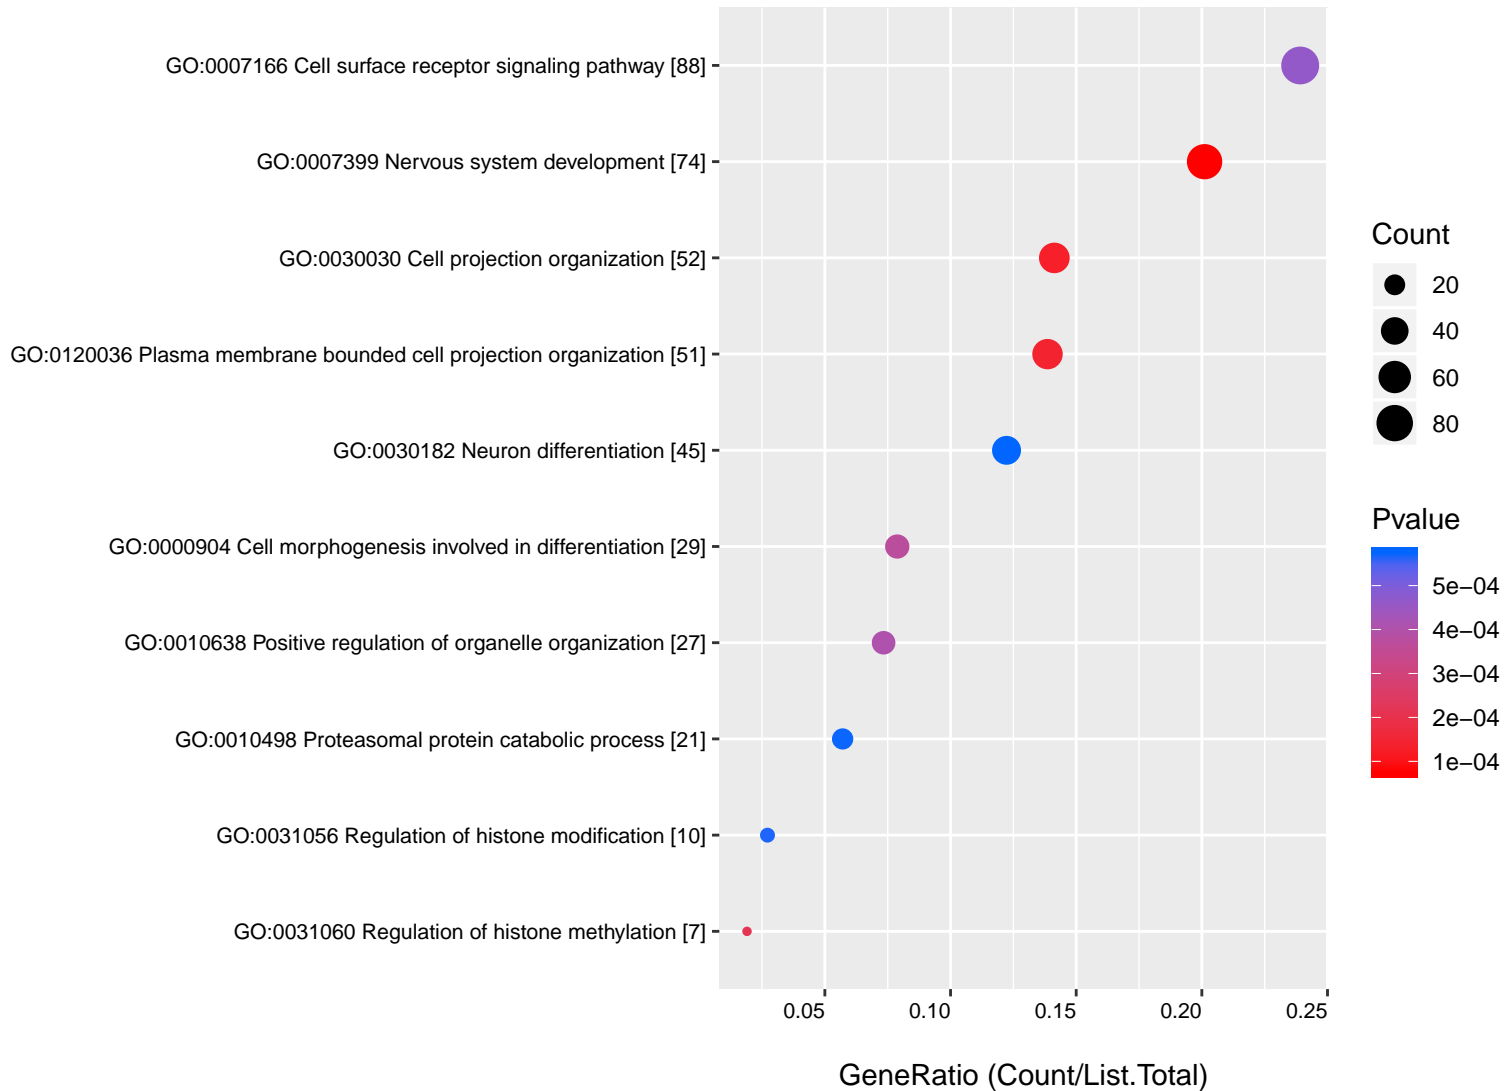

Supplement: s1 [file s1]
